# Supplementary material for: Low-cost solutions to global warming, air pollution, and energy insecurity for 145 countries
Source: Royal Society of Chemistry journal article supplement (doi:10.1039/d2ee00722c), 2022-01-01
Supplement: d2ee00722c1.pdf [file d2ee00722c1.pdf]

## Supplementary Information

### Low-Cost Solutions to Global Warming, Air Pollution, and Energy Insecurity for 145 Countries

**Mark Z. Jacobson, Anna-Katharina von Krauland, Stephen J. Coughlin,  
Emily Dukas, Alexander J.H. Nelson, Frances C. Palmer, Kylie R. Rasmussen**

This supplementary information file contains some additional description of the models plus additional tables and figures to help explain more fully the methods and results found in this study.

### Supporting Text

#### Note S1. Summary

Countries around the world are undergoing a transition to clean, renewable energy to reduce air pollution, climate-damaging pollutants, and energy insecurity. To minimize damage, all energy should ideally be transitioned by 2035. Whether this occurs will depend substantially on social and political factors. One potential barrier is the concern that a transition to intermittent wind and solar will cause blackouts. To analyze this issue, we examine the ability of 145 countries grouped into 24 world regions to avoid blackouts under realistic weather conditions that affect both energy demand and supply, when energy for all purposes originates from 100% clean, renewable (zero air pollution and zero carbon) Wind-Water-Solar (WWS) and storage. The 24 regions include a mix of seven large multi-country regions (Africa, Central America, Central Asia, China region, Europe, India region, the Middle East, South America, and Southeast Asia) and 17 individual countries or pairs of countries (Australia, Canada, Cuba, Haiti-Dominican Republic, Israel, Iceland, Jamaica, Japan, Mauritius, New Zealand, the Philippines, Russia-Georgia, South Korea, Taiwan, and the United States). Three-year (2050-52) grid stability analyses for all regions indicate that transitioning to WWS can keep the grid stable, even under variable weather conditions, at low-cost, everywhere. Annual energy costs are 62.7 (38.9-77.8)% lower and social costs (energy plus health plus climate) costs are 92.0 (72.2-96.2)% lower than in business-as-usual (BAU) cases. Batteries are the main electricity storage option in most

regions. No batteries with more than 4 hours of storage are needed. Instead, long-duration storage is obtained by concatenating batteries with 4-hour storage. The new land footprint and spacing areas required for WWS systems are small relative to the land taken up by the fossil fuel industry. The transition may create millions more long-term, full-time jobs than lost and will eliminate not only carbon, but also air pollution, from energy. There is little downside to a transition.

### **Note S2. Methodology**

This section describes the methodology for developing year-2050 roadmaps to transition each of 145 countries to 100% WWS among all energy sectors to meet annual average load. It then describes the grid integration studies for each region or country to meet continuous load every 30 seconds for three years. The main steps in performing the analysis described here are as follows:

- (1) Projecting business-as-usual (BAU) end-use energy demand from 2018 to 2050 for each of seven fuel types in each of six energy-use sectors, for each of 145 countries;
- (2) estimating the 2050 reduction in demand due to electrifying or providing direct heat for each fuel type in each sector in each country and providing the electricity and heat with WWS;
- (3) performing resource analyses then estimating mixes of wind-water-solar (WWS) electricity and heat generators required to meet the aggregate demand in each country in the annual average;
- (4) using a prognostic global weather-climate-air pollution model (GATOR-GCMOM), which accounts for competition among wind turbines for available kinetic energy, to estimate wind and solar radiation fields and building heat and cold loads every 30 seconds for three years in each country;
- (5) grouping the 145 countries into 24 world regions and using a model (LOADMATCH) to match variable energy demand with variable energy supply, storage, and demand response (DR) in each region every 30 seconds, from 2050 to 2052;
- (6) evaluating energy, health, and climate costs of WWS vs BAU;
- (7) calculating land area requirements of WWS;
- (8) calculating changes in WWS versus BAU jobs numbers; and
- (9) discussing and evaluating uncertainties.

Thus, three types of models are used for this study: a spreadsheet model (Steps 1-3), a 3-D global weather-climate-air pollution model (Step 4), and a grid model (Steps 5-8). We start with 2018 business-as-usual (BAU) end-use energy consumption data for each country from IEA (2021). End-use energy is energy directly used by a consumer. It is the energy embodied in electricity, natural gas, gasoline, diesel, kerosene, and jet fuel that people use directly, including to extract and transport fuels themselves. It equals primary energy minus the energy lost in converting primary energy to end-use energy, including the energy lost during transmission and distribution. Primary energy is the energy naturally embodied in chemical bonds in raw fuels, such as coal, oil, natural gas, biomass, uranium, or renewable (e.g., hydroelectric, solar, wind) electricity, before the fuel has been subjected to any conversion process.

For each country, the data include end-use energy in each of the residential, commercial, transportation, industrial, agriculture-forestry-fishing, and military-other sectors, and for each of six energy categories (oil, natural gas, coal, electricity, heat for sale, solar and geothermal heat, and wood and waste heat).

These data are projected for each fuel type in each sector in each country from 2018 to 2040 using “BAU reference scenario” projections for each of 16 world regions (EIA, 2016). This is extended to 2075 using a ten-year moving linear extrapolation. The reference scenario is one of moderate economic growth and accounts for policies, population growth, economic and energy growth, the growth of some renewable energy, modest energy efficiency measures, and reduced energy use. EIA refers to their reference scenario as their BAU scenario. The 2050 BAU end-use energy for each fuel type in each energy sector in each of 145 countries is then set equal to the corresponding 2018 end-use energy from IEA (2021) multiplied by the EIA 2050-to-2018 energy consumption ratio, available after the extrapolation, for each fuel type, energy sector, and region containing the country.

The 2050 BAU end-use energy for each fuel type in each sector and country is then transitioned to 2050 WWS electricity and heat using the factors in Table S3. Thus, for example, the source of residential and commercial building heat is converted from fossil fuel, wood, or waste heat to air- and ground-source heat pumps running on WWS electricity. Building cooling is also provided by heat pumps powered by WWS electricity.

Liquid fuel (mostly gasoline and diesel) and natural gas vehicles are transitioned primarily to battery electric (BE) vehicles and some hydrogen fuel cell (HFC) vehicles, where the hydrogen is produced with WWS electricity (i.e., green hydrogen). BE vehicles are assumed to dominate short- and long-distance light-duty ground transportation, construction machines, agricultural equipment, short- and moderate-distance (<1,200 km) heavy-duty trucks, trains (except where powered by electric rails or overhead wires), ferries, speedboats, and ships. Batteries will also power short-haul (<1,500 km) aircraft flights. HFC vehicles will make up all long-distance, heavy payload transport by road, rail, water, and air, as well as heavy-duty air, water, and land military transportation machines (Katalenich, 2020).

High- and medium-temperature industrial processes are electrified with electric arc furnaces, induction furnaces, resistance furnaces, dielectric heaters, and electron beam heaters. Low-temperature heat for industry is assumed to be provided with electric heat pumps.

Next, in each country, a mix of WWS resources is estimated to meet the all-sector annual-average end-use energy demand. The mix is determined after a WWS resource analysis is performed for each country and after the technical potential of each WWS resource in each country is estimated. Jacobson et al. (2017) provide the methodology for the resource analysis performed here for each country.

Solar rooftop PV technical potentials are calculated here using the method in Section S5.2.2 of Jacobson et al. (2017). Table S7 shows the results by country. The 145-country-wide 2050 rooftop area suitable for PV (south facing in the Northern Hemisphere, north facing in the Southern Hemisphere, and unshaded) over residential buildings and associated parking structures is  $\sim 116,000 \text{ km}^2$  and, for all other buildings (commercial, government, industrial), is  $\sim 49,000 \text{ km}^2$ . The associated technical potentials of solar PV are  $\sim 27.8 \text{ TW}$  and  $\sim 11.7 \text{ TW}$  nameplate capacity, respectively.

Next, we make a first estimate of the nameplate capacities of a mix of WWS generators needed to meet annual average all-purpose load in each country. The penetration of each WWS electricity generator in each country is limited by the following constraints: (1) each generator type cannot produce more electricity in the country than the technical potential allows; (2) the land area taken up among all WWS land-based generators should be no more than a few percent of the land area of the country of interest; (3) the area of installed rooftop PV in each country must be less than the respective rooftop area suitable for PV (Table S7); (4) the nameplate capacity of conventional hydro is the same as in 2020; and (6) wind and solar, which are complementary in nature, are used in roughly equal proportions where feasible.

The mix is calculated iteratively with the method in the accompanying spreadsheet (Jacobson and Delucchi, 2021). The spreadsheet-derived first-estimate nameplate capacities of onshore and offshore wind electricity, rooftop and utility PV electricity, CSP electricity, and solar thermal heat supply are then input into the global weather-climate-air-pollution model, GATOR-GCMOM (Note S3) to predict power output by country from each generator every 30 seconds during 2050-2052. From the offshore wind predictions, time-dependent wave power estimates are derived. From modeled outdoor temperatures in each near-surface grid cell in the model, heating and cooling loads in buildings are calculated every 30 seconds. Results are then aggregated by country (Jacobson, 2021a).

The time-dependent wind, solar, and wave power supplies and building thermal loads from GATOR-GCMOM are then input into the LOADMATCH grid integration model (Notes S4-S6, Table S2). Geothermal electricity and heat supplies and tidal electricity supplies are assumed to be baseload and constant throughout the year. Hydroelectricity is consumed as needed but limited by the 2020 peak discharge rate (nameplate capacity) of hydropower and by the amount of water that gave the 2020 annual average hydropower output. Rainfall and runoff replenish hydropower reservoirs continuously during the year (Table S13, footnotes). LOADMATCH is used to match time-dependent (30-s resolution) electricity and heat loads and losses with supply, storage, and demand response during 2050-2052. Notes S4-S6 describe demand response.

The regions simulated here (Table S1) cover different spatial scales, from 11 relatively small regions (Cuba, Haiti-Dominican Republic, Iceland, Israel, Jamaica, Japan, Mauritius, New Zealand, Philippines, South Korea, and Taiwan) to the continental scale. In all cases, perfectly-interconnected transmission is assumed. However, we account for transmission and distribution costs and losses (Table S17). Long-distance transmission costs increase when countries are interconnected versus isolated. For the smallest individual countries or



pairs of countries (Cuba, Haiti-Dominican Republic, Iceland, Israel, Jamaica, Mauritius, South Korea, and Taiwan), no long-distance transmission is assumed because the distance across such entities is less than a typical HVDC transmission line length (1,000-2,000 km). For New Zealand, 15% of all electricity consumed is assumed to be subject to long-distance transmission. For Central America, Japan, and the Philippines, 20% is assumed to be subject to long-distance transmission. For all other countries and regions, 30% is assumed to be subject to long-distance transmission (Table S14).

### **Note S3. Description of GATOR-GCMOM and its Calculations**

This note briefly summarizes the GATOR-GCMOM model and the main processes that it treats. GATOR-GCMOM is a three-dimension Gas, Aerosol, Transport, Radiation, General Circulation, Mesoscale, and Ocean Model (Jacobson, 2001; et al., 2007; and Archer, 2012; and Jadhav, 2018). It simulates weather, climate, and air pollution on the global through urban scales. The main processes treated are as follows:

Gas processes (emissions, gas photochemistry, gas transport, gas-to-particle conversion, gas-cloud interactions, and gas removal);

Aerosol processes (size- and composition-resolved emissions, homogeneous nucleation, coagulation, condensation, dissolution, equilibrium and non-equilibrium chemistry, aerosol-cloud interactions, and aerosol removal);

Cloud processes (size- and composition-resolved aerosol particle activation into cloud drops, drop freezing; collision-coalescence, condensation/evaporation, dissolution, ice crystal formation, graupel formation, lightning formation, convection, and precipitation; drop breakup);

Transport processes (horizontal and vertical transport of individual gas, size- and composition-resolved aerosol particles, and size- and composition-resolved hydrometeor particles)

Radiative processes (spectral solar and thermal infrared radiation; heating rates; actinic fluxes; radiation through gases, aerosols, clouds, snow, sea ice, and ocean water);

Meteorological processes (wind, temperature, pressure, humidity, size- and composition-resolved clouds);

Surface processes (dry deposition of gases, sedimentation of aerosol and hydrometeor particles, dissolution of gases and particles into the oceans and surface water, soil moisture and energy balance, evapotranspiration, sea ice and snow formation and impacts; radiative transfer through snow, sea ice, and ocean water)

Ocean processes (2-D ocean transport and 3-D ocean diffusion and chemistry, phytoplankton, radiative transfer through the ocean)

GATOR-GCMOM simulates feedbacks among all these processes, in particular among meteorology, solar and thermal-infrared radiation, gases, aerosol particles, cloud particles, oceans, sea ice, snow, soil, and vegetation. Model predictions have been compared with data in 34 peer-reviewed studies. The model has also taken part in 14 model inter-comparisons (Jacobson et al., 2019).

The model is run here at  $4^\circ \times 5^\circ$  horizontal resolution and with 68 sigma-pressure-coordinate layers in the vertical, from the ground to 0.219 hPa ( $\sim 60$  km), with 15 layers in the bottom 0.95 km. Of these, the bottom five layers above the ground are at 30-m resolution; the next seven are at 50-m resolution, one is at 100-m resolution, and the last two are at 200-m resolution. Vertical resolution from 1 to 21 km is 500 m.

Onshore wind turbines, with nameplate capacity determined from the initial spreadsheet estimate of generators needed to meet 2050 end-use load, are placed in windy areas in each country in GATOR-GCMOM. Offshore turbines are placed in coastal water in each country with a coastline. The wind turbine blades in the model cross five vertical model layers. Spatially-varying model-predicted wind speeds are used to calculate wind power output from each turbine every 30 s. This calculation accounts for the reduction in the wind's kinetic energy and speed due to the competition among wind turbines for limited available kinetic energy (Jacobson and Archer, 2012).

Rooftop solar PV panels, utility PV panels, CSP plants, and solar thermal plants, with nameplate capacity determined from the initial estimate of generators needed to meet 2050 end-use load, are placed in urban areas (rooftop PV) and in southern parts of each country in the Northern Hemisphere and northern parts in the Southern Hemisphere (utility PV, CSP, and solar thermal) in GATOR-GCMOM. The model calculates the temperature-dependence of PV output (Jacobson and Jadhav, 2018) and the reduction in sunlight to buildings and the ground due to the conversion of radiation to electricity by solar devices (Jacobson and Jadhav, 2018; Jacobson et al., 2019). It also accounts for (1) changes in air and ground temperature due to power extraction by solar and wind devices and subsequent electricity use (Jacobson and Jadhav, 2018; Jacobson et al., 2019); (2) impacts of time-dependent gas, aerosol, and cloud concentrations on solar radiation and wind fields (Jacobson et al., 2007); (3) radiation to rooftop PV panels at a fixed optimal tilt (Jacobson and Jadhav, 2018); and (4) radiation to utility PV panels, half of which are at an optimal tilt and the other half of which track the sun with single-axis horizontal tracking (Jacobson and Jadhav, 2018).

Finally, GATOR-GCMOM calculates a 30-s-resolution time series of building cooling and heating loads in each country for 2050-2052. The model predicts the ambient air temperature in each of multiple surface grid cells in each country and compares it with an ideal building interior temperature, set here to 294.261 K (70 °F). It then calculates how much heating or cooling energy is needed every 30 s to maintain the interior temperature among all buildings in the grid cell (assuming an average  $U$ -value and surface area for buildings and a given number of buildings in each grid cell) (Jacobson et al., 2021a). The time series loads among all grid cells in a country are then summed to obtain country values, which are output for use in LOADMATCH.

#### **Note S4. Description of and Processes in the LOADMATCH Model**

This note discusses the LOADMATCH model (Jacobson et al., 2015; 2018; 2019, 2021a,b) and its main processes. LOADMATCH is a trial-and-error simulation model written in Fortran. It works by running multiple simulations for each grid region, one at a time. Each simulation marches forward one timestep at a time, just as the real world does, for any number of years for which sufficient input data are available. In past studies, the model has been run for 1 to 6 years, but there is no technical or computational limit for the model running for hundreds or thousands of years, given sufficient input data.

The main constraint during a simulation is that the summed electricity, heat, cold, and hydrogen load and losses, adjusted by demand response, must match energy supply and storage every timestep for an entire simulation period. If load is not met during any timestep, the simulation stops. Inputs (either the nameplate capacity of one or more generators; the peak charge rate, peak discharge rate, or peak capacity of storage; or characteristics of demand response) are then adjusted one at a time based on an examination of what caused the load mismatch (thus it is a “trial-and-error” model). Another simulation is then run from the beginning. New simulations are run until load is met every time step of the simulation period. After load is met once, additional simulations are performed with further-adjusted inputs based on user intuition and experience to generate a set of solutions that match load every timestep. The lowest cost solution in this set is then selected.

Unlike with an optimization model, which solves among all timesteps simultaneously, a trial-and-error model does not know what the weather will be during the next timestep. Because a trial-and-error model is non-iterative, it requires less than a minute for a 3-year simulation with a 30-s timestep. This is  $1/500^{\text{th}}$  to  $1/100,000^{\text{th}}$  the computer time of an optimization model for the same number of timesteps, regardless of computer architecture. The disadvantage of a trial-and-error model compared with an optimization model is that the former does not determine the least cost solution out of all possible solutions. Instead, it produces a set of viable solutions, from which the lowest-cost solution is selected.

Table S2 summarizes many of the processes treated in LOADMATCH. Model inputs are as follows:

- (1) time-dependent electricity produced from onshore and offshore wind turbines, wave devices, tidal turbines, rooftop PV panels, utility PV plants, CSP plants, and geothermal plants;
- (2) a hydropower plant peak discharge rate (nameplate capacity), which is set to the present-day nameplate capacity, a hydropower plant mean recharge rate (from rainfall), and a hydropower plant annual average electricity output;
- (3) time-dependent geothermal heat and solar-thermal heat generation rates;
- (4) specifications of hot-water and chilled-water sensible-heat thermal energy storage (HW-STES and CW-STES) (peak charge rate, peak discharge rate, peak storage capacity, losses into storage, and losses out of storage);
- (5) specifications of underground thermal energy storage (UTES), including borehole, water pit, and aquifer storage;

- (6) specifications of ice storage (ICE);
- (7) specifications of electricity storage in pumped hydropower storage (PHS), phase-change materials coupled with CSP (CSP-PCM), and batteries;
- (8) specifications of hydrogen (for use in transportation) electrolysis, compression, and storage equipment;
- (9) specifications of electric heat pumps for air and water heating and cooling;
- (10) specifications of a demand response system;
- (11) specifications of losses along short- and long-distance transmission and distribution lines;
- (12) time-dependent electricity, heat, cold, and hydrogen loads; and
- (13) specifications of scheduled and unscheduled maintenance downtimes for generators, storage, and transmission.

From model results, differences in energy, health, and climate costs and job creation and loss between BAU and WWS are estimated. Land requirements of WWS are also calculated. Calculations of cost require specifications of generator, storage, transmission, and distribution costs and air pollution and climate costs due to BAU fuels. Changes in job numbers require specifications of job data for generators, storage, and transmission/distribution. Land requirements require specification of the installed power density of generators.

For this study, both the nameplate capacity and installed capacity of hydropower are assumed to be equal. The nameplate capacity of a technology is the peak output (discharge) rate of the technology's generators or other devices producing electricity. The installed capacity for all technologies aside from hydropower equals the nameplate capacity. For hydropower, it is the smaller of the nameplate capacity and the upper limit of the annual average power produced by available water in a hydropower reservoir (Rahi and Kumar, 2016). Thus, for example, a hydropower plant may produce no more than 1 GW of annual average power (installed capacity) due to water limitations but have a much higher peak instantaneous electricity production rate of 10 GW (nameplate capacity) due to the construction of turbines to allow hydropower to meet peaks in grid electricity demand better.

#### **Note S5. Time-Dependent Thermal and Electricity Load Profiles in LOADMATCH**

This note discusses the development of time-dependent load profiles at 30-s time resolution for use in LOADMATCH. We start with the annual-average 2050 WWS energy loads for each sector in each country from Table S4. These loads are separated into (1) electricity and direct heat loads needed for low-temperature heating, (2) electric loads needed for cooling and refrigeration, (3) electricity loads needed to produce, compress, and store hydrogen for fuel cells used for transportation, and (4) all other electricity loads (including industrial heat loads), as described in Section S1.3.3 of Jacobson et al. (2019) and updated in Jacobson (2021). Each of these loads is then divided further into flexible and inflexible loads. Flexible loads include electricity and direct heat loads that can be used to fill cold and low-temperature heat storage (district heat storage or building water tank storage), electricity loads used to produce hydrogen (since all hydrogen can be stored), and remaining electricity and direct heat loads subject to demand response. Inflexible loads are

all loads that are not flexible. Table S14 gives the percent of building heating and cooling loads subject to district heating in each region.

Loads subject to demand response can be shifted forward in time a maximum of eight hours. Loads subject to heat/cold storage can be met with such storage or with electricity, either currently available or stored. Inflexible loads must be met immediately with electricity that is currently available or stored.

To summarize cooling and low-temperature heating, total annual average cooling and low-temperature heating loads consist of flexible loads subject to storage, flexible loads subject to demand response, and inflexible loads. Such annual average cooling and low-temperature heating loads for each country are converted to time-dependent cooling and low-temperature heating loads using the time-dependent cooling and low-temperature heating load output from GATOR-GCMOM for each country (Note S3). In LOADMATCH, the cooling and low-temperature heating load time series from GATOR-GCMOM are summed for each time step over all countries in each region to obtain regional time series. The annual average of each regional time series is then found. Each regional time series, from 2050 to 2052, is then scaled by the ratio of the annual average cooling or low-temperature heating load required for a 100% WWS region in 2050 from Table S6 to the annual average cooling or heating load from the GATOR-GCMOM time series, just calculated. This gives time-dependent 2050-2052 cooling and heating loads for each region that, when averaged over time, exactly match the estimated 2050 annual average loads from Table S6.

Annual average 2050-2052 inflexible electric loads (in the residential, commercial, transportation, industrial, agriculture-forestry-fishing, and military-other sectors) in each region are converted to time-dependent 2050-2052 inflexible electric loads for the region by scaling contemporary time -dependent electric load data for the region forward to 2050-2052. Contemporary hourly load data for European are for 2014 (ENTSOE, 2026). Those for almost all remaining countries are for 2030 (Neocarbon Energy, 2021). Since load profiles for Sudan, Zimbabwe, and Equatorial Guinea do not exist from either of these datasets, their profiles are assumed to be the same as a nearby country, but with the magnitude each hour scaled so that the annual average inflexible load reflected those of the original countries.

The 2050-2052 inflexible time-series loads for each country are then obtained by multiplying the 2014 or 2030 time-series electric loads, respectively, for the country by the ratio of the annual average 2050 inflexible load for the region the country resides in (Table S6) to the sum of the annual average inflexible loads from the 2014 or 2030 time-dependent profiles among the countries in the region.

Finally, all remaining loads (all non-heating, non-cooling flexible loads), which include most electric loads for transportation (for electric and hydrogen fuel cell vehicles) and for high-temperature industrial heat, are distributed evenly during the year.

For transportation, this assumption is roughly justified by the fact that, between 2016-2019 in the U.S., for example, the minimum and maximum monthly U.S. gasoline supplies were 7.76% and 8.73%, respectively, of the annual supply (EIA, 2021b), with the highest consumption during the summer and the lowest during the winter. Both gasoline vehicle (GV) and battery-electric vehicle (BEV) ranges drop with lower temperature, with BEV ranges dropping more. For example, gasoline-vehicle fuel mileage is about 15-24% lower at 20 °F (-6.67 °C) than at 77 °F (25 °C) (U.S. DOE, 2021), whereas BEV range is ~40% lower between those two temperatures (Geotab, 2020). Since gasoline consumption is greater during summer than winter, this implies that the summer-winter difference in BEV electricity consumption will be less than the summer-winter difference in gasoline consumption, justifying a relatively even spread during the year of electricity consumption with BEVs.

Eighty-five percent of electricity loads for vehicles and 70% of electricity loads for high-temperature industrial heat are assumed to be flexible loads subject to demand response or storage. As such, these loads can be shifted forward in time if necessary or pulled from storage at whenever storage has sufficient electricity. Loads for producing hydrogen for fuel cell vehicles comprise 13.5% of all transportation loads and 6.8% of all-purpose loads among the 145 countries (Tables S6 and S5). All these loads are flexible, so hydrogen can be produced whenever excess electricity is available, and the hydrogen can then be stored and used as needed. Since 100% of electric loads for hydrogen production for vehicles (13.5% of transportation electric loads) are flexible and 85% of all transportation loads are flexible, 82.7% of all electric loads for electric vehicles are flexible.

#### **Note S6. Order of Operation in LOADMATCH**

In this section, the order of operations in LOADMATCH, including how the model treats excess generation over demand and excess demand over generation, is summarized. The first situation discussed is one in which the current (instantaneous) supply of WWS electricity or heat exceeds the current electricity or heat load. The total load, whether for electricity or heat, consists of flexible and inflexible loads. Whereas flexible loads may be shifted forward in time with demand response, inflexible loads must be met immediately. If WWS instantaneous electricity or heat supply exceeds the instantaneous inflexible electricity or heat load, then the supply is used to satisfy that load. The excess WWS is then used to satisfy as much current flexible electric or heat load as possible. If any excess electricity exists after inflexible and current flexible loads are met, the excess electricity is sent to fill electricity storage or used to produce heat, cold, or hydrogen, which is either stored or used immediately.

Electricity storage is filled first. Excess CSP high-temperature heat goes to CSP thermal energy storage in a phase-change material. If CSP storage is full, remaining high-temperature heat produces electricity that is used, along with excess electricity from other sources, to charge battery storage followed by pumped hydropower storage, cold water storage, ice storage, hot water tank storage, and underground thermal energy storage. Remaining excess electricity is used to produce hydrogen. Any residual after that is shed.



Heat and cold storage are filled by using excess electricity to power an air source or ground source heat pump to move heat or cold from the air, water, or ground to the thermal storage medium. Hydrogen storage is filled by using electricity in an electrolyzer to produce hydrogen and in a compressor to compress the hydrogen, which is then moved to a storage tank.

If any excess direct geothermal or solar heat exists after it is used to satisfy inflexible and flexible heat loads, the remainder is used to fill either district heat storage (water tank and underground heat storage) or building water tank heat storage.

The second situation is one in which current load exceeds WWS electricity or heat supply. When current inflexible plus flexible electricity load exceeds the current WWS electricity supply from the grid, the first step is to use electricity storage (CSP, battery, pumped hydro, and hydropower storage, in that order) to fill in the gap in supply. The electricity is used to supply the inflexible load first, followed by the flexible load.

If electricity storage becomes depleted and flexible load persists, demand response is used to shift the flexible load to a future hour.

If the inflexible plus flexible heat load subject to storage exceeds WWS direct heat supply, then stored district heat (in water tanks and underground storage) is used to satisfy district heat loads subject to storage, and building heat storage (in hot water tanks) is used to satisfy building water heat loads. If stored heat becomes exhausted, then any remaining low-temperature air or water heat load becomes either an inflexible load (85%), which must be met immediately with electricity, or a flexible load (15%), which can either be met with electricity or shifted forward in time with demand response and turned into an inflexible load.

Similarly, if the inflexible plus flexible cold load subject to storage exceeds cold storage (in ice or water), excess cold load becomes either an inflexible load (85%), which must be met immediately with electricity, or a flexible load (15%), which can be met with electricity or shifted forward in time with demand response and turned into an inflexible load.

Finally, if the current hydrogen load depletes hydrogen storage, the remaining hydrogen load becomes an inflexible electrical load that must be met immediately with current electricity.

In any of the cases above, if electricity is not available to meet the remaining inflexible load, the simulation stops and must be restarted after increasing nameplate capacities of generation and/or storage.

Because the model does not permit load loss at any time, it is designed to exceed the utility industry standard of load loss once every 10 years.

#### **Note S7. Calculation of Air Pollution and Climate Costs**

BAU air pollution cost estimates are based on the projected number of air pollution deaths per year due to energy in 2050 by country multiplied by a value of statistical life for each country and cost factors for morbidity and non-health environmental impacts. Table S21, Column (a) gives the estimated total number of BAU air pollution deaths by country in 2050.

Multiplying the total numbers of 2050 air pollution deaths per year from Table S21 by 90% (the estimated percentage of total air pollution mortalities that are due to energy) gives the estimated numbers of deaths per year due to energy. Multiplying those numbers by a statistical cost of life (million dollars per mortality) updated for 2020 USD from Jacobson et al. (2019) for each country and a multiplier of 1.15 for morbidity and another multiplier of 1.1 for non-health impacts (Jacobson et al., 2019) gives the 2050 annual BAU health cost by region and country in Table S20.

BAU climate costs are estimated based on the mean social cost of carbon applied to estimated anthropogenic CO<sub>2</sub>-equivalent emissions in 2050 from Table S21. The mean social cost of carbon in 2050 in each country is estimated in Table S21, Column (f), which is an update to USD 2020 from Jacobson et al. (2019).

#### **Note S8. Calculation of Land Requirements**

Footprint is the physical area on the top surface of soil or water needed for each energy device. It does not include areas of underground structures. Spacing is the area between some devices, such as wind turbines, wave devices, and tidal turbines, needed to minimize interference of the wake of one turbine with downwind turbines. Spacing area can be used for multiple purposes, including rangeland, ranching land, industrial land (e.g., installing solar panels), open space, or open water. Table S22 provides estimated footprint and spacing areas per megawatt of nameplate capacity of WWS electricity and heat generation technologies considered here.

Applying the footprint and spacing areas per megawatt nameplate capacity from Table S22 to the new nameplate capacities needed to provide grid stability (obtained by subtracting the existing nameplate capacities in Table S8 from the existing plus new nameplate capacities in Table S9) gives the total land footprint and spacing areas required for each country and region, as shown in Table S23.

New land footprint arises only for solar PV plants, CSP plants, onshore wind turbines, geothermal plants, and solar thermal plants. Offshore wind, wave, and tidal generators are in water, so they don't take up new land, and rooftop PV does not take up new land. The footprint area of a wind turbine is relatively trivial (primarily the area of the tower and of exposed cement above the ground surface).

The total new land area for footprint (before removing the fossil fuel infrastructure) required with 100% WWS is about 0.17% of the 145-country land area (Table S23), almost all for utility PV and CSP. WWS has no footprint associated with mining fuels to run the equipment, but both WWS and BAU energy infrastructures require one-time mining for raw materials for new plus repaired equipment construction.

The only spacing area over land needed in a 100% WWS world is between onshore wind turbines. Table S23 indicates that the spacing area for onshore wind to power the U.S. is about 0.36% of the 145-country land area.

Together, the new land footprint and spacing areas for 100% WWS across all energy sectors are 0.53% of U.S. land area, and most of this land area is multi-purpose spacing land.

#### **Note S9. Calculation of Job Changes**

A final metric discussed relevant to policy decision-making is net job creation and loss. Table S24 provides estimated numbers of permanent, full-time construction and operation jobs per megawatt of new nameplate capacity or kilometer of new transmission line for several electricity-generating and storage technologies and for transmission and distribution expansion. The total number of jobs produced in a region equals the new nameplate capacity of each electricity generator or storage device or the number of kilometers of new transmission/distribution lines multiplied by the respective value in the table.

The jobs per unit nameplate capacity in the table were derived for the United States primarily from the Jobs and Economic Development Impact (JEDI) models (NREL, 2019). These models estimate the number of construction and operation jobs plus earnings due to building an electric power generator or transmission line. The models treat direct jobs, indirect jobs, and induced jobs. Values are the same as in Jacobson et al. (2019), except that new values for constructing and operating heat pumps for district heat were added and HVDC job numbers were updated. Transmission/distribution job numbers came from Jacobson et al. (2017).

Direct jobs are jobs for project development, onsite construction, onsite operation, and onsite maintenance of the electricity generating facility. Indirect jobs are revenue and supply chain jobs. They include jobs associated with construction material and component suppliers; analysts and attorneys who assess project feasibility and negotiate agreements; banks financing the project; all equipment manufacturers; and manufacturers of blades and replacement parts. The number of indirect manufacturing jobs is included in the number of construction jobs. Induced jobs result from the reinvestment and spending of earnings from direct and indirect jobs. They include jobs resulting from increased business at local restaurants, hotels, and retail stores, and for childcare providers, for example. Changes in jobs due to changes in energy prices are not included. Energy price changes may trigger changes in factor allocations among capital, energy input, and labor that result in changes in the number of jobs.

Specific output from the JEDI models for each new electric power generator includes temporary construction jobs, permanent operation jobs, and earnings, all per unit nameplate capacity. A temporary construction job is defined as a full-time equivalent job required for building infrastructure for one year. A full-time equivalent (FTE) job is a job that provides 2,080 hours per year of work. Permanent operation jobs are full-time jobs that last as long as the energy facility lasts and that are needed to manage, operate, and maintain an energy generation facility. In a 100% WWS system, permanent jobs are effectively indefinite

because, once a plant is decommissioned, another one must be built to replace it. The new plant requires additional construction and operation jobs.

The number of temporary construction jobs is converted to a number of permanent construction jobs as follows. One permanent construction job is defined as the number of consecutive one-year construction jobs for  $L$  years to replace  $1/L$  of the total nameplate capacity of an energy device every year, all divided by  $L$  years, where  $L$  is the average facility life. In other words, suppose 40 GW of nameplate capacity of an energy technology must be installed over 40 years, which is also the lifetime of the technology. Also, suppose the installation of 1 MW creates 40 one-year construction jobs (direct, indirect, and induced jobs). In that case, 1 GW of wind is installed each year and 40,000 one-year construction jobs are required each year. Thus, over 40 years, 1.6 million one-year jobs are required. This is equivalent to 40,000 40-year jobs. After the technology life of 40 years, 40,000 more 1-year jobs are needed continuously each year in the future. As such, the 40,000 construction jobs are permanent jobs.

Jobs losses due to a transition to WWS will include losses in the mining, transport, processing, and use of fossil fuels, biofuels, bioenergy, and uranium. Jobs will also be lost in the BAU electricity generation industry and in the manufacturing of appliances that use combustion fuels. In addition, when comparing the number of jobs in a BAU versus WWS system, jobs are lost due to *not* constructing BAU electricity generation plants, petroleum refineries, and oil and gas pipelines.

Table S25 estimates the number of permanent, full-time jobs created and lost due to a transition in each country to 100% WWS by 2050. The job creation accounts for new direct, indirect, and induced jobs in the electricity, heat, cold, and hydrogen generation, storage, and transmission (including HVDC transmission) industries. It also accounts for the building of heat pumps to supply district heating and cooling. However it does not account for changes in jobs in the production of electric appliances, vehicles, and machines or in increasing building energy efficiency. Construction jobs are for new WWS devices only. Operation jobs are for new and existing devices.

The job losses in Table S25 are due to eliminating jobs for mining, transporting, processing, and using fossil fuels, biofuels, and uranium. Fossil-fuel jobs due to non-energy uses of petroleum, such as lubricants, asphalt, petrochemical feedstock, and petroleum coke, are retained. For transportation sectors, the jobs lost are those due to transporting fossil fuels (e.g., through truck, train, barge, ship, or pipeline); the jobs not lost are those for transporting other goods. The table does not account for jobs lost in the manufacture of combustion appliances, including automobiles, ships, or industrial machines.

Table S25 indicates that transitioning to 100% WWS may create about 28.4 million more long-term, full-time jobs than lost among 145 countries. Net job gains occur in all regions, but not in all countries within each region. Only the regions of Africa, Canada, and Russia experience net job losses. Locations with fewer net job gains or net job losses are usually locations with high job losses in the fossil fuel industry. However, some countries with

high fossil fuel employment (e.g., Saudi Arabia) have net job gains because of the large buildout of WWS infrastructure per capita in those countries.

## Supporting Tables

**Table S1.** The 24 world regions comprised of 145 countries treated in this study.

| Region          | Country(ies) Within Each Region                                                                                                                                                                                                                                                                                                                                                                                   |
|-----------------|-------------------------------------------------------------------------------------------------------------------------------------------------------------------------------------------------------------------------------------------------------------------------------------------------------------------------------------------------------------------------------------------------------------------|
| Africa          | Algeria, Angola, Benin, Botswana, Cameroon, Congo, Democratic Republic of the Congo, Côte d'Ivoire, Egypt, Equatorial Guinea, Eritrea, Ethiopia, Gabon, Ghana, Kenya, Libya, Morocco, Mozambique, Namibia, Niger, Nigeria, Senegal, South Africa, South Sudan, Sudan, Tanzania, Togo, Tunisia, Zambia, Zimbabwe                                                                                                   |
| Australia       | Australia                                                                                                                                                                                                                                                                                                                                                                                                         |
| Canada          | Canada                                                                                                                                                                                                                                                                                                                                                                                                            |
| Central America | Costa Rica, El Salvador, Guatemala, Honduras, Mexico, Nicaragua, Panama                                                                                                                                                                                                                                                                                                                                           |
| Central Asia    | Kazakhstan, Kyrgyz Republic, Pakistan, Tajikistan, Turkmenistan, Uzbekistan                                                                                                                                                                                                                                                                                                                                       |
| China           | China, Hong Kong, Democratic People's Republic of Korea, Mongolia                                                                                                                                                                                                                                                                                                                                                 |
| Cuba            | Cuba                                                                                                                                                                                                                                                                                                                                                                                                              |
| Europe          | Albania, Austria, Belarus, Belgium, Bosnia-Herzegovina, Bulgaria, Croatia, Cyprus, Czech Republic, Denmark, Estonia, Finland, France, Germany, Gibraltar, Greece, Hungary, Ireland, Italy, Kosovo, Latvia, Lithuania, Luxembourg, Macedonia, Malta, Moldova Republic, Montenegro, Netherlands, Norway, Poland, Portugal, Romania, Serbia, Slovakia, Slovenia, Spain, Sweden, Switzerland, Ukraine, United Kingdom |
| Haiti           | Dominican Republic, Haiti                                                                                                                                                                                                                                                                                                                                                                                         |
| Iceland         | Iceland                                                                                                                                                                                                                                                                                                                                                                                                           |
| India           | Bangladesh, India, Nepal, Sri Lanka                                                                                                                                                                                                                                                                                                                                                                               |
| Israel          | Israel                                                                                                                                                                                                                                                                                                                                                                                                            |
| Jamaica         | Jamaica                                                                                                                                                                                                                                                                                                                                                                                                           |
| Japan           | Japan                                                                                                                                                                                                                                                                                                                                                                                                             |
| Mauritius       | Mauritius                                                                                                                                                                                                                                                                                                                                                                                                         |
| Mideast         | Armenia, Azerbaijan, Bahrain, Iran, Iraq, Jordan, Kuwait, Lebanon, Oman, Qatar, Saudi Arabia, Syrian Arab Republic, Turkey, United Arab Emirates, Yemen                                                                                                                                                                                                                                                           |
| New Zealand     | New Zealand                                                                                                                                                                                                                                                                                                                                                                                                       |
| Philippines     | Philippines                                                                                                                                                                                                                                                                                                                                                                                                       |
| Russia          | Georgia, Russia                                                                                                                                                                                                                                                                                                                                                                                                   |
| South America   | Argentina, Bolivia, Brazil, Chile, Colombia, Curacao, Ecuador, Paraguay, Peru, Suriname, Trinidad and Tobago, Uruguay, Venezuela                                                                                                                                                                                                                                                                                  |
| Southeast Asia  | Brunei Darussalam, Cambodia, Indonesia, Lao PDR, Malaysia, Myanmar, Singapore, Thailand, Vietnam                                                                                                                                                                                                                                                                                                                  |
| South Korea     | Korea, Republic of                                                                                                                                                                                                                                                                                                                                                                                                |
| Taiwan          | Taiwan                                                                                                                                                                                                                                                                                                                                                                                                            |
| United States   | United States                                                                                                                                                                                                                                                                                                                                                                                                     |



**Table S2.** Several of the processes treated in the LOADMATCH model simulations for matching demand with supply, storage, and demand response.

| Parameter                                                          | Is the process treated? |
|--------------------------------------------------------------------|-------------------------|
| Onshore and offshore wind electricity                              | Yes                     |
| Residential, commercial/government rooftop PV electricity          | Yes                     |
| Utility PV electricity                                             | Yes                     |
| CSP electricity                                                    | Yes                     |
| Geothermal electricity                                             | Yes                     |
| Tidal and wave electricity                                         | Yes                     |
| Direct solar and geothermal heat                                   | Yes                     |
| Battery storage                                                    | Yes                     |
| CSP storage                                                        | Yes                     |
| Pumped hydropower storage                                          | Yes                     |
| Existing hydropower dam storage                                    | Yes                     |
| Added hydropower turbines                                          | No                      |
| Heat storage (water tanks, underground)                            | Yes                     |
| Cold storage (water tanks, ice)                                    | Yes                     |
| Hydrogen storage in tanks                                          | Yes                     |
| Hydrogen fuel cell vehicles for long-distance, heavy transport     | Yes                     |
| Battery-electric vehicles for all other transport                  | Yes                     |
| District heating                                                   | Yes                     |
| Electric heat pumps for building cooling and air/water heating     | Yes                     |
| Electric furnaces and heat pumps for industrial heat               | Yes                     |
| Wind, PV, CSP, solar heat, wave supply calculated in GATOR-GCMOM   | Yes                     |
| Building heat and cold loads calculated in GATOR-GCMOM             | Yes                     |
| Array losses due to wind turbines competing for kinetic energy     | Yes                     |
| Losses from T&D, storage, shedding, downtime                       | Yes                     |
| Perfect transmission interconnections                              | Yes                     |
| Costs of all generation, all storage, short- and long-distance T&D | Yes                     |
| Avoided cost of air pollution damage                               | Yes                     |
| Avoided cost of climate damage                                     | Yes                     |
| Land footprint and spacing requirements                            | Yes                     |
| Changes in job numbers                                             | Yes                     |

**Table S3.** Factors to multiply BAU end-use energy consumption by in each of six energy sectors to obtain equivalent WWS end-use energy consumption. The factors are the ratio of BAU work-output/energy-input to WWS work-output/energy-input, by fuel and sector.

|                | Residential            |                          | Comm./Govt.            |                          | Industrial             |                          | Transportation         |                          | Ag-for-fish            |                          | Military-other         |                          |
|----------------|------------------------|--------------------------|------------------------|--------------------------|------------------------|--------------------------|------------------------|--------------------------|------------------------|--------------------------|------------------------|--------------------------|
| Fuel           | Elec:<br>fuel<br>ratio | Extra<br>effic-<br>iency |
| Oil            | 0.2 <sup>a</sup>       | 0.84                     | 0.2 <sup>a</sup>       | 0.95                     | 0.78 <sup>c</sup>      | 0.98                     | .21/.52 <sup>f</sup>   | 0.96                     | 0.21                   | 0.96                     | 0.21                   | 0.96                     |
| Natural gas    | 0.2 <sup>a</sup>       | 0.81                     | 0.2 <sup>a</sup>       | 1                        | 0.78 <sup>c</sup>      | 0.98                     | .21/.52 <sup>g</sup>   | 0.88                     | 0.2                    | 0.91                     | 0.2                    | 0.91                     |
| Coal           | 0.2 <sup>a</sup>       | 1                        | 0.2 <sup>a</sup>       | 1                        | 0.78 <sup>c</sup>      | 0.97                     | --                     | --                       | 0.2                    | --                       | 0.2                    | --                       |
| Electricity    | 1 <sup>b</sup>         | 0.77                     | 1 <sup>b</sup>         | 0.78                     | 1 <sup>b</sup>         | 0.92                     | 1 <sup>b</sup>         | 1                        | 1                      | 0.78                     | 1                      | 0.78                     |
| Heat for sale  | 0.25 <sup>c</sup>      | 1.0                      | 0.25 <sup>c</sup>      | 1                        | 0.25 <sup>c</sup>      | 1                        | --                     | --                       | 0.25                   | 1                        | 0.25                   | 1                        |
| WWS heat       | 1 <sup>d</sup>         | 1                        | 1 <sup>d</sup>         | 1                        | 1 <sup>d</sup>         | 1                        | --                     | --                       | 1                      | 1                        | 1                      | 1                        |
| Biofuels/waste | 0.2 <sup>a</sup>       | 0.87                     | 0.2 <sup>a</sup>       | 1                        | 0.78 <sup>c</sup>      | 1                        | 0.21/ <sup>h</sup>     | 0.96                     | 0.2                    | 0.93                     | 0.2                    | 0.93                     |

*Residential* loads include electricity and heat consumed by households, excluding transportation.

*Comm./Govt.* loads include electricity and heat consumed by commercial and public buildings, excluding transportation.

*Industrial* loads include energy consumed by all industries, including iron, steel, and cement; chemicals and petrochemicals; non-ferrous metals; non-metallic minerals; transport equipment; machinery; mining (excluding fuels, which are treated under transport); food and tobacco; paper, pulp, and print; wood and wood products; construction; and textile and leather.

*Transportation* loads include energy consumed during any type of transport by road, rail, domestic and international aviation and navigation, or by pipeline, and by agricultural and industrial use of highways. For pipelines, the energy required is for the support and operation of the pipelines. The transportation category excludes fuel used for agricultural machines, fuel for fishing vessels, and fuel delivered to international ships, since those are included under the agriculture/forestry/fishing category.

*Agriculture-forestry-fishing* loads include energy consumed by users classified as agriculture, hunting, forestry, or fishing. For agriculture and forestry, it includes consumption of energy for traction (excluding agricultural highway use), electricity, or heating in those industries. For fishing, it includes energy for inland, coastal, and deep-sea fishing, including fuels delivered to ships of all flags that have refueled in the country (including international fishing) and energy used by the fishing industry.

*Military-other* loads include fuel used by the military for all mobile consumption (ships, aircraft, tanks, on-road, and non-road transport) and stationary consumption (forward operating bases, home bases), regardless of whether the fuel is used by the country or another country.

*Elec:fuel ratio* (electricity-to-fuel ratio) is the ratio of the energy input of end-use WWS electricity to energy input of BAU fuel needed for the same work output. For example, a value of 0.5 means that the WWS device consumed half the end-use energy as did the BAU device to perform the same work.

*Extra efficiency* is the effect of the additional efficiency and energy reduction measures in the WWS system beyond those in the BAU system and are based on the assumption of moderate economic growth. For example, in the case of natural gas, oil, and biofuels for residential air and water heating, it is the additional efficiency due to better insulation of pipes and weatherizing homes. For residential electricity, it is due to more efficient light bulbs and appliances. In the industrial sector, it is due to faster implementation of more energy efficient technologies than in the BAU case. The improvements are calculated as the product of (a) the ratio of energy use, by fuel and energy sector, of the EIA (2021)'s *high efficiency all scenarios* (HEAS) case and their *reference* (BAU) case and (b) additional estimates of slight efficiency improvements beyond those in the HEAS case (Jacobson et al., 2019).

*Oil* includes end-use energy embodied in oil products, including refinery gas, ethane, liquefied petroleum gas, motor gasoline (excluding biofuels), aviation gasoline, gasoline-type jet fuel, kerosene-type jet fuel, other kerosene, gas oil, diesel oil, fuel oil, naphtha, white spirit, lubricants, bitumen, paraffin waxes, petroleum coke, and other oil products. Does not include oil used to generate electricity.

*Natural gas* includes end-use energy embodied in natural gas. Does not include natural gas used to generate electricity.

*Coal* includes end-use energy embodied in hard coal, brown coal, anthracite, coking coal, other bituminous coal, sub-bituminous coal, lignite, patent fuel, coke oven coke, gas coke, coal tar, brown coal briquettes, gas works gas, coke oven gas, blast furnace gas, other recovered gases, peat, and peat products. Does not include coal used to generate electricity.

*Electricity* includes end-use energy embodied in electricity produced by any source.

*Heat for sale* is end-use energy embodied in any heat produced for sale. This includes mostly waste heat from the combustion of fossil fuels, but it also includes some heat produced by electric heat pumps and boilers.

*WWS heat* is end-use energy in the heat produced from geothermal heat reservoirs and solar hot water heaters.

*Biofuels and waste* include end-use energy for heat and transportation from solid biomass, liquid biofuels, biogas, biogasoline, biodiesel, bio jet kerosene, charcoal, industrial waste, and municipal waste.

<sup>a</sup>The ratio 0.2 assumes electric heat pumps (mean coefficient of performance, COP, of 4, with a range of 3.2 to 5.2) replace oil, gas, coal, biofuel, and waste combustion heaters (COP=0.803) for low temperature air and water heating in buildings. The ratio is calculated by dividing the COP of BAU heaters by that of heat pumps. The mean heat pump COP of 4 assumes 60% of heat pumps are air-source at the low end of the range (COP=3.2) and 40% are ground source at the high end of the range (COP=5.2). The COP of combustion heaters assumes 98% have a COP of 0.8 and 2% have a COP of 0.95.

<sup>b</sup>Since *electricity* is already end-use energy, there is no reduction in end-use energy (only in primary energy) from using WWS technologies to produce electricity.

<sup>c</sup>Since *heat for sale* is low-temperature heat, it will be replaced by heat from electric heat pumps (mean COP=4) giving an electricity-to-fuel ratio of 0.25 (=1/4). Heat for sale is also low-temperature heat in the industrial sector, so it is replaced in that sector with heat pumps as well.

<sup>d</sup>Since *WWS heat* is already from WWS resources, there is no reduction in end-use or primary energy upon a transition to 100% WWS for this source.

<sup>e</sup>The ratio 0.78 for industrial heat processes assumes a mixture of electric resistance furnaces, arc furnaces, induction furnaces, and dielectric heaters replace oil, gas, coal, biofuels, and waste combustion heaters for medium and high-temperature heating processes (above 100 °C). It also assumes that heat pumps replace those fuels for low-temperature heating processes. The electricity-to-fuel ratio for high-temperature replacement is 0.88 (=0.854/0.97), where 0.854 is the mean COP for natural gas, coal, or oil boilers and 0.97 is that for electric resistance furnaces. The COP for fossil fuel boilers assumes 80% have a COP of 0.8 and 20% have a COP of 107%, which can occur because some industrial boilers recapture waste heat and latent heat of condensation, and the COP is based on the lower heating value). The electricity-to-fuel ratio for heat pumps replacing low-temperature industrial heat processes is 0.21 (=0.854/4), where 0.854 was just defined and 4 is the mean COP of a heat pump. It is assumed that 15% of industrial heat will be with heat pumps (electricity-to-fuel ratio of 0.21) and 85% with high-temperature replacements (0.88), giving a mean replacement ratio of 0.78. The industrial sector electricity-to-fuel ratio and extra efficiency measure factors are applied only after industrial sector BAU energy used for mining and processing fossil fuels, biofuels, bioenergy, and uranium (industry “own use”) has been removed from each fuel sector. The amount of industry own use is given in IEA (2021) for each country.

<sup>f</sup>The electricity-to-fuel ratio for a battery-electric (BE) vehicle is 0.21; that for a hydrogen fuel cell (HFC) vehicle is 0.52. The ratio for BE vehicles is calculated assuming 85% of vehicles have a ratio of 0.19 and 15% have a ratio of 0.31. The 0.19 ratio is calculated as the ratio of the low tank-to-wheel efficiency of internal combustion engine (ICE) vehicles (0.17) to the high plug-to-wheel efficiency of a BE vehicle (0.89). The 0.31 value is calculated as the high efficiency of an ICE vehicle (0.2) divided by the low efficiency of a BE vehicle (0.64). The 0.52 ratio for HFC vehicles is calculated assuming 85% of vehicles have a ratio of 0.46 and 15% have a ratio of 0.87. The 0.46 value is the low tank-to-wheel efficiency of an ICE vehicle (0.17) divided by the high efficiency of an HFC vehicle (0.37). The 0.87 value is the high efficiency of an ICE vehicle (0.20) divided by the low efficiency of an HFC vehicle (0.23). 2% of BAU energy in the form of *oil* in the *transportation* sector is used to transport fossil fuels, biofuels, bioenergy, and uranium. That BAU energy is eliminated in a 100% WWS world. Of the remaining end-use fuel from oil used for transportation, 76% is replaced with electricity (the rest is replaced with electrolytic hydrogen). The 76% is multiplied by the electricity-to-fuel ratio for BE vehicles to determine the WWS electricity used for BE transportation replacing oil and 24% is multiplied by the electricity-to-fuel ratio for HFC transportation replacing oil.

<sup>g</sup>About 80% of *natural gas* energy in the transportation sector is used to transport fossil fuels, biofuels, bioenergy, and uranium (e.g., through pipelines or other means). That BAU energy is eliminated in a 100% WWS world. Of the remainder, 95% is electrified with BE vehicles and 5% is electrified with HFC vehicles.

<sup>h</sup>It is assumed that 100% of *biofuels and waste* currently used in transportation will be electrified in 2050 thus will have the electricity-to-fuel ratio of a BE vehicle.

**Table S4.** 1<sup>st</sup> row of each country: 2018 annually-averaged end-use load (GW) and percentage of the load by sector. 2<sup>nd</sup> row: projected 2050 annually-averaged end-use BAU load (GW) and percentage of the total load by sector. 3<sup>rd</sup> row: estimated 2050 total end-use load (GW) and percentage of total load by sector if 100% of end-use delivered BAU load in 2050 is instead provided by WWS. Column (k) shows the percentage reductions in total 2050 BAU load due to switching from BAU to WWS, including the effects of (h) energy use reduction due to the higher work to energy ratio of electricity over combustion, (i) eliminating energy use for the upstream mining, transporting, and/or refining of coal, oil, gas, biofuels, bioenergy, and uranium, and (j) policy-driven increases in end-use efficiency beyond those in the BAU case. Column (l) is the ratio of electricity load (=all energy load) in the 2050 WWS case to the electricity load in the 2050 BAU case. Whereas Column (l) shows that electricity consumption increases in the WWS versus BAU cases, Column (k) shows that all energy decreases.

| Country    | Scenario | (a)<br>Total<br>annual<br>average<br>end-use<br>load<br>(GW) | (b)<br>Resi-<br>den-<br>tial<br>% of<br>total<br>end-<br>use<br>load | (c)<br>Co-<br>m-<br>mer-<br>cial<br>% of<br>total<br>end-<br>use<br>load | (d)<br>Ind-<br>us-<br>try<br>% of<br>total<br>end-<br>use<br>load | (e)<br>Tra-<br>ns-<br>port<br>% of<br>total<br>end-<br>use<br>load | (f)<br>Ag-for-<br>fish %<br>of total<br>end-use<br>load | (g)<br>Mil-<br>itary-<br>other<br>% of<br>total<br>end-<br>use<br>load | (h)<br>%<br>chan-<br>ge<br>end-<br>use<br>load<br>with<br>WW<br>S due<br>to<br>highe-<br>r<br>work<br>:<br>energ-<br>y<br>ratio | (i)<br>%<br>chan-<br>ge<br>end-<br>use<br>load<br>with<br>WW<br>S due<br>to<br>elim-<br>inat-<br>ing up-<br>stream | (j)<br>%<br>chan-<br>ge<br>end-<br>use<br>load<br>w/WW<br>S due<br>to<br>effici-<br>ency<br>beyon-<br>d BAU | (k)<br>Over-<br>all<br>%<br>chan-<br>ge in<br>end-<br>use<br>load<br>with<br>WW<br>S | (l)<br>WW<br>S:B<br>AU<br>elec-<br>tricit-<br>y<br>load |
|------------|----------|--------------------------------------------------------------|----------------------------------------------------------------------|--------------------------------------------------------------------------|-------------------------------------------------------------------|--------------------------------------------------------------------|---------------------------------------------------------|------------------------------------------------------------------------|---------------------------------------------------------------------------------------------------------------------------------|--------------------------------------------------------------------------------------------------------------------|-------------------------------------------------------------------------------------------------------------|--------------------------------------------------------------------------------------|---------------------------------------------------------|
| Albania    | BAU 2018 | 3.0                                                          | 22.7                                                                 | 9.5                                                                      | 23.8                                                              | 38.7                                                               | 5.23                                                    | 0                                                                      |                                                                                                                                 |                                                                                                                    |                                                                                                             |                                                                                      |                                                         |
|            | BAU 2050 | 4.4                                                          | 27                                                                   | 11.7                                                                     | 20.5                                                              | 36.9                                                               | 3.97                                                    | 0                                                                      |                                                                                                                                 |                                                                                                                    |                                                                                                             |                                                                                      |                                                         |
|            | WWS 2050 | 2.1                                                          | 34.6                                                                 | 15.9                                                                     | 27.2                                                              | 20.2                                                               | 2.16                                                    | 0                                                                      | -39.3                                                                                                                           | -4.5                                                                                                               | -9                                                                                                          | -52.8                                                                                | 1.38                                                    |
| Algeria    | BAU 2018 | 58.0                                                         | 29.4                                                                 | 1.3                                                                      | 27.5                                                              | 36.6                                                               | 0.4                                                     | 4.81                                                                   |                                                                                                                                 |                                                                                                                    |                                                                                                             |                                                                                      |                                                         |
|            | BAU 2050 | 142.6                                                        | 21.7                                                                 | 1.1                                                                      | 21.3                                                              | 51.6                                                               | 0.34                                                    | 4.02                                                                   |                                                                                                                                 |                                                                                                                    |                                                                                                             |                                                                                      |                                                         |
|            | WWS 2050 | 43.3                                                         | 23.5                                                                 | 2.1                                                                      | 37.5                                                              | 31.3                                                               | 0.61                                                    | 4.92                                                                   | -44                                                                                                                             | -18.2                                                                                                              | -7.5                                                                                                        | -69.7                                                                                | 2.36                                                    |
| Angola     | BAU 2018 | 14.3                                                         | 54.2                                                                 | 5.1                                                                      | 13.1                                                              | 27.5                                                               | 0.06                                                    | 0.05                                                                   |                                                                                                                                 |                                                                                                                    |                                                                                                             |                                                                                      |                                                         |
|            | BAU 2050 | 24.5                                                         | 44.5                                                                 | 4.3                                                                      | 14.8                                                              | 36.2                                                               | 0.06                                                    | 0.05                                                                   |                                                                                                                                 |                                                                                                                    |                                                                                                             |                                                                                      |                                                         |
|            | WWS 2050 | 8.0                                                          | 41                                                                   | 2.5                                                                      | 26.9                                                              | 29.6                                                               | 0.04                                                    | 0.03                                                                   | -55.1                                                                                                                           | -4.2                                                                                                               | -8                                                                                                          | -67.4                                                                                | 2.51                                                    |
| Argentina  | BAU 2018 | 83.5                                                         | 22.4                                                                 | 7.4                                                                      | 33.1                                                              | 31.6                                                               | 5.53                                                    | 0                                                                      |                                                                                                                                 |                                                                                                                    |                                                                                                             |                                                                                      |                                                         |
|            | BAU 2050 | 144.4                                                        | 21.4                                                                 | 6.8                                                                      | 29.6                                                              | 38                                                                 | 4.18                                                    | 0                                                                      |                                                                                                                                 |                                                                                                                    |                                                                                                             |                                                                                      |                                                         |
|            | WWS 2050 | 51.0                                                         | 21.4                                                                 | 11.6                                                                     | 43.6                                                              | 20.9                                                               | 2.55                                                    | 0                                                                      | -40.8                                                                                                                           | -16.5                                                                                                              | -7.3                                                                                                        | -64.7                                                                                | 1.96                                                    |
| Armenia    | BAU 2018 | 3.0                                                          | 31.6                                                                 | 3                                                                        | 16                                                                | 34.6                                                               | 1.42                                                    | 13.44                                                                  |                                                                                                                                 |                                                                                                                    |                                                                                                             |                                                                                      |                                                         |
|            | BAU 2050 | 4.8                                                          | 32.6                                                                 | 3.2                                                                      | 12.5                                                              | 40.6                                                               | 1.02                                                    | 10.2                                                                   |                                                                                                                                 |                                                                                                                    |                                                                                                             |                                                                                      |                                                         |
|            | WWS 2050 | 1.5                                                          | 36.5                                                                 | 5.1                                                                      | 28.2                                                              | 14.8                                                               | 1.54                                                    | 13.96                                                                  | -39.7                                                                                                                           | -18.5                                                                                                              | -10                                                                                                         | -68.1                                                                                | 1.41                                                    |
| Australia  | BAU 2018 | 132.2                                                        | 10.6                                                                 | 8.3                                                                      | 39                                                                | 39.5                                                               | 2.65                                                    | 0                                                                      |                                                                                                                                 |                                                                                                                    |                                                                                                             |                                                                                      |                                                         |
|            | BAU 2050 | 208.8                                                        | 10.4                                                                 | 11.8                                                                     | 41.2                                                              | 34.5                                                               | 2.15                                                    | 0                                                                      |                                                                                                                                 |                                                                                                                    |                                                                                                             |                                                                                      |                                                         |
|            | WWS 2050 | 92.3                                                         | 12.5                                                                 | 19.1                                                                     | 46.1                                                              | 21.1                                                               | 1.26                                                    | 0                                                                      | -34.6                                                                                                                           | -14.8                                                                                                              | -6.4                                                                                                        | -55.8                                                                                | 1.58                                                    |
| Austria    | BAU 2018 | 37.7                                                         | 22.3                                                                 | 8.3                                                                      | 33.2                                                              | 34.3                                                               | 1.87                                                    | 0                                                                      |                                                                                                                                 |                                                                                                                    |                                                                                                             |                                                                                      |                                                         |
|            | BAU 2050 | 47.9                                                         | 21.6                                                                 | 8.7                                                                      | 30.3                                                              | 37.9                                                               | 1.54                                                    | 0                                                                      |                                                                                                                                 |                                                                                                                    |                                                                                                             |                                                                                      |                                                         |
|            | WWS 2050 | 20.6                                                         | 18.5                                                                 | 11.6                                                                     | 43.6                                                              | 25.3                                                               | 1.12                                                    | 0                                                                      | -39.1                                                                                                                           | -11.2                                                                                                              | -6.8                                                                                                        | -57                                                                                  | 1.68                                                    |
| Azerbaijan | BAU 2018 | 12.6                                                         | 34.7                                                                 | 6.9                                                                      | 23.3                                                              | 30                                                                 | 5.1                                                     | 0                                                                      |                                                                                                                                 |                                                                                                                    |                                                                                                             |                                                                                      |                                                         |
|            | BAU 2050 | 19.1                                                         | 37.4                                                                 | 9.3                                                                      | 21.5                                                              | 28                                                                 | 3.84                                                    | 0                                                                      |                                                                                                                                 |                                                                                                                    |                                                                                                             |                                                                                      |                                                         |
|            | WWS 2050 | 6.5                                                          | 35                                                                   | 18.9                                                                     | 19.9                                                              | 22.6                                                               | 3.59                                                    | 0                                                                      | -45.9                                                                                                                           | -10.7                                                                                                              | -9.4                                                                                                        | -66                                                                                  | 1.37                                                    |
| Bahrain    | BAU 2018 | 9.4                                                          | 11.5                                                                 | 7.4                                                                      | 54.4                                                              | 26.6                                                               | 0.07                                                    | 0                                                                      |                                                                                                                                 |                                                                                                                    |                                                                                                             |                                                                                      |                                                         |
|            | BAU 2050 | 17.6                                                         | 14.5                                                                 | 8.6                                                                      | 52.4                                                              | 24.4                                                               | 0.07                                                    | 0                                                                      |                                                                                                                                 |                                                                                                                    |                                                                                                             |                                                                                      |                                                         |
|            | WWS 2050 | 9.3                                                          | 20.3                                                                 | 12.7                                                                     | 54.6                                                              | 12.3                                                               | 0.1                                                     | 0                                                                      | -24.4                                                                                                                           | -15.6                                                                                                              | -7.1                                                                                                        | -47.1                                                                                | 1.32                                                    |
| Bangladesh | BAU 2018 | 42.8                                                         | 48.2                                                                 | 2.1                                                                      | 30.9                                                              | 14.6                                                               | 3.72                                                    | 0.42                                                                   |                                                                                                                                 |                                                                                                                    |                                                                                                             |                                                                                      |                                                         |
|            | BAU 2050 | 82.7                                                         | 38.1                                                                 | 2.5                                                                      | 31.9                                                              | 23.6                                                               | 3.51                                                    | 0.42                                                                   |                                                                                                                                 |                                                                                                                    |                                                                                                             |                                                                                      |                                                         |
|            | WWS 2050 | 35.8                                                         | 26.6                                                                 | 3.8                                                                      | 57.8                                                              | 9.2                                                                | 1.85                                                    | 0.75                                                                   | -39.7                                                                                                                           | -8.1                                                                                                               | -8.8                                                                                                        | -56.7                                                                                | 1.96                                                    |
| Belarus    | BAU 2018 | 25.8                                                         | 26.7                                                                 | 10.9                                                                     | 34.5                                                              | 22                                                                 | 5.92                                                    | 0                                                                      |                                                                                                                                 |                                                                                                                    |                                                                                                             |                                                                                      |                                                         |
|            | BAU 2050 | 37.5                                                         | 28.3                                                                 | 12.5                                                                     | 31.7                                                              | 22.7                                                               | 4.7                                                     | 0                                                                      |                                                                                                                                 |                                                                                                                    |                                                                                                             |                                                                                      |                                                         |

|                |          |         |      |      |      |      |      |      |       |       |       |       |      |
|----------------|----------|---------|------|------|------|------|------|------|-------|-------|-------|-------|------|
|                | WWS 2050 | 12.8    | 25.2 | 17.8 | 36.4 | 16.7 | 3.84 | 0    | -47.6 | -12.7 | -5.7  | -66   | 1.85 |
| Belgium        | BAU 2018 | 63.5    | 16.8 | 9.6  | 30.3 | 41.5 | 1.66 | 0.1  |       |       |       |       |      |
|                | BAU 2050 | 73.3    | 16.7 | 10.6 | 30.9 | 40.2 | 1.55 | 0.09 |       |       |       |       |      |
|                | WWS 2050 | 30.2    | 13.1 | 13.5 | 44.9 | 27.2 | 1.15 | 0.04 | -44.2 | -8    | -6.6  | -58.9 | 2.09 |
| Benin          | BAU 2018 | 5.9     | 37.7 | 8.2  | 1.8  | 51.9 | 0.45 | 0    |       |       |       |       |      |
|                | BAU 2050 | 11.0    | 26   | 9.2  | 2    | 62.5 | 0.48 | 0    |       |       |       |       |      |
|                | WWS 2050 | 2.9     | 19.9 | 10.1 | 6.1  | 63.4 | 0.53 | 0    | -66.5 | -1.2  | -6.1  | -73.8 | 8.01 |
| Bolivia        | BAU 2018 | 10.0    | 12.8 | 3.4  | 31.4 | 49.6 | 2.75 | 0    |       |       |       |       |      |
|                | BAU 2050 | 18.3    | 8.9  | 3.2  | 26.6 | 59.4 | 2.04 | 0    |       |       |       |       |      |
|                | WWS 2050 | 5.4     | 13.2 | 7.2  | 40.2 | 36.5 | 2.94 | 0    | -41.7 | -23.2 | -5.8  | -70.7 | 3.07 |
| Bosnia & Herz. | BAU 2018 | 6.2     | 37   | 7.5  | 27.9 | 26.7 | 0.9  | 0    |       |       |       |       |      |
|                | BAU 2050 | 9.0     | 38.6 | 9.1  | 25.6 | 26   | 0.69 | 0    |       |       |       |       |      |
|                | WWS 2050 | 3.7     | 37.3 | 13.7 | 31.4 | 17.1 | 0.47 | 0    | -41.7 | -9    | -8.4  | -59.1 | 1.33 |
| Botswana       | BAU 2018 | 2.8     | 32.5 | 4.8  | 17.2 | 43.5 | 1.44 | 0.58 |       |       |       |       |      |
|                | BAU 2050 | 5.4     | 24.8 | 6.1  | 17.1 | 49.9 | 1.5  | 0.62 |       |       |       |       |      |
|                | WWS 2050 | 2.2     | 21   | 10.8 | 31.6 | 33.5 | 1.96 | 1.14 | -50.5 | -2.2  | -7.6  | -60.3 | 2.08 |
| Brazil         | BAU 2018 | 325.6   | 10.8 | 5.2  | 42.4 | 36.2 | 5.03 | 0.37 |       |       |       |       |      |
|                | BAU 2050 | 591.3   | 8.8  | 5.1  | 42.1 | 38.8 | 4.83 | 0.33 |       |       |       |       |      |
|                | WWS 2050 | 271.9   | 10.8 | 8.2  | 56.8 | 19.9 | 3.68 | 0.72 | -37   | -11.5 | -5.5  | -54   | 2.14 |
| Brunei         | BAU 2018 | 2.7     | 7.7  | 7.6  | 56.5 | 26.7 | 0    | 1.48 |       |       |       |       |      |
|                | BAU 2050 | 5.2     | 8.2  | 10.3 | 48.2 | 31.9 | 0    | 1.38 |       |       |       |       |      |
|                | WWS 2050 | 1.6     | 18.6 | 27.1 | 24.8 | 28.6 | 0    | 0.94 | -35.8 | -29.5 | -5.1  | -70.3 | 1.49 |
| Bulgaria       | BAU 2018 | 14.8    | 20   | 10.2 | 34.8 | 33.4 | 1.67 | 0    |       |       |       |       |      |
|                | BAU 2050 | 22.4    | 23.1 | 13   | 30.3 | 32.3 | 1.27 | 0    |       |       |       |       |      |
|                | WWS 2050 | 10.0    | 27.1 | 19   | 35.1 | 17.9 | 0.78 | 0    | -36.3 | -11.3 | -7.6  | -55.1 | 1.32 |
| Cambodia       | BAU 2018 | 9.6     | 44.5 | 5.8  | 20.9 | 28.1 | 0    | 0.65 |       |       |       |       |      |
|                | BAU 2050 | 17.3    | 34.5 | 7    | 21.6 | 36.2 | 0    | 0.66 |       |       |       |       |      |
|                | WWS 2050 | 6.9     | 22.7 | 11.2 | 41.8 | 24   | 0    | 0.33 | -51.2 | -1.1  | -7.5  | -59.8 | 2.98 |
| Cameroon       | BAU 2018 | 9.9     | 64.5 | 15.2 | 5.9  | 12.9 | 0.07 | 1.44 |       |       |       |       |      |
|                | BAU 2050 | 15.8    | 52.7 | 19.4 | 7.5  | 18.3 | 0.09 | 1.88 |       |       |       |       |      |
|                | WWS 2050 | 4.4     | 39.6 | 16.2 | 22.1 | 17.5 | 0.25 | 4.3  | -63   | -0.9  | -8.2  | -72.1 | 2.41 |
| Canada         | BAU 2018 | 320.9   | 14.9 | 11   | 42.3 | 28.8 | 3    | 0.03 |       |       |       |       |      |
|                | BAU 2050 | 442.5   | 13.4 | 11.8 | 45.5 | 26.5 | 2.76 | 0.02 |       |       |       |       |      |
|                | WWS 2050 | 168.0   | 16.3 | 19.3 | 41.5 | 20.8 | 2.02 | 0.04 | -33.3 | -22.6 | -6.1  | -62   | 1.42 |
| Chile          | BAU 2018 | 38.8    | 15.8 | 6.5  | 39.7 | 35.2 | 2.51 | 0.2  |       |       |       |       |      |
|                | BAU 2050 | 67.5    | 14.7 | 10.3 | 38.9 | 33.4 | 2.37 | 0.22 |       |       |       |       |      |
|                | WWS 2050 | 35.2    | 12.4 | 11.4 | 56.9 | 17.2 | 1.78 | 0.42 | -36   | -4.8  | -7    | -47.9 | 1.78 |
| China          | BAU 2018 | 2,798.8 | 16.4 | 4.4  | 57.1 | 16.4 | 2.14 | 3.62 |       |       |       |       |      |
|                | BAU 2050 | 4,970.5 | 17.6 | 4.5  | 48.7 | 24.9 | 1.47 | 2.83 |       |       |       |       |      |
|                | WWS 2050 | 2,317.0 | 16.4 | 5.6  | 62   | 11.2 | 1.21 | 3.66 | -32.9 | -14.2 | -6.3  | -53.4 | 1.73 |
| Colombia       | BAU 2018 | 43.8    | 18.7 | 5    | 32.3 | 37.4 | 0.75 | 5.9  |       |       |       |       |      |
|                | BAU 2050 | 70.5    | 16.5 | 5.2  | 31.6 | 40.9 | 0.62 | 5.3  |       |       |       |       |      |
|                | WWS 2050 | 28.2    | 18.4 | 8.4  | 44.2 | 24.8 | 0.57 | 3.58 | -42.4 | -11   | -6.5  | -60   | 2.05 |
| Congo          | BAU 2018 | 2.7     | 57.4 | 13.8 | 5.5  | 23.3 | 0    | 0    |       |       |       |       |      |
|                | BAU 2050 | 4.6     | 45.4 | 17.7 | 6.2  | 30.7 | 0    | 0    |       |       |       |       |      |
|                | WWS 2050 | 1.4     | 37.4 | 22.7 | 12.3 | 27.6 | 0    | 0    | -60.1 | -2    | -8.3  | -70.4 | 2.29 |
| Congo, DR      | BAU 2018 | 26.0    | 90.2 | 0.1  | 4.4  | 4.2  | 1.03 | 0    |       |       |       |       |      |
|                | BAU 2050 | 35.8    | 84.4 | 0.3  | 6.7  | 6.9  | 1.64 | 0    |       |       |       |       |      |
|                | WWS 2050 | 8.5     | 67.9 | 1    | 22   | 7.8  | 1.28 | 0    | -65   | -0.6  | -10.6 | -76.2 | 3.70 |
| Costa Rica     | BAU 2018 | 5.5     | 11.3 | 9.6  | 23.7 | 52.9 | 1.82 | 0.65 |       |       |       |       |      |
|                | BAU 2050 | 8.6     | 11.6 | 10.6 | 20   | 55.6 | 1.57 | 0.56 |       |       |       |       |      |
|                | WWS 2050 | 4.0     | 16.8 | 16.2 | 33.4 | 31.7 | 1.46 | 0.41 | -44.7 | -1.5  | -7.2  | -53.3 | 1.95 |
| Côte d'Ivoire  | BAU 2018 | 10.0    | 59.3 | 9.6  | 9    | 20.8 | 1.33 | 0.01 |       |       |       |       |      |
|                | BAU 2050 | 16.6    | 46.9 | 12.7 | 10.6 | 28.2 | 1.59 | 0.02 |       |       |       |       |      |
|                | WWS 2050 | 5.2     | 35.2 | 16.3 | 23.1 | 23.8 | 1.57 | 0.04 | -58   | -2    | -8.5  | -68.4 | 2.45 |
| Croatia        | BAU 2018 | 10.0    | 30.4 | 10.8 | 24.7 | 31   | 3.11 | 0    |       |       |       |       |      |
|                | BAU 2050 | 14.8    | 31.9 | 14   | 22.1 | 29.6 | 2.37 | 0    |       |       |       |       |      |
|                | WWS 2050 | 5.9     | 30.9 | 22   | 25.6 | 20.1 | 1.35 | 0    | -43.4 | -8    | -8.5  | -59.9 | 1.51 |
| Cuba           | BAU 2018 | 11.0    | 15   | 3.3  | 55.6 | 14.1 | 2.56 | 9.41 |       |       |       |       |      |
|                | BAU 2050 | 15.8    | 16.4 | 4.1  | 52   | 16.6 | 2.35 | 8.55 |       |       |       |       |      |
|                | WWS 2050 | 9.0     | 18   | 5.4  | 63.8 | 8.6  | 1.16 | 3    | -31.8 | -4.9  | -6.2  | -42.9 | 2.48 |

|                 |          |       |      |      |      |      |      |      |       |       |       |       |       |
|-----------------|----------|-------|------|------|------|------|------|------|-------|-------|-------|-------|-------|
| Curacao         | BAU 2018 | 3.2   | 3.3  | 0.9  | 15.2 | 80.6 | 0    | 0    |       |       |       |       |       |
|                 | BAU 2050 | 5.2   | 2.4  | 1    | 14.1 | 82.6 | 0    | 0    |       |       |       |       |       |
|                 | WWS 2050 | 1.5   | 4.1  | 2.8  | 14   | 79.1 | 0    | 0    | -58.8 | -9.4  | -4.1  | -72.2 | 9.22  |
| Cyprus          | BAU 2018 | 2.8   | 15.2 | 11.2 | 11.9 | 58.8 | 2.06 | 0.8  |       |       |       |       |       |
|                 | BAU 2050 | 4.2   | 16.7 | 15.3 | 9.6  | 56.2 | 1.59 | 0.62 |       |       |       |       |       |
|                 | WWS 2050 | 1.9   | 25.2 | 24.5 | 15   | 33.2 | 1.44 | 0.66 | -44.7 | -2    | -8.3  | -54.9 | 1.62  |
| Czech Republic  | BAU 2018 | 35.8  | 25.6 | 11.5 | 34.3 | 26.1 | 2.29 | 0.15 |       |       |       |       |       |
|                 | BAU 2050 | 43.9  | 25.6 | 12.4 | 33.8 | 26.1 | 1.97 | 0.13 |       |       |       |       |       |
|                 | WWS 2050 | 18.0  | 20.1 | 16.5 | 42.8 | 19.2 | 1.35 | 0.06 | -41.2 | -11.2 | -6.7  | -59.1 | 1.56  |
| Denmark         | BAU 2018 | 21.9  | 26.7 | 12.1 | 20.4 | 36.5 | 4.29 | 0.03 |       |       |       |       |       |
|                 | BAU 2050 | 26.1  | 27.8 | 13.5 | 21.2 | 33.6 | 3.86 | 0.03 |       |       |       |       |       |
|                 | WWS 2050 | 9.8   | 24.9 | 20   | 27   | 24.8 | 3.37 | 0.01 | -47.5 | -8.2  | -6.6  | -62.3 | 1.74  |
| Dominican Rep.  | BAU 2018 | 9.1   | 21.3 | 6.7  | 25.5 | 44.1 | 2.36 | 0    |       |       |       |       |       |
|                 | BAU 2050 | 14.0  | 16.9 | 7.6  | 25.4 | 48   | 2.14 | 0    |       |       |       |       |       |
|                 | WWS 2050 | 6.5   | 16.8 | 11.5 | 41.5 | 27.6 | 2.56 | 0    | -43.6 | -2.9  | -7.3  | -53.9 | 1.93  |
| Ecuador         | BAU 2018 | 18.4  | 12.7 | 7.3  | 17.9 | 51.3 | 2.59 | 8.15 |       |       |       |       |       |
|                 | BAU 2050 | 28.0  | 10.3 | 7.7  | 16.9 | 55.9 | 2.22 | 7.05 |       |       |       |       |       |
|                 | WWS 2050 | 10.4  | 14   | 12.3 | 28.1 | 40.1 | 1.2  | 4.33 | -51.7 | -4.9  | -6.2  | -62.8 | 2.11  |
| Egypt           | BAU 2018 | 83.2  | 22.4 | 5.5  | 39.6 | 30.1 | 2.3  | 0.1  |       |       |       |       |       |
|                 | BAU 2050 | 186.8 | 19.5 | 7    | 34.1 | 37.3 | 2.07 | 0.08 |       |       |       |       |       |
|                 | WWS 2050 | 87.2  | 23.2 | 11.6 | 45.4 | 17.7 | 2.08 | 0.04 | -33.7 | -11.9 | -7.8  | -53.3 | 1.72  |
| El Salvador     | BAU 2018 | 3.7   | 20.9 | 5.7  | 23.5 | 48.6 | 0    | 1.29 |       |       |       |       |       |
|                 | BAU 2050 | 5.5   | 16.6 | 7    | 21.3 | 53.8 | 0    | 1.26 |       |       |       |       |       |
|                 | WWS 2050 | 2.5   | 16.5 | 11.8 | 37.5 | 32   | 0    | 2.2  | -46.2 | -1.4  | -7.5  | -55.2 | 1.98  |
| Equator. Guinea | BAU 2018 | 3.1   | 5.4  | 2.3  | 75.6 | 15.4 | 0    | 1.27 |       |       |       |       |       |
|                 | BAU 2050 | 6.6   | 4.3  | 2.5  | 75.4 | 16.7 | 0    | 1.2  |       |       |       |       |       |
|                 | WWS 2050 | 4.2   | 3.3  | 2.4  | 86.7 | 7    | 0    | 0.54 | -29.3 | -3.8  | -3.4  | -36.5 | 10.26 |
| Eritrea         | BAU 2018 | 0.7   | 73.1 | 7    | 3.5  | 16.3 | 0    | 0    |       |       |       |       |       |
|                 | BAU 2050 | 1.1   | 61.7 | 10   | 4.5  | 23.7 | 0    | 0    |       |       |       |       |       |
|                 | WWS 2050 | 0.3   | 49.6 | 15.1 | 12.6 | 22.7 | 0    | 0    | -61.7 | -0.8  | -9.6  | -72.1 | 2.33  |
| Estonia         | BAU 2018 | 4.8   | 25.8 | 13.4 | 24.3 | 32.8 | 3.42 | 0.3  |       |       |       |       |       |
|                 | BAU 2050 | 6.0   | 26.4 | 14.9 | 25.7 | 29.8 | 2.96 | 0.27 |       |       |       |       |       |
|                 | WWS 2050 | 2.1   | 23.6 | 24.5 | 26.9 | 22.2 | 2.24 | 0.6  | -45.1 | -12.8 | -6.7  | -64.6 | 1.32  |
| Ethiopia        | BAU 2018 | 55.0  | 86.7 | 1.4  | 3.7  | 7.3  | 0.45 | 0.45 |       |       |       |       |       |
|                 | BAU 2050 | 76.9  | 79.5 | 2.2  | 5.2  | 11.8 | 0.63 | 0.63 |       |       |       |       |       |
|                 | WWS 2050 | 18.1  | 63.8 | 4.4  | 17.3 | 13.3 | 0.54 | 0.54 | -66   | -0.2  | -10.2 | -76.4 | 6.39  |
| Finland         | BAU 2018 | 36.2  | 19   | 11.1 | 46.9 | 19.6 | 2.62 | 0.71 |       |       |       |       |       |
|                 | BAU 2050 | 42.6  | 21   | 13   | 44.3 | 18.8 | 2.35 | 0.65 |       |       |       |       |       |
|                 | WWS 2050 | 22.0  | 18.4 | 14.8 | 54.4 | 10.8 | 1.41 | 0.26 | -34.9 | -6.9  | -6.5  | -48.3 | 1.59  |
| France          | BAU 2018 | 204.6 | 23.9 | 15   | 23.6 | 34.4 | 2.85 | 0.34 |       |       |       |       |       |
|                 | BAU 2050 | 248.6 | 25   | 16.8 | 23.1 | 32.3 | 2.52 | 0.3  |       |       |       |       |       |
|                 | WWS 2050 | 111.3 | 24.2 | 21.8 | 30   | 22   | 1.71 | 0.18 | -40.3 | -6.3  | -8.6  | -55.2 | 1.34  |
| Gabon           | BAU 2018 | 6.1   | 27.9 | 0.9  | 65.8 | 5.2  | 0.09 | 0.11 |       |       |       |       |       |
|                 | BAU 2050 | 11.8  | 20   | 1.1  | 72.6 | 6.1  | 0.09 | 0.11 |       |       |       |       |       |
|                 | WWS 2050 | 7.3   | 9    | 1.1  | 87.1 | 2.7  | 0.1  | 0.06 | -31.1 | -4.1  | -3.5  | -38.6 | 10.41 |
| Georgia         | BAU 2018 | 5.6   | 29   | 12.1 | 19.8 | 34.5 | 0.64 | 3.9  |       |       |       |       |       |
|                 | BAU 2050 | 8.6   | 29.9 | 15.3 | 15.8 | 35.4 | 0.49 | 3.03 |       |       |       |       |       |
|                 | WWS 2050 | 3.6   | 23.1 | 23.1 | 29.5 | 18.1 | 0.44 | 5.62 | -40.1 | -7.7  | -10.2 | -57.9 | 1.47  |
| Germany         | BAU 2018 | 301.7 | 23.8 | 12.8 | 32   | 29.8 | 1.58 | 0.03 |       |       |       |       |       |
|                 | BAU 2050 | 361.0 | 23.7 | 13.8 | 31.4 | 29.7 | 1.39 | 0.03 |       |       |       |       |       |
|                 | WWS 2050 | 154.4 | 18.7 | 16.7 | 43.6 | 20.1 | 0.88 | 0.01 | -41.5 | -8.3  | -7.4  | -57.2 | 1.64  |
| Ghana           | BAU 2018 | 10.7  | 40.4 | 4.8  | 17.4 | 35.8 | 1.61 | 0    |       |       |       |       |       |
|                 | BAU 2050 | 20.7  | 32   | 6.1  | 18.3 | 41.9 | 1.63 | 0    |       |       |       |       |       |
|                 | WWS 2050 | 8.6   | 28.8 | 8.7  | 34.7 | 26.9 | 0.79 | 0    | -49.3 | -1.2  | -8    | -58.5 | 2.11  |
| Gibraltar       | BAU 2018 | 5.6   | 0    | 0.1  | 0.1  | 99.5 | 0    | 0.36 |       |       |       |       |       |
|                 | BAU 2050 | 6.0   | 0    | 0.1  | 0.1  | 99.4 | 0    | 0.37 |       |       |       |       |       |
|                 | WWS 2050 | 1.6   | 0    | 0.3  | 0.2  | 98.4 | 0    | 1.08 | -67.1 | -1.9  | -4.2  | -73.1 | 55.04 |
| Greece          | BAU 2018 | 26.8  | 19   | 9.1  | 23.9 | 45.4 | 1.39 | 1.14 |       |       |       |       |       |
|                 | BAU 2050 | 32.5  | 19.5 | 12.1 | 25.6 | 40.6 | 1.25 | 1.01 |       |       |       |       |       |
|                 | WWS 2050 | 13.2  | 24   | 21.5 | 25.3 | 26.7 | 1.91 | 0.5  | -40   | -12   | -7.5  | -59.4 | 1.43  |
| Guatemala       | BAU 2018 | 16.2  | 60.2 | 3.6  | 8.4  | 27.7 | 0    | 0    |       |       |       |       |       |



|                |          |        |      |      |      |      |      |       |       |       |      |       |       |
|----------------|----------|--------|------|------|------|------|------|-------|-------|-------|------|-------|-------|
|                | BAU 2050 | 20.2   | 49.7 | 4.3  | 9.4  | 36.7 | 0    | 0     |       |       |      |       |       |
|                | WWS 2050 | 6.1    | 36.7 | 8.6  | 22.1 | 32.5 | 0    | 0     | -59.6 | -1.8  | -8.6 | -69.9 | 2.80  |
| Haiti          | BAU 2018 | 4.6    | 74.7 | 1.6  | 8.8  | 14.9 | 0    | 0     |       |       |      |       |       |
|                | BAU 2050 | 5.1    | 66.4 | 1.5  | 10.3 | 21.9 | 0    | 0     |       |       |      |       |       |
|                | WWS 2050 | 1.3    | 46.2 | 1.4  | 30.1 | 22.2 | 0    | 0     | -64.4 | -0.5  | -8.9 | -73.8 | 15.64 |
| Honduras       | BAU 2018 | 6.0    | 40.9 | 9.4  | 15   | 32.9 | 1.72 | 0.09  |       |       |      |       |       |
|                | BAU 2050 | 8.2    | 33.1 | 10.2 | 14.8 | 40.1 | 1.66 | 0.08  |       |       |      |       |       |
|                | WWS 2050 | 3.1    | 25.4 | 14.3 | 31.4 | 28   | 0.87 | 0.04  | -53   | -0.8  | -8.1 | -61.8 | 2.25  |
| Hong Kong      | BAU 2018 | 36.0   | 4.9  | 10.7 | 8.2  | 76.2 | 0    | 0.03  |       |       |      |       |       |
|                | BAU 2050 | 82.6   | 4.7  | 11.6 | 6.6  | 77   | 0    | 0.02  |       |       |      |       |       |
|                | WWS 2050 | 30.5   | 8.5  | 23.1 | 12.8 | 55.5 | 0    | 0.03  | -54.6 | -2    | -6.5 | -63.1 | 2.29  |
| Hungary        | BAU 2018 | 25.9   | 29.8 | 10.8 | 30   | 26   | 3.29 | 0.19  |       |       |      |       |       |
|                | BAU 2050 | 31.7   | 30.1 | 10.9 | 29.1 | 26.8 | 2.87 | 0.17  |       |       |      |       |       |
|                | WWS 2050 | 12.6   | 22.6 | 13.6 | 41.7 | 19.6 | 2.33 | 0.12  | -43.6 | -9.2  | -7.6 | -60.4 | 1.75  |
| Iceland        | BAU 2018 | 5.0    | 13.5 | 13.7 | 42.1 | 23   | 7.43 | 0.27  |       |       |      |       |       |
|                | BAU 2050 | 5.6    | 14.4 | 14.6 | 41.5 | 22.2 | 7.01 | 0.26  |       |       |      |       |       |
|                | WWS 2050 | 3.2    | 9.1  | 13.4 | 62.3 | 11.3 | 3.88 | 0.11  | -34.6 | -2.1  | -5.9 | -42.6 | 1.22  |
| India          | BAU 2018 | 797.9  | 29   | 4.3  | 40.8 | 18.3 | 4.88 | 2.67  |       |       |      |       |       |
|                | BAU 2050 | 1870.8 | 20.3 | 4    | 40.5 | 28   | 4.55 | 2.65  |       |       |      |       |       |
|                | WWS 2050 | 926.7  | 16.3 | 3.9  | 58.5 | 14   | 5.14 | 2.11  | -37.4 | -6.4  | -6.7 | -50.5 | 2.34  |
| Indonesia      | BAU 2018 | 215.4  | 21.5 | 3.7  | 38.8 | 34.7 | 1.13 | 0.18  |       |       |      |       |       |
|                | BAU 2050 | 423.9  | 16.1 | 4.6  | 37.2 | 40.9 | 1.05 | 0.16  |       |       |      |       |       |
|                | WWS 2050 | 193.9  | 14.6 | 7.4  | 53.8 | 23.6 | 0.62 | 0.07  | -42.2 | -6.1  | -6   | -54.2 | 2.80  |
| Iran           | BAU 2018 | 253.8  | 27.9 | 5.8  | 35.7 | 26.3 | 4.09 | 0.22  |       |       |      |       |       |
|                | BAU 2050 | 444.0  | 24   | 5.1  | 38.3 | 28.1 | 4.35 | 0.24  |       |       |      |       |       |
|                | WWS 2050 | 184.9  | 17.5 | 5.8  | 56.8 | 14.9 | 4.58 | 0.45  | -39.8 | -11.2 | -7.3 | -58.4 | 2.80  |
| Iraq           | BAU 2018 | 36.7   | 19.5 | 0.8  | 32.2 | 44.2 | 0    | 3.36  |       |       |      |       |       |
|                | BAU 2050 | 62.1   | 17.9 | 1    | 32.5 | 44.9 | 0    | 3.69  |       |       |      |       |       |
|                | WWS 2050 | 24.0   | 26.1 | 2    | 33.7 | 30.9 | 0    | 7.33  | -41.2 | -13.8 | -6.3 | -61.3 | 2.06  |
| Ireland        | BAU 2018 | 16.7   | 21.7 | 11.6 | 22.7 | 42   | 1.97 | 0     |       |       |      |       |       |
|                | BAU 2050 | 18.9   | 21.2 | 13.3 | 22.6 | 40.9 | 1.88 | 0     |       |       |      |       |       |
|                | WWS 2050 | 8.1    | 19   | 16.7 | 38.2 | 24.7 | 1.39 | 0     | -45.3 | -4.2  | -7.7 | -57.1 | 1.77  |
| Israel         | BAU 2018 | 21.5   | 12.9 | 10.3 | 24.7 | 46   | 1.58 | 4.52  |       |       |      |       |       |
|                | BAU 2050 | 26.1   | 15.1 | 14.2 | 24.8 | 40.4 | 1.45 | 4.07  |       |       |      |       |       |
|                | WWS 2050 | 13.1   | 23.3 | 21.2 | 28   | 21.4 | 2.25 | 3.87  | -33.8 | -7.4  | -8.4 | -49.6 | 1.32  |
| Italy          | BAU 2018 | 168.4  | 25.2 | 13.3 | 25.8 | 33.2 | 2.39 | 0.09  |       |       |      |       |       |
|                | BAU 2050 | 215.7  | 24.1 | 13.9 | 24.5 | 35.5 | 2.01 | 0.07  |       |       |      |       |       |
|                | WWS 2050 | 83.9   | 18.7 | 20.3 | 33.9 | 25.4 | 1.61 | 0.04  | -42.2 | -11.1 | -7.8 | -61.1 | 1.52  |
| Jamaica        | BAU 2018 | 3.7    | 5.4  | 7.7  | 38.7 | 47.7 | 0.5  | 0     |       |       |      |       |       |
|                | BAU 2050 | 5.5    | 5.5  | 6.4  | 35   | 52.6 | 0.44 | 0     |       |       |      |       |       |
|                | WWS 2050 | 2.6    | 7.4  | 4.5  | 58.3 | 29.6 | 0.19 | 0     | -47.1 | -1    | -4.8 | -52.9 | 4.21  |
| Japan          | BAU 2018 | 370.8  | 15.2 | 17.4 | 36.1 | 29.5 | 1.66 | 0.19  |       |       |      |       |       |
|                | BAU 2050 | 355.4  | 15.9 | 19.1 | 34.4 | 29.2 | 1.24 | 0.17  |       |       |      |       |       |
|                | WWS 2050 | 174.5  | 16.9 | 22   | 42   | 18.3 | 0.61 | 0.07  | -34.6 | -8.5  | -7.7 | -50.9 | 1.42  |
| Jordan         | BAU 2018 | 9.1    | 21.3 | 7.3  | 13.9 | 50.2 | 3.4  | 3.87  |       |       |      |       |       |
|                | BAU 2050 | 15.8   | 21.1 | 7.3  | 14.5 | 49.6 | 3.64 | 3.84  |       |       |      |       |       |
|                | WWS 2050 | 7.1    | 30.6 | 10.5 | 21.6 | 29.3 | 6.3  | 1.71  | -43.4 | -3.3  | -8.2 | -54.9 | 1.56  |
| Kazakhstan     | BAU 2018 | 65.4   | 23.1 | 10.7 | 45.7 | 14   | 3.36 | 3.06  |       |       |      |       |       |
|                | BAU 2050 | 87.2   | 22.1 | 11.2 | 45.6 | 15.2 | 3    | 2.82  |       |       |      |       |       |
|                | WWS 2050 | 33.2   | 19.1 | 10.1 | 55.7 | 11.2 | 1.99 | 1.85  | -42   | -15   | -5   | -61.9 | 1.94  |
| Kenya          | BAU 2018 | 23.6   | 69.4 | 0.6  | 7.7  | 21.6 | 0.28 | 0.36  |       |       |      |       |       |
|                | BAU 2050 | 37.1   | 57.1 | 1.2  | 9.8  | 31.1 | 0.35 | 0.45  |       |       |      |       |       |
|                | WWS 2050 | 10.7   | 40.3 | 3.1  | 27.3 | 28.7 | 0.24 | 0.31  | -61.7 | -0.6  | -8.8 | -71.1 | 4.20  |
| Korea, DPR     | BAU 2018 | 6.9    | 3.1  | 0    | 52.1 | 8.9  | 0    | 35.95 |       |       |      |       |       |
|                | BAU 2050 | 13.3   | 1.9  | 0    | 51.7 | 10.7 | 0    | 35.7  |       |       |      |       |       |
|                | WWS 2050 | 7.3    | 0.6  | 0    | 71.3 | 5.2  | 0    | 22.9  | -37.5 | -2.3  | -5.4 | -45.2 | 2.58  |
| Korea, Rep. of | BAU 2018 | 217.4  | 13.1 | 13.1 | 40.8 | 30.5 | 1.6  | 0.81  |       |       |      |       |       |
|                | BAU 2050 | 304.9  | 11.4 | 15.2 | 42.5 | 28.8 | 1.49 | 0.66  |       |       |      |       |       |
|                | WWS 2050 | 151.3  | 8.6  | 20.5 | 54.3 | 14.6 | 1.68 | 0.27  | -33.5 | -9.6  | -7.3 | -50.4 | 1.44  |
| Kosovo         | BAU 2018 | 2.0    | 37.5 | 10.1 | 22   | 28.4 | 2.02 | 0     |       |       |      |       |       |
|                | BAU 2050 | 3.0    | 41.7 | 11.8 | 17.9 | 27.1 | 1.56 | 0     |       |       |      |       |       |

|                 |          |       |      |      |      |      |       |       |       |       |       |       |      |
|-----------------|----------|-------|------|------|------|------|-------|-------|-------|-------|-------|-------|------|
|                 | WWS 2050 | 1.4   | 42.8 | 15   | 25.3 | 15.6 | 1.33  | 0     | -40   | -3.5  | -10.2 | -53.6 | 1.24 |
| Kuwait          | BAU 2018 | 31.3  | 12.3 | 3.3  | 53.1 | 30.8 | 0.51  | 0     |       |       |       |       |      |
|                 | BAU 2050 | 57.4  | 16   | 4    | 50.7 | 28.9 | 0.52  | 0     |       |       |       |       |      |
|                 | WWS 2050 | 24.0  | 28.2 | 7.4  | 45.1 | 18.3 | 0.97  | 0     | -30.4 | -21.8 | -5.9  | -58.1 | 1.54 |
| Kyrgyzstan      | BAU 2018 | 5.5   | 62.8 | 7.6  | 15.8 | 12.3 | 0.63  | 0.94  |       |       |       |       |      |
|                 | BAU 2050 | 7.3   | 62.7 | 8.3  | 14.6 | 13.1 | 0.56  | 0.82  |       |       |       |       |      |
|                 | WWS 2050 | 3.4   | 61.2 | 7.9  | 21.9 | 7.5  | 0.74  | 0.73  | -40.3 | -1.6  | -11   | -52.9 | 1.21 |
| Lao PDR         | BAU 2018 | 4.2   | 40.3 | 12.1 | 13.3 | 34.2 | 0.06  | 0     |       |       |       |       |      |
|                 | BAU 2050 | 7.6   | 32.4 | 9.7  | 14   | 43.9 | 0.07  | 0     |       |       |       |       |      |
|                 | WWS 2050 | 2.9   | 25.9 | 12.2 | 31   | 30.8 | 0.14  | 0     | -53.4 | -0.8  | -7.8  | -62.1 | 2.06 |
| Latvia          | BAU 2018 | 5.7   | 28.5 | 13.7 | 23.1 | 30.2 | 4.35  | 0.14  |       |       |       |       |      |
|                 | BAU 2050 | 8.1   | 29.5 | 16.6 | 20.1 | 30.2 | 3.5   | 0.11  |       |       |       |       |      |
|                 | WWS 2050 | 3.3   | 22.7 | 21.7 | 33.1 | 20.3 | 2.21  | 0.05  | -50.5 | -2.6  | -6.8  | -59.9 | 2.07 |
| Lebanon         | BAU 2018 | 7.3   | 18.8 | 5.3  | 13.9 | 55.3 | 0     | 6.71  |       |       |       |       |      |
|                 | BAU 2050 | 13.2  | 20.3 | 6.3  | 14.3 | 52.5 | 0     | 6.74  |       |       |       |       |      |
|                 | WWS 2050 | 6.5   | 27.4 | 10   | 24.6 | 28.4 | 0     | 9.55  | -40.8 | -1    | -9.2  | -50.9 | 1.37 |
| Libya           | BAU 2018 | 14.4  | 13.4 | 1.5  | 25.3 | 55.3 | 1     | 3.45  |       |       |       |       |      |
|                 | BAU 2050 | 31.4  | 12.8 | 2    | 23.5 | 57.4 | 0.97  | 3.35  |       |       |       |       |      |
|                 | WWS 2050 | 14.0  | 18   | 3.5  | 36.6 | 34.3 | 1.7   | 5.87  | -45.8 | -3.2  | -6.5  | -55.5 | 2.55 |
| Lithuania       | BAU 2018 | 8.6   | 22.6 | 10   | 28.8 | 36.9 | 1.66  | 0.11  |       |       |       |       |      |
|                 | BAU 2050 | 12.6  | 23.7 | 12   | 26.7 | 36.2 | 1.33  | 0.08  |       |       |       |       |      |
|                 | WWS 2050 | 4.5   | 23.6 | 18.3 | 30.5 | 26.4 | 1.1   | 0.05  | -47.6 | -10.5 | -6    | -64   | 1.83 |
| Luxembourg      | BAU 2018 | 5.8   | 11.3 | 10.9 | 15.4 | 61.9 | 0.52  | 0     |       |       |       |       |      |
|                 | BAU 2050 | 6.5   | 11.5 | 12.3 | 15.6 | 60.1 | 0.5   | 0     |       |       |       |       |      |
|                 | WWS 2050 | 2.5   | 8.9  | 16.9 | 30.6 | 43.3 | 0.36  | 0     | -52.7 | -2.3  | -6.6  | -61.6 | 2.15 |
| Macedonia, Nor. | BAU 2018 | 2.5   | 25.6 | 11.2 | 24.1 | 38.1 | 1.06  | 0     |       |       |       |       |      |
|                 | BAU 2050 | 3.8   | 31.1 | 13.6 | 19.3 | 35.3 | 0.8   | 0     |       |       |       |       |      |
|                 | WWS 2050 | 1.9   | 35.9 | 17   | 27.6 | 18.7 | 0.72  | 0     | -37.4 | -2.6  | -9.7  | -49.7 | 1.29 |
| Malaysia        | BAU 2018 | 79.1  | 5.6  | 7.4  | 45   | 40.2 | 1.71  | 0     |       |       |       |       |      |
|                 | BAU 2050 | 169.0 | 5.4  | 8.7  | 40.3 | 44.1 | 1.46  | 0     |       |       |       |       |      |
|                 | WWS 2050 | 82.6  | 7.8  | 13.3 | 54.3 | 24   | 0.7   | 0     | -37.5 | -7.8  | -5.8  | -51.1 | 2.03 |
| Malta           | BAU 2018 | 3.8   | 3    | 4.2  | 2.1  | 90.4 | 0.24  | 0.07  |       |       |       |       |      |
|                 | BAU 2050 | 5.5   | 4.2  | 5.9  | 1.7  | 88   | 0.19  | 0.06  |       |       |       |       |      |
|                 | WWS 2050 | 1.8   | 9.5  | 12.9 | 4.3  | 73   | 0.17  | 0.14  | -60.5 | -1.8  | -5.6  | -67.9 | 3.12 |
| Mauritius       | BAU 2018 | 2.3   | 8    | 5.8  | 12   | 73.8 | 0.23  | 0.12  |       |       |       |       |      |
|                 | BAU 2050 | 5.1   | 7.5  | 6.7  | 10.9 | 74.5 | 0.21  | 0.11  |       |       |       |       |      |
|                 | WWS 2050 | 2.0   | 12.6 | 12.4 | 23.2 | 51.4 | 0.27  | 0.22  | -53.5 | -1.5  | -6.3  | -61.4 | 2.26 |
| Mexico          | BAU 2018 | 189.1 | 12.7 | 2.9  | 38.4 | 41   | 3.11  | 1.91  |       |       |       |       |      |
|                 | BAU 2050 | 312.5 | 12.6 | 4.8  | 38   | 39.5 | 3.06  | 2.1   |       |       |       |       |      |
|                 | WWS 2050 | 136.8 | 14.2 | 6.4  | 49.8 | 23.4 | 2.49  | 3.75  | -38.5 | -11.6 | -6.1  | -56.2 | 1.83 |
| Moldova, Rep.   | BAU 2018 | 4.3   | 43.3 | 8.9  | 20.1 | 23.7 | 3.55  | 0.44  |       |       |       |       |      |
|                 | BAU 2050 | 6.0   | 44.1 | 10.9 | 17.6 | 24.2 | 2.83  | 0.37  |       |       |       |       |      |
|                 | WWS 2050 | 2.3   | 34.4 | 15   | 31.9 | 16.6 | 1.82  | 0.22  | -50.2 | -2.4  | -8.9  | -61.4 | 1.88 |
| Mongolia        | BAU 2018 | 5.4   | 25.2 | 7.9  | 33.6 | 18.7 | 2.21  | 12.3  |       |       |       |       |      |
|                 | BAU 2050 | 9.9   | 19.9 | 6.3  | 35   | 23.5 | 2.24  | 13.04 |       |       |       |       |      |
|                 | WWS 2050 | 4.0   | 16.9 | 3.9  | 53.1 | 15.4 | 1.35  | 9.29  | -52.5 | -3.4  | -3.7  | -59.6 | 2.38 |
| Montenegro      | BAU 2018 | 1.0   | 32.4 | 11.5 | 19.5 | 35.9 | 0.65  | 0     |       |       |       |       |      |
|                 | BAU 2050 | 1.6   | 36.6 | 15   | 15   | 32.9 | 0.48  | 0     |       |       |       |       |      |
|                 | WWS 2050 | 0.8   | 38.4 | 21   | 22.5 | 17.8 | 0.31  | 0     | -37   | -1.9  | -10.9 | -49.8 | 1.17 |
| Morocco         | BAU 2018 | 22.3  | 24.1 | 7.7  | 20   | 40.9 | 7.27  | 0     |       |       |       |       |      |
|                 | BAU 2050 | 44.6  | 17.6 | 8.7  | 20.2 | 46.3 | 7.25  | 0     |       |       |       |       |      |
|                 | WWS 2050 | 19.4  | 18.7 | 9.4  | 37.5 | 28.7 | 5.76  | 0     | -48.3 | -0.9  | -7.2  | -56.4 | 2.04 |
| Mozambique      | BAU 2018 | 6.8   | 37.7 | 14.7 | 23.9 | 22.9 | 0.08  | 0.78  |       |       |       |       |      |
|                 | BAU 2050 | 12.7  | 28   | 16   | 26.5 | 28.4 | 0.09  | 0.88  |       |       |       |       |      |
|                 | WWS 2050 | 5.3   | 17.4 | 9.1  | 54.2 | 17.7 | 0.1   | 1.64  | -49.4 | -1.5  | -7    | -57.9 | 1.63 |
| Myanmar         | BAU 2018 | 26.9  | 55.5 | 3.7  | 20.8 | 10.7 | 6.57  | 2.69  |       |       |       |       |      |
|                 | BAU 2050 | 44.7  | 45.9 | 4.2  | 23.1 | 16.7 | 7.17  | 2.95  |       |       |       |       |      |
|                 | WWS 2050 | 15.8  | 30.8 | 6.2  | 46.4 | 10.7 | 4.08  | 1.78  | -52.3 | -4.3  | -8    | -64.7 | 3.25 |
| Namibia         | BAU 2018 | 2.5   | 9.1  | 0.1  | 9.9  | 39.4 | 18.79 | 22.74 |       |       |       |       |      |
|                 | BAU 2050 | 5.1   | 5.6  | 0.1  | 9.8  | 43.5 | 17.96 | 23    |       |       |       |       |      |
|                 | WWS 2050 | 2.0   | 2.5  | 0    | 20.5 | 29.9 | 9.3   | 37.73 | -53.4 | -0.8  | -7.1  | -61.2 | 1.97 |

|              |          |       |      |      |      |      |      |      |       |       |      |       |      |
|--------------|----------|-------|------|------|------|------|------|------|-------|-------|------|-------|------|
| Nepal        | BAU 2018 | 18.7  | 73.5 | 2.6  | 8.1  | 13.5 | 2.17 | 0.18 |       |       |      |       |      |
|              | BAU 2050 | 28.5  | 63.8 | 2.6  | 10.2 | 20.5 | 2.6  | 0.23 |       |       |      |       |      |
|              | WWS 2050 | 8.0   | 45.6 | 3.4  | 28.7 | 19.5 | 2.14 | 0.63 | -62.3 | -0.4  | -9.2 | -71.9 | 4.79 |
| Netherlands  | BAU 2018 | 88.4  | 14.4 | 10.2 | 30.8 | 38.9 | 5.69 | 0.1  |       |       |      |       |      |
|              | BAU 2050 | 104.5 | 15   | 11.5 | 31.6 | 36.6 | 5.23 | 0.09 |       |       |      |       |      |
|              | WWS 2050 | 40.9  | 12.2 | 16.3 | 40.8 | 26.2 | 4.56 | 0.05 | -44.3 | -10   | -6.6 | -60.9 | 2.06 |
| New Zealand  | BAU 2018 | 20.7  | 9.5  | 7.7  | 33.5 | 44.7 | 4.3  | 0.28 |       |       |      |       |      |
|              | BAU 2050 | 32.4  | 10   | 10.6 | 36.9 | 38   | 4.12 | 0.33 |       |       |      |       |      |
|              | WWS 2050 | 17.0  | 12.6 | 14.5 | 49.6 | 19.4 | 3.48 | 0.49 | -35.5 | -5.2  | -6.9 | -47.6 | 1.78 |
| Nicaragua    | BAU 2018 | 3.5   | 42.5 | 11.1 | 15.8 | 28.1 | 2.06 | 0.41 |       |       |      |       |      |
|              | BAU 2050 | 4.7   | 34.4 | 11.7 | 16.4 | 34.9 | 2.05 | 0.45 |       |       |      |       |      |
|              | WWS 2050 | 1.7   | 26.4 | 14.8 | 30.1 | 26   | 1.84 | 0.98 | -52.8 | -3.4  | -8   | -64.2 | 2.07 |
| Niger        | BAU 2018 | 4.2   | 78.4 | 1.4  | 4    | 16.1 | 0.03 | 0    |       |       |      |       |      |
|              | BAU 2050 | 6.3   | 68.5 | 2    | 5.2  | 24.2 | 0.04 | 0    |       |       |      |       |      |
|              | WWS 2050 | 1.6   | 56.8 | 3.3  | 14.8 | 24.9 | 0.13 | 0    | -63.6 | -0.9  | -9.6 | -74.1 | 3.53 |
| Nigeria      | BAU 2018 | 193.2 | 72.6 | 2.3  | 8.7  | 16.3 | 0    | 0.12 |       |       |      |       |      |
|              | BAU 2050 | 294.0 | 61.3 | 3.3  | 11   | 24.2 | 0    | 0.15 |       |       |      |       |      |
|              | WWS 2050 | 74.1  | 46.9 | 4.4  | 23   | 25.5 | 0    | 0.12 | -62.8 | -3.6  | -8.3 | -74.8 | 8.44 |
| Norway       | BAU 2018 | 34.0  | 16.1 | 11.5 | 49.5 | 21   | 1.73 | 0.2  |       |       |      |       |      |
|              | BAU 2050 | 47.3  | 16.8 | 12.7 | 48   | 21   | 1.35 | 0.16 |       |       |      |       |      |
|              | WWS 2050 | 20.3  | 26.9 | 20.3 | 39   | 12.4 | 1.39 | 0.07 | -23.6 | -25.8 | -7.5 | -57   | 0.99 |
| Oman         | BAU 2018 | 35.2  | 5.9  | 27.2 | 37.9 | 25.8 | 0.17 | 3.04 |       |       |      |       |      |
|              | BAU 2050 | 59.9  | 8    | 21.6 | 41   | 26.1 | 0.19 | 3.11 |       |       |      |       |      |
|              | WWS 2050 | 25.5  | 13.7 | 17.2 | 51   | 16.3 | 0.34 | 1.46 | -41.3 | -11.6 | -4.5 | -57.4 | 2.86 |
| Pakistan     | BAU 2018 | 124.3 | 46.6 | 3.3  | 27.1 | 21.6 | 1.07 | 0.33 |       |       |      |       |      |
|              | BAU 2050 | 233.1 | 36.8 | 3.5  | 28.3 | 30   | 1.12 | 0.32 |       |       |      |       |      |
|              | WWS 2050 | 97.6  | 25.5 | 4.8  | 51.4 | 16.1 | 2.06 | 0.15 | -45.1 | -5    | -8   | -58.1 | 3.00 |
| Panama       | BAU 2018 | 11.5  | 6.6  | 6.2  | 9    | 78.1 | 0.15 | 0.01 |       |       |      |       |      |
|              | BAU 2050 | 18.5  | 5.5  | 6.8  | 7.4  | 80.1 | 0.12 | 0.01 |       |       |      |       |      |
|              | WWS 2050 | 6.5   | 8.6  | 14.1 | 16.2 | 61   | 0.07 | 0.02 | -57.6 | -1.6  | -5.8 | -65   | 3.27 |
| Paraguay     | BAU 2018 | 8.8   | 26.7 | 6.2  | 25.7 | 41.4 | 0    | 0    |       |       |      |       |      |
|              | BAU 2050 | 12.9  | 22.4 | 7.8  | 23   | 46.7 | 0    | 0    |       |       |      |       |      |
|              | WWS 2050 | 5.9   | 20.5 | 13.3 | 39.2 | 27   | 0    | 0    | -45.8 | -1.4  | -7.3 | -54.5 | 2.19 |
| Peru         | BAU 2018 | 29.4  | 17.8 | 6.2  | 30.9 | 44   | 1.01 | 0    |       |       |      |       |      |
|              | BAU 2050 | 47.4  | 13   | 6    | 28.8 | 51.3 | 0.88 | 0    |       |       |      |       |      |
|              | WWS 2050 | 19.0  | 12.5 | 8.8  | 49   | 28.5 | 1.22 | 0    | -42.1 | -11.4 | -6.3 | -59.9 | 2.09 |
| Philippines  | BAU 2018 | 47.2  | 21.2 | 13.1 | 25   | 39.4 | 1.24 | 0    |       |       |      |       |      |
|              | BAU 2050 | 93.9  | 17   | 12.5 | 23.4 | 45.9 | 1.18 | 0    |       |       |      |       |      |
|              | WWS 2050 | 41.8  | 17.7 | 15.5 | 38   | 27.4 | 1.35 | 0    | -45   | -3.1  | -7.4 | -55.5 | 1.79 |
| Poland       | BAU 2018 | 103.8 | 25   | 10.2 | 29.5 | 30.3 | 5.04 | 0    |       |       |      |       |      |
|              | BAU 2050 | 126.7 | 22.9 | 11.6 | 29.3 | 31.8 | 4.36 | 0    |       |       |      |       |      |
|              | WWS 2050 | 48.0  | 18.1 | 18.1 | 39.3 | 21.9 | 2.58 | 0    | -43.8 | -12.4 | -5.9 | -62.1 | 1.67 |
| Portugal     | BAU 2018 | 25.2  | 14   | 10.4 | 31.1 | 42   | 2.43 | 0.14 |       |       |      |       |      |
|              | BAU 2050 | 30.2  | 15.1 | 13.3 | 30.7 | 38.6 | 2.19 | 0.12 |       |       |      |       |      |
|              | WWS 2050 | 13.6  | 16.2 | 20.4 | 38.2 | 23.6 | 1.57 | 0.05 | -39   | -8.8  | -7.1 | -54.9 | 1.59 |
| Qatar        | BAU 2018 | 44.1  | 5.7  | 2.2  | 70.1 | 20.9 | 0    | 1.07 |       |       |      |       |      |
|              | BAU 2050 | 78.8  | 7.8  | 2.7  | 68.3 | 20.1 | 0    | 1.12 |       |       |      |       |      |
|              | WWS 2050 | 30.9  | 14.8 | 5.3  | 64   | 13.7 | 0    | 2.23 | -27.7 | -29.1 | -4.1 | -60.8 | 2.55 |
| Romania      | BAU 2018 | 34.1  | 30.1 | 7.7  | 34.1 | 25.2 | 2.2  | 0.82 |       |       |      |       |      |
|              | BAU 2050 | 48.4  | 31.9 | 9.2  | 31.3 | 25.1 | 1.79 | 0.65 |       |       |      |       |      |
|              | WWS 2050 | 18.8  | 25.6 | 11.9 | 43.2 | 17.7 | 1.23 | 0.34 | -44.9 | -9    | -7.3 | -61.2 | 1.76 |
| Russia       | BAU 2018 | 683.1 | 28.8 | 7.2  | 39.1 | 23   | 1.86 | 0    |       |       |      |       |      |
|              | BAU 2050 | 779.2 | 27.5 | 7.3  | 36.6 | 27.1 | 1.39 | 0    |       |       |      |       |      |
|              | WWS 2050 | 251.0 | 25.9 | 11.3 | 45.2 | 16.3 | 1.37 | 0    | -42.3 | -19.2 | -6.3 | -67.8 | 1.63 |
| Saudi Arabia | BAU 2018 | 188.4 | 9.2  | 7.7  | 45.7 | 37   | 0.3  | 0.03 |       |       |      |       |      |
|              | BAU 2050 | 349.0 | 11.6 | 9.1  | 44.6 | 34.4 | 0.3  | 0.03 |       |       |      |       |      |
|              | WWS 2050 | 185.2 | 16   | 13.4 | 52.9 | 17.3 | 0.44 | 0.04 | -32.4 | -8    | -6.6 | -46.9 | 2.17 |
| Senegal      | BAU 2018 | 3.7   | 39.9 | 6.4  | 15   | 37   | 0.36 | 1.3  |       |       |      |       |      |
|              | BAU 2050 | 6.9   | 29.2 | 8.1  | 16   | 44.8 | 0.41 | 1.47 |       |       |      |       |      |
|              | WWS 2050 | 2.7   | 21   | 13.3 | 31.4 | 30.5 | 0.81 | 2.92 | -51.4 | -1.4  | -8.1 | -60.9 | 2.26 |
| Serbia       | BAU 2018 | 12.5  | 30   | 9.4  | 34.6 | 24.1 | 1.8  | 0    |       |       |      |       |      |

|                 |          |       |      |      |      |      |      |       |       |       |       |       |      |
|-----------------|----------|-------|------|------|------|------|------|-------|-------|-------|-------|-------|------|
|                 | BAU 2050 | 18.8  | 34.6 | 11.2 | 30   | 22.8 | 1.37 | 0     |       |       |       |       |      |
|                 | WWS 2050 | 8.8   | 38   | 13.7 | 33.9 | 13.4 | 0.93 | 0     | -36.4 | -8.5  | -8.4  | -53.3 | 1.25 |
| Singapore       | BAU 2018 | 95.4  | 1    | 2.6  | 13.9 | 82.4 | 0    | 0.04  |       |       |       |       |      |
|                 | BAU 2050 | 216.6 | 1    | 2.9  | 11.2 | 84.8 | 0    | 0.03  |       |       |       |       |      |
|                 | WWS 2050 | 72.5  | 2.1  | 6.6  | 21.5 | 69.7 | 0    | 0.07  | -58.4 | -3.6  | -4.5  | -66.5 | 4.78 |
| Slovak Republic | BAU 2018 | 15.3  | 17.8 | 11.4 | 45.2 | 24.4 | 1.16 | 0     |       |       |       |       |      |
|                 | BAU 2050 | 20.0  | 16.8 | 11.7 | 42   | 28.6 | 0.94 | 0     |       |       |       |       |      |
|                 | WWS 2050 | 8.2   | 13.8 | 15.8 | 53.4 | 16.3 | 0.68 | 0     | -34.8 | -17.7 | -6.3  | -58.8 | 1.70 |
| Slovenia        | BAU 2018 | 7.1   | 20   | 8    | 28.4 | 41.7 | 1.37 | 0.45  |       |       |       |       |      |
|                 | BAU 2050 | 8.3   | 21.7 | 10   | 27.2 | 39.3 | 1.25 | 0.41  |       |       |       |       |      |
|                 | WWS 2050 | 3.9   | 18.6 | 14.3 | 42.2 | 24.1 | 0.61 | 0.18  | -42   | -3.5  | -7.4  | -53   | 1.62 |
| South Africa    | BAU 2018 | 117.6 | 15.1 | 6.9  | 48.1 | 26.2 | 2.55 | 1.21  |       |       |       |       |      |
|                 | BAU 2050 | 234.2 | 12.9 | 8.4  | 45.2 | 29.7 | 2.56 | 1.21  |       |       |       |       |      |
|                 | WWS 2050 | 105.0 | 14.8 | 10.4 | 53.6 | 18.3 | 1.95 | 0.92  | -35.7 | -13.9 | -5.5  | -55.2 | 1.65 |
| South Sudan     | BAU 2018 | 0.7   | 27.8 | 2.1  | 19   | 47.2 | 3.92 | 0     |       |       |       |       |      |
|                 | BAU 2050 | 1.4   | 21.4 | 2.1  | 17   | 55.5 | 4.05 | 0     |       |       |       |       |      |
|                 | WWS 2050 | 0.4   | 25   | 2.6  | 15.3 | 52.4 | 4.57 | 0     | -55.2 | -10.9 | -5.7  | -71.8 | 2.89 |
| Spain           | BAU 2018 | 136.5 | 14.4 | 10.5 | 29.5 | 42.6 | 2.66 | 0.31  |       |       |       |       |      |
|                 | BAU 2050 | 166.0 | 15.1 | 12.2 | 30.4 | 39.6 | 2.35 | 0.28  |       |       |       |       |      |
|                 | WWS 2050 | 68.8  | 17.8 | 18.4 | 35.3 | 26.5 | 1.67 | 0.28  | -39.6 | -12.1 | -6.8  | -58.6 | 1.57 |
| Sri Lanka       | BAU 2018 | 14.8  | 29.8 | 4.6  | 24   | 39.7 | 0    | 1.92  |       |       |       |       |      |
|                 | BAU 2050 | 28.6  | 22.1 | 5    | 23.3 | 47.7 | 0    | 1.81  |       |       |       |       |      |
|                 | WWS 2050 | 11.9  | 17.1 | 7.9  | 43.6 | 30.4 | 0    | 0.87  | -50.4 | -1.4  | -6.4  | -58.2 | 3.07 |
| Sudan           | BAU 2018 | 17.2  | 43.5 | 13.7 | 11.3 | 29.4 | 1.51 | 0.56  |       |       |       |       |      |
|                 | BAU 2050 | 32.0  | 34.3 | 15.2 | 12.6 | 35.6 | 1.65 | 0.59  |       |       |       |       |      |
|                 | WWS 2050 | 11.4  | 31.2 | 12.7 | 26.7 | 26.6 | 2.55 | 0.33  | -55.9 | -1.1  | -7.3  | -64.3 | 2.59 |
| Suriname        | BAU 2018 | 0.8   | 17.2 | 7.9  | 15.7 | 42.3 | 16.5 | 0.34  |       |       |       |       |      |
|                 | BAU 2050 | 1.2   | 16   | 9    | 14.8 | 45.8 | 14.1 | 0.32  |       |       |       |       |      |
|                 | WWS 2050 | 0.5   | 22.6 | 15   | 25.3 | 29.6 | 6.89 | 0.61  | -47.7 | -3.4  | -7.7  | -58.8 | 1.46 |
| Sweden          | BAU 2018 | 45.9  | 21.7 | 11.9 | 35.9 | 28.6 | 1.89 | 0     |       |       |       |       |      |
|                 | BAU 2050 | 55.4  | 24   | 14.1 | 32.6 | 27.7 | 1.63 | 0     |       |       |       |       |      |
|                 | WWS 2050 | 29.9  | 24.1 | 16.2 | 42.7 | 16.1 | 0.89 | 0     | -33.9 | -4.6  | -7.6  | -46.1 | 1.33 |
| Switzerland     | BAU 2018 | 26.5  | 25.3 | 15.9 | 19.5 | 37.8 | 0.53 | 1.03  |       |       |       |       |      |
|                 | BAU 2050 | 32.1  | 24.9 | 17.5 | 18.4 | 37.9 | 0.48 | 0.92  |       |       |       |       |      |
|                 | WWS 2050 | 15.0  | 22.6 | 20.7 | 27.1 | 28.6 | 0.68 | 0.39  | -40.9 | -3.7  | -8.6  | -53.2 | 1.35 |
| Syria           | BAU 2018 | 8.5   | 21.3 | 4.3  | 28.6 | 39.1 | 3.59 | 3.15  |       |       |       |       |      |
|                 | BAU 2050 | 14.4  | 19.1 | 4.1  | 29.8 | 39.9 | 3.67 | 3.36  |       |       |       |       |      |
|                 | WWS 2050 | 6.4   | 23.7 | 4.9  | 41.9 | 23.8 | 1.65 | 4.1   | -41.6 | -6.4  | -7.2  | -55.3 | 1.73 |
| Taiwan          | BAU 2018 | 80.4  | 9.6  | 8.4  | 53.4 | 26.7 | 1.03 | 0.81  |       |       |       |       |      |
|                 | BAU 2050 | 165.3 | 9.5  | 9.3  | 49   | 30.5 | 0.94 | 0.76  |       |       |       |       |      |
|                 | WWS 2050 | 90.7  | 11.6 | 11.7 | 59.4 | 15.7 | 0.77 | 0.82  | -30.5 | -7.7  | -6.9  | -45.1 | 1.40 |
| Tajikistan      | BAU 2018 | 3.9   | 27.6 | 7.7  | 29.1 | 14.9 | 6.55 | 14.22 |       |       |       |       |      |
|                 | BAU 2050 | 5.8   | 33.9 | 11.7 | 24.1 | 14.3 | 5.29 | 10.71 |       |       |       |       |      |
|                 | WWS 2050 | 3.5   | 36.2 | 15.1 | 31.8 | 6.4  | 6.89 | 3.59  | -28.1 | -1.1  | -10.9 | -40.1 | 1.13 |
| Tanzania        | BAU 2018 | 24.2  | 69.6 | 0.8  | 10.9 | 11   | 5.05 | 2.61  |       |       |       |       |      |
|                 | BAU 2050 | 38.1  | 57.3 | 1.4  | 14.8 | 15.8 | 7.03 | 3.65  |       |       |       |       |      |
|                 | WWS 2050 | 11.6  | 37.7 | 3.5  | 38.1 | 13.8 | 4.51 | 2.4   | -60.5 | -0.3  | -8.7  | -69.5 | 5.90 |
| Thailand        | BAU 2018 | 122.3 | 10.1 | 5.3  | 44.2 | 36.6 | 3.15 | 0.7   |       |       |       |       |      |
|                 | BAU 2050 | 257.5 | 8.1  | 6.1  | 38.9 | 43.5 | 2.72 | 0.65  |       |       |       |       |      |
|                 | WWS 2050 | 118.4 | 9.3  | 9.5  | 56.5 | 22.4 | 1.23 | 1.09  | -38.4 | -10   | -5.7  | -54   | 2.43 |
| Togo            | BAU 2018 | 2.8   | 66.5 | 10.1 | 4.6  | 18.9 | 0    | 0     |       |       |       |       |      |
|                 | BAU 2050 | 4.5   | 54.4 | 13   | 5.9  | 26.7 | 0    | 0     |       |       |       |       |      |
|                 | WWS 2050 | 1.2   | 42.7 | 12.7 | 18.3 | 26.4 | 0    | 0     | -64.1 | -0.5  | -8.4  | -73   | 3.34 |
| Trinidad & Tob. | BAU 2018 | 9.6   | 5    | 1.2  | 73.8 | 20   | 0    | 0     |       |       |       |       |      |
|                 | BAU 2050 | 15.4  | 5    | 1.3  | 73   | 20.7 | 0    | 0     |       |       |       |       |      |
|                 | WWS 2050 | 5.0   | 9    | 3.1  | 70.8 | 17.1 | 0    | 0     | -30.3 | -34.4 | -3.1  | -67.8 | 3.02 |
| Tunisia         | BAU 2018 | 11.6  | 24.9 | 8    | 28.2 | 32.9 | 6.02 | 0     |       |       |       |       |      |
|                 | BAU 2050 | 30.0  | 15.1 | 6.8  | 21.8 | 51.6 | 4.62 | 0     |       |       |       |       |      |
|                 | WWS 2050 | 10.8  | 17.4 | 11.6 | 44.3 | 22.7 | 4.06 | 0     | -38.9 | -17.7 | -7.3  | -64   | 2.15 |
| Turkey          | BAU 2018 | 144.6 | 18.9 | 11.5 | 35.5 | 30   | 4.16 | 0     |       |       |       |       |      |
|                 | BAU 2050 | 173.7 | 19.3 | 12.9 | 34.2 | 29.9 | 3.69 | 0     |       |       |       |       |      |

|                 |          |          |      |      |      |      |      |       |       |       |       |       |      |
|-----------------|----------|----------|------|------|------|------|------|-------|-------|-------|-------|-------|------|
|                 | WWS 2050 | 80.6     | 17.2 | 16.2 | 47.3 | 16   | 3.24 | 0     | -37.8 | -8.6  | -7.2  | -53.6 | 1.84 |
| Turkmenistan    | BAU 2018 | 28.0     | 1.8  | 34   | 18.6 | 22.8 | 1.62 | 21.06 |       |       |       |       |      |
|                 | BAU 2050 | 40.0     | 2.2  | 33.5 | 19.1 | 27   | 1.35 | 16.75 |       |       |       |       |      |
|                 | WWS 2050 | 8.7      | 6.6  | 30.8 | 20.8 | 20.7 | 4.82 | 16.37 | -55.9 | -18.8 | -3.4  | -78.1 | 3.14 |
| Ukraine         | BAU 2018 | 71.1     | 31.1 | 8    | 39.1 | 18.3 | 3.53 | 0     |       |       |       |       |      |
|                 | BAU 2050 | 104.2    | 33.9 | 9.5  | 34.7 | 19.1 | 2.77 | 0     |       |       |       |       |      |
|                 | WWS 2050 | 42.1     | 28.7 | 12.1 | 44.9 | 12.2 | 2.14 | 0     | -41.5 | -10.2 | -7.9  | -59.6 | 1.58 |
| United Arab Em. | BAU 2018 | 108.5    | 4.6  | 4.2  | 43.5 | 44.6 | 0    | 3.08  |       |       |       |       |      |
|                 | BAU 2050 | 205.6    | 6    | 4.8  | 45.7 | 40.5 | 0    | 3.02  |       |       |       |       |      |
|                 | WWS 2050 | 113.7    | 8.1  | 6.8  | 61.4 | 19.5 | 0    | 4.21  | -37   | -2.2  | -5.5  | -44.7 | 3.58 |
| United Kingdom  | BAU 2018 | 195.3    | 25.8 | 11.6 | 22.9 | 37.8 | 1.01 | 0.84  |       |       |       |       |      |
|                 | BAU 2050 | 232.4    | 26.6 | 12.8 | 24.3 | 34.6 | 0.91 | 0.76  |       |       |       |       |      |
|                 | WWS 2050 | 87.8     | 24   | 18.8 | 29.7 | 26.4 | 0.84 | 0.38  | -44.8 | -9.3  | -8.1  | -62.2 | 1.58 |
| United States   | BAU 2018 | 2,172.8  | 16.6 | 13.3 | 25.7 | 41.9 | 1.29 | 1.24  |       |       |       |       |      |
|                 | BAU 2050 | 2,397.7  | 14.9 | 14.9 | 30.1 | 37.4 | 1.38 | 1.32  |       |       |       |       |      |
|                 | WWS 2050 | 979.0    | 18.3 | 19.4 | 36   | 22.7 | 1.03 | 2.53  | -39.9 | -12.2 | -7    | -59.2 | 1.60 |
| Uruguay         | BAU 2018 | 6.8      | 16   | 6.3  | 43.4 | 29.9 | 4.45 | 0     |       |       |       |       |      |
|                 | BAU 2050 | 10.0     | 15.4 | 7.5  | 39.5 | 33.6 | 4    | 0     |       |       |       |       |      |
|                 | WWS 2050 | 5.2      | 16.1 | 10.2 | 54.7 | 17   | 2.12 | 0     | -37.3 | -4.1  | -6.4  | -47.8 | 2.19 |
| Uzbekistan      | BAU 2018 | 48.5     | 30.8 | 9.9  | 37.7 | 15.9 | 4.51 | 1.26  |       |       |       |       |      |
|                 | BAU 2050 | 73.2     | 31.1 | 9.9  | 35.4 | 19   | 3.57 | 1.04  |       |       |       |       |      |
|                 | WWS 2050 | 20.5     | 29.8 | 11.2 | 39.2 | 9.6  | 9.52 | 0.72  | -42.1 | -22.9 | -7    | -72   | 1.95 |
| Venezuela       | BAU 2018 | 49.2     | 10   | 6.3  | 52.2 | 31.3 | 0.11 | 0     |       |       |       |       |      |
|                 | BAU 2050 | 78.7     | 10   | 6.8  | 50.7 | 32.4 | 0.1  | 0     |       |       |       |       |      |
|                 | WWS 2050 | 28.9     | 15.2 | 12.6 | 48.6 | 23.4 | 0.2  | 0     | -35.4 | -22.9 | -4.9  | -63.2 | 2.15 |
| Vietnam         | BAU 2018 | 80.8     | 16.5 | 4.7  | 54.6 | 22.1 | 2.06 | 0     |       |       |       |       |      |
|                 | BAU 2050 | 159.1    | 15.2 | 3.9  | 52.8 | 26.1 | 1.97 | 0     |       |       |       |       |      |
|                 | WWS 2050 | 97.0     | 14.9 | 3    | 69.3 | 11.4 | 1.37 | 0     | -31.5 | -1.2  | -6.4  | -39   | 2.05 |
| Yemen           | BAU 2018 | 3.0      | 27.7 | 3.5  | 19.3 | 44   | 2.08 | 3.4   |       |       |       |       |      |
|                 | BAU 2050 | 4.8      | 22.4 | 3.1  | 21.2 | 47.6 | 2.26 | 3.42  |       |       |       |       |      |
|                 | WWS 2050 | 1.8      | 27   | 3.1  | 32.7 | 33.3 | 1.19 | 2.8   | -49.7 | -5.2  | -7    | -61.9 | 2.59 |
| Zambia          | BAU 2018 | 13.0     | 60.4 | 1.2  | 29.8 | 7.3  | 0.52 | 0.8   |       |       |       |       |      |
|                 | BAU 2050 | 21.9     | 49.3 | 1.7  | 37.6 | 9.8  | 0.63 | 0.93  |       |       |       |       |      |
|                 | WWS 2050 | 10.3     | 27   | 2.3  | 63.9 | 5.6  | 0.68 | 0.51  | -44.4 | -0.6  | -8    | -53   | 2.77 |
| Zimbabwe        | BAU 2018 | 13.9     | 73.9 | 1.2  | 8    | 10.2 | 5.54 | 1.23  |       |       |       |       |      |
|                 | BAU 2050 | 21.5     | 63.2 | 2.1  | 10.6 | 14.8 | 7.69 | 1.57  |       |       |       |       |      |
|                 | WWS 2050 | 6.4      | 46.2 | 5.5  | 28   | 13.1 | 6.01 | 1.18  | -59.7 | -0.8  | -9.7  | -70.2 | 2.57 |
| All Countries   | BAU 2018 | 13,102.3 | 20.8 | 8.2  | 38.1 | 29.2 | 2.22 | 1.52  |       |       |       |       |      |
|                 | BAU 2050 | 20,358.8 | 19.1 | 8    | 37.6 | 31.7 | 2.05 | 1.48  |       |       |       |       |      |
|                 | WWS 2050 | 8,880.6  | 17.5 | 10.5 | 50.5 | 17.9 | 1.84 | 1.84  | -38.4 | -11.3 | -6.64 | -56.4 | 1.85 |

2018 BAU values are from IEA (2021). These values are projected to 2050 using U.S. Energy Information Administration (EIA, 2016) “reference scenario” projections, as described in the text. The EIA projections account for policies, population growth, modest economic and energy growth, some modest renewable energy additions, and modest energy efficiency measures and reduced energy use in each sector. The transportation load includes, among other loads, energy produced in each country for aircraft and shipping. 2050 WWS values are estimated from 2050 BAU values assuming electrification of end-uses and effects of additional energy-efficiency measures beyond those in the BAU case, as described in the text.

**Table S5.** 2050 annual average end-use electric plus heat load (GW) by sector and region after energy in all sectors has been converted to WWS. Instantaneous loads can be higher or lower than annual average loads. Values for each region equal the sum over all country values from Table S4 in each region, where Table S1 defines the regions.

| Region            | Total         | Residential   | Commercial   | Transport     | Industrial    | Agriculture-forestry-fishing | Military-other |
|-------------------|---------------|---------------|--------------|---------------|---------------|------------------------------|----------------|
| Africa            | 488.5         | 139.0         | 37.1         | 193.1         | 105.6         | 7.89                         | 5.77           |
| Australia         | 92.3          | 11.5          | 17.6         | 42.5          | 19.4          | 1.17                         | 0.00           |
| Canada            | 168.0         | 27.4          | 32.4         | 69.7          | 35.0          | 3.39                         | 0.06           |
| Central America   | 160.7         | 24.6          | 11.8         | 74.3          | 41.3          | 3.54                         | 5.22           |
| Central Asia      | 167.0         | 41.3          | 13.8         | 80.4          | 23.7          | 5.31                         | 2.49           |
| China             | 2,358.8       | 383.0         | 136.9        | 1446.7        | 277.1         | 28.13                        | 86.96          |
| Cuba              | 9.00          | 1.62          | 0.49         | 5.74          | 0.78          | 0.11                         | 0.27           |
| Europe            | 948.7         | 199.7         | 167.9        | 355.0         | 210.1         | 14.88                        | 1.17           |
| Haiti             | 7.80          | 1.71          | 0.76         | 3.09          | 2.08          | 0.17                         | 0.00           |
| Iceland           | 3.24          | 0.29          | 0.43         | 2.02          | 0.37          | 0.13                         | 0.00           |
| India             | 982.4         | 166.6         | 39.1         | 570.3         | 138.0         | 48.47                        | 19.94          |
| Israel            | 13.1          | 3.07          | 2.79         | 3.68          | 2.81          | 0.30                         | 0.51           |
| Jamaica           | 2.60          | 0.19          | 0.12         | 1.51          | 0.77          | 0.01                         | 0.00           |
| Japan             | 174.5         | 29.5          | 38.5         | 73.4          | 32.0          | 1.07                         | 0.12           |
| Mauritius         | 1.99          | 0.25          | 0.25         | 0.46          | 1.02          | 0.01                         | 0.00           |
| Mideast           | 708.1         | 117.0         | 68.7         | 375.8         | 123.7         | 13.06                        | 9.79           |
| New Zealand       | 17.0          | 2.13          | 2.47         | 8.42          | 3.29          | 0.59                         | 0.08           |
| Philippines       | 41.8          | 7.41          | 6.49         | 15.9          | 11.4          | 0.56                         | 0.00           |
| Russia            | 254.7         | 65.9          | 29.1         | 114.5         | 41.5          | 3.45                         | 0.21           |
| South America     | 467.9         | 61.3          | 43.2         | 246.5         | 100.6         | 12.82                        | 3.56           |
| Southeast Asia    | 591.7         | 69.3          | 46.7         | 310.4         | 158.3         | 5.21                         | 1.80           |
| South Korea       | 151.3         | 13.0          | 31.1         | 82.2          | 22.0          | 2.55                         | 0.40           |
| Taiwan            | 90.7          | 10.5          | 10.6         | 53.9          | 14.2          | 0.69                         | 0.75           |
| United States     | 979.0         | 179.4         | 190.3        | 352.8         | 221.7         | 10.06                        | 24.73          |
| <b>Total 2050</b> | <b>8880.6</b> | <b>1555.7</b> | <b>928.5</b> | <b>4482.2</b> | <b>1587.0</b> | <b>163.52</b>                | <b>163.84</b>  |

Sector values in each region are obtained by multiplying the total WWS 2050 value for each country by the percentage of the total in each sector, given in Table S4, and summing the result over all countries in a region.



**Table S6.** Annual average WWS all-sector inflexible and flexible loads (GW) for 2050 by region. “Total load” is the sum of “inflexible load” and “flexible load.” “Flexible load” is the sum of “cold load subject to storage,” “low-temperature heat load subject to storage,” “load for H<sub>2</sub>” production, compression, and storage (accounting for leaks as well), and “all other loads subject to demand response (DR).” Annual average loads are distributed in time at 30-s resolution, as described in the text. Instantaneous loads, either flexible or inflexible, can be much higher or lower than annual average loads. Also shown is the annual hydrogen mass needed in each region, estimated as the H<sub>2</sub> load multiplied by 8,760 h/yr and divided by 59.01 kWh/kg-H<sub>2</sub>. Table S1 defines the regions.

| Region          | Total end-use load (GW) | Inflexible load (GW) | Flexible load (GW) | Cold load subject to storage (GW) | Low-temperature heat load subject to storage (GW) | Load for H <sub>2</sub> (GW) | All other loads subject to DR | H <sub>2</sub> needed (Tg-H <sub>2</sub> /yr) |
|-----------------|-------------------------|----------------------|--------------------|-----------------------------------|---------------------------------------------------|------------------------------|-------------------------------|-----------------------------------------------|
| Africa          | 488.5                   | 232.6                | 255.8              | 9.4                               | 30.6                                              | 45.2                         | 170.6                         | 6.71                                          |
| Australia       | 92.3                    | 47.1                 | 45.1               | 0.5                               | 2.9                                               | 8.0                          | 33.8                          | 1.18                                          |
| Canada          | 168.0                   | 84.6                 | 83.4               | 0.6                               | 9.7                                               | 10.9                         | 62.2                          | 1.62                                          |
| Central America | 160.7                   | 72.8                 | 87.9               | 1.7                               | 5.3                                               | 17.9                         | 63.0                          | 2.66                                          |
| Central Asia    | 167.0                   | 88.4                 | 78.6               | 0.2                               | 7.6                                               | 9.7                          | 61.1                          | 1.45                                          |
| China           | 2,359                   | 1,076                | 1,283.             | 28.3                              | 170.7                                             | 84.1                         | 1,000                         | 12.5                                          |
| Cuba            | 9.00                    | 4.39                 | 4.61               | 0.25                              | 0.40                                              | 0.29                         | 3.66                          | 0.04                                          |
| Europe          | 948.7                   | 419.4                | 529.3              | 11.1                              | 128.3                                             | 74.1                         | 315.9                         | 11.00                                         |
| Haiti           | 7.80                    | 3.77                 | 4.03               | 0.08                              | 0.31                                              | 0.91                         | 2.74                          | 0.13                                          |
| Iceland         | 3.24                    | 1.18                 | 2.06               | 0.04                              | 0.55                                              | 0.14                         | 1.33                          | 0.02                                          |
| India           | 982.4                   | 456.9                | 525.5              | 11.5                              | 42.1                                              | 56.4                         | 415.6                         | 8.37                                          |
| Israel          | 13.1                    | 6.77                 | 6.37               | 0.27                              | 0.73                                              | 1.24                         | 4.13                          | 0.18                                          |
| Jamaica         | 2.60                    | 1.12                 | 1.48               | 0                                 | 0.03                                              | 0.33                         | 1.12                          | 0.05                                          |
| Japan           | 174.5                   | 95.3                 | 79.3               | 0.3                               | 7.1                                               | 11.2                         | 60.6                          | 1.67                                          |
| Mauritius       | 1.99                    | 0.66                 | 1.33               | 0.07                              | 0.08                                              | 0.45                         | 0.73                          | 0.07                                          |
| Mideast         | 708.1                   | 339.5                | 368.6              | 2.9                               | 22.4                                              | 53.6                         | 289.7                         | 7.95                                          |
| New Zealand     | 17.0                    | 8.80                 | 8.18               | 0.01                              | 0.40                                              | 1.44                         | 6.32                          | 0.21                                          |
| Philippines     | 41.8                    | 18.0                 | 23.8               | 1.7                               | 2.8                                               | 4.9                          | 14.4                          | 0.72                                          |
| Russia          | 254.7                   | 103.4                | 151.3              | 3.2                               | 41.5                                              | 14.0                         | 92.7                          | 2.08                                          |
| South America   | 467.9                   | 219.2                | 248.7              | 7.3                               | 13.0                                              | 38.1                         | 190.3                         | 5.65                                          |
| Southeast Asia  | 591.7                   | 256.4                | 335.2              | 8.1                               | 19.3                                              | 66.7                         | 241.1                         | 9.91                                          |
| South Korea     | 151.3                   | 79.8                 | 71.5               | 0.4                               | 6.8                                               | 9.3                          | 55.0                          | 1.38                                          |
| Taiwan          | 90.7                    | 43.3                 | 47.4               | 0.6                               | 4.2                                               | 5.8                          | 36.9                          | 0.86                                          |
| United States   | 979.0                   | 483.9                | 495.0              | 7.4                               | 53.3                                              | 90.9                         | 343.4                         | 13.50                                         |
| <b>Total</b>    | <b>8,880.6</b>          | <b>4142.9</b>        | <b>4,738</b>       | <b>95.6</b>                       | <b>570.1</b>                                      | <b>605.6</b>                 | <b>3,467.</b>                 | <b>89.9</b>                                   |

**Table S7.** 2050 rooftop areas suitable for solar PV panels and the potential PV nameplate capacity fitting in the suitable rooftop areas, for 145 countries. Residential values include rooftops over associated residential parking areas. Commercial/government values include institutional buildings (e.g., schools) and industrial buildings. About 12.3% and 50.4% of potential residential and commercial/government rooftop areas, respectively, are proposed to be installed by 2050 based on the final nameplate capacities for all countries from Table S9. The methodology for determining suitable rooftop area is described in Jacobson et al. (2017) and summarized in the footnote below.

| Country           | Residential rooftop area suitable for PVs in 2050 (km <sup>2</sup> ) | Potential nameplate capacity of suitable area in 2050 (MW <sub>dc-peak</sub> ) | Commercial/govt. rooftop area suitable for PVs in 2050 (km <sup>2</sup> ) | Potential nameplate capacity of suitable area in 2050 (MW <sub>dc-peak</sub> ) | Country         | Residential rooftop area suitable for PVs in 2050 (km <sup>2</sup> ) | Potential nameplate capacity of suitable area in 2050 (MW <sub>dc-peak</sub> ) | Commercial/govt. rooftop area suitable for PVs in 2050 (km <sup>2</sup> ) | Potential nameplate capacity of suitable area in 2050 (MW <sub>dc-peak</sub> ) |
|-------------------|----------------------------------------------------------------------|--------------------------------------------------------------------------------|---------------------------------------------------------------------------|--------------------------------------------------------------------------------|-----------------|----------------------------------------------------------------------|--------------------------------------------------------------------------------|---------------------------------------------------------------------------|--------------------------------------------------------------------------------|
| Albania           | 27                                                                   | 6,343                                                                          | 19                                                                        | 4,457                                                                          | Kuwait          | 29                                                                   | 6,825                                                                          | 15                                                                        | 3,595                                                                          |
| Algeria           | 722                                                                  | 172,657                                                                        | 410                                                                       | 98,090                                                                         | Kyrgyzstan      | 79                                                                   | 18,874                                                                         | 32                                                                        | 7,772                                                                          |
| Angola            | 786                                                                  | 188,041                                                                        | 294                                                                       | 70,253                                                                         | Lao PDR         | 170                                                                  | 40,571                                                                         | 50                                                                        | 12,073                                                                         |
| Argentina         | 635                                                                  | 151,995                                                                        | 445                                                                       | 106,496                                                                        | Latvia          | 12                                                                   | 2,970                                                                          | 22                                                                        | 5,206                                                                          |
| Armenia           | 29                                                                   | 6,928                                                                          | 17                                                                        | 4,072                                                                          | Lebanon         | 23                                                                   | 5,485                                                                          | 12                                                                        | 2,888                                                                          |
| Australia         | 953                                                                  | 227,927                                                                        | 574                                                                       | 137,246                                                                        | Libya           | 212                                                                  | 50,624                                                                         | 120                                                                       | 28,693                                                                         |
| Austria           | 81                                                                   | 19,396                                                                         | 65                                                                        | 15,613                                                                         | Lithuania       | 21                                                                   | 5,046                                                                          | 39                                                                        | 9,261                                                                          |
| Azerbaijan        | 146                                                                  | 34,978                                                                         | 91                                                                        | 21,679                                                                         | Luxembourg      | 2                                                                    | 386                                                                            | 2                                                                         | 375                                                                            |
| Bahrain           | 11                                                                   | 2,588                                                                          | 4                                                                         | 1,017                                                                          | Macedonia, Nor. | 21                                                                   | 5,117                                                                          | 14                                                                        | 3,273                                                                          |
| Bangladesh        | 1,412                                                                | 337,619                                                                        | 224                                                                       | 53,511                                                                         | Malaysia        | 966                                                                  | 231,149                                                                        | 370                                                                       | 88,532                                                                         |
| Belarus           | 37                                                                   | 8,783                                                                          | 63                                                                        | 15,031                                                                         | Malta           | 2                                                                    | 412                                                                            | 1                                                                         | 175                                                                            |
| Belgium           | 22                                                                   | 5,244                                                                          | 19                                                                        | 4,545                                                                          | Mauritius       | 25                                                                   | 6,011                                                                          | 7                                                                         | 1,766                                                                          |
| Benin             | 275                                                                  | 65,890                                                                         | 44                                                                        | 10,639                                                                         | Mexico          | 2,080                                                                | 497,569                                                                        | 1,053                                                                     | 251,800                                                                        |
| Bolivia           | 277                                                                  | 66,317                                                                         | 110                                                                       | 26,413                                                                         | Moldova         | 16                                                                   | 3,709                                                                          | 8                                                                         | 2,011                                                                          |
| Bosnia & Herz.    | 41                                                                   | 9,825                                                                          | 26                                                                        | 6,317                                                                          | Mongolia        | 52                                                                   | 12,527                                                                         | 49                                                                        | 11,822                                                                         |
| Botswana          | 65                                                                   | 15,572                                                                         | 36                                                                        | 8,495                                                                          | Montenegro      | 6                                                                    | 1,479                                                                          | 5                                                                         | 1,139                                                                          |
| Brazil            | 3,877                                                                | 927,203                                                                        | 1,725                                                                     | 412,470                                                                        | Morocco         | 482                                                                  | 115,331                                                                        | 220                                                                       | 52,718                                                                         |
| Brunei            | 20                                                                   | 4,707                                                                          | 8                                                                         | 1,851                                                                          | Mozambique      | 726                                                                  | 173,711                                                                        | 111                                                                       | 26,507                                                                         |
| Bulgaria          | 54                                                                   | 13,007                                                                         | 52                                                                        | 12,537                                                                         | Myanmar         | 1,033                                                                | 247,090                                                                        | 241                                                                       | 57,733                                                                         |
| Cambodia          | 359                                                                  | 85,786                                                                         | 63                                                                        | 15,045                                                                         | Namibia         | 47                                                                   | 11,325                                                                         | 24                                                                        | 5,631                                                                          |
| Cameroon          | 513                                                                  | 122,761                                                                        | 119                                                                       | 28,555                                                                         | Nepal           | 438                                                                  | 104,845                                                                        | 61                                                                        | 14,548                                                                         |
| Canada            | 404                                                                  | 96,685                                                                         | 778                                                                       | 185,972                                                                        | Netherlands     | 33                                                                   | 7,917                                                                          | 55                                                                        | 13,036                                                                         |
| Chile             | 253                                                                  | 60,406                                                                         | 167                                                                       | 39,873                                                                         | New Zealand     | 85                                                                   | 20,397                                                                         | 65                                                                        | 15,491                                                                         |
| China             | 16,004                                                               | 3,827,777                                                                      | 9,817                                                                     | 2,347,998                                                                      | Nicaragua       | 113                                                                  | 26,912                                                                         | 34                                                                        | 8,235                                                                          |
| Taiwan            | 308                                                                  | 73,776                                                                         | 134                                                                       | 31,964                                                                         | Niger           | 843                                                                  | 201,591                                                                        | 72                                                                        | 17,248                                                                         |
| Colombia          | 1,008                                                                | 241,207                                                                        | 382                                                                       | 91,371                                                                         | Nigeria         | 5,211                                                                | 1,246,228                                                                      | 1,422                                                                     | 340,101                                                                        |
| Congo             | 209                                                                  | 50,051                                                                         | 69                                                                        | 16,496                                                                         | Norway          | 42                                                                   | 10,147                                                                         | 81                                                                        | 19,311                                                                         |
| Congo, DR         | 2,162                                                                | 517,040                                                                        | 268                                                                       | 64,009                                                                         | Oman            | 112                                                                  | 26,680                                                                         | 63                                                                        | 14,990                                                                         |
| Costa Rica        | 73                                                                   | 17,423                                                                         | 30                                                                        | 7,236                                                                          | Pakistan        | 2,756                                                                | 659,132                                                                        | 761                                                                       | 181,931                                                                        |
| Côte d'Ivoire     | 549                                                                  | 131,276                                                                        | 118                                                                       | 28,309                                                                         | Panama          | 116                                                                  | 27,814                                                                         | 46                                                                        | 11,082                                                                         |
| Croatia           | 45                                                                   | 10,675                                                                         | 34                                                                        | 8,246                                                                          | Paraguay        | 142                                                                  | 34,003                                                                         | 62                                                                        | 14,855                                                                         |
| Cuba              | 149                                                                  | 35,693                                                                         | 71                                                                        | 17,064                                                                         | Peru            | 718                                                                  | 171,662                                                                        | 287                                                                       | 68,628                                                                         |
| Curacao           | 2                                                                    | 394                                                                            | 1                                                                         | 160                                                                            | Philippines     | 2,230                                                                | 533,393                                                                        | 577                                                                       | 137,913                                                                        |
| Cyprus            | 30                                                                   | 7,223                                                                          | 10                                                                        | 2,377                                                                          | Poland          | 205                                                                  | 49,026                                                                         | 355                                                                       | 84,886                                                                         |
| Czech Republic    | 58                                                                   | 13,876                                                                         | 59                                                                        | 14,070                                                                         | Portugal        | 139                                                                  | 33,321                                                                         | 70                                                                        | 16,657                                                                         |
| Denmark           | 24                                                                   | 5,662                                                                          | 41                                                                        | 9,775                                                                          | Qatar           | 17                                                                   | 4,108                                                                          | 8                                                                         | 1,899                                                                          |
| Dominican Rep.    | 100                                                                  | 23,806                                                                         | 46                                                                        | 10,900                                                                         | Romania         | 182                                                                  | 43,559                                                                         | 88                                                                        | 21,058                                                                         |
| Ecuador           | 456                                                                  | 109,077                                                                        | 149                                                                       | 35,601                                                                         | Russia          | 926                                                                  | 221,449                                                                        | 1,727                                                                     | 413,101                                                                        |
| Egypt             | 2,053                                                                | 490,921                                                                        | 742                                                                       | 177,350                                                                        | Saudi Arabia    | 1,142                                                                | 273,130                                                                        | 634                                                                       | 151,583                                                                        |
| El Salvador       | 59                                                                   | 14,194                                                                         | 22                                                                        | 5,146                                                                          | Senegal         | 329                                                                  | 78,709                                                                         | 63                                                                        | 15,154                                                                         |
| Equatorial Guinea | 46                                                                   | 11,034                                                                         | 18                                                                        | 4,393                                                                          | Serbia          | 62                                                                   | 14,833                                                                         | 61                                                                        | 14,699                                                                         |
| Eritrea           | 154                                                                  | 36,809                                                                         | 16                                                                        | 3,882                                                                          | Singapore       | 29                                                                   | 6,964                                                                          | 6                                                                         | 1,540                                                                          |
| Estonia           | 6                                                                    | 1,413                                                                          | 11                                                                        | 2,657                                                                          | Slovak Republic | 42                                                                   | 10,152                                                                         | 39                                                                        | 9,366                                                                          |
| Ethiopia          | 3,872                                                                | 926,148                                                                        | 295                                                                       | 70,628                                                                         | Slovenia        | 17                                                                   | 4,034                                                                          | 19                                                                        | 4,444                                                                          |
| Finland           | 30                                                                   | 7,099                                                                          | 74                                                                        | 17,640                                                                         | South Africa    | 701                                                                  | 167,704                                                                        | 365                                                                       | 87,271                                                                         |

|                |        |           |       |           |                      |                |                   |               |                   |
|----------------|--------|-----------|-------|-----------|----------------------|----------------|-------------------|---------------|-------------------|
| France         | 535    | 128,062   | 466   | 111,490   | South Sudan          | 498            | 119,201           | 58            | 13,804            |
| Gabon          | 98     | 23,374    | 41    | 9,925     | Spain                | 554            | 132,424           | 250           | 59,716            |
| Georgia        | 40     | 9,475     | 26    | 6,296     | Sri Lanka            | 585            | 139,820           | 122           | 29,109            |
| Germany        | 454    | 108,574   | 493   | 117,809   | Sudan                | 1,584          | 378,955           | 368           | 88,066            |
| Ghana          | 535    | 127,961   | 131   | 31,387    | Suriname             | 24             | 5,771             | 10            | 2,402             |
| Gibraltar      | 0      | 14        | 0     | 6         | Sweden               | 48             | 11,411            | 87            | 20,764            |
| Greece         | 84     | 20,106    | 72    | 17,291    | Switzerland          | 83             | 19,948            | 71            | 16,895            |
| Guatemala      | 309    | 73,974    | 93    | 22,318    | Syria                | 311            | 74,455            | 149           | 35,642            |
| Haiti          | 94     | 22,573    | 15    | 3,620     | Tajikistan           | 116            | 27,860            | 35            | 8,298             |
| Honduras       | 163    | 38,890    | 49    | 11,631    | Tanzania             | 1,085          | 259,622           | 187           | 44,778            |
| Hong Kong      | 14     | 3,433     | 5     | 1,215     | Thailand             | 1,410          | 337,161           | 518           | 123,983           |
| Hungary        | 72     | 17,229    | 72    | 17,134    | Togo                 | 194            | 46,516            | 21            | 5,089             |
| Iceland        | 3      | 777       | 6     | 1,499     | Trinidad & Tob.      | 27             | 6,554             | 9             | 2,113             |
| India          | 20,075 | 4,801,528 | 5,526 | 1,321,635 | Tunisia              | 134            | 32,043            | 73            | 17,506            |
| Indonesia      | 6,264  | 1,498,214 | 2,015 | 481,900   | Turkey               | 948            | 226,706           | 656           | 156,988           |
| Iran           | 1,279  | 305,786   | 773   | 184,810   | Turkmenistan         | 129            | 30,875            | 85            | 20,346            |
| Iraq           | 682    | 163,129   | 385   | 92,192    | Ukraine              | 232            | 55,602            | 204           | 48,719            |
| Ireland        | 48     | 11,458    | 54    | 12,963    | United Arab Em       | 123            | 29,531            | 65            | 15,503            |
| Israel         | 78     | 18,770    | 36    | 8,556     | United Kingdom       | 192            | 45,934            | 324           | 77,400            |
| Italy          | 703    | 168,258   | 254   | 60,670    | United States        | 8,087          | 1,934,268         | 5,509         | 1,317,664         |
| Jamaica        | 43     | 10,326    | 14    | 3,294     | Uruguay              | 40             | 9,650             | 25            | 5,934             |
| Japan          | 757    | 181,054   | 425   | 101,686   | Uzbekistan           | 339            | 81,160            | 175           | 41,924            |
| Jordan         | 74     | 17,612    | 40    | 9,654     | Venezuela            | 697            | 166,684           | 273           | 65,343            |
| Kazakhstan     | 419    | 100,138   | 385   | 92,186    | Vietnam              | 1,397          | 334,072           | 353           | 84,501            |
| Kenya          | 1,265  | 302,450   | 207   | 49,611    | Yemen                | 674            | 161,297           | 168           | 40,098            |
| Korea, DPR     | 148    | 35,334    | 45    | 10,874    | Zambia               | 602            | 143,994           | 152           | 36,250            |
| Korea, Rep. of | 481    | 114,932   | 265   | 63,459    | Zimbabwe             | 346            | 82,865            | 49            | 11,788            |
| Kosovo         | 13     | 3,084     | 8     | 1,909     | <b>All Countries</b> | <b>116,225</b> | <b>27,798,049</b> | <b>49,073</b> | <b>11,737,091</b> |

Rooftops considered include those over residential buildings (excluding parking), residential parking, commercial/government/institutional buildings (including parking), and industrial buildings (including parking). Residential rooftops and residential parking rooftop areas are then combined into residential rooftop values reported here and commercial/government/institutional building rooftops and industrial building rooftops are combined into commercial/government values reported here.

The total rooftop area for each type of building is the product of the floor area per capita, the population, an overhang multiplier, and a pitch (slope) multiplier, divided by the average number of stories (Jacobson et al., 2017). The floor area per capita depends on the fraction of the country's population that is urban versus rural and some other factors. The potential rooftop or canopy area over residential parking spaces in each country is computed as a function of the number of passenger cars per person, the number of parking spaces per car, the average parking space area per car, the percentage of parking spaces that are covered, and the percentage of covered spaces with exposed roof (Jacobson et al., 2017).

The rooftop area suitable for PV is the fraction of roof area that is south facing (in the Northern Hemisphere) or flat and non-shaded. The fraction is calculated as a function of the following parameters in each country: average building height (the greater the average height, the greater the variation in height, and the more likely buildings shade one-another); average rooftop area (the greater the area, the more likely some significant portion of the area is unshaded); the percentage of rooftop area that is flat (the entire area of a flat roof is often suitable for PV); and the average slope of pitched roofs (the steeper the roof, the less suitable it is for PVs if it is pitched away from the sun) (Jacobson et al., 2017).

The potential nameplate capacity of PV is the suitable area multiplied by a maximum possible installed power density of PV in 2050, estimate at 239 W/m<sup>2</sup>.

**Table S8.** Existing nameplate capacity (GW) by WWS generator in each region and each country within each region in 2020 (except solar heat data are from 2018 and geothermal heat data are from 2019).

| Region or country      | On-shore wind | Off-shore wind | Residential roof PV | Com /gov roof PV | Utility PV     | CSP with storage | Geothermal electricity | Hydro         | Tidal         | Wave         | Solar heat    | Geothermal heat |
|------------------------|---------------|----------------|---------------------|------------------|----------------|------------------|------------------------|---------------|---------------|--------------|---------------|-----------------|
| <b>Africa</b>          | <b>6.483</b>  | <b>0</b>       | <b>1.751</b>        | <b>1.751</b>     | <b>5.253</b>   | <b>1.076</b>     | <b>0.8313</b>          | <b>31.516</b> | <b>0.0004</b> | <b>0</b>     | <b>2.654</b>  | <b>0.1942</b>   |
| Algeria                | 0.010         | 0              | 0.085               | 0.085            | 0.254          | 0.025            | 0                      | 0.269         | 0             | 0            | 0             | 0.0777          |
| Angola                 | 0             | 0              | 0.003               | 0.003            | 0.008          | 0                | 0                      | 3.836         | 0             | 0            | 0             | 0               |
| Benin                  | 0             | 0              | 0.001               | 0.001            | 0.002          | 0                | 0                      | 0.033         | 0             | 0            | 0             | 0               |
| Botswana               | 0             | 0              | 0.001               | 0.001            | 0.004          | 0                | 0                      | 0             | 0             | 0            | 0.009         | 0               |
| Cameroon               | 0             | 0              | 0.003               | 0.003            | 0.008          | 0                | 0                      | 0.822         | 0             | 0            | 0             | 0               |
| Congo                  | 0             | 0              | 0.000               | 0.000            | 0.001          | 0                | 0                      | 0.218         | 0             | 0            | 0             | 0               |
| Congo, DR              | 0             | 0              | 0.004               | 0.004            | 0.012          | 0                | 0                      | 2.76          | 0             | 0            | 0             | 0               |
| Côte d'Ivoire          | 0             | 0              | 0.003               | 0.003            | 0.008          | 0                | 0                      | 0.879         | 0             | 0            | 0             | 0               |
| Egypt                  | 1.465         | 0              | 0.335               | 0.335            | 1.004          | 0.021            | 0                      | 2.876         | 0             | 0            | 0             | 0.044           |
| Equator. Guinea        | 0             | 0              | 0.000               | 0.000            | 0.000          | 0                | 0                      | 0.128         | 0             | 0            | 0             | 0               |
| Eritrea                | 0.001         | 0              | 0.004               | 0.004            | 0.013          | 0                | 0                      | 0             | 0             | 0            | 0             | 0               |
| Ethiopia               | 0.324         | 0              | 0.004               | 0.004            | 0.012          | 0                | 0.0073                 | 4.074         | 0             | 0            | 0             | 0.0022          |
| Gabon                  | 0             | 0              | 0.000               | 0.000            | 0.001          | 0                | 0                      | 0.331         | 0             | 0            | 0             | 0               |
| Ghana                  | 0             | 0              | 0.014               | 0.014            | 0.042          | 0                | 0                      | 1.584         | 0.0004        | 0            | 0.002         | 0               |
| Kenya                  | 0.338         | 0              | 0.021               | 0.021            | 0.064          | 0                | 0.824                  | 0.837         | 0             | 0            | 0             | 0.0185          |
| Libya                  | 0             | 0              | 0.001               | 0.001            | 0.003          | 0                | 0                      | 0             | 0             | 0            | 0             | 0               |
| Morocco                | 1.405         | 0              | 0.041               | 0.041            | 0.122          | 0.53             | 0                      | 1.305         | 0             | 0            | 0.316         | 0.005           |
| Mozambique             | 0             | 0              | 0.011               | 0.011            | 0.033          | 0                | 0                      | 2.216         | 0             | 0            | 0.002         | 0               |
| Namibia                | 0.006         | 0              | 0.029               | 0.029            | 0.087          | 0                | 0                      | 0.347         | 0             | 0            | 0.032         | 0               |
| Niger                  | 0             | 0              | 0.005               | 0.005            | 0.016          | 0                | 0                      | 0             | 0             | 0            | 0             | 0               |
| Nigeria                | 0.003         | 0              | 0.006               | 0.006            | 0.017          | 0                | 0                      | 2.111         | 0             | 0            | 0.003         | 0.0007          |
| Senegal                | 0.050         | 0              | 0.031               | 0.031            | 0.093          | 0                | 0                      | 0.081         | 0             | 0            | 0.003         | 0               |
| South Africa           | 2.636         | 0              | 1.098               | 1.098            | 3.294          | 0.5              | 0                      | 0.684         | 0             | 0            | 1.521         | 0.0023          |
| South Sudan            | 0             | 0              | 0.000               | 0.000            | 0.001          | 0                | 0                      | 0             | 0             | 0            | 0             | 0               |
| Sudan                  | 0             | 0              | 0.004               | 0.004            | 0.011          | 0                | 0                      | 1.923         | 0             | 0            | 0             | 0               |
| Tanzania               | 0             | 0              | 0.005               | 0.005            | 0.016          | 0                | 0                      | 0.596         | 0             | 0            | 0             | 0               |
| Togo                   | 0             | 0              | 0.001               | 0.001            | 0.002          | 0                | 0                      | 0.049         | 0             | 0            | 0             | 0               |
| Tunisia                | 0.245         | 0              | 0.019               | 0.019            | 0.057          | 0                | 0                      | 0.066         | 0             | 0            | 0.724         | 0.0438          |
| Zambia                 | 0             | 0              | 0.020               | 0.020            | 0.059          | 0                | 0                      | 2.4           | 0             | 0            | 0             | 0               |
| Zimbabwe               | 0             | 0              | 0.003               | 0.003            | 0.010          | 0                | 0                      | 1.091         | 0             | 0            | 0.042         | 0               |
| <b>Australia</b>       | <b>9.457</b>  | <b>0</b>       | <b>3.525</b>        | <b>3.525</b>     | <b>10.575</b>  | <b>0.002</b>     | <b>0.0001</b>          | <b>7.45</b>   | <b>0</b>      | <b>0.001</b> | <b>6.451</b>  | <b>0.0944</b>   |
| <b>Canada</b>          | <b>13.577</b> | <b>0</b>       | <b>0.665</b>        | <b>0.665</b>     | <b>1.995</b>   | <b>0</b>         | <b>0</b>               | <b>81.823</b> | <b>0</b>      | <b>0.02</b>  | <b>0.637</b>  | <b>1.8313</b>   |
| <b>Central America</b> | <b>9.327</b>  | <b>0</b>       | <b>1.389</b>        | <b>1.389</b>     | <b>4.167</b>   | <b>0.014</b>     | <b>1.6136</b>          | <b>19.857</b> | <b>0</b>      | <b>0</b>     | <b>3.027</b>  | <b>0.1655</b>   |
| Costa Rica             | 0.394         | 0              | 0.011               | 0.011            | 0.034          | 0                | 0.262                  | 2.331         | 0             | 0            | 0             | 0.0018          |
| El Salvador            | 0             | 0              | 0.086               | 0.086            | 0.257          | 0                | 0.2044                 | 0.575         | 0             | 0            | 0             | 0.0034          |
| Guatemala              | 0.107         | 0              | 0.020               | 0.020            | 0.061          | 0                | 0.0492                 | 1.559         | 0             | 0            | 0             | 0.0023          |
| Honduras               | 0.241         | 0              | 0.103               | 0.103            | 0.308          | 0                | 0.039                  | 0.837         | 0             | 0            | 0             | 0.0019          |
| Mexico                 | 8.128         | 0              | 1.126               | 1.126            | 3.378          | 0.014            | 0.906                  | 12.612        | 0             | 0            | 3.027         | 0.1561          |
| Nicaragua              | 0.186         | 0              | 0.003               | 0.003            | 0.010          | 0                | 0.153                  | 0.157         | 0             | 0            | 0             | 0               |
| Panama                 | 0.270         | 0              | 0.040               | 0.040            | 0.119          | 0                | 0                      | 1.786         | 0             | 0            | 0             | 0               |
| <b>Central Asia</b>    | <b>1.774</b>  | <b>0</b>       | <b>0.492</b>        | <b>0.492</b>     | <b>1.476</b>   | <b>0</b>         | <b>0</b>               | <b>24.956</b> | <b>0</b>      | <b>0</b>     | <b>0</b>      | <b>0.0029</b>   |
| Kazakhstan             | 0.486         | 0              | 0.344               | 0.344            | 1.031          | 0                | 0                      | 2.73          | 0             | 0            | 0             | 0               |
| Kyrgyz Republic        | 0             | 0              | 0.000               | 0.000            | 0.000          | 0                | 0                      | 3.892         | 0             | 0            | 0             | 0               |
| Pakistan               | 1.287         | 0              | 0.147               | 0.147            | 0.442          | 0                | 0                      | 9.929         | 0             | 0            | 0             | 0               |
| Tajikistan             | 0             | 0              | 0                   | 0                | 0              | 0                | 0                      | 6.395         | 0             | 0            | 0             | 0.0029          |
| Turkmenistan           | 0             | 0              | 0                   | 0                | 0              | 0                | 0                      | 0.005         | 0             | 0            | 0             | 0               |
| Uzbekistan             | 0.001         | 0              | 0.001               | 0.001            | 0.002          | 0                | 0                      | 2.005         | 0             | 0            | 0             | 0               |
| <b>China Region</b>    | <b>278.48</b> | <b>9.996</b>   | <b>50.793</b>       | <b>50.793</b>    | <b>152.380</b> | <b>0.521</b>     | <b>0.0258</b>          | <b>343.7</b>  | <b>0</b>      | <b>0.005</b> | <b>337.62</b> | <b>40.63</b>    |
| China                  | 278.32        | 9.996          | 50.767              | 50.767           | 152.300        | 0.521            | 0.0258                 | 338.67        | 0             | 0.005        | 337.62        | 40.61           |
| Hong Kong              | 0             | 0              | 0.000               | 0.000            | 0.000          | 0                | 0                      | 0             | 0             | 0            | 0             | 0               |
| Korea, DPR             | 0.001         | 0              | 0.008               | 0.008            | 0.025          | 0                | 0                      | 5.01          | 0             | 0            | 0             | 0               |
| Mongolia               | 0.156         | 0              | 0.018               | 0.018            | 0.054          | 0                | 0                      | 0.023         | 0             | 0            | 0             | 0.0227          |

|                     |               |               |               |               |               |               |              |               |               |               |               |               |
|---------------------|---------------|---------------|---------------|---------------|---------------|---------------|--------------|---------------|---------------|---------------|---------------|---------------|
| <b>Cuba</b>         | <b>0.012</b>  | <b>0</b>      | <b>0.033</b>  | <b>0.033</b>  | <b>0.098</b>  | <b>0</b>      | <b>0</b>     | <b>0.068</b>  | <b>0</b>      | <b>0</b>      | <b>0</b>      | <b>0</b>      |
| <b>Europe</b>       | <b>184.90</b> | <b>25.015</b> | <b>32.227</b> | <b>32.227</b> | <b>96.680</b> | <b>2.3212</b> | <b>0.896</b> | <b>166.3</b>  | <b>0.0001</b> | <b>0.2431</b> | <b>39.166</b> | <b>31.637</b> |
| Albania             | 0             | 0             | 0.003         | 0.003         | 0.010         | 0             | 0            | 2.39          | 0             | 0             | 0.181         | 0.0162        |
| Austria             | 3.224         | 0             | 0.444         | 0.444         | 1.332         | 0             | 0.0009       | 9.001         | 0             | 0             | 3.583         | 1.0958        |
| Belarus             | 0.120         | 0             | 0.032         | 0.032         | 0.095         | 0             | 0            | 0.097         | 0             | 0             | 0             | 0.01          |
| Belgium             | 2.459         | 2.262         | 1.129         | 1.129         | 3.388         | 0             | 0            | 0.12          | 0             | 0             | 0.483         | 0.3057        |
| Bosnia-Herzeg.      | 0.135         | 0             | 0.007         | 0.007         | 0.021         | 0             | 0            | 2.093         | 0             | 0             | 0             | 0.036         |
| Bulgaria            | 0.703         | 0             | 0.215         | 0.215         | 0.644         | 0             | 0            | 1.725         | 0             | 0             | 0.1           | 0.1094        |
| Croatia             | 0.803         | 0             | 0.017         | 0.017         | 0.051         | 0             | 0.01         | 1.848         | 0             | 0             | 0.161         | 0.0793        |
| Cyprus              | 0.158         | 0             | 0.040         | 0.040         | 0.120         | 0             | 0            | 0             | 0             | 0             | 0.551         | 0.0103        |
| Czech Rep.          | 0.337         | 0             | 0.415         | 0.415         | 1.244         | 0             | 0            | 1.097         | 0             | 0             | 0.781         | 0.3245        |
| Denmark             | 4.478         | 1.703         | 0.260         | 0.260         | 0.780         | 0             | 0            | 0.009         | 0             | 0             | 1.175         | 0.7436        |
| Estonia             | 0.320         | 0             | 0.026         | 0.026         | 0.078         | 0             | 0            | 0.008         | 0             | 0             | 0.012         | 0.063         |
| Finland             | 2.515         | 0.071         | 0.078         | 0.078         | 0.235         | 0             | 0            | 3.263         | 0             | 0             | 0.048         | 2.3           |
| France              | 17.947        | 0.002         | 2.345         | 2.345         | 7.034         | 0.009         | 0.0159       | 19.671        | 0             | 0.214         | 1.951         | 2.5976        |
| Germany             | 55.122        | 7.689         | 10.756        | 10.756        | 32.269        | 0.002         | 0.04         | 4.658         | 0             | 0             | 13.877        | 4.8063        |
| Gibraltar           | 0             | 0             | 0.000         | 0.000         | 0.000         | 0             | 0            | 0             | 0.0001        | 0             | 0             | 0             |
| Greece              | 4.113         | 0             | 0.649         | 0.649         | 1.948         | 0             | 0            | 2.697         | 0             | 0             | 3.299         | 0.2595        |
| Hungary             | 0.329         | 0             | 0.391         | 0.391         | 1.172         | 0             | 0.003        | 0.056         | 0             | 0             | 0.229         | 1.0237        |
| Ireland             | 4.326         | 0.025         | 0.008         | 0.008         | 0.024         | 0             | 0            | 0.237         | 0             | 0             | 0.233         | 0.2009        |
| Italy               | 10.852        | 0             | 4.319         | 4.319         | 12.956        | 0.0061        | 0.797        | 14.908        | 0             | 0             | 3.305         | 1.425         |
| Kosovo              | 0.032         | 0             | 0.002         | 0.002         | 0.006         | 0             | 0            | 0.092         | 0             | 0             | 0             | 0             |
| Latvia              | 0.066         | 0             | 0.001         | 0.001         | 0.004         | 0             | 0            | 1.576         | 0             | 0             | 0.011         | 0.0016        |
| Lithuania           | 0.548         | 0             | 0.030         | 0.030         | 0.089         | 0             | 0            | 0.116         | 0             | 0             | 0.013         | 0.1255        |
| Luxembourg          | 0.166         | 0             | 0.039         | 0.039         | 0.117         | 0             | 0            | 0.034         | 0             | 0             | 0.046         | 0             |
| Macedonia           | 0.037         | 0             | 0.019         | 0.019         | 0.056         | 0             | 0            | 0.674         | 0             | 0             | 0.068         | 0.0474        |
| Malta               | 0             | 0             | 0.037         | 0.037         | 0.110         | 0             | 0            | 0             | 0             | 0             | 0.051         | 0             |
| Moldova             | 0.034         | 0             | 0.001         | 0.001         | 0.003         | 0             | 0            | 0.076         | 0             | 0             | 0             | 0             |
| Montenegro          | 0.118         | 0             | 0.001         | 0.001         | 0.004         | 0             | 0            | 0.658         | 0             | 0             | 0             | 0             |
| Netherlands         | 4.174         | 2.611         | 2.043         | 2.043         | 6.128         | 0             | 0            | 0.038         | 0             | 0.0021        | 0.46          | 1.7191        |
| Norway              | 3.977         | 0.002         | 0.030         | 0.030         | 0.091         | 0             | 0            | 31.556        | 0             | 0             | 0.031         | 1.1502        |
| Poland              | 6.614         | 0             | 0.787         | 0.787         | 2.362         | 0             | 0            | 0.605         | 0             | 0             | 1.791         | 0.756         |
| Portugal            | 5.461         | 0.025         | 0.205         | 0.205         | 0.615         | 0             | 0.0291       | 4.373         | 0             | 0             | 0.77          | 0.0211        |
| Romania             | 3.030         | 0             | 0.277         | 0.277         | 0.832         | 0.0001        | 0.0001       | 6.221         | 0             | 0             | 0.143         | 0.2451        |
| Serbia              | 0.397         | 0             | 0.006         | 0.006         | 0.017         | 0             | 0            | 2.484         | 0             | 0             | 0             | 0.1153        |
| Slovakia            | 0.003         | 0             | 0.119         | 0.119         | 0.356         | 0             | 0            | 1.505         | 0             | 0             | 0.121         | 0.2303        |
| Slovenia            | 0.003         | 0             | 0.053         | 0.053         | 0.160         | 0             | 0            | 1.344         | 0             | 0             | 0.104         | 0.2656        |
| Spain               | 27.259        | 0.005         | 2.357         | 2.357         | 7.071         | 2.304         | 0            | 14.292        | 0             | 0.005         | 3.018         | 0.544         |
| Sweden              | 9.811         | 0.192         | 0.283         | 0.283         | 0.850         | 0             | 0            | 16.379        | 0             | 0             | 0.374         | 6.68          |
| Switzerland         | 0.087         | 0             | 0.624         | 0.624         | 1.871         | 0             | 0            | 13.852        | 0             | 0             | 1.186         | 2.1968        |
| Ukraine             | 1.402         | 0             | 1.466         | 1.466         | 4.399         | 0             | 0            | 4.666         | 0             | 0             | 0             | 1.607         |
| United Kingdom      | 13.740        | 10.428        | 2.713         | 2.713         | 8.138         | 0             | 0            | 1.879         | 0             | 0.022         | 1.01          | 0.5247        |
| <b>Haiti Region</b> | <b>0.370</b>  | <b>0</b>      | <b>0.075</b>  | <b>0.075</b>  | <b>0.224</b>  | <b>0</b>      | <b>0</b>     | <b>0.676</b>  | <b>0</b>      | <b>0</b>      | <b>0</b>      | <b>0</b>      |
| Dominican Rep.      | 0.370         | 0             | 0.074         | 0.074         | 0.222         | 0             | 0            | 0.616         | 0             | 0             | 0             | 0             |
| Haiti               | 0             | 0             | 0.001         | 0.001         | 0.002         | 0             | 0            | 0.06          | 0             | 0             | 0             | 0             |
| <b>Iceland</b>      | <b>0.002</b>  | <b>0</b>      | <b>0.001</b>  | <b>0.001</b>  | <b>0.004</b>  | <b>0</b>      | <b>0.756</b> | <b>2.086</b>  | <b>0</b>      | <b>0</b>      | <b>0</b>      | <b>2.373</b>  |
| <b>India Region</b> | <b>38.880</b> | <b>0</b>      | <b>7.915</b>  | <b>7.915</b>  | <b>23.744</b> | <b>0.2285</b> | <b>0</b>     | <b>49.08</b>  | <b>0</b>      | <b>0</b>      | <b>9.457</b>  | <b>0.3612</b> |
| Bangladesh          | 0.003         | 0             | 0.060         | 0.060         | 0.181         | 0             | 0            | 0.23          | 0             | 0             | 0             | 0             |
| India               | 38.625        | 0             | 7.797         | 7.797         | 23.390        | 0.2285        | 0            | 45.763        | 0             | 0             | 9.457         | 0.3576        |
| Nepal               | 0             | 0             | 0.012         | 0.012         | 0.036         | 0             | 0            | 1.278         | 0             | 0             | 0             | 0.0036        |
| Sri Lanka           | 0.252         | 0             | 0.046         | 0.046         | 0.138         | 0             | 0            | 1.809         | 0             | 0             | 0             | 0             |
| <b>Israel</b>       | <b>0.027</b>  | <b>0</b>      | <b>0.238</b>  | <b>0.238</b>  | <b>0.714</b>  | <b>0.248</b>  | <b>0</b>     | <b>0.007</b>  | <b>0</b>      | <b>0</b>      | <b>3.351</b>  | <b>0.0824</b> |
| <b>Jamaica</b>      | <b>0.099</b>  | <b>0</b>      | <b>0.019</b>  | <b>0.019</b>  | <b>0.056</b>  | <b>0</b>      | <b>0</b>     | <b>0.03</b>   | <b>0</b>      | <b>0</b>      | <b>0</b>      | <b>0</b>      |
| <b>Japan</b>        | <b>4.373</b>  | <b>0.085</b>  | <b>13.400</b> | <b>13.400</b> | <b>40.200</b> | <b>0</b>      | <b>0.525</b> | <b>22.379</b> | <b>0</b>      | <b>0</b>      | <b>2.58</b>   | <b>2.5705</b> |
| <b>Mauritius</b>    | <b>0.011</b>  | <b>0</b>      | <b>0.017</b>  | <b>0.017</b>  | <b>0.050</b>  | <b>0</b>      | <b>0</b>     | <b>0.061</b>  | <b>0</b>      | <b>0</b>      | <b>0.093</b>  | <b>0</b>      |
| <b>Mideast</b>      | <b>10.262</b> | <b>0</b>      | <b>2.415</b>  | <b>2.415</b>  | <b>7.246</b>  | <b>0.2011</b> | <b>1.613</b> | <b>48.849</b> | <b>0</b>      | <b>0</b>      | <b>19.061</b> | <b>3.7754</b> |
| Armenia             | 0.003         | 0             | 0.019         | 0.019         | 0.057         | 0             | 0            | 1.293         | 0             | 0             | 0             | 0.0015        |
| Azerbaijan          | 0.066         | 0             | 0.008         | 0.008         | 0.024         | 0             | 0            | 1.131         | 0             | 0             | 0             | 0             |
| Bahrain             | 0.001         | 0             | 0.002         | 0.002         | 0.006         | 0             | 0            | 0             | 0             | 0             | 0             | 0             |
| Iran                | 0.303         | 0             | 0.083         | 0.083         | 0.248         | 0             | 0            | 11.129        | 0             | 0             | 0             | 0.0822        |
| Iraq                | 0             | 0             | 0.043         | 0.043         | 0.130         | 0             | 0            | 2.513         | 0             | 0             | 0             | 0             |
| Jordan              | 0.515         | 0             | 0.272         | 0.272         | 0.815         | 0             | 0            | 0.012         | 0             | 0             | 0.882         | 0.1533        |

|                       |               |              |               |               |               |              |               |               |               |              |               |               |
|-----------------------|---------------|--------------|---------------|---------------|---------------|--------------|---------------|---------------|---------------|--------------|---------------|---------------|
| Kuwait                | 0.012         | 0            | 0.009         | 0.009         | 0.026         | 0.05         | 0             | 0             | 0             | 0            | 0             | 0             |
| Lebanon               | 0.003         | 0            | 0.013         | 0.013         | 0.039         | 0            | 0             | 0.282         | 0             | 0            | 0.583         | 0             |
| Oman                  | 0.050         | 0            | 0.022         | 0.022         | 0.065         | 0            | 0             | 0             | 0             | 0            | 0             | 0             |
| Qatar                 | 0             | 0            | 0.001         | 0.001         | 0.003         | 0            | 0             | 0             | 0             | 0            | 0             | 0             |
| Saudi Arabia          | 0.003         | 0            | 0.072         | 0.072         | 0.215         | 0.05         | 0             | 0             | 0             | 0            | 0             | 0.045         |
| Syria                 | 0.001         | 0            | 0.000         | 0.000         | 0.001         | 0            | 0             | 1.505         | 0             | 0            | 0             | 0             |
| Turkey                | 9.305         | 0            | 1.333         | 1.333         | 4.000         | 0.001        | 1.613         | 30.984        | 0             | 0            | 17.596        | 3.4884        |
| UAE                   | 0             | 0            | 0.488         | 0.488         | 1.463         | 0.1001       | 0             | 0             | 0             | 0            | 0             | 0             |
| Yemen                 | 0             | 0            | 0.051         | 0.051         | 0.152         | 0            | 0             | 0             | 0             | 0            | 0             | 0.005         |
| <b>New Zealand</b>    | <b>0.784</b>  | <b>0</b>     | <b>0.028</b>  | <b>0.028</b>  | <b>0.085</b>  | <b>0</b>     | <b>0.984</b>  | <b>5.354</b>  | <b>0</b>      | <b>0</b>     | <b>0.112</b>  | <b>0.518</b>  |
| <b>Philippines</b>    | <b>0.443</b>  | <b>0</b>     | <b>0.210</b>  | <b>0.210</b>  | <b>0.629</b>  | <b>0</b>     | <b>1.9279</b> | <b>3.7</b>    | <b>0</b>      | <b>0</b>     | <b>0</b>      | <b>0.0017</b> |
| <b>Russia Region</b>  | 0.966         | 0            | 0.286         | 0.286         | 0.857         | 0            | 0.074         | 51.976        | 0             | 0.002        | 0.018         | 0.5022        |
| Georgia               | 0.021         | 0            | 0             | 0             | 0.001         | 0            | 0             | 3.449         | 0             | 0            | 0             | 0.0692        |
| Russia                | 0.945         | 0            | 0.286         | 0.286         | 0.857         | 0            | 0.074         | 48.527        | 0             | 0.002        | 0.018         | 0.433         |
| <b>South America</b>  | <b>25.769</b> | <b>0</b>     | <b>2.524</b>  | <b>2.524</b>  | <b>7.572</b>  | <b>0.1</b>   | <b>0.04</b>   | <b>175.63</b> | <b>0.0001</b> | <b>0</b>     | <b>11.590</b> | <b>0.6207</b> |
| Argentina             | 2.624         | 0            | 0.153         | 0.153         | 0.458         | 0            | 0             | 10.366        | 0             | 0            | 0.0311        | 0.2048        |
| Bolivia               | 0.027         | 0            | 0.024         | 0.024         | 0.072         | 0            | 0             | 0.735         | 0             | 0            | 0             | 0.001         |
| Brazil                | 17.750        | 0            | 1.576         | 1.576         | 4.729         | 0            | 0             | 109.24        | 0.0001        | 0            | 11.258        | 0.3634        |
| Chile                 | 2.829         | 0            | 0.621         | 0.621         | 1.864         | 0.1          | 0.04          | 6.945         | 0             | 0            | 0.248         | 0.0226        |
| Colombia              | 0.510         | 0            | 0.021         | 0.021         | 0.064         | 0            | 0             | 11.941        | 0             | 0            | 0             | 0.02          |
| Curacao               | 0.047         | 0            | 0.002         | 0.002         | 0.007         | 0            | 0             | 0             | 0             | 0            | 0             | 0             |
| Ecuador               | 0.021         | 0            | 0.006         | 0.006         | 0.017         | 0            | 0             | 5.076         | 0             | 0            | 0             | 0.0052        |
| Paraguay              | 0             | 0            | 0.000         | 0.000         | 0.000         | 0            | 0             | 8.81          | 0             | 0            | 0             | 0             |
| Peru                  | 0.376         | 0            | 0.066         | 0.066         | 0.199         | 0            | 0             | 5.396         | 0             | 0            | 0             | 0.003         |
| Suriname              | 0             | 0            | 0.001         | 0.001         | 0.004         | 0            | 0             | 0.19          | 0             | 0            | 0             | 0             |
| Trinidad/Tobago       | 0             | 0            | 0.001         | 0.001         | 0.002         | 0            | 0             | 0             | 0             | 0            | 0             | 0             |
| Uruguay               | 1.514         | 0            | 0.051         | 0.051         | 0.154         | 0            | 0             | 1.538         | 0             | 0            | 0.053         | 0             |
| Venezuela             | 0.071         | 0            | 0.001         | 0.001         | 0.003         | 0            | 0             | 15.393        | 0             | 0            | 0             | 0.0007        |
| <b>Southeast Asia</b> | <b>2.206</b>  | <b>0.099</b> | <b>4.359</b>  | <b>4.359</b>  | <b>13.078</b> | <b>0.005</b> | <b>2.1313</b> | <b>45.057</b> | <b>0</b>      | <b>0</b>     | <b>0.11</b>   | <b>0.154</b>  |
| Brunei                | 0             | 0            | 0.000         | 0.000         | 0.001         | 0            | 0             | 0             | 0             | 0            | 0             | 0             |
| Cambodia              | 0             | 0            | 0.042         | 0.042         | 0.125         | 0            | 0             | 1.33          | 0             | 0            | 0             | 0             |
| Indonesia             | 0.154         | 0            | 0.034         | 0.034         | 0.103         | 0            | 2.131         | 6.121         | 0             | 0            | 0             | 0.0023        |
| Lao PDR               | 0             | 0            | 0.004         | 0.004         | 0.013         | 0            | 0             | 7.376         | 0             | 0            | 0             | 0             |
| Malaysia              | 0             | 0            | 0.299         | 0.299         | 0.896         | 0            | 0             | 6.275         | 0             | 0            | 0             | 0.005         |
| Myanmar               | 0             | 0            | 0.017         | 0.017         | 0.050         | 0            | 0             | 3.331         | 0             | 0            | 0             | 0             |
| Singapore             | 0.001         | 0            | 0.066         | 0.066         | 0.197         | 0            | 0             | 0             | 0             | 0            | 0             | 0             |
| Thailand              | 1.538         | 0            | 0.597         | 0.597         | 1.790         | 0.005        | 0.0003        | 3.513         | 0             | 0            | 0.11          | 0.1285        |
| Vietnam               | 0.513         | 0.099        | 3.301         | 3.301         | 9.902         | 0            | 0             | 17.111        | 0             | 0            | 0             | 0.0182        |
| <b>South Korea</b>    | <b>1.515</b>  | <b>0.136</b> | <b>2.915</b>  | <b>2.915</b>  | <b>8.745</b>  | <b>0</b>     | <b>0</b>      | <b>1.806</b>  | <b>0</b>      | <b>0.256</b> | <b>1.324</b>  | <b>1.4898</b> |
| <b>Taiwan</b>         | <b>0.726</b>  | <b>0.128</b> | <b>1.163</b>  | <b>1.163</b>  | <b>3.490</b>  | <b>0</b>     | <b>0</b>      | <b>2.092</b>  | <b>0</b>      | <b>0</b>     | <b>1.22</b>   | <b>0.0001</b> |
| <b>United States</b>  | <b>122.28</b> | <b>0.042</b> | <b>14.763</b> | <b>14.763</b> | <b>44.288</b> | <b>1.758</b> | <b>2.587</b>  | <b>79.145</b> | <b>0</b>      | <b>0</b>     | <b>17.935</b> | <b>20.713</b> |
| <b>All regions</b>    | <b>712.72</b> | <b>35.50</b> | <b>141.20</b> | <b>141.20</b> | <b>423.61</b> | <b>6.47</b>  | <b>14.01</b>  | <b>1,164</b>  | <b>0.0006</b> | <b>0.53</b>  | <b>456.40</b> | <b>107.72</b> |

Onshore and offshore wind, solar PV, CSP, geothermal electricity, and wave electricity are from IRENA (2021). Due to a lack of data, existing solar PV is assumed to be split 20% residential rooftop PV, 20% commercial/govt. rooftop PV, and 60% utility PV. Hydropower values are from IHA (2021). Solar thermal values are for 2018 and from Weiss and Spork-Dur, (2020). Tidal values are from various sources. Geothermal heat values are for 2019 and from Lund and Toth (2020).

**Table S9.** Final 2050 total (existing plus new) nameplate capacity (GW) by generator needed in each country and region to supply 100% of all load plus losses continuously with WWS across all energy sectors in each region (as determined by LOADMATCH). Nameplate capacity equals the maximum possible instantaneous discharge rate. The nameplate capacity for each generator in each region multiplied by the mean capacity factor for the generator in the region (Table S11) gives the simulation-averaged power output from the generator in the region (Table S12).

| Region or country      | On-shore wind | Off-shore wind | Res-ident-ial roof PV | Com /gov roof PV | Util-ity PV   | CSP with stor-age | Geo-ther-mal elec-tricity | Hydro         | Wav-e        | Tidal        | Solar-ther-mal | Geo-ther-mal heat |
|------------------------|---------------|----------------|-----------------------|------------------|---------------|-------------------|---------------------------|---------------|--------------|--------------|----------------|-------------------|
| <b>Africa</b>          | <b>489.9</b>  | <b>154.1</b>   | <b>357.62</b>         | <b>641.51</b>    | <b>549.57</b> | <b>28.17</b>      | <b>3.61</b>               | <b>31.52</b>  | <b>3.604</b> | <b>0.839</b> | <b>2.654</b>   | <b>0.194</b>      |
| Algeria                | 33.52         | 5.26           | 30.74                 | 70.79            | 59.61         | 2.48              | 0                         | 0.269         | 0.347        | 0.020        | 0              | 0.078             |
| Angola                 | 19.73         | 3.91           | 3.28                  | 7.16             | 2.53          | 0.35              | 0                         | 3.836         | 0.053        | 0.027        | 0              | 0                 |
| Benin                  | 5.77          | 1.72           | 3.07                  | 4.25             | 3.51          | 0.25              | 0                         | 0.033         | 0.058        | 0.005        | 0              | 0                 |
| Botswana               | 2.51          | 0.00           | 1.20                  | 2.71             | 2.77          | 0.12              | 0                         | 0             | 0            | 0            | 0.009          | 0                 |
| Cameroon               | 12.60         | 0.58           | 2.52                  | 5.50             | 4.82          | 0.27              | 0                         | 0.822         | 0.065        | 0.011        | 0              | 0                 |
| Congo                  | 4.54          | 1.26           | 0.97                  | 2.15             | 1.13          | 0                 | 0                         | 0.218         | 0.026        | 0.006        | 0              | 0                 |
| Congo, DR              | 25.84         | 0.83           | 5.07                  | 11.15            | 10.83         | 0.54              | 0                         | 2.760         | 0.093        | 0.002        | 0              | 0                 |
| Côte d'Ivoire          | 14.95         | 2.31           | 2.87                  | 6.27             | 3.28          | 0.31              | 0                         | 0.879         | 0.081        | 0.013        | 0              | 0                 |
| Egypt                  | 62.57         | 37.16          | 51.41                 | 117.74           | 59.33         | 4.51              | 0                         | 2.876         | 0            | 0.036        | 0              | 0.044             |
| Equator. Guinea        | 1.34          | 4.39           | 7.57                  | 3.40             | 10.55         | 0.35              | 0                         | 0.128         | 0.083        | 0.009        | 0              | 0                 |
| Eritrea                | 0.31          | 0.10           | 0.19                  | 0.42             | 0.21          | 0.02              | 0                         | 0             | 0            | 0.008        | 0              | 0                 |
| Ethiopia               | 19.72         | 0.00           | 9.73                  | 21.20            | 21.96         | 1.00              | 1.71                      | 4.074         | 0            | 0            | 0              | 0.002             |
| Gabon                  | 12.96         | 10.41          | 7.70                  | 8.03             | 8.94          | 0                 | 0                         | 0.331         | 0.135        | 0.018        | 0              | 0                 |
| Ghana                  | 11.87         | 4.49           | 7.43                  | 15.95            | 8.47          | 0.62              | 0                         | 1.584         | 0.144        | 0.013        | 0.002          | 0                 |
| Kenya                  | 17.37         | 3.51           | 4.81                  | 10.67            | 5.60          | 0.55              | 1.81                      | 0.837         | 0.154        | 0.013        | 0              | 0.019             |
| Libya                  | 12.87         | 8.14           | 11.47                 | 23.97            | 12.51         | 0.93              | 0                         | 0             | 0            | 0.029        | 0              | 0                 |
| Morocco                | 14.27         | 7.30           | 12.69                 | 29.29            | 14.68         | 1.11              | 0                         | 1.305         | 0.147        | 0.030        | 0.316          | 0.005             |
| Mozambique             | 7.97          | 1.43           | 2.20                  | 4.89             | 2.53          | 0.26              | 0                         | 2.216         | 0.032        | 0.125        | 0.002          | 0                 |
| Namibia                | 2.89          | 0.70           | 1.23                  | 2.78             | 1.42          | 0.14              | 0                         | 0.347         | 0.015        | 0.027        | 0.032          | 0                 |
| Niger                  | 2.09          | 0              | 1.28                  | 2.82             | 2.92          | 0.12              | 0                         | 0             | 0            | 0            | 0              | 0                 |
| Nigeria                | 45.09         | 0              | 67.76                 | 147.71           | 154.54        | 4.98              | 0                         | 2.111         | 1.235        | 0.018        | 0.003          | 0.001             |
| Senegal                | 3.22          | 0.94           | 1.66                  | 3.64             | 1.90          | 0.17              | 0                         | 0.081         | 0.042        | 0.013        | 0.003          | 0                 |
| South Africa           | 88.88         | 47.49          | 86.51                 | 72.38            | 100.01        | 6.06              | 0                         | 0.684         | 0.674        | 0.039        | 1.521          | 0.002             |
| South Sudan            | 0.33          | 0              | 0.25                  | 0.55             | 0.57          | 0.02              | 0                         | 0             | 0            | 0            | 0              | 0                 |
| Sudan                  | 9.60          | 3.82           | 7.41                  | 16.31            | 8.48          | 0.66              | 0                         | 1.923         | 0            | 0.018        | 0              | 0                 |
| Tanzania               | 17.06         | 5.31           | 7.86                  | 17.20            | 8.96          | 0.70              | 0                         | 0.596         | 0.194        | 0.333        | 0              | 0                 |
| Togo                   | 2.84          | 0.71           | 1.30                  | 1.65             | 1.48          | 0.10              | 0                         | 0.049         | 0.024        | 0.003        | 0              | 0                 |
| Tunisia                | 7.31          | 2.34           | 8.80                  | 14.44            | 16.27         | 0.63              | 0                         | 0.066         | 0            | 0.022        | 0.724          | 0.044             |
| Zambia                 | 20.39         | 0              | 4.85                  | 10.63            | 11.09         | 0.57              | 0.09                      | 2.400         | 0            | 0            | 0              | 0                 |
| Zimbabwe               | 9.49          | 0              | 3.78                  | 5.90             | 8.67          | 0.36              | 0                         | 1.091         | 0            | 0            | 0.042          | 0                 |
| <b>Australia</b>       | <b>80.30</b>  | <b>19.21</b>   | <b>38.04</b>          | <b>65.16</b>     | <b>257.68</b> | <b>4.86</b>       | <b>0.40</b>               | <b>7.450</b>  | <b>0.576</b> | <b>0.500</b> | <b>6.451</b>   | <b>0.094</b>      |
| <b>Canada</b>          | <b>173.6</b>  | <b>36.29</b>   | <b>14.01</b>          | <b>103.44</b>    | <b>41.70</b>  | <b>0</b>          | <b>5.00</b>               | <b>81.82</b>  | <b>0.926</b> | <b>2.000</b> | <b>0.637</b>   | <b>1.831</b>      |
| <b>Central America</b> | <b>428.0</b>  | <b>95.83</b>   | <b>52.50</b>          | <b>118.26</b>    | <b>258.82</b> | <b>8.29</b>       | <b>10.69</b>              | <b>19.86</b>  | <b>2.461</b> | <b>0.337</b> | <b>3.027</b>   | <b>0.166</b>      |
| Costa Rica             | 8.31          | 1.85           | 0.63                  | 1.38             | 3.10          | 0.11              | 1.19                      | 2.331         | 0.031        | 0.024        | 0              | 0.002             |
| El Salvador            | 5.75          | 0.68           | 0.46                  | 1.02             | 2.28          | 0.08              | 1.02                      | 0.575         | 0.022        | 0.009        | 0              | 0.003             |
| Guatemala              | 16.87         | 1.89           | 1.15                  | 2.53             | 5.63          | 0.20              | 2.26                      | 1.559         | 0.054        | 0.011        | 0              | 0.002             |
| Honduras               | 14.29         | 1.53           | 1.01                  | 2.22             | 4.95          | 0.17              | 0.59                      | 0.837         | 0.046        | 0.018        | 0              | 0.002             |
| Mexico                 | 346.0         | 83.47          | 46.92                 | 106.05           | 231.51        | 7.35              | 5.18                      | 12.61         | 2.195        | 0.100        | 3.027          | 0.156             |
| Nicaragua              | 7.11          | 0.91           | 0.49                  | 1.07             | 2.39          | 0.08              | 0.45                      | 0.157         | 0.022        | 0.019        | 0              | 0                 |
| Panama                 | 29.74         | 5.50           | 1.84                  | 4.00             | 8.97          | 0.31              | 0                         | 1.786         | 0.092        | 0.157        | 0              | 0                 |
| <b>Central Asia</b>    | <b>193.2</b>  | <b>21.23</b>   | <b>118.50</b>         | <b>161.50</b>    | <b>239.79</b> | <b>8.01</b>       | <b>0</b>                  | <b>24.96</b>  | <b>1.669</b> | <b>0.021</b> | <b>0</b>       | <b>0.003</b>      |
| Kazakhstan             | 50.77         | 0              | 15.38                 | 39.81            | 37.11         | 0                 | 0                         | 2.730         | 0            | 0            | 0              | 0                 |
| Kyrgyz Republic        | 3.91          | 0              | 0.93                  | 2.32             | 2.52          | 0.13              | 0                         | 3.892         | 0            | 0            | 0              | 0                 |
| Pakistan               | 91.85         | 21.23          | 89.09                 | 86.92            | 166.09        | 6.19              | 0                         | 9.929         | 1.669        | 0.021        | 0              | 0                 |
| Tajikistan             | 1.46          | 0              | 0.36                  | 0.89             | 0.98          | 0.05              | 0                         | 6.395         | 0            | 0            | 0              | 0.003             |
| Turkmenistan           | 14.32         | 0              | 4.04                  | 9.88             | 10.46         | 0.52              | 0                         | 0.005         | 0            | 0            | 0              | 0                 |
| Uzbekistan             | 30.88         | 0              | 8.69                  | 21.67            | 22.63         | 1.12              | 0                         | 2.005         | 0            | 0            | 0              | 0                 |
| <b>China Region</b>    | <b>2,100</b>  | <b>735.4</b>   | <b>1,016.</b>         | <b>989.79</b>    | <b>4,296</b>  | <b>128.30</b>     | <b>1.86</b>               | <b>343.70</b> | <b>8.711</b> | <b>2.174</b> | <b>337.6</b>   | <b>40.63</b>      |
| China                  | 2,082         | 640.7          | 1,011.                | 983.84           | 4,245         | 128.19            | 1.86                      | 338.7         | 8.375        | 2.000        | 337.6          | 40.61             |



|                     |              |              |               |               |               |              |             |              |              |              |              |              |
|---------------------|--------------|--------------|---------------|---------------|---------------|--------------|-------------|--------------|--------------|--------------|--------------|--------------|
| Hong Kong           | 0.14         | 93.03        | 0.93          | 0.43          | 35.56         | 0            | 0           | 0            | 0.336        | 0.016        | 0            | 0            |
| Korea, DPR          | 10.16        | 1.73         | 2.18          | 2.32          | 7.58          | 0.11         | 0           | 5.010        | 0            | 0.157        | 0            | 0            |
| Mongolia            | 7.08         | 0            | 1.24          | 3.20          | 7.96          | 0            | 0           | 0.023        | 0            | 0            | 0            | 0.023        |
| <b>Cuba</b>         | <b>17.61</b> | <b>4.82</b>  | <b>4.76</b>   | <b>14.94</b>  | <b>19.15</b>  | <b>0.48</b>  | <b>0</b>    | <b>0.068</b> | <b>0.051</b> | <b>0.047</b> | <b>0</b>     | <b>0</b>     |
| <b>Europe</b>       | <b>1,174</b> | <b>450.0</b> | <b>337.79</b> | <b>500.75</b> | <b>1,109.</b> | <b>16.17</b> | <b>3.19</b> | <b>166.3</b> | <b>4.816</b> | <b>5.570</b> | <b>39.17</b> | <b>31.64</b> |
| Albania             | 1.72         | 0.49         | 0.52          | 1.71          | 0.87          | 0.08         | 0           | 2.390        | 0            | 0.010        | 0.181        | 0.016        |
| Austria             | 30.07        | 0            | 8.05          | 10.84         | 26.80         | 0            | 0           | 9.001        | 0            | 0            | 3.583        | 1.096        |
| Belarus             | 17.29        | 0            | 4.00          | 5.94          | 33.71         | 0            | 0.01        | 0.097        | 0            | 0            | 0            | 0.010        |
| Belgium             | 10.33        | 15.66        | 2.05          | 2.88          | 108.62        | 0            | 0           | 0.120        | 0            | 0.003        | 0.483        | 0.306        |
| Bosnia-Herzeg.      | 3.10         | 0.45         | 1.23          | 4.14          | 3.22          | 0.05         | 0           | 2.093        | 0            | 0.002        | 0            | 0.036        |
| Bulgaria            | 13.00        | 8.26         | 4.27          | 8.78          | 7.19          | 0            | 0           | 1.725        | 0            | 0.010        | 0.100        | 0.109        |
| Croatia             | 3.37         | 0.00         | 3.77          | 5.57          | 12.66         | 0.22         | 0.01        | 1.848        | 0            | 0.066        | 0.161        | 0.079        |
| Cyprus              | 0.66         | 1.49         | 1.10          | 1.63          | 1.86          | 0.09         | 0           | 0            | 0.028        | 0.015        | 0.551        | 0.010        |
| Czech Rep.          | 22.62        | 0            | 6.24          | 9.64          | 42.83         | 0            | 0           | 1.097        | 0            | 0            | 0.781        | 0.325        |
| Denmark             | 15.80        | 5.30         | 2.58          | 2.22          | 12.58         | 0            | 0           | 0.009        | 0.154        | 0.073        | 1.175        | 0.744        |
| Estonia             | 3.32         | 1.73         | 0.67          | 0.84          | 2.84          | 0            | 0           | 0.008        | 0            | 0.048        | 0.012        | 0.063        |
| Finland             | 44.15        | 12.21        | 3.34          | 2.63          | 26.64         | 0            | 0           | 3.263        | 0            | 0.023        | 0.048        | 2.300        |
| France              | 125.5        | 44.99        | 56.85         | 76.37         | 98.84         | 4.48         | 0.04        | 19.67        | 0.807        | 1.000        | 1.951        | 2.598        |
| Germany             | 231.5        | 72.21        | 49.11         | 80.75         | 164.39        | 0            | 0.04        | 4.658        | 1.129        | 0.035        | 13.88        | 4.806        |
| Gibraltar           | 0.00         | 8.44         | 0.00          | 0.00          | 0.15          | 0            | 0           | 0            | 0.018        | 0.001        | 0            | 0            |
| Greece              | 22.13        | 4.09         | 3.75          | 11.85         | 6.35          | 0.65         | 0.45        | 2.697        | 0.187        | 0.109        | 3.299        | 0.260        |
| Hungary             | 8.35         | 0            | 7.82          | 10.57         | 38.74         | 0            | 0.38        | 0.056        | 0            | 0            | 0.229        | 1.024        |
| Ireland             | 13.11        | 3.64         | 4.98          | 2.02          | 9.31          | 0            | 0           | 0.237        | 0.051        | 0.025        | 0.233        | 0.201        |
| Italy               | 126.5        | 35.50        | 39.09         | 40.57         | 60.24         | 4.71         | 1.00        | 14.91        | 1.207        | 0.075        | 3.305        | 1.425        |
| Kosovo              | 1.42         | 0            | 0.28          | 0.94          | 0.92          | 0.02         | 0.80        | 0.092        | 0            | 0            | 0            | 0            |
| Latvia              | 4.99         | 1.31         | 1.40          | 1.45          | 2.25          | 0            | 0           | 1.576        | 0            | 0.013        | 0.011        | 0.002        |
| Lithuania           | 7.83         | 2.87         | 2.41          | 3.69          | 4.89          | 0            | 0           | 0.116        | 0            | 0.004        | 0.013        | 0.126        |
| Luxembourg          | 0.70         | 0            | 0.15          | 0.24          | 12.43         | 0            | 0           | 0.034        | 0            | 0            | 0.046        | 0.000        |
| Macedonia           | 1.53         | 0            | 1.01          | 2.44          | 3.41          | 0            | 0           | 0.674        | 0            | 0            | 0.068        | 0.047        |
| Malta               | 0.14         | 4.34         | 0.16          | 0.11          | 3.47          | 0.09         | 0           | 0            | 0.027        | 0.008        | 0.051        | 0            |
| Moldova             | 3.70         | 0            | 1.44          | 0.98          | 4.82          | 0            | 0           | 0.076        | 0            | 0            | 0            | 0            |
| Montenegro          | 0.83         | 0.20         | 0.23          | 0.76          | 0.37          | 0.01         | 0           | 0.658        | 0            | 0.009        | 0            | 0            |
| Netherlands         | 17.53        | 40.56        | 3.14          | 3.90          | 97.13         | 0            | 0           | 0.038        | 0            | 0.012        | 0.460        | 1.719        |
| Norway              | 9.44         | 2.54         | 3.97          | 1.39          | 6.32          | 0            | 0           | 31.56        | 0.046        | 0.158        | 0.031        | 1.150        |
| Poland              | 68.54        | 18.89        | 22.17         | 59.49         | 36.23         | 0            | 0.11        | 0.605        | 0            | 0.012        | 1.791        | 0.756        |
| Portugal            | 18.91        | 3.47         | 4.25          | 11.41         | 7.22          | 0.70         | 0.10        | 4.373        | 0.097        | 0.326        | 0.770        | 0.021        |
| Romania             | 27.43        | 6.22         | 7.67          | 12.24         | 12.46         | 0            | 0.10        | 6.221        | 0            | 0.008        | 0.143        | 0.245        |
| Serbia              | 5.30         | 0            | 5.50          | 10.25         | 18.16         | 0            | 0           | 2.484        | 0            | 0            | 0.000        | 0.115        |
| Slovakia            | 11.91        | 0            | 3.65          | 4.78          | 11.97         | 0            | 0           | 1.505        | 0            | 0            | 0.121        | 0.230        |
| Slovenia            | 5.97         | 1.04         | 1.36          | 2.89          | 2.68          | 0            | 0.10        | 1.344        | 0            | 0.003        | 0.104        | 0.266        |
| Spain               | 110.4        | 22.10        | 28.59         | 40.20         | 47.49         | 5.07         | 0.05        | 14.29        | 0.467        | 1.000        | 3.018        | 0.544        |
| Sweden              | 44.70        | 12.08        | 5.31          | 4.12          | 28.10         | 0            | 0           | 16.38        | 0            | 0.100        | 0.374        | 6.680        |
| Switzerland         | 16.58        | 0.00         | 3.30          | 11.34         | 11.01         | 0            | 0           | 13.85        | 0            | 0            | 1.186        | 2.197        |
| Ukraine             | 58.05        | 16.90        | 23.10         | 24.42         | 36.19         | 0            | 0           | 4.666        | 0            | 0.039        | 0            | 1.607        |
| United Kingdom      | 65.87        | 103.1        | 19.26         | 24.75         | 103.67        | 0            | 0           | 1.879        | 0.598        | 2.385        | 1.010        | 0.525        |
| <b>Haiti Region</b> | <b>5.31</b>  | <b>2.74</b>  | <b>2.26</b>   | <b>9.35</b>   | <b>18.19</b>  | <b>0.39</b>  | <b>0.68</b> | <b>0.676</b> | <b>0</b>     | <b>0.052</b> | <b>0</b>     | <b>0</b>     |
| Dominican Rep.      | 4.38         | 2.05         | 1.68          | 7.48          | 13.53         | 0.31         | 0.68        | 0.616        | 0            | 0.024        | 0            | 0            |
| Haiti               | 0.93         | 0.69         | 0.58          | 1.87          | 4.66          | 0.08         | 0           | 0.060        | 0            | 0.029        | 0            | 0            |
| <b>Iceland</b>      | <b>1.54</b>  | <b>0.00</b>  | <b>0.00</b>   | <b>0.00</b>   | <b>0.00</b>   | <b>0</b>     | <b>0.89</b> | <b>2.086</b> | <b>0.010</b> | <b>0.038</b> | <b>0</b>     | <b>2.373</b> |
| <b>India Region</b> | <b>651.2</b> | <b>108.2</b> | <b>86.51</b>  | <b>1,361.</b> | <b>2,158.</b> | <b>90.58</b> | <b>0.28</b> | <b>49.08</b> | <b>4.945</b> | <b>0.874</b> | <b>9.457</b> | <b>0.361</b> |
| Bangladesh          | 5.35         | 7.85         | 5.45          | 30.08         | 167.69        | 4.14         | 0           | 0.230        | 0.593        | 0.150        | 0            | 0            |
| India               | 629.7        | 96.97        | 79.10         | 1,305.        | 1,938         | 84.30        | 0.28        | 45.76        | 4.172        | 0.700        | 9.457        | 0.358        |
| Nepal               | 5.71         | 0            | 1.27          | 6.45          | 40.47         | 1.11         | 0           | 1.278        | 0            | 0            | 0            | 0.004        |
| Sri Lanka           | 10.44        | 3.34         | 0.69          | 19.52         | 11.78         | 1.04         | 0           | 1.809        | 0.179        | 0.024        | 0            | 0            |
| <b>Israel</b>       | <b>3.34</b>  | <b>5.42</b>  | <b>1.15</b>   | <b>14.32</b>  | <b>61.65</b>  | <b>0.64</b>  | <b>0</b>    | <b>0.007</b> | <b>0</b>     | <b>0.009</b> | <b>3.351</b> | <b>0.082</b> |
| <b>Jamaica</b>      | <b>0.38</b>  | <b>3.30</b>  | <b>2.74</b>   | <b>2.67</b>   | <b>3.50</b>   | <b>0.16</b>  | <b>0</b>    | <b>0.030</b> | <b>0</b>     | <b>0.020</b> | <b>0</b>     | <b>0</b>     |
| <b>Japan</b>        | <b>10.81</b> | <b>274.3</b> | <b>22.27</b>  | <b>14.99</b>  | <b>441.06</b> | <b>0.00</b>  | <b>1.46</b> | <b>22.38</b> | <b>2.487</b> | <b>2.200</b> | <b>2.580</b> | <b>2.571</b> |
| <b>Mauritius</b>    | <b>0.16</b>  | <b>3.73</b>  | <b>0.46</b>   | <b>0.26</b>   | <b>3.15</b>   | <b>0.04</b>  | <b>0</b>    | <b>0.061</b> | <b>0.013</b> | <b>0.007</b> | <b>0.093</b> | <b>0</b>     |
| <b>Mideast</b>      | <b>707.7</b> | <b>139.9</b> | <b>331.6</b>  | <b>356.13</b> | <b>1,674.</b> | <b>36.86</b> | <b>1.74</b> | <b>48.85</b> | <b>0.436</b> | <b>0.284</b> | <b>19.06</b> | <b>3.775</b> |
| Armenia             | 2.29         | 0            | 0.40          | 0.99          | 1.52          | 0.06         | 0.03        | 1.293        | 0            | 0            | 0            | 0.002        |
| Azerbaijan          | 9.18         | 0            | 3.25          | 8.04          | 12.44         | 0.13         | 0           | 1.131        | 0            | 0            | 0            | 0            |
| Bahrain             | 0.21         | 2.90         | 1.11          | 0.54          | 36.66         | 0.47         | 0           | 0            | 0            | 0.006        | 0            | 0            |

|                       |              |              |               |               |               |              |              |               |              |              |              |              |
|-----------------------|--------------|--------------|---------------|---------------|---------------|--------------|--------------|---------------|--------------|--------------|--------------|--------------|
| Iran                  | 241.1        | 44.01        | 122.63        | 112.38        | 287.48        | 10.03        | 0.01         | 11.13         | 0            | 0.036        | 0            | 0.082        |
| Iraq                  | 39.39        | 1.05         | 12.98         | 30.74         | 48.73         | 1.52         | 0            | 2.513         | 0            | 0.003        | 0            | 0            |
| Jordan                | 9.35         | 0.47         | 3.51          | 5.89          | 12.94         | 0.36         | 0            | 0.012         | 0            | 0.002        | 0.882        | 0.153        |
| Kuwait                | 1.34         | 9.00         | 3.17          | 1.99          | 99.55         | 1.28         | 0            | 0             | 0            | 0.013        | 0            | 0            |
| Lebanon               | 0.92         | 4.06         | 3.03          | 1.75          | 16.83         | 0.33         | 0            | 0.282         | 0            | 0.008        | 0.583        | 0            |
| Oman                  | 23.26        | 9.25         | 13.75         | 8.72          | 51.41         | 1.34         | 0            | 0             | 0.404        | 0.032        | 0            | 0            |
| Qatar                 | 0.87         | 10.16        | 1.85          | 1.04          | 129.93        | 1.57         | 0            | 0             | 0            | 0.014        | 0            | 0            |
| Saudi Arabia          | 186.9        | 29.09        | 116.03        | 89.55         | 408.99        | 9.37         | 0            | 0             | 0            | 0.038        | 0            | 0.045        |
| Syria                 | 8.45         | 2.14         | 2.75          | 6.58          | 5.29          | 0.32         | 0            | 1.505         | 0            | 0.007        | 0            | 0            |
| Turkey                | 142.4        | 3.58         | 31.25         | 76.64         | 107.78        | 4.22         | 1.61         | 30.98         | 0            | 0.072        | 17.60        | 3.488        |
| UAE                   | 40.03        | 23.77        | 14.80         | 8.93          | 451.20        | 5.76         | 0            | 0             | 0            | 0.024        | 0            | 0            |
| Yemen                 | 1.87         | 0.39         | 1.08          | 2.37          | 2.88          | 0.11         | 0.10         | 0             | 0.032        | 0.030        | 0            | 0.005        |
| <b>New Zealand</b>    | <b>21.47</b> | <b>1.68</b>  | <b>5.11</b>   | <b>6.97</b>   | <b>16.26</b>  | <b>0.59</b>  | <b>2.00</b>  | <b>5.354</b>  | <b>0.079</b> | <b>0.200</b> | <b>0.112</b> | <b>0.518</b> |
| <b>Philippines</b>    | <b>23.93</b> | <b>20.80</b> | <b>15.56</b>  | <b>55.72</b>  | <b>129.27</b> | <b>1.64</b>  | <b>5.73</b>  | <b>3.700</b>  | <b>0.576</b> | <b>0.500</b> | <b>0</b>     | <b>0.002</b> |
| <b>Russia Region</b>  | <b>487.0</b> | <b>50.24</b> | <b>55.49</b>  | <b>74.18</b>  | <b>143.96</b> | <b>0</b>     | <b>0.50</b>  | <b>51.976</b> | <b>1.936</b> | <b>0.359</b> | <b>0.018</b> | <b>0.502</b> |
| Georgia               | 3.96         | 0.32         | 0.36          | 0.91          | 0.95          | 0            | 0            | 3.449         | 0            | 0.009        | 0            | 0.069        |
| Russia                | 483.0        | 49.92        | 55.12         | 73.26         | 143.00        | 0            | 0.50         | 48.527        | 1.936        | 0.350        | 0.018        | 0.433        |
| <b>South America</b>  | <b>1,155</b> | <b>101.0</b> | <b>122.59</b> | <b>260.13</b> | <b>321.84</b> | <b>23.12</b> | <b>5.35</b>  | <b>175.63</b> | <b>4.809</b> | <b>1.198</b> | <b>11.59</b> | <b>0.621</b> |
| Argentina             | 66.49        | 9.14         | 11.81         | 28.53         | 29.57         | 2.35         | 1.01         | 10.366        | 0            | 0.057        | 0.031        | 0.205        |
| Bolivia               | 9.34         | 0            | 1.08          | 2.38          | 5.28          | 0.21         | 1.26         | 0.735         | 0            | 0            | 0            | 0.001        |
| Brazil                | 752.7        | 59.34        | 71.33         | 156.65        | 174.14        | 13.03        | 0            | 109.24        | 3.511        | 0.200        | 11.26        | 0.363        |
| Chile                 | 32.79        | 7.88         | 11.23         | 18.35         | 24.91         | 2.52         | 1.63         | 6.945         | 0.187        | 0.100        | 0.248        | 0.023        |
| Colombia              | 84.52        | 7.07         | 7.92          | 17.39         | 19.43         | 1.44         | 0            | 11.941        | 0.339        | 0.500        | 0            | 0.020        |
| Curacao               | 0.18         | 2.76         | 0.17          | 0.07          | 4.16          | 0.08         | 0            | 0.000         | 0            | 0.010        | 0            | 0            |
| Ecuador               | 30.72        | 1.24         | 2.13          | 4.71          | 8.77          | 0.42         | 0.04         | 5.076         | 0.056        | 0.221        | 0            | 0.005        |
| Paraguay              | 4.23         | 0            | 0.43          | 0.96          | 2.09          | 0.08         | 0            | 8.810         | 0            | 0            | 0            | 0            |
| Peru                  | 57.75        | 0.01         | 4.19          | 9.13          | 20.36         | 0.83         | 1.41         | 5.396         | 0.120        | 0.035        | 0            | 0.003        |
| Suriname              | 1.01         | 0.14         | 0.15          | 0.32          | 0.36          | 0.02         | 0            | 0.190         | 0.006        | 0.011        | 0            | 0            |
| Trinidad/Tobago       | 0.27         | 4.71         | 2.81          | 0.97          | 9.87          | 0.26         | 0            | 0             | 0.074        | 0.010        | 0            | 0            |
| Uruguay               | 8.10         | 0.85         | 1.18          | 2.77          | 2.90          | 0.23         | 0            | 1.538         | 0.069        | 0.015        | 0.053        | 0            |
| Venezuela             | 106.6        | 7.85         | 8.18          | 17.90         | 19.99         | 1.63         | 0            | 15.39         | 0.447        | 0.039        | 0            | 0.001        |
| <b>Southeast Asia</b> | <b>54.35</b> | <b>1,459</b> | <b>496.06</b> | <b>582.09</b> | <b>1,743.</b> | <b>28.92</b> | <b>13.76</b> | <b>45.06</b>  | <b>4.415</b> | <b>0.635</b> | <b>0.110</b> | <b>0.154</b> |
| Brunei                | 0.05         | 4.04         | 1.71          | 1.44          | 5.40          | 0.09         | 0            | 0             | 0.024        | 0.006        | 0            | 0            |
| Cambodia              | 1.57         | 6.96         | 4.74          | 10.36         | 14.87         | 0.41         | 0            | 1.330         | 0            | 0.012        | 0            | 0            |
| Indonesia             | 39.25        | 239.6        | 143.14        | 316.00        | 455.50        | 11.15        | 9.79         | 6.121         | 1.510        | 0.269        | 0            | 0.002        |
| Lao PDR               | 0.01         | 0            | 0.01          | 0.02          | 0.05          | 0.00         | 0            | 7.376         | 0            | 0            | 0            | 0            |
| Malaysia              | 2.84         | 210.8        | 94.47         | 67.49         | 328.97        | 4.66         | 0            | 6.275         | 1.163        | 0.054        | 0            | 0.005        |
| Myanmar               | 5.75         | 10.90        | 8.40          | 18.67         | 26.52         | 0.98         | 0            | 3.331         | 0.269        | 0.200        | 0            | 0            |
| Singapore             | 0.02         | 684.4        | 3.44          | 0.97          | 49.85         | 0            | 3.85         | 0             | 0            | 0.007        | 0            | 0            |
| Thailand              | 4.42         | 145.2        | 133.57        | 99.14         | 526.46        | 6.64         | 0.12         | 3.513         | 0            | 0.043        | 0.110        | 0.129        |
| Vietnam               | 0.43         | 157.0        | 106.60        | 68.00         | 335.68        | 4.99         | 0            | 17.11         | 1.449        | 0.045        | 0            | 0.018        |
| <b>South Korea</b>    | <b>2.14</b>  | <b>365.1</b> | <b>67.56</b>  | <b>162.82</b> | <b>353.77</b> | <b>8.89</b>  | <b>0</b>     | <b>1.806</b>  | <b>0</b>     | <b>1.000</b> | <b>1.324</b> | <b>1.490</b> |
| <b>Taiwan</b>         | <b>3.73</b>  | <b>104.9</b> | <b>34.06</b>  | <b>60.46</b>  | <b>119.82</b> | <b>0</b>     | <b>33.64</b> | <b>2.092</b>  | <b>0.914</b> | <b>0.027</b> | <b>1.220</b> | <b>.0001</b> |
| <b>United States</b>  | <b>1,645</b> | <b>263.6</b> | <b>239.15</b> | <b>355.17</b> | <b>2,286.</b> | <b>33.55</b> | <b>6.52</b>  | <b>79.15</b>  | <b>6.895</b> | <b>0.350</b> | <b>17.94</b> | <b>20.71</b> |
| <b>All regions</b>    | <b>9,430</b> | <b>4,421</b> | <b>3,422</b>  | <b>5,912</b>  | <b>16,244</b> | <b>419.7</b> | <b>97.3</b>  | <b>1,164</b>  | <b>50.3</b>  | <b>19.2</b>  | <b>456.4</b> | <b>107.7</b> |

**Table S10.** LOADMATCH capacity adjustment factors (CAFs), which show the ratio of the final nameplate capacity of a generator to meet load continuously, after running LOADMATCH, to the pre-LOADMATCH initial nameplate capacity estimated to meet load in the annual average. Thus, a CAF less than 1.0 means that the LOADMATCH-stabilized grid meeting continuous demand requires less than the nameplate capacity needed to meet annual average demand (which is our initial, pre-LOADMATCH nameplate-capacity assumption).

| Region          | (a)<br>Onshore<br>wind<br>CAF | (b)<br>Off-<br>shore<br>wind<br>CAF | (c)<br>Res.<br>Roof<br>PV<br>CAF | (d)<br>Com./Gov<br>Roof PV<br>CAF | (e)<br>Utility<br>PV<br>CAF | (f)<br>CSP<br>turbine<br>factor | (g)<br>Solar<br>Thermal<br>CAF |
|-----------------|-------------------------------|-------------------------------------|----------------------------------|-----------------------------------|-----------------------------|---------------------------------|--------------------------------|
| Africa          | 1.15                          | 1                                   | 1                                | 1                                 | 1                           | 1                               | 1                              |
| Australia       | 1.18                          | 0.7                                 | 0.75                             | 0.75                              | 1.95                        | 1                               | 1                              |
| Canada          | 1.15                          | 0.9                                 | 0.2                              | 0.7                               | 0.5                         | 0                               | 1                              |
| Central America | 1.7                           | 1.5                                 | 0.7                              | 0.7                               | 3                           | 1                               | 1                              |
| Central Asia    | 1.6                           | 0.9                                 | 0.85                             | 0.85                              | 1                           | 1                               | 0                              |
| China           | 1.4                           | 0.7                                 | 0.55                             | 0.55                              | 1.7                         | 1                               | 1                              |
| Cuba            | 1.9                           | 1.3                                 | 1                                | 1.4                               | 3.5                         | 1                               | 0                              |
| Europe          | 1.4                           | 1                                   | 0.68                             | 0.9                               | 1                           | 1                               | 1                              |
| Haiti           | 0.8                           | 0.9                                 | 0.5                              | 1                                 | 3.5                         | 1                               | 0                              |
| Iceland         | 0.44                          | 0.03                                | 0                                | 0                                 | 0                           | 0                               | 0                              |
| India           | 0.9                           | 0.6                                 | 0.1                              | 1.3                               | 1.5                         | 1.6                             | 1                              |
| Israel          | 1.3                           | 0.88                                | 0.1                              | 2.3                               | 2.6                         | 1                               | 1                              |
| Jamaica         | 0.8                           | 1.45                                | 0.9                              | 1                                 | 1                           | 1                               | 0                              |
| Japan           | 0.2                           | 2                                   | 0.2                              | 0.2                               | 1.7                         | 0                               | 1                              |
| Mauritius       | 1.6                           | 2.5                                 | 0.2                              | 0.2                               | 1.2                         | 0.4                             | 1                              |
| Mideast         | 2.1                           | 0.8                                 | 0.75                             | 0.75                              | 1.25                        | 1                               | 1                              |
| New Zealand     | 1.49                          | 0.4                                 | 0.6                              | 0.6                               | 1.65                        | 0.7                             | 1                              |
| Philippines     | 1.9                           | 0.9                                 | 0.55                             | 0.9                               | 4                           | 0.8                             | 0                              |
| Russia          | 1.8                           | 0.6                                 | 0.35                             | 0.35                              | 0.8                         | 0                               | 1                              |
| South America   | 1.25                          | 0.72                                | 0.6                              | 0.6                               | 1.28                        | 1                               | 1                              |
| Southeast Asia  | 0.2                           | 2                                   | 1                                | 1                                 | 2.75                        | 1                               | 1                              |
| South Korea     | 0.1                           | 2                                   | 0.9                              | 3.4                               | 1.2                         | 1                               | 1                              |
| Taiwan          | 0.5                           | 1.8                                 | 0.7                              | 2.5                               | 1.21                        | 0                               | 1                              |
| United States   | 1.7                           | 0.65                                | 0.45                             | 0.45                              | 2.4                         | 1                               | 1                              |

All generators not on this list have a CAF=1. Table S9 provides final nameplate capacities accounting for the CAFs. The initial estimated nameplate capacity of each generator in each country or region equals the final nameplate capacity divided by the CAF of the generator in the region that the country resides or in the region itself, respectively. The CAFs are also used to adjust the time-dependent wind and solar supplies provided from GATOR-GCMOM to LOADMATCH. Such supplies are calculated based on the initial nameplate capacities fed into LOADMATCH. The supplies from GATOR-GCMOM must be multiplied by the CAFs to be consistent with the new nameplate capacities used in LOADMATCH. Table S1 lists the countries in each region.

**Table S11.** Simulation-averaged 2050-2052 capacity factors (percentage of nameplate capacity produced as electricity before transmission, distribution or maintenance losses) by region in this study. The mean capacity factors in this table equal the simulation-averaged power output supplied by each generator in each region from Table S12 divided by the final nameplate capacity of each generator in each region from Table S9.

| Region          | Onshore wind | Off-shore wind | Rooftop PV   | Utility PV   | CSP with storage | Geo-thermal elec-tricity | Hydr opow-er | Wave         | Tidal        | Solar therm-al | Geo-thermal heat |
|-----------------|--------------|----------------|--------------|--------------|------------------|--------------------------|--------------|--------------|--------------|----------------|------------------|
| Africa          | 0.373        | 0.443          | 0.202        | 0.217        | 0.76             | 0.809                    | 0.437        | 0.175        | 0.223        | 0.111          | 0.54             |
| Australia       | 0.337        | 0.427          | 0.197        | 0.229        | 0.79             | 0.904                    | 0.477        | 0.332        | 0.247        | 0.109          | 0.54             |
| Canada          | 0.501        | 0.587          | 0.177        | 0.18         | --               | 0.862                    | 0.583        | 0.297        | 0.235        | 0.097          | 0.54             |
| Central America | 0.293        | 0.306          | 0.199        | 0.221        | 0.82             | 0.84                     | 0.439        | 0.126        | 0.229        | 0.12           | 0.54             |
| Central Asia    | 0.538        | 0.508          | 0.2          | 0.237        | 0.82             | --                       | 0.43         | 0.121        | 0.216        | --             | 0.54             |
| China           | 0.471        | 0.372          | 0.2          | 0.221        | 0.73             | 0.896                    | 0.489        | 0.139        | 0.243        | 0.109          | 0.54             |
| Cuba            | 0.423        | 0.306          | 0.166        | 0.178        | 0.7              | --                       | 0.449        | 0.379        | 0.232        | --             | --               |
| Europe          | 0.444        | 0.513          | 0.171        | 0.176        | 0.67             | 0.861                    | 0.467        | 0.203        | 0.237        | 0.093          | 0.54             |
| Haiti           | 0.321        | 0.428          | 0.213        | 0.232        | 0.79             | 0.876                    | 0.455        | --           | 0.216        | --             | --               |
| Iceland         | 0.573        | 0.625          | --           | --           | --               | 0.925                    | 0.611        | 0.313        | 0.253        | --             | 0.54             |
| India           | 0.454        | 0.411          | 0.197        | 0.227        | 0.78             | 0.857                    | 0.449        | 0.133        | 0.233        | 0.11           | 0.54             |
| Israel          | 0.47         | 0.365          | 0.236        | 0.259        | 0.89             | --                       | 0.484        | --           | 0.252        | 0.132          | 0.54             |
| Jamaica         | 0.344        | 0.388          | 0.213        | 0.23         | 0.79             | --                       | 0.408        | --           | 0.208        | --             | --               |
| Japan           | 0.388        | 0.449          | 0.177        | 0.20         | --               | 0.909                    | 0.479        | 0.141        | 0.248        | 0.097          | 0.54             |
| Mauritius       | 0.437        | 0.408          | 0.204        | 0.222        | 0.75             | --                       | 0.483        | 0.317        | 0.251        | 0.113          | --               |
| Mideast         | 0.49         | 0.492          | 0.221        | 0.251        | 0.86             | 0.798                    | 0.429        | 0.135        | 0.233        | 0.113          | 0.54             |
| New Zealand     | 0.506        | 0.563          | 0.177        | 0.197        | 0.65             | 0.885                    | 0.469        | 0.352        | 0.242        | 0.097          | 0.54             |
| Philippines     | 0.241        | 0.299          | 0.206        | 0.229        | 0.8              | 0.858                    | 0.453        | 0.133        | 0.234        | --             | 0.54             |
| Russia          | 0.478        | 0.579          | 0.173        | 0.197        | --               | 0.863                    | 0.473        | 0.256        | 0.236        | 0.095          | 0.54             |
| South America   | 0.177        | 0.362          | 0.189        | 0.207        | 0.72             | 0.883                    | 0.612        | 0.15         | 0.239        | 0.11           | 0.54             |
| Southeast Asia  | 0.124        | 0.217          | 0.199        | 0.214        | 0.73             | 0.879                    | 0.446        | 0.178        | 0.226        | 0.116          | 0.54             |
| South Korea     | 0.366        | 0.352          | 0.179        | 0.193        | 0.63             | --                       | 0.485        | --           | 0.251        | 0.097          | 0.54             |
| Taiwan          | 0.266        | 0.345          | 0.182        | 0.196        | --               | 0.927                    | 0.489        | 0.144        | 0.255        | 0.10           | 0.54             |
| United States   | 0.379        | 0.294          | 0.197        | 0.207        | 0.86             | 0.891                    | 0.47         | 0.294        | 0.244        | 0.104          | 0.54             |
| <b>Average</b>  | <b>0.401</b> | <b>0.343</b>   | <b>0.196</b> | <b>0.218</b> | <b>0.77</b>      | <b>0.887</b>             | <b>0.499</b> | <b>0.182</b> | <b>0.239</b> | <b>0.108</b>   | <b>0.54</b>      |

Capacity factors of offshore and onshore wind turbines account for array losses (extraction of kinetic energy by turbines). In all cases, capacity factors are before transmission, distribution, maintenance, storage, and shedding losses, which are summarized for each region in Tables S15 and S16. T&D loss rates are given in Table S17. The symbol "--" indicates no installation of the technology. Rooftop PV panels are fixed-tilt at the optimal tilt angle of the country they reside in; utility PV panels are half fixed optimal tilt and half single-axis horizontal tracking (Jacobson and Jadhav, 2018).

**Table S12.** LOADMATCH 2050-2052 simulation-averaged all-sector projected WWS end-use power supplied (which equals power consumed plus power lost due to transmission, distribution, and maintenance losses; storage losses; and shedding losses), by region and percentage of such supply met by each generator. Simulation-average power supply (GW) equals the simulation total energy supply (GWh/yr) divided by the number of hours of simulation. The percentages for each region add to 100%. Multiply each percentage by the 2050 total supply to obtain the GW supply by each generator. Divide the GW supply from each generator by its capacity factor (Table S11) to obtain the final 2050 nameplate capacity of each generator needed to meet the supply (Table S9). The 2050 total WWS supply is also obtained from Column (f) of Table S15.

| Region             | Annual average total WWS supply (GW) | On-shore wind (%) | Off-shore wind (%) | Roof PV (%)  | Utility PV (%) | CSP with storage (%) | Geothermal electricity (%) | Hydro power (%) | Wave (%)     | Tidal (%)    | Solar thermal heat (%) | Geothermal heat (%) |
|--------------------|--------------------------------------|-------------------|--------------------|--------------|----------------|----------------------|----------------------------|-----------------|--------------|--------------|------------------------|---------------------|
| Africa             | 611.1                                | 29.92             | 11.18              | 32.94        | 19.53          | 3.50                 | 0.48                       | 2.25            | 0.103        | 0.031        | 0.048                  | 0.017               |
| Australia          | 123.3                                | 21.96             | 6.66               | 16.48        | 47.77          | 3.10                 | 0.29                       | 2.89            | 0.155        | 0.100        | 0.568                  | 0.041               |
| Canada             | 190.5                                | 45.70             | 11.18              | 10.94        | 3.93           | --                   | 2.26                       | 25.05           | 0.144        | 0.247        | 0.032                  | 0.520               |
| Central America    | 271.5                                | 46.26             | 10.79              | 12.52        | 21.10          | 2.50                 | 3.31                       | 3.21            | 0.115        | 0.029        | 0.134                  | 0.033               |
| Central Asia       | 245.1                                | 42.44             | 4.40               | 22.87        | 23.16          | 2.67                 | --                         | 4.38            | 0.083        | 0.002        | --                     | 0.001               |
| China              | 2,936                                | 33.68             | 9.31               | 13.63        | 32.35          | 3.20                 | 0.06                       | 5.72            | 0.041        | 0.018        | 1.258                  | 0.748               |
| Cuba               | 16.0                                 | 46.57             | 9.22               | 20.42        | 21.30          | 2.12                 | --                         | 0.19            | 0.121        | 0.068        | --                     | --                  |
| Europe             | 1,206                                | 43.28             | 19.15              | 11.90        | 16.20          | 0.89                 | 0.23                       | 6.45            | 0.081        | 0.110        | 0.304                  | 1.418               |
| Haiti              | 10.8                                 | 15.78             | 10.89              | 22.96        | 39.04          | 2.86                 | 5.52                       | 2.85            | --           | 0.105        | --                     | --                  |
| Iceland            | 4.3                                  | 20.65             | 0.04               | --           | --             | --                   | 19.25                      | 29.79           | 0.073        | 0.225        | --                     | 29.98               |
| India              | 1,211                                | 24.42             | 3.68               | 23.55        | 40.49          | 5.86                 | 0.02                       | 1.82            | 0.054        | 0.017        | 0.086                  | 0.016               |
| Israel             | 24.2                                 | 6.48              | 8.16               | 15.11        | 65.86          | 2.35                 | --                         | 0.014           | --           | 0.009        | 1.821                  | 0.181               |
| Jamaica            | 3.5                                  | 3.73              | 36.43              | 32.84        | 22.93          | 3.60                 | --                         | 0.35            | --           | 0.120        | --                     | --                  |
| Japan              | 237.0                                | 1.77              | 52.00              | 2.79         | 37.28          | --                   | 0.56                       | 4.53            | 0.148        | 0.231        | 0.106                  | 0.586               |
| Mauritius          | 2.5                                  | 2.78              | 60.54              | 5.83         | 27.77          | 1.26                 | --                         | 1.17            | 0.168        | 0.064        | 0.419                  | --                  |
| Mideast            | 1,045                                | 33.18             | 6.58               | 14.55        | 40.10          | 3.04                 | 0.13                       | 2.01            | 0.006        | 0.006        | 0.205                  | 0.195               |
| New Zealand        | 22.2                                 | 49.00             | 4.27               | 9.64         | 14.45          | 1.71                 | 7.98                       | 11.31           | 0.125        | 0.218        | 0.049                  | 1.262               |
| Philippines        | 64.3                                 | 8.97              | 9.68               | 22.82        | 45.93          | 2.04                 | 7.65                       | 2.61            | 0.119        | 0.182        | --                     | 0.001               |
| Russia             | 338.3                                | 68.76             | 8.60               | 6.62         | 8.37           | --                   | 0.13                       | 7.28            | 0.146        | 0.025        | 0.001                  | 0.080               |
| South America      | 511.1                                | 39.94             | 7.15               | 14.18        | 13.03          | 3.25                 | 0.93                       | 21.02           | 0.141        | 0.056        | 0.250                  | 0.066               |
| Southeast Asia     | 966.6                                | 0.70              | 32.80              | 22.20        | 38.69          | 2.18                 | 1.25                       | 2.08            | 0.081        | 0.015        | 0.001                  | 0.009               |
| South Korea        | 246.4                                | 0.32              | 52.15              | 16.71        | 27.73          | 2.25                 | --                         | 0.36            | --           | 0.102        | 0.052                  | 0.327               |
| Taiwan             | 110.4                                | 0.90              | 32.77              | 15.61        | 21.31          | --                   | 28.24                      | 0.93            | 0.119        | 0.006        | 0.111                  | 0.000               |
| United States      | 1,379                                | 45.18             | 5.62               | 8.50         | 34.40          | 2.08                 | 0.42                       | 2.70            | 0.147        | 0.006        | 0.135                  | 0.812               |
| <b>All regions</b> | <b>11,776</b>                        | <b>32.10</b>      | <b>12.89</b>       | <b>15.56</b> | <b>30.02</b>   | <b>2.73</b>          | <b>0.73</b>                | <b>4.93</b>     | <b>0.078</b> | <b>0.039</b> | <b>0.419</b>           | <b>0.494</b>        |

**Table S13.** Aggregate (among all countries in each region) maximum instantaneous charge rates, maximum instantaneous discharge rates, and maximum energy storage capacities of the different types of electricity storage (PHS, CSP-PCM, batteries, hydropower), cold storage (CW-STES, ICE), and heat storage (HW-STES, UTES) technologies treated here, by region. Table S14 gives the maximum number of hours of storage at the maximum discharge rate. The product of the maximum discharge rate and hours of storage gives the maximum energy storage capacity. The maximum storage capacities are either of electricity for the electricity storage options or of thermal energy for the hot and cold storage options.

|                    | Africa             |                       |                          | Australia          |                       |                          | Canada             |                       |                          | Central America    |                       |                          |
|--------------------|--------------------|-----------------------|--------------------------|--------------------|-----------------------|--------------------------|--------------------|-----------------------|--------------------------|--------------------|-----------------------|--------------------------|
| Storage technology | Max charge rate GW | Max discharge rate GW | Max storage capacity TWh | Max charge rate GW | Max discharge rate GW | Max storage capacity TWh | Max charge rate GW | Max discharge rate GW | Max storage capacity TWh | Max charge rate GW | Max discharge rate GW | Max storage capacity TWh |
| PHS                | 27.8               | 27.8                  | 0.39                     | 10.7               | 10.7                  | 0.150                    | 16.6               | 16.6                  | 0.233                    | 6.00               | 6.00                  | 0.084                    |
| CSP-elec.          | 28.2               | 28.2                  | --                       | 4.86               | 4.86                  | --                       | 0                  | 0                     | --                       | 8.29               | 8.29                  | --                       |
| CSP-PCM            | 45.4               | --                    | 0.6                      | 7.84               | --                    | 0.110                    | 0                  | --                    | 0                        | 13.36              | --                    | 0.187                    |
| Batteries          | 750                | 750                   | 3.00                     | 250                | 250                   | 1.00                     | 100                | 100                   | 0.400                    | 1,100              | 1,100                 | 4.40                     |
| Hydropower         | 13.4               | 31.5                  | 117.2                    | 3.46               | 7.45                  | 30.3                     | 36.22              | 81.82                 | 317.3                    | 8.46               | 19.86                 | 74.1                     |
| CW-STES            | 3.77               | 3.77                  | 0.053                    | 0.208              | 0.208                 | 0.0029                   | 0.237              | 0.237                 | 0.0033                   | 0.668              | 0.668                 | 0.0094                   |
| ICE                | 5.66               | 5.66                  | 0.079                    | 0.312              | 0.312                 | 0.0044                   | 0.355              | 0.355                 | 0.0050                   | 1.00               | 1.00                  | 0.0140                   |
| HW-STES            | 143.9              | 143.9                 | 1.15                     | 9.17               | 9.17                  | 0.073                    | 24.17              | 24.17                 | 0.338                    | 27.66              | 27.66                 | 0.221                    |
| UTES-heat          | 2.85               | 143.92                | 103.6                    | 6.55               | 9.17                  | 0.880                    | 2.47               | 24.17                 | 5.801                    | 3.19               | 27.66                 | 0.664                    |
| UTES-elec.         | 143.9              | ----                  | --                       | 9.17               | --                    | --                       | 24.17              | --                    | --                       | 27.66              | --                    | --                       |
|                    | Central Asia       |                       |                          | China Region       |                       |                          | Cuba               |                       |                          | Europe             |                       |                          |
| PHS                | 12.0               | 12.0                  | 0.168                    | 126.2              | 126.2                 | 1.767                    | 3.00               | 3.00                  | 0.042                    | 208.1              | 208.1                 | 2.91                     |
| CSP-elec.          | 8.01               | 8.01                  | --                       | 128.3              | 128.3                 | --                       | 0.482              | 0.482                 | --                       | 16.17              | 16.17                 | --                       |
| CSP-PCM            | 12.92              | --                    | 0.181                    | 206.9              | --                    | 2.896                    | 0.777              | --                    | 0.011                    | 26.08              | --                    | 0.365                    |
| Batteries          | 730                | 730                   | 2.92                     | 2,600              | 2,600                 | 10.40                    | 100                | 100                   | 0.400                    | 1,200              | 1,200                 | 4.80                     |
| Hydropower         | 10.44              | 24.96                 | 91.4                     | 158.0              | 343.7                 | 1384.0                   | 0.030              | 0.068                 | 0.260                    | 75.36              | 166.3                 | 660.2                    |
| CW-STES            | 0.066              | 0.066                 | 0.0009                   | 11.30              | 11.30                 | 0.1583                   | 0.101              | 0.101                 | 0.0014                   | 4.44               | 4.44                  | 0.0621                   |
| ICE                | 0.098              | 0.098                 | 0.0014                   | 16.96              | 16.96                 | 0.2374                   | 0.152              | 0.152                 | 0.0021                   | 6.65               | 6.65                  | 0.0931                   |
| HW-STES            | 27.02              | 27.02                 | 0.216                    | 553.9              | 553.9                 | 2.770                    | 1.67               | 1.67                  | 0.013                    | 309.7              | 309.7                 | 1.858                    |
| UTES-heat          | 0.0029             | 27.02                 | 12.969                   | 378.2              | 553.9                 | 358.9                    | 0.00               | 1.67                  | 2.004                    | 70.80              | 309.7                 | 74.332                   |
| UTES-elec.         | 27.02              | ----                  | --                       | 553.9              | --                    | --                       | 1.67               | --                    | --                       | 309.7              | --                    | --                       |
|                    | Haiti              |                       |                          | Iceland            |                       |                          | India              |                       |                          | Israel             |                       |                          |
| PHS                | 2.00               | 2.00                  | 0.028                    | 0                  | 0                     | 0                        | 28.8               | 28.8                  | 0.403                    | 11.1               | 11.1                  | 0.155                    |
| CSP-elec.          | 0.389              | 0.389                 | --                       | 0                  | 0                     | --                       | 90.58              | 90.58                 | --                       | 0.643              | 0.643                 | --                       |
| CSP-PCM            | 0.63               | --                    | 0.009                    | 0                  | --                    | 0                        | 146.1              | --                    | 2.045                    | 1.04               | --                    | 0.015                    |
| Batteries          | 25                 | 25                    | 0.100                    | 0                  | 0                     | 0                        | 4,600              | 4,600                 | 18.40                    | 200                | 200                   | 0.800                    |
| Hydropower         | 0.300              | 0.676                 | 2.63                     | 0.99               | 2.09                  | 8.7                      | 21.44              | 49.08                 | 187.8                    | 0.0033             | 0.0070                | 0.0289                   |
| CW-STES            | 0.033              | 0.033                 | .00046                   | 0.018              | 0.018                 | 0.00025                  | 4.58               | 4.58                  | 0.0641                   | 0.109              | 0.109                 | 0.0015                   |
| ICE                | 0.049              | 0.049                 | .00069                   | 0.027              | 0.027                 | .00037                   | 6.87               | 6.87                  | 0.0962                   | 0.164              | 0.164                 | 0.0023                   |
| HW-STES            | 0                  | 0                     | 0                        | 1.05               | 1.05                  | 0.0084                   | 326.1              | 326.1                 | 2.608                    | 2.95               | 2.95                  | 0.024                    |
| UTES-heat          | 0                  | 3.97                  | 0.095                    | 0                  | 0                     | 0                        | 9.82               | 326.1                 | 70.43                    | 3.43               | 2.95                  | 1.063                    |
| UTES-elec.         | 3.97               | --                    | --                       | 0                  | --                    | --                       | 326.1              | --                    | --                       | 8.86               | --                    | --                       |
|                    | Jamaica            |                       |                          | Japan              |                       |                          | Mauritius          |                       |                          | Mideast            |                       |                          |
| PHS                | 3.00               | 3.00                  | 0.042                    | 176.7              | 176.7                 | 2.47                     | 40.0               | 40.0                  | 0.560                    | 14.5               | 14.5                  | 0.203                    |
| CSP-elec.          | 0.160              | 0.160                 | --                       | 0                  | 0                     | --                       | 0.042              | 0.042                 | --                       | 36.86              | 36.86                 | --                       |
| CSP-PCM            | 0.258              | --                    | 0.0036                   | 0                  | --                    | 0                        | 0.068              | --                    | 0.0010                   | 59.44              | --                    | 0.832                    |
| Batteries          | 6                  | 6                     | 0.0240                   | 480                | 480                   | 1.92                     | 3                  | 3                     | 0.0100                   | 2,300              | 2,300                 | 9.20                     |
| Hydropower         | 0.012              | 0.03                  | 0.1042                   | 10.45              | 22.38                 | 91.5                     | 0.029              | 0.061                 | 0.251                    | 20.42              | 48.85                 | 178.9                    |
| CW-STES            | 0                  | 0                     | 0                        | 0.133              | 0.133                 | 0.0019                   | 0.028              | 0.028                 | .00039                   | 1.15               | 1.15                  | 0.0161                   |
| ICE                | 0                  | 0                     | 0                        | 0.200              | 0.200                 | 0.0028                   | 0.042              | 0.042                 | .00059                   | 1.73               | 1.73                  | 0.0242                   |
| HW-STES            | 0.92               | 0.92                  | 0.0074                   | 21.31              | 21.31                 | 0.170                    | 0.101              | 0.101                 | 0.0008                   | 72.40              | 72.40                 | 0.579                    |
| UTES-heat          | 0                  | 0.92                  | 0.0665                   | 5.15               | 21.31                 | 2.557                    | 0.093              | 0.101                 | 0.0604                   | 22.84              | 72.40                 | 17.375                   |
| UTES-elec.         | 0.28               | --                    | --                       | 21.31              | --                    | --                       | 0.101              | --                    | --                       | 217.2              | --                    | --                       |
|                    | New Zealand        |                       |                          | Philippines        |                       |                          | Russia             |                       |                          | South America      |                       |                          |
| PHS                | 6.0                | 6.0                   | 0.084                    | 22.4               | 22.4                  | 0.314                    | 20.8               | 20.8                  | 0.292                    | 19.5               | 19.5                  | 0.273                    |
| CSP-elec.          | 0.59               | 0.59                  | --                       | 1.64               | 1.64                  | --                       | 0                  | 0                     | --                       | 23.12              | 23.12                 | --                       |
| CSP-PCM            | 0.94               | --                    | 0.013                    | 2.64               | --                    | 0.037                    | 0                  | --                    | 0                        | 37.28              | --                    | 0.522                    |

|            |                |        |        |             |       |        |        |       |        |               |        |        |
|------------|----------------|--------|--------|-------------|-------|--------|--------|-------|--------|---------------|--------|--------|
| Batteries  | 130            | 130    | 0.520  | 190         | 190   | 0.760  | 15     | 15    | 0.060  | 10            | 10     | 0.040  |
| Hydropower | 2.43           | 5.35   | 21.3   | 1.63        | 3.70  | 14.3   | 23.16  | 51.98 | 202.8  | 77.73         | 175.63 | 680.9  |
| CW-STES    | 0.0043         | 0.0043 | .00006 | 0.68        | 0.68  | 0.0095 | 1.27   | 1.27  | 0.0178 | 2.91          | 2.91   | 0.0408 |
| ICE        | 0.01           | 0.01   | 0.0001 | 1.02        | 1.02  | 0.0142 | 1.91   | 1.91  | 0.0267 | 4.37          | 4.37   | 0.0611 |
| HW-STES    | 1.07           | 1.07   | 0.009  | 26.50       | 26.50 | 0.212  | 99.22  | 99.22 | 0.992  | 61.69         | 61.69  | 0.493  |
| UTES-heat  | 0.63           | 1.07   | 0.257  | 0.00        | 26.50 | 9.541  | 0.52   | 99.22 | 11.91  | 12.21         | 61.69  | 44.415 |
| UTES-elec. | 1.07           | --     | --     | 5.30        | --    | --     | 99.22  | --    | --     | 61.69         | --     | --     |
|            | Southeast Asia |        |        | South Korea |       |        | Taiwan |       |        | United States |        |        |
| PHS        | 53.5           | 53.5   | 0.749  | 96.5        | 96.5  | 1.35   | 49.1   | 49.1  | 0.687  | 96.0          | 96.0   | 1.34   |
| CSP-elec.  | 28.92          | 28.92  | --     | 8.89        | 8.89  | --     | 0      | 0     | --     | 33.55         | 33.55  | --     |
| CSP-PCM    | 46.63          | --     | 0.653  | 14.33       | --    | 0.201  | 0      | --    | 0      | 54.09         | --     | 0.757  |
| Batteries  | 950            | 950    | 3.80   | 1,390       | 1,390 | 5.56   | 1,300  | 1,300 | 5.20   | 2,700         | 2,700  | 10.80  |
| Hydropower | 19.38          | 45.06  | 169.7  | 0.85        | 1.81  | 7.473  | 1.00   | 2.09  | 8.724  | 36.25         | 79.15  | 317.5  |
| CW-STES    | 3.23           | 3.23   | 0.0452 | 0.142       | 0.142 | 0.0020 | 0.23   | 0.23  | 0.0032 | 2.94          | 2.94   | 0.0412 |
| ICE        | 4.84           | 4.84   | 0.0678 | 0.213       | 0.213 | 0.0030 | 0.35   | 0.35  | 0.0049 | 4.41          | 4.41   | 0.0618 |
| HW-STES    | 129.6          | 129.6  | 1.037  | 18.16       | 18.16 | 0.145  | 20.42  | 20.42 | 0.163  | 167.3         | 167.3  | 1.338  |
| UTES-heat  | 0.264          | 129.6  | 15.549 | 2.81        | 18.16 | 4.360  | 1.22   | 20.42 | 4.900  | 38.65         | 167.3  | 40.14  |
| UTES-elec. | 129.6          | --     | --     | 18.16       | --    | --     | 20.42  | --    | --     | 167.3         | --     | --     |
|            | All regions    |        |        |             |       |        |        |       |        |               |        |        |
| PHS        | 1,050          | 1,050  | 14.70  |             |       |        |        |       |        |               |        |        |
| CSP-elec.  | 420            | 420    | --     |             |       |        |        |       |        |               |        |        |
| CSP-PCM    | 677            | --     | 9.47   |             |       |        |        |       |        |               |        |        |
| Batteries  | 21,129         | 21,129 | 84.51  |             |       |        |        |       |        |               |        |        |
| Hydropower | 521            | 1,164  | 4,567  |             |       |        |        |       |        |               |        |        |
| CW-STES    | 38.3           | 38.3   | 0.536  |             |       |        |        |       |        |               |        |        |
| ICE        | 57.4           | 57.4   | 0.803  |             |       |        |        |       |        |               |        |        |
| HW-STES    | 2,046          | 2,046  | 14.43  |             |       |        |        |       |        |               |        |        |
| UTES-heat  | 562            | 2,049  | 781.94 |             |       |        |        |       |        |               |        |        |
| UTES-elec. | 2,178          | --     | --     |             |       |        |        |       |        |               |        |        |

PHS=pumped hydropower storage; PCM=Phase-change materials; CSP=concentrated solar power; CW-STES=Chilled-water sensible heat thermal energy storage; ICE=ice storage; HW-STES=Hot water sensible heat thermal energy storage; and UTES=Underground thermal energy storage (either boreholes, water pits, or aquifers). The peak energy storage capacity equals the maximum discharge rate multiplied by the maximum number of hours of storage at the maximum discharge rate. Table S14 gives maximum storage times at the maximum discharge rate.

Pumped hydro storage for 2050 in a country or region is estimated as the existing (in 2020) nameplate capacity in the country or region multiplied by the ratio of existing plus pending capacity to existing capacity for the U.S. (from FERC, 2021). If a country has no existing pumped hydro, a minimum is imposed to account for the addition of pumped hydro between 2021 and 2050.

Heat captured in a working fluid by a CSP solar collector can be either used immediately to produce electricity by evaporating water and running it through a steam turbine connected to a generator, stored in a phase-change material, or both. The maximum direct CSP electricity production rate (CSP-elec) equals the maximum electricity discharge rate, which equals the nameplate capacity of the generator. The maximum charge rate of CSP phase-change material storage (CSP-PCM) is set to 1.612 multiplied by the maximum electricity discharge rate, which allows more energy to be collected than discharged directly as electricity. Thus, since the high-temperature working fluid in the CSP plant can be used to produce electricity and charge storage at the same time, the maximum overall electricity production plus storage charge rate of energy is 2.612 multiplied by the maximum discharge rate. This ratio is also the ratio of the mirror size with storage versus without storage. This ratio can be up to 3.2 in existing CSP plants (footnote to Table S17). The maximum energy storage capacity equals the maximum electricity discharge rate multiplied by the maximum number of hours of storage at full discharge, set to 22.6 hours, or 1.612 multiplied by the 14 hours required for CSP storage to charge when charging at its maximum rate.

Hydropower's maximum discharge rate in 2050 is its 2020 nameplate capacity. Hydropower can be recharged only naturally by rainfall and runoff, and its annual-average recharge rate approximately equals its 2020 annual energy output (TWh/yr) divided by the number of hours per year. Hydro is recharged each time step at this recharge rate. The maximum hydropower energy storage capacity available in all reservoirs is also assumed to equal hydro's 2020 annual energy output. Whereas the present table gives hydro's maximum storage capacity, its output from storage during a given time step is limited by the smallest among three factors: the current energy available in the reservoir, the peak hydro discharge rate multiplied by the time step, and the energy needed during the time step to keep the grid stable.

The CW-STES peak discharge rate is set equal to 40% of the annual average cold load (for air conditioning and refrigeration) subject to storage, which is given in Table S6 for each region. The ICE storage discharge rate is set to 60% of the same annual average cold load subject to storage. The peak charge rate is set equal to the peak discharge



rate. The exception is Hawaii, where it is 10% of the discharge rate. Heat pumps are used to produce both cold water and ice. Table S18 (footnotes) provides the cost of the heat pumps per kW-electricity consumed to charge storage. The HW-STES peak discharge rate is set equal to the maximum instantaneous heat load subject to storage during any 30-second period of the two-year simulation. The values have been converted to electricity assuming the heat needed for storage is produced by heat pumps (with a coefficient of performance of 4) running on electricity. Table S18 (footnotes) provides the cost of the heat pumps per kW-electricity consumed to charge storage. Because peak discharge rates are based on maximum rather than the annual average loads, they are higher than the annual-average low-temperature heat loads subject to storage in Table S6. The peak charge rate is set equal to the peak discharge rate. The exception is Hawaii, where it is 10% of the discharge rate.

UTES heat stored in underground soil (borehole storage) or water (water pit or aquifer storage) can be charged with either solar or geothermal heat or excess electricity (assuming the electricity produces heat with an electric heat pump at a coefficient of performance of 4). The maximum charge rate of heat (converted to equivalent electricity) to UTES storage (UTES-heat) is set to the nameplate capacity of solar thermal collectors divided by the coefficient of performance of a heat pump=4). When no solar thermal collectors are used, such as in all simulations here, the maximum charge rate for UTES-heat is zero, and UTES is charged only with excess grid electricity running heat pumps. The maximum charge rate of UTES storage using excess grid electricity (UTES-elec.) is set equal to the maximum instantaneous heat load subject to storage during any 30-second period of the two-year simulation. The exception is Hawaii, where it is set to 10% of this value. The maximum UTES heat discharge rate is set equal to the maximum instantaneous heat load subject to storage. The maximum charge rate, discharge rate, and capacity of UTES storage are all in units of equivalent electricity that would give heat at a coefficient of performance of 4. Table S18 (footnotes) provides the cost of the heat pumps per kW-electricity consumed to charge storage with electricity.

**Table S14.** Maximum number of days of storage at the maximum discharge rate (given in Table S13 for each region) of (a) underground thermal energy storage (UTES), (b) hot water thermal energy storage (HW-STES), and (c) hydrogen storage (H<sub>2</sub>). (d) Battery full cycles per year; (e) the maximum discharge rate during any time interval of the simulation; and (f) the number of hours of battery storage actually needed for the simulation, which equals the ratio of the storage capacity of batteries (TWh) from Table S13 divided by the maximum discharge rate during any time interval of the simulation (TW) from Column (e). The maximum discharge rate actually occurring is always less than or equal to the maximum discharge rate allowed in Table S13. (g) additional HVDC line length needed in each region; (h) additional HVDC line capacity needed in each region; (i) fraction of non-roof PV and non-shed energy that is subject to HVDC transmission in each region; (j) the maximum number of hours that flexible loads could be shifted forward in time due to demand response, during sensitivity tests, that gave the exact same result as when the baseline case maximum of eight hours was used; and (k) the fraction of building heating and cooling load that was subject to district heating and cooling in the baseline case.

| Region          | (a)<br>UTES<br>(days) | (b)<br>HW-<br>STES<br>(hours) | (c)<br>H <sub>2</sub><br>(days) | (d)<br>Battery<br>full<br>cycles<br>per year | (e)<br>Max<br>battery<br>discharge<br>rate<br>occurring<br>during<br>simulation<br>(TW) | (f)<br>Ratio of<br>max<br>storage<br>capacity<br>(TWh) to<br>max<br>battery<br>discharge<br>rate<br>(TW)<br>during<br>simu-<br>lation<br>(hours) | (g)<br>HVDC<br>line<br>length<br>(km) | (h)<br>HVDC<br>line<br>capacity<br>(MW) | (i)<br>Frac-<br>tio<br>n of<br>non-<br>roof<br>PV/non-<br>shed<br>energy<br>subject<br>to<br>HVDC | (j)<br>Max<br>hours of<br>demand<br>response<br>needed | (k)<br>Fraction<br>of<br>building<br>heating/<br>cooling<br>subject<br>to<br>district<br>heating/<br>cooling |
|-----------------|-----------------------|-------------------------------|---------------------------------|----------------------------------------------|-----------------------------------------------------------------------------------------|--------------------------------------------------------------------------------------------------------------------------------------------------|---------------------------------------|-----------------------------------------|---------------------------------------------------------------------------------------------------|--------------------------------------------------------|--------------------------------------------------------------------------------------------------------------|
| Africa          | 30                    | 8                             | 9                               | 173                                          | 0.343                                                                                   | 8.7                                                                                                                                              | 3,053                                 | 194,625                                 | 0.3                                                                                               | 4                                                      | 0.1                                                                                                          |
| Australia       | 4                     | 8                             | 10                              | 168                                          | 0.082                                                                                   | 12.3                                                                                                                                             | 2,857                                 | 47,580                                  | 0.3                                                                                               | 4                                                      | 0.1                                                                                                          |
| Canada          | 10                    | 14                            | 0                               | 71                                           | 0.074                                                                                   | 5.4                                                                                                                                              | 3,367                                 | 96,717                                  | 0.3                                                                                               | 4                                                      | 0.2                                                                                                          |
| Central America | 1                     | 8                             | 10                              | 17                                           | 0.133                                                                                   | 33.2                                                                                                                                             | 2,261                                 | 57,718                                  | 0.2                                                                                               | 6                                                      | 0.1                                                                                                          |
| Central Asia    | 20                    | 8                             | 10                              | 33                                           | 0.126                                                                                   | 23.1                                                                                                                                             | 2,602                                 | 74,389                                  | 0.3                                                                                               | 8                                                      | 0.01                                                                                                         |
| China           | 27                    | 5                             | 5                               | 245                                          | 1.559                                                                                   | 6.7                                                                                                                                              | 3,068                                 | 1,284,749                               | 0.3                                                                                               | 6                                                      | 0.3                                                                                                          |
| Cuba            | 50                    | 8                             | 65                              | 30                                           | 0.01                                                                                    | 39.0                                                                                                                                             | 0                                     | 0                                       | 0                                                                                                 | 2                                                      | 0.2                                                                                                          |
| Europe          | 10                    | 6                             | 50                              | 86                                           | 0.638                                                                                   | 7.5                                                                                                                                              | 3,006                                 | 538,500                                 | 0.3                                                                                               | 2                                                      | 0.5                                                                                                          |
| Haiti           | 1                     | 0                             | 10                              | 126                                          | 0.008                                                                                   | 12.6                                                                                                                                             | 0                                     | 0                                       | 0                                                                                                 | 2                                                      | 0.05                                                                                                         |
| Iceland         | 0                     | 8                             | 1                               | --                                           | --                                                                                      | 0.0                                                                                                                                              | 0                                     | 0                                       | 0                                                                                                 | 0                                                      | 0.92                                                                                                         |
| India           | 9                     | 8                             | 6                               | 113                                          | 0.936                                                                                   | 19.7                                                                                                                                             | 3,099                                 | 460,456                                 | 0.3                                                                                               | 0                                                      | 0.1                                                                                                          |
| Israel          | 15                    | 8                             | 25                              | 38                                           | 0.016                                                                                   | 49.2                                                                                                                                             | 0                                     | 0                                       | 0                                                                                                 | 0                                                      | 0.2                                                                                                          |
| Jamaica         | 3                     | 8                             | 15                              | 157                                          | 0.003                                                                                   | 9.5                                                                                                                                              | 0                                     | 0                                       | 0                                                                                                 | 4                                                      | 0                                                                                                            |
| Japan           | 5                     | 8                             | 5                               | 66                                           | 0.133                                                                                   | 14.4                                                                                                                                             | 2,813                                 | 74,625                                  | 0.2                                                                                               | 0                                                      | 0.1                                                                                                          |
| Mauritius       | 25                    | 8                             | 35                              | 118                                          | 0.002                                                                                   | 5.0                                                                                                                                              | 0                                     | 0                                       | 0                                                                                                 | 0                                                      | 0.2                                                                                                          |
| Mideast         | 10                    | 8                             | 7                               | 74                                           | 0.513                                                                                   | 17.9                                                                                                                                             | 2,587                                 | 374,443                                 | 0.3                                                                                               | 4                                                      | 0.05                                                                                                         |
| New Zealand     | 10                    | 8                             | 10                              | 16                                           | 0.018                                                                                   | 28.2                                                                                                                                             | 2,923                                 | 4,833                                   | 0.15                                                                                              | 8                                                      | 0.05                                                                                                         |
| Philippines     | 15                    | 8                             | 10                              | 87                                           | 0.055                                                                                   | 13.7                                                                                                                                             | 2,482                                 | 12,665                                  | 0.2                                                                                               | 4                                                      | 0.2                                                                                                          |
| Russia          | 5                     | 10                            | 5                               | 90                                           | 0.015                                                                                   | 4.0                                                                                                                                              | 2,875                                 | 158,405                                 | 0.3                                                                                               | 2                                                      | 0.5                                                                                                          |
| South America   | 30                    | 8                             | 90                              | 290                                          | 0.01                                                                                    | 4.0                                                                                                                                              | 3,496                                 | 253,404                                 | 0.3                                                                                               | 4                                                      | 0.1                                                                                                          |
| Southeast Asia  | 5                     | 8                             | 5                               | 182                                          | 0.431                                                                                   | 8.8                                                                                                                                              | 2,337                                 | 262,489                                 | 0.3                                                                                               | 4                                                      | 0.1                                                                                                          |
| South Korea     | 10                    | 8                             | 18                              | 24                                           | 0.151                                                                                   | 36.8                                                                                                                                             | 0                                     | 0                                       | 0                                                                                                 | 2                                                      | 0.15                                                                                                         |
| Taiwan          | 10                    | 8                             | 40                              | 20                                           | 0.084                                                                                   | 62.1                                                                                                                                             | 0                                     | 0                                       | 0                                                                                                 | 4                                                      | 0.15                                                                                                         |
| United States   | 10                    | 8                             | 20                              | 65                                           | 0.701                                                                                   | 15.4                                                                                                                                             | 2,712                                 | 579,931                                 | 0.3                                                                                               | 2                                                      | 0.2                                                                                                          |

For all regions, the maximum number of hours of CSP storage at the maximum discharge rate is 22.6 h; those for PHS, cold water storage (CW-STES), and ICE storage are 14 h; and that for battery storage is 4 h. The maximum number of hours of storage multiplied by the maximum discharge rate in Table S13 equals the maximum storage capacity in Table S13.

No battery-related values are shown for Iceland since Iceland requires no battery storage (Table S13).

The product of Columns (g), (h) and \$400/MW-km (Jacobson et al., 2017) gives the capital cost of HVDC transmission.

**Table S15.** Budget of simulation-averaged end-use power demand met, energy lost, WWS energy supplied, and changes in storage, during the three-year (26,291.4875 hour) simulations for each region and summed for all regions. All units are GW averaged over the simulation and are derived from the data in Table S16 by dividing values from the table in units of TWh per simulation by the number of hours of simulation. Figure S2 shows the time series of matching demand with supply and changes in storage for each region. TD&M losses are transmission, distribution, and maintenance losses. Wind turbine array losses are already accounted for in the “WWS supply before losses” numbers,” since wind supply values come from GATOR-GCMOM, which accounts for such losses.

| Region             | (a)<br>Annual<br>average<br>end-use<br>load<br>(GW) | (b)<br>TD&M<br>losses<br>(GW) | (c)<br>Storage<br>losses<br>(GW) | (d)<br>Shedding<br>losses<br>(GW) | (e)<br>End-<br>use<br>load+<br>losses<br>=a+b+<br>c+d<br>(GW) | (f)<br>WWS<br>supply<br>before<br>losses<br>(GW) | (g)<br>Changes<br>in<br>storage<br>(GW) | (h)<br>Supply<br>+chang<br>es in<br>storage<br>=f+g<br>(GW) |
|--------------------|-----------------------------------------------------|-------------------------------|----------------------------------|-----------------------------------|---------------------------------------------------------------|--------------------------------------------------|-----------------------------------------|-------------------------------------------------------------|
| Africa             | 488.48                                              | 33.75                         | 19.16                            | 71.0                              | <b>612.4</b>                                                  | 611.2                                            | 1.18                                    | <b>612.4</b>                                                |
| Australia          | 92.26                                               | 8.00                          | 2.74                             | 20.3                              | <b>123.3</b>                                                  | 123.3                                            | -0.01                                   | <b>123.3</b>                                                |
| Canada             | 167.97                                              | 13.04                         | 2.35                             | 7.4                               | <b>190.7</b>                                                  | 190.5                                            | 0.19                                    | <b>190.7</b>                                                |
| Central America    | 160.68                                              | 18.31                         | 2.06                             | 90.4                              | <b>271.5</b>                                                  | 271.5                                            | -0.04                                   | <b>271.5</b>                                                |
| Central Asia       | 166.96                                              | 15.02                         | 4.02                             | 59.2                              | <b>245.2</b>                                                  | 245.1                                            | 0.08                                    | <b>245.2</b>                                                |
| China              | 2,358.8                                             | 194.57                        | 91.50                            | 300.5                             | <b>2,945.3</b>                                                | 2,936.7                                          | 8.59                                    | <b>2,945.3</b>                                              |
| Cuba               | 9.00                                                | 1.00                          | 0.37                             | 5.6                               | <b>16.0</b>                                                   | 16.0                                             | -0.01                                   | <b>16.0</b>                                                 |
| Europe             | 948.74                                              | 81.66                         | 33.90                            | 140.8                             | <b>1,205.1</b>                                                | 1,205.8                                          | -0.66                                   | <b>1,205.1</b>                                              |
| Haiti              | 7.80                                                | 0.66                          | 0.41                             | 1.9                               | <b>10.8</b>                                                   | 10.8                                             | 0.00                                    | <b>10.8</b>                                                 |
| Iceland            | 3.19                                                | 0.32                          | 0.00002                          | 0.77                              | <b>4.28</b>                                                   | 4.28                                             | -0.00006                                | <b>4.28</b>                                                 |
| India              | 982.40                                              | 73.66                         | 40.79                            | 115.9                             | <b>1,212.8</b>                                                | 1,210.9                                          | 1.83                                    | <b>1,212.8</b>                                              |
| Israel             | 13.14                                               | 1.58                          | 0.64                             | 8.91                              | <b>24.26</b>                                                  | 24.20                                            | 0.06                                    | <b>24.26</b>                                                |
| Jamaica            | 2.60                                                | 0.19                          | 0.06                             | 0.7                               | <b>3.5</b>                                                    | 3.5                                              | 0.00                                    | <b>3.5</b>                                                  |
| Japan              | 174.54                                              | 17.37                         | 3.57                             | 41.5                              | <b>237.0</b>                                                  | 237.0                                            | 0.00                                    | <b>237.0</b>                                                |
| Mauritius          | 1.99                                                | 0.18                          | 0.05                             | 0.3                               | <b>2.5</b>                                                    | 2.5                                              | 0.01                                    | <b>2.5</b>                                                  |
| Mideast            | 708.08                                              | 69.19                         | 17.89                            | 250.6                             | <b>1,045.8</b>                                                | 1,045.5                                          | 0.25                                    | <b>1,045.8</b>                                              |
| New Zealand        | 16.98                                               | 1.54                          | 0.16                             | 3.5                               | <b>22.2</b>                                                   | 22.2                                             | 0.00                                    | <b>22.2</b>                                                 |
| Philippines        | 41.79                                               | 3.94                          | 2.00                             | 16.8                              | <b>64.5</b>                                                   | 64.3                                             | 0.19                                    | <b>64.5</b>                                                 |
| Russia             | 254.66                                              | 24.03                         | 9.65                             | 50.0                              | <b>338.4</b>                                                  | 338.3                                            | 0.03                                    | <b>338.4</b>                                                |
| South America      | 467.93                                              | 33.94                         | 6.05                             | 6.1                               | <b>514.1</b>                                                  | 511.2                                            | 2.83                                    | <b>514.1</b>                                                |
| Southeast Asia     | 591.67                                              | 59.64                         | 14.69                            | 300.9                             | <b>966.9</b>                                                  | 966.9                                            | -0.07                                   | <b>966.9</b>                                                |
| South Korea        | 151.25                                              | 16.00                         | 3.70                             | 75.4                              | <b>246.4</b>                                                  | 246.4                                            | -0.03                                   | <b>246.4</b>                                                |
| Taiwan             | 90.70                                               | 7.24                          | 2.69                             | 9.7                               | <b>110.4</b>                                                  | 110.4                                            | -0.03                                   | <b>110.4</b>                                                |
| United States      | 978.96                                              | 96.31                         | 20.98                            | 282.4                             | <b>1,378.7</b>                                                | 1,379.0                                          | -0.32                                   | <b>1,378.7</b>                                              |
| <b>All regions</b> | <b>8,880.5</b>                                      | <b>771.2</b>                  | <b>279.4</b>                     | <b>1,861.4</b>                    | <b>11,793</b>                                                 | <b>11,778.4</b>                                  | <b>14.1</b>                             | <b>11,793</b>                                               |

**Table S16.** Budget of total end-use energy demand met, energy lost, WWS energy supplied, and changes in storage, during the three-year (26,291.4875 hour) simulation for each region and summed over all regions. All units are TWh over the simulation. Divide by the number of hours of simulation to obtain simulation-averaged power values, which are provided in Table S15 for key parameters. Figure S2 shows the time series of matching demand with supply and changes in storage for each region.

|                                                                    | <b>Africa</b>  | <b>Australia</b> | <b>Canada</b>   | <b>Central America</b> | <b>Central Asia</b> |
|--------------------------------------------------------------------|----------------|------------------|-----------------|------------------------|---------------------|
| <b>A1. Total end use demand</b>                                    | <b>12,843</b>  | <b>2,426</b>     | <b>4,416</b>    | <b>4,224</b>           | <b>4,390</b>        |
| Electricity for electricity inflexible demand                      | 6,276          | 1,269            | 2,305           | 1,938                  | 2,337               |
| Electricity for electricity, heat, cold storage + DR               | 5,379          | 947              | 1,824           | 1,816                  | 1,797               |
| Electricity for H <sub>2</sub> direct use + H <sub>2</sub> storage | 1,188          | 209              | 287             | 470                    | 256                 |
| <b>A2. Total end use demand</b>                                    | <b>12,843</b>  | <b>2,426</b>     | <b>4,416</b>    | <b>4,224</b>           | <b>4,390</b>        |
| Electricity for direct use, electricity storage, + H <sub>2</sub>  | 11,976         | 2,372            | 4,241           | 4,070                  | 4,201               |
| Low-T heat load met by heat storage                                | 806            | 52               | 174             | 140                    | 188                 |
| Cold load met by cold storage                                      | 61.26          | 2.42             | 0.91            | 14.45                  | 1.14                |
| <b>A3. Total end use demand</b>                                    | <b>12,843</b>  | <b>2,426</b>     | <b>4,416</b>    | <b>4,224</b>           | <b>4,390</b>        |
| Electricity for direct use, electricity storage, DR                | 10,601         | 2,127            | 3,860           | 3,570                  | 3,929               |
| Electricity for H <sub>2</sub> direct use + H <sub>2</sub> storage | 1,188          | 209              | 287             | 470                    | 256                 |
| Electricity + heat for heat subject to storage                     | 806            | 76               | 254             | 140                    | 200                 |
| Electricity for cold load subject to storage                       | 248.01         | 13.66            | 15.54           | 43.94                  | 4.31                |
| <b>B. Total losses</b>                                             | <b>3,257</b>   | <b>817</b>       | <b>599</b>      | <b>2,913</b>           | <b>2,058</b>        |
| Transmission, distribution, downtime losses                        | 887            | 210              | 343             | 481                    | 395                 |
| Losses CSP storage                                                 | 3.67           | 1                | 0.00            | 0.40                   | 0.74                |
| Losses PHS storage                                                 | 0.23           | 0.0497           | 1.2163          | 0.0198                 | 0.0425              |
| Losses battery storage                                             | 173            | 55.9             | 9.42            | 24.2                   | 32.6                |
| Losses CW-STES + ICE storage                                       | 11             | 0.4              | 0.16            | 2.6                    | 0.2                 |
| Losses HW-STES storage                                             | 106            | 5.5              | 23              | 26.9                   | 26.1                |
| Losses UTES storage                                                | 210            | 9.4              | 28              | 0.0                    | 46.1                |
| Losses from shedding                                               | 1,866          | 534              | 194             | 2,378                  | 1,557               |
| <b>Net end-use demand plus losses (A1 + B)</b>                     | <b>16,100</b>  | <b>3,242</b>     | <b>5,015</b>    | <b>7,137</b>           | <b>6,447</b>        |
| <b>C. Total WWS supply before T&amp;D losses</b>                   | <b>16,069</b>  | <b>3,243</b>     | <b>5,010</b>    | <b>7,138</b>           | <b>6,445</b>        |
| Onshore + offshore wind electricity                                | 6,603          | 928              | 2,849           | 4,073                  | 3,019               |
| Rooftop + utility PV+ CSP electricity                              | 8,995          | 2,184            | 745             | 2,578                  | 3,138               |
| Hydropower electricity                                             | 362.3          | 93.5             | 1,254.8         | 229.3                  | 282.5               |
| Wave electricity                                                   | 16.56          | 5.02             | 7.24            | 8.18                   | 5.32                |
| Geothermal electricity                                             | 76.7854        | 9.5047           | 113.2666        | 236.2056               | 0                   |
| Tidal electricity                                                  | 4.9087         | 3.2488           | 12.387          | 2.035                  | 0.117               |
| Solar heat                                                         | 7.7406         | 18.4275          | 1.6265          | 9.5528                 | 0                   |
| Geothermal heat                                                    | 2.7599         | 1.3416           | 26.0254         | 2.3516                 | 0.0416              |
| <b>D. Net taken from (+) or added to (-) storage</b>               | <b>31.0671</b> | <b>-0.3516</b>   | <b>5.0783</b>   | <b>-0.9874</b>         | <b>2.1793</b>       |
| CSP storage                                                        | 0.1344         | 0.0164           | 0               | -0.0187                | -0.011              |
| PHS storage                                                        | -0.0389        | -0.0374          | 0.1745          | -0.0084                | -0.042              |
| Battery storage                                                    | 0.7392         | -0.0302          | 0.3             | -0.44                  | -0.73               |
| CW-STES+ICE storage                                                | 0.1189         | 0.0055           | -0.0004         | -0.0023                | -0.0006             |
| HW-STES storage                                                    | 1.0362         | -0.0183          | 0.2538          | -0.0221                | 0.162               |
| UTES storage                                                       | 26.4577        | -0.22            | 4.3505          | -0.0664                | 2.9158              |
| H <sub>2</sub> storage                                             | 2.6197         | -0.0676          | 0               | -0.4295                | -0.115              |
| <b>Energy supplied plus taken from storage (C+D)</b>               | <b>16,100</b>  | <b>3,242</b>     | <b>5,015</b>    | <b>7,137</b>           | <b>6,447</b>        |
|                                                                    | <b>China</b>   | <b>Cuba</b>      | <b>Europe</b>   | <b>Haiti</b>           | <b>Iceland</b>      |
| <b>A1. Total end use demand</b>                                    | <b>62,015</b>  | <b>237</b>       | <b>24,943.8</b> | <b>205</b>             | <b>84</b>           |
| Electricity for electricity inflexible demand                      | 29,043         | 119              | 11,251.2        | 100                    | 31                  |

|                                                                    |                |                |                 |                |                |
|--------------------------------------------------------------------|----------------|----------------|-----------------|----------------|----------------|
| Electricity for electricity, heat, cold storage + DR               | 30,760         | 109            | 11,744.9        | 81             | 49             |
| Electricity for H <sub>2</sub> direct use + H <sub>2</sub> storage | 2,212          | 8              | 1,947.6         | 24             | 4              |
| <b>A2. Total end use demand</b>                                    | <b>62,015</b>  | <b>237</b>     | <b>24,943.8</b> | <b>205</b>     | <b>84</b>      |
| Electricity for direct use, electricity storage, + H <sub>2</sub>  | 57,685         | 224            | 21,544.4        | 196            | 69             |
| Low-T heat load met by heat storage                                | 4,232          | 10             | 3,369.0         | 8              | 15             |
| Cold load met by cold storage                                      | 98.03          | 2.18           | 30.41           | 0.59           | 0.00           |
| <b>A3. Total end use demand</b>                                    | <b>62,015</b>  | <b>237</b>     | <b>24,943.8</b> | <b>205</b>     | <b>84</b>      |
| Electricity for direct use, electricity storage, DR                | 54,571         | 212            | 19,332.3        | 171            | 66             |
| Electricity for H <sub>2</sub> direct use + H <sub>2</sub> storage | 2,212          | 8              | 1,947.6         | 24             | 4              |
| Electricity + heat for heat subject to storage                     | 4,489          | 11             | 3,372.3         | 8              | 15             |
| Electricity for cold load subject to storage                       | 743.00         | 6.67           | 291.53          | 2.14           | 0.00           |
| <b>B. Total losses</b>                                             | <b>15,422</b>  | <b>183</b>     | <b>6,741</b>    | <b>79</b>      | <b>29</b>      |
| Transmission, distribution, downtime losses                        | 5,115          | 26             | 2,146.95        | 17             | 8              |
| Losses CSP storage                                                 | 17.31          | 0.03           | 0.7431          | 0.05           | 0.00           |
| Losses PHS storage                                                 | 11.4020        | 0.0038         | 5               | 0.0010         | 0.0000         |
| Losses battery storage                                             | 846            | 4.02           | 137             | 4.2            | 0.00           |
| Losses CW-STES + ICE storage                                       | 18             | 0.39           | 5               | 0.1            | 0.00           |
| Losses HW-STES storage                                             | 328            | 1.06           | 536             | 0.0            | 0.00           |
| Losses UTES storage                                                | 1,185          | 4.16           | 206             | 6.3            | 0.00           |
| Losses from shedding                                               | 7,900          | 147            | 3,702.3         | 50.6           | 20.2           |
| <b>Net end-use demand plus losses (A1 + B)</b>                     | <b>77,437</b>  | <b>420</b>     | <b>31,684.4</b> | <b>283.7</b>   | <b>112.5</b>   |
| <b>C. Total WWS supply before T&amp;D losses</b>                   | <b>77,211</b>  | <b>420</b>     | <b>31,701.7</b> | <b>284</b>     | <b>113</b>     |
| Onshore + offshore wind electricity                                | 33,184         | 234            | 19,787.5        | 76             | 23             |
| Rooftop + utility PV+ CSP electricity                              | 37,971         | 184            | 9,191.6         | 184            | 0              |
| Hydropower electricity                                             | 4,416.8        | 0.8            | 2,044.0         | 8.1            | 33.5           |
| Wave electricity                                                   | 31.78          | 0.51           | 25.74           | 0.00           | 0.08           |
| Geothermal electricity                                             | 43.8315        | 0              | 72.13           | 15.6697        | 21.6528        |
| Tidal electricity                                                  | 13.879         | 0.287          | 34.779          | 0.298          | 0.253          |
| Solar heat                                                         | 971.8804       | 0              | 96.332          | 0              | 0              |
| Geothermal heat                                                    | 577.4566       | 0              | 449.6054        | 0              | 33.7242        |
| <b>D. Net taken from (+) or added to (-) storage</b>               | <b>225.909</b> | <b>-0.2931</b> | <b>-17.3316</b> | <b>-0.0431</b> | <b>-0.0015</b> |
| CSP storage                                                        | 1.4127         | -0.0011        | -0.0365         | -0.0009        | 0              |
| PHS storage                                                        | -0.1767        | -0.0042        | -0.2913         | -0.0028        | 0              |
| Battery storage                                                    | 5.4043         | -0.04          | -0.48           | -0.01          | 0              |
| CW-STES+ICE storage                                                | -0.0263        | -0.0004        | -0.0155         | -0.0001        | -0.0003        |
| HW-STES storage                                                    | 2.4927         | -0.0013        | -0.1858         | 0              | -0.0042        |
| UTES storage                                                       | 216.5664       | -0.2004        | -7.4332         | -0.0091        | 0              |
| H <sub>2</sub> storage                                             | 0.2359         | -0.0458        | -8.8893         | -0.0202        | 0.003          |
| <b>Energy supplied plus taken from storage (C+D)</b>               | <b>77,437</b>  | <b>420</b>     | <b>31,684.4</b> | <b>283.7</b>   | <b>112.5</b>   |

|                                                                    | <b>India</b>  | <b>Israel</b> | <b>Jamaica</b> | <b>Japan</b> | <b>Mauritius</b> |
|--------------------------------------------------------------------|---------------|---------------|----------------|--------------|------------------|
| <b>A1. Total end use demand</b>                                    | <b>25,829</b> | <b>346</b>    | <b>68</b>      | <b>4,589</b> | <b>52</b>        |
| Electricity for electricity inflexible demand                      | 12,361        | 184           | 29             | 2,520        | 19               |
| Electricity for electricity, heat, cold storage + DR               | 11,986        | 129           | 30             | 1,774        | 22               |
| Electricity for H <sub>2</sub> direct use + H <sub>2</sub> storage | 1,482         | 32            | 9              | 295          | 12               |
| <b>A2. Total end use demand</b>                                    | <b>25,829</b> | <b>346</b>    | <b>68</b>      | <b>4,589</b> | <b>52</b>        |
| Electricity for direct use, electricity storage, + H <sub>2</sub>  | 24,830        | 326           | 67             | 4,412        | 50               |
| Low-T heat load met by heat storage                                | 952           | 18            | 1              | 175          | 2                |
| Cold load met by cold storage                                      | 46.66         | 1.36          | 0.00           | 1.44         | 0.59             |
| <b>A3. Total end use demand</b>                                    | <b>25,829</b> | <b>346</b>    | <b>68</b>      | <b>4,589</b> | <b>52</b>        |
| Electricity for direct use, electricity storage, DR                | 22,939        | 287           | 59             | 4,099        | 37               |
| Electricity for H <sub>2</sub> direct use + H <sub>2</sub> storage | 1,482         | 32            | 9              | 295          | 12               |

|                                                      |                |               |               |               |               |
|------------------------------------------------------|----------------|---------------|---------------|---------------|---------------|
| Electricity + heat for heat subject to storage       | 1,107          | 19            | 1             | 186           | 2             |
| Electricity for cold load subject to storage         | 301.04         | 7.17          | 0.00          | 8.77          | 1.84          |
| <b>B. Total losses</b>                               | <b>6,057</b>   | <b>292</b>    | <b>24</b>     | <b>1,643</b>  | <b>14</b>     |
| Transmission, distribution, downtime losses          | 1,937          | 41            | 5             | 457           | 5             |
| Losses CSP storage                                   | 12.88          | 0.08          | 0.02          | 0.00          | 0.00          |
| Losses PHS storage                                   | 0.0024         | 0.03          | 0.06          | 0.86          | 0.44          |
| Losses battery storage                               | 693            | 10            | 1             | 42            | 0             |
| Losses CW-STES + ICE storage                         | 8.43           | 0.25          | 0.00          | 0.26          | 0.11          |
| Losses HW-STES storage                               | 123.88         | 1             | 0             | 20            | 0             |
| Losses UTES storage                                  | 234.62         | 5             | 0             | 30            | 0             |
| Losses from shedding                                 | 3,048          | 234           | 17            | 1,092         | 8             |
| <b>Net end-use demand plus losses (A1 + B)</b>       | <b>31,886</b>  | <b>638</b>    | <b>92</b>     | <b>6,232</b>  | <b>66</b>     |
| <b>C. Total WWS supply before T&amp;D losses</b>     | <b>31,837</b>  | <b>636</b>    | <b>92</b>     | <b>6,232</b>  | <b>66</b>     |
| Onshore + offshore wind electricity                  | 8,943          | 93            | 37            | 3,351         | 42            |
| Rooftop + utility PV+ CSP electricity                | 22,254         | 530           | 55            | 2,497         | 23            |
| Hydropower electricity                               | 578.9          | 0             | 0             | 282           | 1             |
| Wave electricity                                     | 17.26          | 0             | 0             | 9             | 0             |
| Geothermal electricity                               | 6.31           | 0             | 0             | 34.8924       | 0             |
| Tidal electricity                                    | 5.36           | 0.057         | 0.111         | 14.374        | 0.043         |
| Solar heat                                           | 27             | 11.5871       | 0             | 6.5945        | 0.2775        |
| Geothermal heat                                      | 5              | 1.171         | 0             | 36.5304       | 0             |
| <b>D. Net taken from (+) or added to (-) storage</b> | <b>48.0023</b> | <b>1.5982</b> | <b>0.0145</b> | <b>0.0444</b> | <b>0.3312</b> |
| CSP storage                                          | 0.9354         | 0.0131        | -0.0004       | 0             | 0.0003        |
| PHS storage                                          | -0.0201        | -0.0155       | -0.0042       | -0.2474       | -0.0497       |
| Battery storage                                      | 3.7855         | 0.2387        | -0.0024       | 0.2058        | 0.009         |
| CW-STES+ICE storage                                  | 0.001          | 0.0014        | 0             | -0.0003       | 0.0009        |
| HW-STES storage                                      | 2              | 0.0213        | -0.0007       | 0.1534        | 0.0007        |
| UTES storage                                         | 40.9141        | 0.9569        | 0.0338        | -0.1103       | 0.0543        |
| H <sub>2</sub> storage                               | -0.0916        | 0.3825        | -0.0116       | 0.0433        | 0.3156        |
| <b>Energy supplied plus taken from storage (C+D)</b> | <b>31,886</b>  | <b>638</b>    | <b>92</b>     | <b>6,232</b>  | <b>66</b>     |

|                                                                    | <b>Mideast</b> | <b>New Zealand</b> | <b>Philip-pines</b> | <b>Russia</b> | <b>South America</b> |
|--------------------------------------------------------------------|----------------|--------------------|---------------------|---------------|----------------------|
| <b>A1. Total end use demand</b>                                    | <b>18,616</b>  | <b>446</b>         | <b>1,099</b>        | <b>6,695</b>  | <b>12,302</b>        |
| Electricity for electricity inflexible demand                      | 8,984          | 232                | 500                 | 2,803         | 5,889                |
| Electricity for electricity, heat, cold storage + DR               | 8,224          | 177                | 471                 | 3,525         | 5,413                |
| Electricity for H <sub>2</sub> direct use + H <sub>2</sub> storage | 1,409          | 38                 | 128                 | 368           | 1,001                |
| <b>A2. Total end use demand</b>                                    | <b>18,616</b>  | <b>446</b>         | <b>1,099</b>        | <b>6,695</b>  | <b>12,302</b>        |
| Electricity for direct use, electricity storage, + H <sub>2</sub>  | 18,021         | 436                | 1,013               | 5,622         | 11,914               |
| Low-T heat load met by heat storage                                | 578            | 11                 | 73                  | 1,055         | 343                  |
| Cold load met by cold storage                                      | 17.57          | 0.05               | 13.17               | 17.63         | 45.31                |
| <b>A3. Total end use demand</b>                                    | <b>18,616</b>  | <b>446</b>         | <b>1,099</b>        | <b>6,695</b>  | <b>12,302</b>        |
| Electricity for direct use, electricity storage, DR                | 16,543         | 398                | 853                 | 5,154         | 10,768               |
| Electricity for H <sub>2</sub> direct use + H <sub>2</sub> storage | 1,409          | 38                 | 128                 | 368           | 1,001                |
| Electricity + heat for heat subject to storage                     | 589            | 11                 | 73                  | 1,090         | 343                  |
| Electricity for cold load subject to storage                       | 75.65          | 0.28               | 44.51               | 83.65         | 191.38               |
| <b>B. Total losses</b>                                             | <b>8,879</b>   | <b>137</b>         | <b>597</b>          | <b>2,201</b>  | <b>1,213</b>         |
| Transmission, distribution, downtime losses                        | 1,819          | 40                 | 104                 | 632           | 892                  |
| Losses CSP storage                                                 | 4.47           | 0.03               | 0.20                | 0.00          | 2.37                 |
| Losses PHS storage                                                 | 0.02           | 0.02               | 0.09                | 6.20          | 25.71                |
| Losses battery storage                                             | 228            | 3                  | 22                  | 2             | 4                    |

|                                                      |               |                |               |              |                |
|------------------------------------------------------|---------------|----------------|---------------|--------------|----------------|
| Losses CW-STES + ICE storage                         | 3.17          | 0.01           | 2.38          | 3.19         | 8.18           |
| Losses HW-STES storage                               | 55            | 1              | 10            | 205          | 43             |
| Losses UTES storage                                  | 180           | 1              | 18            | 38           | 76             |
| Losses from shedding                                 | 6,589         | 92             | 441           | 1,315        | 162            |
| <b>Net end-use demand plus losses (A1 + B)</b>       | <b>27,495</b> | <b>583</b>     | <b>1,696</b>  | <b>8,896</b> | <b>13,515</b>  |
| <b>C. Total WWS supply before T&amp;D losses</b>     | <b>27,489</b> | <b>583</b>     | <b>1,691</b>  | <b>8,895</b> | <b>13,441</b>  |
| Onshore + offshore wind electricity                  | 10,928        | 311            | 315           | 6,881        | 6,331          |
| Rooftop + utility PV+ CSP electricity                | 15,859        | 150            | 1,197         | 1,333        | 4,092          |
| Hydropower electricity                               | 552           | 66             | 44            | 647          | 2,825          |
| Wave electricity                                     | 2             | 1              | 2             | 13           | 19             |
| Geothermal electricity                               | 36.558        | 46.5203        | 129.3001      | 11.3466      | 124.2522       |
| Tidal electricity                                    | 1.737         | 1.271          | 3.084         | 2.234        | 7.538          |
| Solar heat                                           | 56.4519       | 0.2852         | 0             | 0.0448       | 33.6144        |
| Geothermal heat                                      | 53.6542       | 7.3616         | 0.0237        | 7.1371       | 8.8217         |
| <b>D. Net taken from (+) or added to (-) storage</b> | <b>6.5028</b> | <b>-0.0176</b> | <b>5.0874</b> | <b>0.762</b> | <b>74.3895</b> |
| CSP storage                                          | 0.5889        | -0.0013        | 0.022         | 0            | 0.3912         |
| PHS storage                                          | -0.0203       | -0.0084        | -0.0157       | -0.073       | 0.2459         |
| Battery storage                                      | 0.4223        | -0.0104        | 0.1757        | -0.015       | 0.036          |
| CW-STES+ICE storage                                  | -0.0029       | 0.0001         | 0.0215        | -0.0111      | 0.0917         |
| HW-STES storage                                      | 0.5213        | -0.0007        | 0.2014        | -0.248       | 0.0764         |
| UTES storage                                         | 5.3121        | -0.0257        | 4.7206        | -0.4006      | -0.4364        |
| H <sub>2</sub> storage                               | -0.3186       | 0.0288         | -0.0381       | 1.5097       | 73.9847        |
| <b>Energy supplied plus taken from storage (C+D)</b> | <b>27,495</b> | <b>583</b>     | <b>1,696</b>  | <b>8,896</b> | <b>13,515</b>  |

|                                                                    | <b>Southeast Asia</b> | <b>South Korea</b> | <b>Taiwan</b> | <b>United States</b> | <b>All regions</b> |
|--------------------------------------------------------------------|-----------------------|--------------------|---------------|----------------------|--------------------|
| <b>A1. Total end use demand</b>                                    | <b>15,556</b>         | <b>3,976</b>       | <b>2,385</b>  | <b>25,738</b>        | <b>233,482</b>     |
| Electricity for electricity inflexible demand                      | 6,853                 | 2,104              | 1,151         | 12,863               | 111,161            |
| Electricity for electricity, heat, cold storage + DR               | 6,948                 | 1,628              | 1,082         | 10,485               | 106,399            |
| Electricity for H <sub>2</sub> direct use + H <sub>2</sub> storage | 1,755                 | 245                | 152           | 2,390                | 15,921             |
| <b>A2. Total end use demand</b>                                    | <b>15,556</b>         | <b>3,976</b>       | <b>2,385</b>  | <b>25,738</b>        | <b>233,482</b>     |
| Electricity for direct use, electricity storage, + H <sub>2</sub>  | 14,966                | 3,797              | 2,274         | 24,307               | 218,616            |
| Low-T heat load met by heat storage                                | 508                   | 178                | 110           | 1,402                | 14,397             |
| Cold load met by cold storage                                      | 81.74                 | 1.67               | 1.26          | 29.15                | 469                |
| <b>A3. Total end use demand</b>                                    | <b>15,556</b>         | <b>3,976</b>       | <b>2,385</b>  | <b>25,738</b>        | <b>233,482</b>     |
| Electricity for direct use, electricity storage, DR                | 13,081                | 3,544              | 2,107         | 21,753               | 200,059            |
| Electricity for H <sub>2</sub> direct use + H <sub>2</sub> storage | 1,755                 | 245                | 152           | 2,390                | 15,921             |
| Electricity + heat for heat subject to storage                     | 508                   | 178                | 110           | 1,402                | 14,988             |
| Electricity for cold load subject to storage                       | 212.29                | 9.35               | 15.18         | 193.36               | 2,513              |
| <b>B. Total losses</b>                                             | <b>9,864</b>          | <b>2,501</b>       | <b>517</b>    | <b>10,509</b>        | <b>76,544</b>      |
| Transmission, distribution, downtime losses                        | 1,568                 | 421                | 190           | 2,532                | 20,274             |
| Losses CSP storage                                                 | 3.11                  | 0.70               | 0.00          | 2.26                 | 50                 |
| Losses PHS storage                                                 | 1.43                  | 0.32               | 0.32          | 0.08                 | 54                 |
| Losses battery storage                                             | 231                   | 45                 | 34            | 235                  | 2,835              |
| Losses CW-STES + ICE storage                                       | 14.77                 | 0.30               | 0.23          | 5.27                 | 85                 |
| Losses HW-STES storage                                             | 92                    | 25                 | 17            | 207                  | 1,852              |
| Losses UTES storage                                                | 44                    | 27                 | 19            | 102                  | 2,471              |
| Losses from shedding                                               | 7,910                 | 1,983              | 256           | 7,425                | 48,923             |
| <b>Net end-use demand plus losses (A1 + B)</b>                     | <b>25,420</b>         | <b>6,478</b>       | <b>2,901</b>  | <b>36,248</b>        | <b>310,026</b>     |
| <b>C. Total WWS supply before T&amp;D losses</b>                   | <b>25,422</b>         | <b>6,479</b>       | <b>2,902</b>  | <b>36,256</b>        | <b>309,656</b>     |
| Onshore + offshore wind electricity                                | 8,516                 | 3,399              | 977           | 18,418               | 139,318            |



|                                                      |               |                |                |                |                |
|------------------------------------------------------|---------------|----------------|----------------|----------------|----------------|
| Rooftop + utility PV+ CSP electricity                | 16,033        | 3,026          | 1,071          | 16,307         | 149,600        |
| Hydropower electricity                               | 528           | 23             | 27             | 979            | 15,278         |
| Wave electricity                                     | 21            | 0              | 3              | 53             | 241            |
| Geothermal electricity                               | 318.0787      | 0              | 819.6151       | 152.826        | 2,269          |
| Tidal electricity                                    | 3.780         | 6.608          | 0.179          | 2.243          | 121            |
| Solar heat                                           | 0.3349        | 3.3858         | 3.2135         | 49.065         | 1,298          |
| Geothermal heat                                      | 2.1889        | 21.1719        | 0.0014         | 294.3594       | 1,531          |
| <b>D. Net taken from (+) or added to (-) storage</b> | <b>-1.896</b> | <b>-0.7517</b> | <b>-0.8032</b> | <b>-8.3417</b> | <b>370</b>     |
| CSP storage                                          | -0.0326       | 0.1457         | 0              | -0.0757        | 3.4819         |
| PHS storage                                          | -0.0374       | -0.135         | -0.0344        | -0.1344        | -0.9768        |
| Battery storage                                      | -0.19         | -0.3218        | -0.1916        | -0.9169        | 7.9382         |
| CW-STES+ICE storage                                  | -0.0056       | 0              | -0.0001        | -0.01          | 0.1651         |
| HW-STES storage                                      | -0.0518       | 0.1308         | 0.1387         | 1.004          | 8.1379         |
| UTES storage                                         | -0.7774       | -0.315         | -0.245         | -4.014         | 288.0287       |
| H <sub>2</sub> storage                               | -0.8009       | -0.2563        | -0.4708        | -4.1947        | 63.3732        |
| <b>Energy supplied plus taken from storage (C+D)</b> | <b>25,420</b> | <b>6,478</b>   | <b>2,901</b>   | <b>36,248</b>  | <b>310,026</b> |

End-use demands in A1, A2, A3 should be identical. Transmission/distribution/maintenance loss rates are given in Table S17. Round-trip storage efficiencies are given in Table S18. Generated electricity is shed when it exceeds the sum of electricity demand, cold storage capacity, heat storage capacity, and H<sub>2</sub> storage capacity.

Onshore and offshore wind turbines in GATOR-GCMOM, used to calculate wind power output for use in LOADMATCH, are assumed to be Senvion (formerly Repower) 5 MW turbines with 126-m diameter blades, 100 m hub heights, a cut-in wind speed of 3.5 m/s, and a cut-out wind speed of 30 m/s.

Rooftop PV panels in GATOR-GCMOM were modeled as fixed-tilt panels at the optimal tilt angle of the country they resided in; utility PV panels were modeled as half fixed optimal tilt and half single-axis horizontal tracking. All panels were assumed to have a nameplate capacity of 390 W and a panel area of 1.629668 m<sup>2</sup>, which gives a 2050 panel efficiency (Watts of power output per Watt of solar radiation incident on the panel) of 23.9%, which is an increase from the 2015 value of 20.1%.

Each CSP plant before storage is assumed to have the mirror and land characteristics of the Ivanpah solar plant, which has 646,457 m<sup>2</sup> of mirrors and 2.17 km<sup>2</sup> of land per 100 MW nameplate capacity and a CSP efficiency (fraction of incident solar radiation that is converted to electricity) of 15.796%, calculated as the product of the reflection efficiency of 55% and the steam plant efficiency of 28.72%. The efficiency of the CSP hot fluid collection (energy in fluid divided by incident radiation) is 34%.

**Table S17.** Parameters for determining costs of energy from electricity and heat generators.

|                               | Capital cost new installations (\$million/MW) | O&M Cost (\$/kW/yr) | Decom-missioning cost (% of capital cost) | Lifetime (years) | TDM losses (% of energy generated) |
|-------------------------------|-----------------------------------------------|---------------------|-------------------------------------------|------------------|------------------------------------|
| Onshore wind                  | 1.02 (0.85-1.18)                              | 37.5 (35-40)        | 1.25 (1.2-1.3)                            | 30 (25-35)       | 7.5 (5-10)                         |
| Offshore wind                 | 1.96 (1.49-2.44)                              | 80 (60-100)         | 2 (2-2)                                   | 30 (25-35)       | 7.5 (5-10)                         |
| Residential PV                | 1.93 (1.76-1.10)                              | 27.5 (25-30)        | 0.75 (0.5-1)                              | 44 (41-47)       | 1.5 (1-2)                          |
| Commercial/government PV      | 1.29 (0.93-1.66)                              | 16.5 (13-20)        | 0.75 (0.5-1)                              | 46 (43-49)       | 1.5 (1-2)                          |
| Utility-scale PV              | 0.75 (0.67-0.84)                              | 19.5 (16.5-22.5)    | 0.75 (0.5-1)                              | 48.5 (45-52)     | 7.5 (5-10)                         |
| CSP with storage <sup>a</sup> | 4.58 (3.59-5.57)                              | 50 (40-60)          | 1.25 (1-1.5)                              | 45 (40-50)       | 7.5 (5-10)                         |
| Geothermal electricity        | 4.63 (3.97-5.29)                              | 45 (36-54)          | 2.5 (2-3)                                 | 45 (40-50)       | 7.5 (5-10)                         |
| Hydropower                    | 2.78 (2.36-3.20)                              | 15.5 (15-16)        | 2.5 (2-3)                                 | 85 (70-100)      | 7.5 (5-10)                         |
| Wave                          | 4.10 (2.82-5.39)                              | 175 (100-250)       | 2 (2-2)                                   | 45 (40-50)       | 7.5 (5-10)                         |
| Tidal                         | 3.65 (2.93-4.38)                              | 125 (50-200)        | 2.5 (2-3)                                 | 45 (40-50)       | 7.5 (5-10)                         |
| Solar thermal heat            | 1.17 (1.06-1.29)                              | 50 (40-60)          | 1.25 (1-1.5)                              | 35 (30-40)       | 3 (2-4)                            |
| Geothermal heat               | 4.63 (3.97-5.29)                              | 45 (36-54)          | 2 (1-3)                                   | 45 (40-50)       | 7.5 (5-10)                         |

Capital costs (per MW of nameplate capacity) are an average of 2020 and 2050 values. 2050 costs are derived and sourced in Jacobson and Delucchi (2021), which uses the same methodology as in Jacobson et al. (2019). For comparison the capital costs of onshore wind and utility-scale PV from Lazard (2021) for 2021 are \$1.025-1.35 million/MW and \$0.8-0.95 million/MW, respectively.

O&M=Operation and maintenance. TDM=transmission/distribution/maintenance. TDM losses are a percentage of all energy produced by the generator and are an average over short and long-distance (high-voltage direct current) lines.

Short-distance transmission costs are \$0.0105 (0.01-0.011)/kWh. Distribution costs are \$0.02375 (0.023-0.0245)/kWh.

Long-distance transmission costs are \$0.0089 (0.0042-0.010)/kWh (in USD 2020) (Jacobson et al., 2017, but brought up to USD 2020), which assumes 1,500 to 2,000 km HVDC lines, a capacity factor usage of the lines of ~50% and a capital cost of ~\$400 (300-460)/MWtr-km. Table S14 gives the total new HVDC line length and capacity needed and the fraction of all non-rooftop-PV and non-shed electricity generated that is subject to HVDC transmission by region. The discount rate used for generation, storage, transmission/distribution, and social costs is a social discount rate of 2 (1-3)%.

<sup>a</sup>The capital cost of CSP with storage includes the cost of extra mirrors and land but excludes costs of phase-change material and storage tanks, which are given in Table S18. The cost of CSP with storage depends on the ratio of the CSP storage maximum charge rate plus direct electricity use rate (which equals the maximum discharge rate) to the CSP maximum discharge rate. For this table, for the purpose of benchmarking the “CSP with storage” cost, we use a ratio of 3.2:1. (In other words, if 3.2 units of sunlight come in, a maximum of 2.2 units can go to storage and a maximum of 1 unit can be discharged directly as electricity at the same time.) The ratio for “CSP no storage” is 1:1. In our actual simulations and cost calculations, we assume a ratio of 2.612:1 for CSP with storage (footnote to Table S13) and find the cost for this assumed ratio by interpolating between the “CSP with storage” benchmark value and the “CSP no storage” value in this table.

**Table S18.** Present value of mean 2020 to 2050 lifecycle costs of new storage capacity and round-trip efficiencies of the storage technologies treated here.

| Storage technology | Present-value of lifecycle cost of new storage (\$/kWh—electricity or equivalent electricity, in the case of cold and heat storage) |     |      | Round-trip charge/store/discharge efficiency (%) |
|--------------------|-------------------------------------------------------------------------------------------------------------------------------------|-----|------|--------------------------------------------------|
|                    | Middle                                                                                                                              | Low | High |                                                  |
| <b>Electricity</b> |                                                                                                                                     |     |      |                                                  |
| PHS                | 14                                                                                                                                  | 12  | 16   | 80                                               |
| CSP-PCM            | 20                                                                                                                                  | 15  | 23   | 55, 28.72, 99                                    |
| LI Batteries       | 60                                                                                                                                  | 30  | 90   | 89.5                                             |
| <b>Cold</b>        |                                                                                                                                     |     |      |                                                  |
| CW-STES            | 12                                                                                                                                  | 0.4 | 40   | 84.7                                             |
| ICE                | 100                                                                                                                                 | 40  | 160  | 82.5                                             |
| <b>Heat</b>        |                                                                                                                                     |     |      |                                                  |
| HW-STES            | 12                                                                                                                                  | 0.4 | 40   | 83                                               |
| UTES               | 1.6                                                                                                                                 | 0.4 | 4    | 56                                               |

PHS=pumped hydropower storage; CSP-PCM=concentrated solar power with phase change material for storage; LI Batteries=lithium ion batteries; CW-STES=cold water sensible-heat thermal energy storage; ICE=ice storage; HW-STES=hot water sensible-heat thermal energy storage; UTES=underground thermal energy storage (modeled as borehole).

All values reflect averages between 2020 and 2050. From Jacobson et al. (2019), except as follows.

PHS efficiency is the ratio of electricity delivered to the sum of electricity delivered and electricity used to pump the water. The 2020-2050 mean PHS round-trip efficiency estimated here (80%) can be compared with the U.S.-average value in 2019 of 79% (EIA, 2021a).

The CSP-PCM cost is for the PCM material and storage tanks. In the model, only the heat captured by the working fluid due to reflection of sunlight off of CSP mirrors can be stored. The three CSP-PCM efficiencies are as follows. 55% of incoming sunlight is reflected to the central tower, where it is absorbed by the working fluid (the remaining 45% of sunlight is lost to reflection and absorption by the CSP mirrors); without storage, 28.72% of heat absorbed by the working fluid is converted to electricity (the remaining 71.28% of heat is lost); and with storage, 99% of heat received by the working fluid that goes into storage is recovered and available to the steam turbine after storage (Mancini, 2006) and, of that, 28.72% is converted to electricity. Thus, the overall efficiency of CSP without storage is 15.785% and that with storage is 15.638%.

Irvine and Rinaldo (2020) project LI battery cell costs for Tesla batteries to be ~\$25/kWh by 2035. We estimate that the total system cost for an installed battery pack will be more than twice this, ~\$60/kWh, by 2035 and take this as the mean between 2020 and 2050. For LI battery storage, the 2020-2050 mean round-trip efficiency is taken as the roundtrip efficiency of a 2021 Tesla Powerpack with four hours of storage (Tesla, 2021). Battery efficiency is the ratio of electricity delivered to electricity put into the battery.

CW-STES, ICE, HW-STES, and UTES costs were updated to reflect average values between 2020 and 2050 rather than values in 2016, which they were previously based on. UTES costs were also updated with data from Denmark (Jacobson, 2020, p. 65). In addition, the thermal energy storage (CW-STES, ICE, HW-STES, and UTES) costs in \$/kW-th were multiplied by the mean coefficient of performance (COP) of heat pumps used here (=4 kWh-th/kWh/electricity) to give the costs in \$/kW-equivalent electricity. The reason is that most all energy in this study is carried in units of electricity, and heat pumps are assumed to provide heat or cold for thermal storage media. Thus, storage capacities are limited to the electricity needed to produce a larger amount of heat or cold. Since the storage size for heat or coal as equivalent electricity is smaller than the storage size of the heat or cold itself, the storage cost per unit equivalent electricity must be proportionately larger (by a factor of COP) for costs to be calculated consistently. The cost of heat pumps is assumed to be \$160 (132-188)/kW-electricity, or \$40 (33-47)/kW-th, based on data for large heat pumps (> 500 tons) projected to between 2020 and 2050.

CW-STES and HW-STES efficiencies are the ratios of the energy returned as cooling and heating, respectively, after storage, to the electricity input into storage. The UTES efficiency is the fraction of heated fluid entering underground storage that is ultimately returned during the year (either short or long term) as air or water heat for a building.

Storage costs per unit energy generated are the product of the maximum energy storage capacity (Table S13) and the lifecycle-averaged capital cost of storage per unit maximum energy storage capacity (this table), annualized with the same discount rate as for power generators (Table S17), but with average 2020 to 2050 storage lifetimes of 17 (12 to 22) years for batteries and 32.5 (25 to 40) years all other storage, all divided by the annual average end-use load met. At least one stationary storage battery (lithium-iron-phosphate) is warranted up to 15,000 cycles (or 15 years) (Sonnen, 2021). 15,000 cycles is equivalent to one cycle per day (365 cycles per year) for 41.1 years, so this battery may last much longer than the 15 year warranty. As such, the 17-year mean battery life here is likely underestimated.

**Table S19.** Summary of 2050 WWS mean capital costs of new electricity plus heat generators; electricity, heat, cold, and hydrogen storage (including heat pumps to supply district heating and cooling), and all-distance transmission/distribution (\$ trillion in 2020 USD) and mean levelized private costs of energy (LCOE) (USD ¢/kWh-all-energy or ¢/kWh-electricity-replacing-BAU-electricity) averaged over each simulation for each region. Also shown is the energy consumed per year in each case and the resulting aggregate annual energy cost to the region. The last row in each case is the percent increase in the total LCOE and the total annual energy cost if the baseline battery system cost is increased from the mean value in Tables S18 (\$60/kWh-electricity storage) to the high value (\$90/kWh-electricity storage), or a factor of 1.5.

|                                                                | Africa       | Australia    | Canada        | Central America | Central Asia  | China          | Cuba           |
|----------------------------------------------------------------|--------------|--------------|---------------|-----------------|---------------|----------------|----------------|
| Capital cost new generators only (\$tril)                      | 2.871        | 0.470        | 0.456         | 1.146           | 0.895         | 10.102         | 0.073          |
| <b>Cap cost generators-storage-H<sub>2</sub>-HVDC (\$tril)</b> | <b>3.658</b> | <b>0.617</b> | <b>0.645</b>  | <b>1.533</b>    | <b>1.214</b>  | <b>13.333</b>  | <b>0.106</b>   |
| <i>Components of total LCOE (¢/kWh-all-energy)</i>             |              |              |               |                 |               |                |                |
| Short-dist. transmission                                       | 1.050        | 1.050        | 1.050         | 1.050           | 1.050         | 1.050          | 1.050          |
| Long-distance transmission                                     | 0.142        | 0.172        | 0.226         | 0.095           | 0.135         | 0.195          | 0.000          |
| Distribution                                                   | 2.375        | 2.375        | 2.375         | 2.375           | 2.375         | 2.375          | 2.375          |
| Electricity generation                                         | 3.840        | 3.591        | 2.504         | 5.484           | 3.609         | 3.208          | 5.498          |
| Additional hydro turbines                                      | 0            | 0            | 0             | 0               | 0             | 0              | 0              |
| Geothermal + solar thermal heat generation                     | 0.006        | 0.072        | 0.028         | 0.021           | 0.000         | 0.182          | 0.000          |
| LI battery storage                                             | 0.357        | 0.631        | 0.139         | 1.594           | 1.018         | 0.257          | 2.587          |
| CSP-PCM + PHS storage                                          | 0.023        | 0.028        | 0.013         | 0.020           | 0.023         | 0.021          | 0.058          |
| CW-STES + ICE storage                                          | 0.003        | 0.001        | 0.001         | 0.002           | 0.000         | 0.002          | 0.004          |
| HW-STES storage                                                | 0.018        | 0.006        | 0.016         | 0.011           | 0.010         | 0.009          | 0.012          |
| UTES storage                                                   | 0.221        | 0.010        | 0.036         | 0.004           | 0.081         | 0.159          | 0.232          |
| Heat pumps for filling district heating/cooling                | 0.082        | 0.028        | 0.040         | 0.048           | 0.045         | 0.065          | 0.052          |
| H <sub>2</sub> production/compression/storage                  | 0.273        | 0.267        | 0.103         | 0.345           | 0.181         | 0.084          | 0.373          |
| <b>Total LCOE (¢/kWh-all-energy)</b>                           | <b>8.391</b> | <b>8.231</b> | <b>6.530</b>  | <b>11.048</b>   | <b>8.527</b>  | <b>7.605</b>   | <b>12.241</b>  |
| LCOE (¢/kWh-replacing BAU electricity)                         | 7.784        | 7.905        | 6.320         | 10.629          | 8.202         | 7.282          | 11.573         |
| GW annual avg. end-use demand (Table S5)                       | 488.5        | 92.3         | 168.0         | 160.7           | 167.0         | 2,358.8        | 9.0            |
| TWh/y end-use demand (GW x 8,760 h/y)                          | 4,279        | 808          | 1,471         | 1,408           | 1,463         | 20,663         | 79             |
| <b>Annual energy cost (\$billion/yr)</b>                       | <b>359.1</b> | <b>66.5</b>  | <b>96.1</b>   | <b>155.5</b>    | <b>124.7</b>  | <b>1,571.5</b> | <b>9.6</b>     |
| % rise in LCOE & annual cost if 1.5x battery cost              | 2.13         | 3.83         | 1.06          | 7.21            | 5.97          | 1.69           | 10.6           |
|                                                                | Europe       | Haiti        | Iceland       | India           | Israel        | Jamaica        | Japan          |
| Capital cost new generators only (\$tril)                      | 3.909        | 0.045        | 0.002         | 4.776           | 0.082         | 0.019          | 0.888          |
| <b>Cap cost generators-storage-H<sub>2</sub>-HVDC (\$tril)</b> | <b>5.946</b> | <b>0.056</b> | <b>0.0028</b> | <b>6.868</b>    | <b>0.143</b>  | <b>0.023</b>   | <b>1.151</b>   |
| <i>Components of total LCOE (¢/kWh-all-energy)</i>             |              |              |               |                 |               |                |                |
| Short-dist. transmission                                       | 1.050        | 1.050        | 1.050         | 1.050           | 1.050         | 1.050          | 1.050          |
| Long-distance transmission                                     | 0.199        | 0.000        | 0.000         | 0.169           | 0.000         | 0.000          | 0.140          |
| Distribution                                                   | 2.375        | 2.375        | 2.375         | 2.375           | 2.375         | 2.375          | 2.375          |
| Electricity generation                                         | 3.457        | 3.806        | 1.744         | 3.088           | 4.041         | 4.869          | 4.318          |
| Additional hydro turbines                                      | 0            | 0            | 0             | 0               | 0             | 0              | 0              |
| Geothermal + solar thermal heat generation                     | 0.116        | 0.000        | 1.666         | 0.010           | 0.269         | 0.000          | 0.048          |
| LI battery storage                                             | 0.294        | 0.746        | 0.000         | 1.090           | 3.542         | 0.538          | 0.640          |
| CSP-PCM + PHS storage                                          | 0.026        | 0.047        | 0.000         | 0.030           | 0.119         | 0.166          | 0.109          |
| CW-STES + ICE storage                                          | 0.002        | 0.002        | 0.002         | 0.002           | 0.003         | 0.000          | 0.000          |
| HW-STES storage                                                | 0.015        | 0.000        | 0.021         | 0.021           | 0.014         | 0.022          | 0.008          |
| UTES storage                                                   | 0.082        | 0.013        | 0.000         | 0.075           | 0.084         | 0.027          | 0.015          |
| Heat pumps for filling district heating/cooling                | 0.091        | 0.142        | 0.046         | 0.092           | 0.125         | 0.064          | 0.034          |
| H <sub>2</sub> production/compression/storage                  | 0.715        | 0.360        | 0.075         | 0.143           | 0.505         | 0.492          | 0.151          |
| <b>Total LCOE (¢/kWh-all-energy)</b>                           | <b>8.421</b> | <b>8.540</b> | <b>6.979</b>  | <b>8.146</b>    | <b>12.128</b> | <b>9.603</b>   | <b>8.888</b>   |
| LCOE (¢/kWh-replacing BAU electricity)                         | 7.503        | 8.026        | 6.837         | 7.805           | 11.399        | 8.997          | 8.672          |
| GW annual avg. end-use demand (Table S5)                       | 948.7        | 7.8          | 3.2           | 982.4           | 13.1          | 2.6            | 174.5          |
| TWh/y end-use demand (GW x 8,760 h/y)                          | 8,311        | 68           | 28            | 8,606           | 115           | 23             | 1,529          |
| <b>Annual energy cost (\$billion/yr)</b>                       | <b>699.9</b> | <b>5.8</b>   | <b>1.9</b>    | <b>701.0</b>    | <b>14.0</b>   | <b>2.2</b>     | <b>135.9</b>   |
| % rise in LCOE & annual cost if 1.5x battery cost              | 1.74         | 4.37         | 1.52          | 6.69            | 14.6          | 2.80           | 3.60           |
|                                                                | Mauritius    | Mideast      | New Zealand   | Philippines     | Russia        | South America  | Southeast Asia |

|                                                                 |               |               |               |                |              |              |               |
|-----------------------------------------------------------------|---------------|---------------|---------------|----------------|--------------|--------------|---------------|
| Capital cost new generators only (\$/tril)                      | 0.011         | 3.499         | 0.064         | 0.292          | 0.913        | 2.301        | 6.119         |
| <b>Cap cost generators-storage-H<sub>2</sub>-HVDC (\$/tril)</b> | <b>0.023</b>  | <b>4.665</b>  | <b>0.107</b>  | <b>0.393</b>   | <b>1.194</b> | <b>3.502</b> | <b>6.825</b>  |
| <i>Components of total LCOE (¢/kWh-all-energy)</i>              |               |               |               |                |              |              |               |
| Short-dist. transmission                                        | 1.050         | 1.050         | 1.050         | 1.050          | 1.050        | 1.050        | 1.050         |
| Long-distance transmission                                      | 0.000         | 0.159         | 0.097         | 0.088          | 0.208        | 0.221        | 0.121         |
| Distribution                                                    | 2.375         | 2.375         | 2.375         | 2.375          | 2.375        | 2.375        | 2.375         |
| Electricity generation                                          | 4.445         | 3.376         | 3.052         | 4.622          | 3.012        | 4.139        | 7.443         |
| Additional hydro turbines                                       | 0             | 0             | 0             | 0              | 0            | 0            | 0             |
| Geothermal + solar thermal heat generation                      | 0.047         | 0.039         | 0.075         | 0.000          | 0.004        | 0.028        | 0.001         |
| LI battery storage                                              | 0.293         | 0.756         | 1.782         | 1.058          | 0.014        | 0.005        | 0.374         |
| CSP-PCM + PHS storage                                           | 2.577         | 0.018         | 0.055         | 0.078          | 0.010        | 0.020        | 0.026         |
| CW-STES + ICE storage                                           | 0.005         | 0.001         | 0.000         | 0.006          | 0.002        | 0.002        | 0.002         |
| HW-STES storage                                                 | 0.003         | 0.006         | 0.004         | 0.040          | 0.031        | 0.008        | 0.014         |
| UTES storage                                                    | 0.032         | 0.026         | 0.016         | 0.238          | 0.049        | 0.099        | 0.027         |
| Heat pumps for filling district heating/cooling                 | 0.014         | 0.057         | 0.018         | 0.106          | 0.108        | 0.037        | 0.061         |
| H <sub>2</sub> production/compression/storage                   | 1.558         | 0.200         | 0.263         | 0.361          | 0.129        | 1.238        | 0.264         |
| <b>Total LCOE (¢/kWh-all-energy)</b>                            | <b>12.399</b> | <b>8.062</b>  | <b>8.787</b>  | <b>10.022</b>  | <b>6.991</b> | <b>9.221</b> | <b>11.758</b> |
| LCOE (¢/kWh-replacing BAU electricity)                          | 10.792        | 7.761         | 8.478         | 9.266          | 6.663        | 7.822        | 11.378        |
| GW annual avg. end-use demand (Table S5)                        | 2.0           | 708.1         | 17.0          | 41.8           | 254.7        | 467.9        | 591.7         |
| TWh/y end-use demand (GW x 8,760 h/y)                           | 17            | 6,203         | 149           | 366            | 2,231        | 4,099        | 5,183         |
| <b>Annual energy cost (\$billion/yr)</b>                        | <b>2.2</b>    | <b>500.1</b>  | <b>13.1</b>   | <b>36.7</b>    | <b>156.0</b> | <b>378.0</b> | <b>609.4</b>  |
| % rise in LCOE & annual cost if 1.5x battery cost               | 1.18          | 4.69          | 10.14         | 5.28           | 0.10         | 0.03         | 1.59          |
|                                                                 | South Korea   | Taiwan        | United States | All regions    |              |              |               |
| Capital cost new generators only (\$/tril)                      | 1.351         | 0.596         | 4.816         | 45.696         |              |              |               |
| <b>Cap cost generators-storage-H<sub>2</sub>-HVDC (\$/tril)</b> | <b>1.764</b>  | <b>0.986</b>  | <b>6.712</b>  | <b>61.468</b>  |              |              |               |
| <i>Components of total LCOE (¢/kWh-all-energy)</i>              |               |               |               |                |              |              |               |
| Short-dist. transmission                                        | 1.050         | 1.050         | 1.050         | 1.050          |              |              |               |
| Long-distance transmission                                      | 0.000         | 0.000         | 0.187         | 0.172          |              |              |               |
| Distribution                                                    | 2.375         | 2.375         | 2.375         | 2.375          |              |              |               |
| Electricity generation                                          | 6.546         | 4.338         | 3.787         | 3.799          |              |              |               |
| Additional hydro turbines                                       | 0             | 0             | 0             | 0              |              |              |               |
| Geothermal + solar thermal heat generation                      | 0.031         | 0.013         | 0.066         | 0.079          |              |              |               |
| LI battery storage                                              | 2.139         | 3.337         | 0.642         | 0.554          |              |              |               |
| CSP-PCM + PHS storage                                           | 0.095         | 0.066         | 0.020         | 0.027          |              |              |               |
| CW-STES + ICE storage                                           | 0.000         | 0.001         | 0.001         | 0.002          |              |              |               |
| HW-STES storage                                                 | 0.008         | 0.014         | 0.011         | 0.013          |              |              |               |
| UTES storage                                                    | 0.030         | 0.056         | 0.043         | 0.092          |              |              |               |
| Heat pumps for filling district heating/cooling                 | 0.033         | 0.063         | 0.048         | 0.066          |              |              |               |
| H <sub>2</sub> production/compression/storage                   | 0.266         | 0.488         | 0.429         | 0.310          |              |              |               |
| <b>Total LCOE (¢/kWh-all-energy)</b>                            | <b>12.573</b> | <b>11.801</b> | <b>8.657</b>  | <b>8.538</b>   |              |              |               |
| LCOE (¢/kWh-replacing BAU electricity)                          | 12.236        | 11.180        | 8.110         | 8.046          |              |              |               |
| GW annual avg. end-use demand (Table S5)                        | 151.3         | 90.7          | 979.0         | 8,880.6        |              |              |               |
| TWh/y end-use demand (GW x 8,760 h/y)                           | 1,325         | 795           | 8,576         | 77,794         |              |              |               |
| <b>Annual energy cost (\$billion/yr)</b>                        | <b>166.6</b>  | <b>93.8</b>   | <b>742.4</b>  | <b>6,641.9</b> |              |              |               |
| % rise in LCOE & annual cost if 1.5x battery cost               | 8.51          | 14.1          | 3.71          | 3.25           |              |              |               |

LI=lithium ion; CSP=concentrated solar power; PCM=Phase-change materials; PHS=pumped hydropower storage; CW-STES=Chilled-water sensible heat thermal energy storage; ICE=ice storage; HW-STES=Hot water sensible heat thermal energy storage; and UTES=Underground thermal energy storage (either boreholes, water pits, or aquifers).

The LCOEs are derived from capital costs, annual O&M, and end-of-life decommissioning costs that vary by technology (Table S17) and that are a function of lifetime (Table S17) and a social discount rate for an intergenerational project of 2.0 (1-3)%, all divided by the total annualized end-use demand met, given in the present table. Capital costs are an average between 2020 and 2050, as are the LCOEs.

Capital cost of generators-storage-H<sub>2</sub>-HVDC (\$trillion) is the capital cost of new electricity and heat generators; electricity, heat, cold, and hydrogen storage; hydrogen electrolyzers and compressors; and long-distance (HVDC) transmission.

Since the total end-use load includes heat, cold, hydrogen, and electricity loads (all energy), the “electricity generator” cost, for example, is a cost per unit all energy rather than per unit electricity alone. The ‘Total LCOE’ gives the overall cost of energy, and the ‘Electricity LCOE’ gives the cost of energy for the electricity portion of load replacing BAU electricity end use. It is the total LCOE less the costs for UTES and HW-STES storage, H<sub>2</sub>, and less the portion of long-distance transmission associated with H<sub>2</sub>.

Short-distance transmission costs are \$0.0105 (0.01-0.011)/kWh.

Distribution costs are \$0.02375 (0.023-0.0245)/kWh.

Long-distance transmission costs are \$0.0089 (0.0042-0.010)/kWh (in USD 2020) (Jacobson et al., 2017, but brought up to USD 2020), which assumes 1,500 to 2,000 km HVDC lines, a capacity factor usage of the lines of ~50% and a capital cost of ~\$400 (300-460)/MWtr-km. Table S14 gives the total HVDC line length and capacity and the fraction of all non-rooftop-PV and non-shed electricity generated that is subject to HVDC transmission by region. Storage costs are derived as described in Table S18.

H<sub>2</sub> costs are derived as in Note S38 and Note S43 of Jacobson et al. (2019). These costs exclude electricity costs, which are included separately in the present table.

**Table S20.** 2050 regional and country annual-average end-use (a) BAU load and (b) WWS load; (c) percentage difference between WWS and BAU load; (d) present value of the mean total capital cost for new WWS electricity, heat, cold, and hydrogen generation and storage and all-distance transmission and distribution; mean levelized private costs of all (e) BAU and (f) WWS energy (¢/kWh-all-energy-sectors, averaged between today and 2050); (g) mean WWS private (equals social) energy cost per year, (h) mean BAU private energy cost per year, (i) mean BAU health cost per year, (j) mean BAU climate cost per year, (k) BAU total social cost per year; (l) percentage difference between WWS and BAU private energy cost; and (m) percentage difference between WWS and BAU social energy cost. All costs are in 2020 USD. H=8760 hours per year.

| Region or country      | (a) <sup>1</sup><br>2050<br>BAU<br>Annual<br>average<br>end-use<br>load<br>(GW) | (b) <sup>1</sup><br>2050<br>WWS<br>Annual<br>average<br>end-use<br>load<br>(GW) | (c)<br>2050<br>WWS<br>minus<br>BAU<br>load =<br>(b-a)/a<br>(%) | (d) <sup>2</sup><br>WWS<br>mean<br>total<br>capital<br>cost<br>(\$tril<br>2020) | (e) <sup>3</sup><br>BAU<br>mean<br>private<br>energy<br>cost<br>(¢/kWh<br>-all<br>energy) | (f) <sup>4</sup><br>WWS<br>mean<br>private<br>energy<br>cost<br>(¢/kWh<br>-all<br>energy) | (g) <sup>5</sup><br>WWS<br>mean<br>annual<br>all-<br>energy<br>private<br>and<br>social<br>cost =<br>bfH<br>(\$bil/y) | (h) <sup>5</sup><br>BAU<br>mean<br>annual<br>all-<br>energy<br>private<br>cost =<br>aeH<br>(\$bil/y) | (i) <sup>6</sup><br>BAU<br>mean<br>annual<br>BAU<br>health<br>cost<br>(\$bil/y<br>) | (j) <sup>7</sup><br>BAU<br>mean<br>annual<br>climate<br>cost<br>(\$bil/y) | (k)<br>BAU<br>mean<br>annual<br>BAU<br>total<br>social<br>cost<br>=h+i+j<br>(\$bil/y) | (l)<br>WWS<br>minus<br>BAU<br>private<br>energy<br>cost =<br>(g-h)/h<br>(%) | (m)<br>WWS<br>minus<br>BAU<br>social<br>energy<br>cost =<br>(g-k)/k<br>(%) |
|------------------------|---------------------------------------------------------------------------------|---------------------------------------------------------------------------------|----------------------------------------------------------------|---------------------------------------------------------------------------------|-------------------------------------------------------------------------------------------|-------------------------------------------------------------------------------------------|-----------------------------------------------------------------------------------------------------------------------|------------------------------------------------------------------------------------------------------|-------------------------------------------------------------------------------------|---------------------------------------------------------------------------|---------------------------------------------------------------------------------------|-----------------------------------------------------------------------------|----------------------------------------------------------------------------|
| <b>Africa</b>          | <b>1,382</b>                                                                    | <b>488.5</b>                                                                    | <b>-64.7</b>                                                   | <b>3.658</b>                                                                    | <b>10.09</b>                                                                              | <b>8.39</b>                                                                               | <b>359.1</b>                                                                                                          | <b>1,222</b>                                                                                         | <b>3,982</b>                                                                        | <b>1,782.6</b>                                                            | <b>6,987</b>                                                                          | <b>-70.6</b>                                                                | <b>-94.9</b>                                                               |
| Algeria                | 142.7                                                                           | 43.3                                                                            | -69.7                                                          | 0.322                                                                           | 10.09                                                                                     | 8.39                                                                                      | 31.8                                                                                                                  | 126.1                                                                                                | 74.7                                                                                | 228.6                                                                     | 429                                                                                   | -74.8                                                                       | -92.6                                                                      |
| Angola                 | 24.5                                                                            | 8.0                                                                             | -67.4                                                          | 0.060                                                                           | 10.09                                                                                     | 8.39                                                                                      | 5.9                                                                                                                   | 21.7                                                                                                 | 94.0                                                                                | 32.7                                                                      | 148                                                                                   | -72.9                                                                       | -96.0                                                                      |
| Benin                  | 11.0                                                                            | 2.9                                                                             | -73.8                                                          | 0.029                                                                           | 10.09                                                                                     | 8.39                                                                                      | 2.1                                                                                                                   | 9.8                                                                                                  | 33.7                                                                                | 10.3                                                                      | 54                                                                                    | -78.2                                                                       | -96.0                                                                      |
| Botswana               | 5.4                                                                             | 2.2                                                                             | -60.3                                                          | 0.014                                                                           | 10.09                                                                                     | 8.39                                                                                      | 1.6                                                                                                                   | 4.8                                                                                                  | 6.8                                                                                 | 8.9                                                                       | 20                                                                                    | -67.0                                                                       | -92.3                                                                      |
| Cameroon               | 15.8                                                                            | 4.4                                                                             | -72.1                                                          | 0.038                                                                           | 10.09                                                                                     | 8.39                                                                                      | 3.2                                                                                                                   | 14.0                                                                                                 | 68.9                                                                                | 12.8                                                                      | 96                                                                                    | -76.8                                                                       | -96.6                                                                      |
| Congo                  | 4.6                                                                             | 1.4                                                                             | -70.4                                                          | 0.015                                                                           | 10.09                                                                                     | 8.39                                                                                      | 1.0                                                                                                                   | 4.0                                                                                                  | 19.5                                                                                | 7.4                                                                       | 31                                                                                    | -75.4                                                                       | -96.8                                                                      |
| Congo, DR              | 35.8                                                                            | 8.5                                                                             | -76.2                                                          | 0.077                                                                           | 10.09                                                                                     | 8.39                                                                                      | 6.3                                                                                                                   | 31.6                                                                                                 | 77.1                                                                                | 3.8                                                                       | 112                                                                                   | -80.2                                                                       | -94.4                                                                      |
| Côte d'Ivoire          | 16.6                                                                            | 5.2                                                                             | -68.4                                                          | 0.046                                                                           | 10.09                                                                                     | 8.39                                                                                      | 3.9                                                                                                                   | 14.7                                                                                                 | 97.0                                                                                | 17.2                                                                      | 129                                                                                   | -73.7                                                                       | -97.0                                                                      |
| Egypt                  | 186.8                                                                           | 87.2                                                                            | -53.3                                                          | 0.590                                                                           | 10.09                                                                                     | 8.39                                                                                      | 64.1                                                                                                                  | 165.1                                                                                                | 373.0                                                                               | 323.3                                                                     | 861                                                                                   | -61.2                                                                       | -92.6                                                                      |
| Equat. Guinea          | 6.6                                                                             | 4.2                                                                             | -36.5                                                          | 0.046                                                                           | 10.09                                                                                     | 8.39                                                                                      | 3.1                                                                                                                   | 5.8                                                                                                  | 9.0                                                                                 | 4.4                                                                       | 19                                                                                    | -47.2                                                                       | -84.0                                                                      |
| Eritrea                | 1.1                                                                             | 0.3                                                                             | -72.2                                                          | 0.002                                                                           | 10.09                                                                                     | 8.39                                                                                      | 0.2                                                                                                                   | 1.0                                                                                                  | 10.9                                                                                | 0.9                                                                       | 13                                                                                    | -76.9                                                                       | -98.3                                                                      |
| Ethiopia               | 76.9                                                                            | 18.1                                                                            | -76.4                                                          | 0.124                                                                           | 10.09                                                                                     | 8.39                                                                                      | 13.3                                                                                                                  | 68.0                                                                                                 | 243.5                                                                               | 23.1                                                                      | 335                                                                                   | -80.4                                                                       | -96.0                                                                      |
| Gabon                  | 11.8                                                                            | 7.3                                                                             | -38.6                                                          | 0.078                                                                           | 10.09                                                                                     | 8.39                                                                                      | 5.3                                                                                                                   | 10.5                                                                                                 | 8.5                                                                                 | 4.4                                                                       | 23                                                                                    | -49.0                                                                       | -77.2                                                                      |
| Ghana                  | 20.7                                                                            | 8.6                                                                             | -58.5                                                          | 0.079                                                                           | 10.09                                                                                     | 8.39                                                                                      | 6.3                                                                                                                   | 18.3                                                                                                 | 83.4                                                                                | 21.3                                                                      | 123                                                                                   | -65.5                                                                       | -94.9                                                                      |
| Kenya                  | 37.1                                                                            | 10.7                                                                            | -71.1                                                          | 0.076                                                                           | 10.09                                                                                     | 8.39                                                                                      | 7.9                                                                                                                   | 32.8                                                                                                 | 46.7                                                                                | 25.1                                                                      | 105                                                                                   | -76.0                                                                       | -92.5                                                                      |
| Libya                  | 31.4                                                                            | 14.0                                                                            | -55.5                                                          | 0.118                                                                           | 10.09                                                                                     | 8.39                                                                                      | 10.3                                                                                                                  | 27.8                                                                                                 | 20.0                                                                                | 65.9                                                                      | 114                                                                                   | -63.0                                                                       | -91.0                                                                      |
| Morocco                | 44.6                                                                            | 19.4                                                                            | -56.4                                                          | 0.135                                                                           | 10.09                                                                                     | 8.39                                                                                      | 14.3                                                                                                                  | 39.4                                                                                                 | 57.1                                                                                | 93.6                                                                      | 190                                                                                   | -63.8                                                                       | -92.5                                                                      |
| Mozambique             | 12.7                                                                            | 5.3                                                                             | -57.9                                                          | 0.034                                                                           | 10.09                                                                                     | 8.39                                                                                      | 3.9                                                                                                                   | 11.2                                                                                                 | 36.3                                                                                | 11.7                                                                      | 59                                                                                    | -65.0                                                                       | -93.4                                                                      |
| Namibia                | 5.1                                                                             | 2.0                                                                             | -61.3                                                          | 0.015                                                                           | 10.09                                                                                     | 8.39                                                                                      | 1.4                                                                                                                   | 4.5                                                                                                  | 6.2                                                                                 | 5.6                                                                       | 16                                                                                    | -67.8                                                                       | -91.1                                                                      |
| Niger                  | 6.3                                                                             | 1.6                                                                             | -74.2                                                          | 0.014                                                                           | 10.09                                                                                     | 8.39                                                                                      | 1.2                                                                                                                   | 5.5                                                                                                  | 63.1                                                                                | 3.0                                                                       | 72                                                                                    | -78.5                                                                       | -98.3                                                                      |
| Nigeria                | 294.0                                                                           | 74.1                                                                            | -74.8                                                          | 0.631                                                                           | 10.09                                                                                     | 8.39                                                                                      | 54.5                                                                                                                  | 260.0                                                                                                | 1,972                                                                               | 127.0                                                                     | 2,358                                                                                 | -79.1                                                                       | -97.7                                                                      |
| Senegal                | 6.9                                                                             | 2.7                                                                             | -60.9                                                          | 0.020                                                                           | 10.09                                                                                     | 8.39                                                                                      | 2.0                                                                                                                   | 6.1                                                                                                  | 28.6                                                                                | 12.4                                                                      | 47                                                                                    | -67.5                                                                       | -95.8                                                                      |
| South Africa           | 234.2                                                                           | 105.0                                                                           | -55.2                                                          | 0.708                                                                           | 10.09                                                                                     | 8.39                                                                                      | 77.2                                                                                                                  | 207.1                                                                                                | 118.2                                                                               | 626.4                                                                     | 952                                                                                   | -62.7                                                                       | -91.9                                                                      |
| South Sudan            | 1.4                                                                             | 0.4                                                                             | -71.9                                                          | 0.003                                                                           | 10.09                                                                                     | 8.39                                                                                      | 0.3                                                                                                                   | 1.2                                                                                                  | 34.2                                                                                | 1.5                                                                       | 37                                                                                    | -76.6                                                                       | -99.2                                                                      |
| Sudan                  | 32.0                                                                            | 11.4                                                                            | -64.3                                                          | 0.080                                                                           | 10.09                                                                                     | 8.39                                                                                      | 8.4                                                                                                                   | 28.3                                                                                                 | 215.3                                                                               | 27.0                                                                      | 271                                                                                   | -70.3                                                                       | -96.9                                                                      |
| Tanzania               | 38.1                                                                            | 11.6                                                                            | -69.5                                                          | 0.096                                                                           | 10.09                                                                                     | 8.39                                                                                      | 8.6                                                                                                                   | 33.7                                                                                                 | 73.6                                                                                | 16.9                                                                      | 124                                                                                   | -74.6                                                                       | -93.1                                                                      |
| Togo                   | 4.5                                                                             | 1.2                                                                             | -73.0                                                          | 0.013                                                                           | 10.09                                                                                     | 8.39                                                                                      | 0.9                                                                                                                   | 4.0                                                                                                  | 18.1                                                                                | 3.6                                                                       | 26                                                                                    | -77.5                                                                       | -96.5                                                                      |
| Tunisia                | 30.0                                                                            | 10.8                                                                            | -64.0                                                          | 0.080                                                                           | 10.09                                                                                     | 8.39                                                                                      | 7.9                                                                                                                   | 26.5                                                                                                 | 25.5                                                                                | 40.6                                                                      | 93                                                                                    | -70.0                                                                       | -91.4                                                                      |
| Zambia                 | 21.9                                                                            | 10.3                                                                            | -53.0                                                          | 0.072                                                                           | 10.09                                                                                     | 8.39                                                                                      | 7.6                                                                                                                   | 19.3                                                                                                 | 49.3                                                                                | 9.5                                                                       | 78                                                                                    | -60.9                                                                       | -90.3                                                                      |
| Zimbabwe               | 21.5                                                                            | 6.4                                                                             | -70.2                                                          | 0.043                                                                           | 10.09                                                                                     | 8.39                                                                                      | 4.7                                                                                                                   | 19.0                                                                                                 | 18.7                                                                                | 13.8                                                                      | 51                                                                                    | -75.2                                                                       | -90.9                                                                      |
| <b>Australia</b>       | <b>208.8</b>                                                                    | <b>92.3</b>                                                                     | <b>-55.8</b>                                                   | <b>0.617</b>                                                                    | <b>10.28</b>                                                                              | <b>8.23</b>                                                                               | <b>66.5</b>                                                                                                           | <b>188.0</b>                                                                                         | <b>34.6</b>                                                                         | <b>399.5</b>                                                              | <b>622</b>                                                                            | <b>-64.6</b>                                                                | <b>-89.3</b>                                                               |
| <b>Canada</b>          | <b>442.5</b>                                                                    | <b>168.0</b>                                                                    | <b>-62.0</b>                                                   | <b>0.645</b>                                                                    | <b>8.03</b>                                                                               | <b>6.53</b>                                                                               | <b>96.1</b>                                                                                                           | <b>311.3</b>                                                                                         | <b>42.3</b>                                                                         | <b>518.3</b>                                                              | <b>872</b>                                                                            | <b>-69.1</b>                                                                | <b>-89.0</b>                                                               |
| <b>Central America</b> | <b>378.2</b>                                                                    | <b>160.7</b>                                                                    | <b>-57.5</b>                                                   | <b>1.533</b>                                                                    | <b>10.49</b>                                                                              | <b>11.05</b>                                                                              | <b>155.5</b>                                                                                                          | <b>347.6</b>                                                                                         | <b>323.5</b>                                                                        | <b>588.9</b>                                                              | <b>1,260</b>                                                                          | <b>-55.3</b>                                                                | <b>-87.7</b>                                                               |
| Costa Rica             | 8.6                                                                             | 4.0                                                                             | -53.4                                                          | 0.032                                                                           | 10.49                                                                                     | 11.05                                                                                     | 3.9                                                                                                                   | 7.9                                                                                                  | 6.6                                                                                 | 8.9                                                                       | 23                                                                                    | -50.9                                                                       | -83.4                                                                      |
| El Salvador            | 5.5                                                                             | 2.5                                                                             | -55.2                                                          | 0.021                                                                           | 10.49                                                                                     | 11.05                                                                                     | 2.4                                                                                                                   | 5.1                                                                                                  | 7.4                                                                                 | 7.1                                                                       | 20                                                                                    | -52.8                                                                       | -87.8                                                                      |
| Guatemala              | 20.2                                                                            | 6.1                                                                             | -69.9                                                          | 0.056                                                                           | 10.49                                                                                     | 11.05                                                                                     | 5.9                                                                                                                   | 18.6                                                                                                 | 32.0                                                                                | 21.1                                                                      | 72                                                                                    | -68.3                                                                       | -91.8                                                                      |
| Honduras               | 8.2                                                                             | 3.1                                                                             | -61.8                                                          | 0.036                                                                           | 10.49                                                                                     | 11.05                                                                                     | 3.0                                                                                                                   | 7.5                                                                                                  | 10.7                                                                                | 10.3                                                                      | 28                                                                                    | -59.8                                                                       | -89.4                                                                      |
| Mexico                 | 312.5                                                                           | 136.8                                                                           | -56.2                                                          | 1.295                                                                           | 10.49                                                                                     | 11.05                                                                                     | 132.4                                                                                                                 | 287.1                                                                                                | 252.4                                                                               | 524.1                                                                     | 1,064                                                                                 | -53.9                                                                       | -87.6                                                                      |
| Nicaragua              | 4.7                                                                             | 1.7                                                                             | -64.2                                                          | 0.019                                                                           | 10.49                                                                                     | 11.05                                                                                     | 1.6                                                                                                                   | 4.3                                                                                                  | 8.3                                                                                 | 5.8                                                                       | 18                                                                                    | -62.3                                                                       | -91.1                                                                      |



|                     |                |                |              |               |              |              |                |                |               |                |               |              |              |
|---------------------|----------------|----------------|--------------|---------------|--------------|--------------|----------------|----------------|---------------|----------------|---------------|--------------|--------------|
| Panama              | 18.5           | 6.5            | -65.0        | 0.074         | 10.49        | 11.05        | 6.3            | 17.0           | 6.2           | 11.6           | 35            | -63.2        | -82.0        |
| <b>Central Asia</b> | <b>446.5</b>   | <b>167.0</b>   | <b>-62.6</b> | <b>1.214</b>  | <b>10.30</b> | <b>8.53</b>  | <b>124.7</b>   | <b>402.7</b>   | <b>1,011</b>  | <b>699.6</b>   | <b>2,114</b>  | <b>-69.0</b> | <b>-94.1</b> |
| Kazakhstan          | 87.2           | 33.2           | -61.9        | 0.222         | 10.30        | 8.53         | 24.8           | 78.6           | 91.5          | 235.7          | 406           | -68.5        | -93.9        |
| Kyrgyz Rep.         | 7.3            | 3.4            | -52.9        | 0.018         | 10.30        | 8.53         | 2.6            | 6.6            | 16.0          | 10.1           | 33            | -61.0        | -92.1        |
| Pakistan            | 233.1          | 97.6           | -58.1        | 0.764         | 10.30        | 8.53         | 72.9           | 210.2          | 795.7         | 288.5          | 1,294         | -65.3        | -94.4        |
| Tajikistan          | 5.8            | 3.5            | -40.1        | 0.011         | 10.30        | 8.53         | 2.6            | 5.2            | 19.6          | 7.6            | 32            | -50.4        | -92.0        |
| Turkmenistan        | 40.0           | 8.7            | -78.1        | 0.062         | 10.30        | 8.53         | 6.5            | 36.0           | 20.2          | 76.9           | 133           | -81.9        | -95.1        |
| Uzbekistan          | 73.2           | 20.5           | -72.0        | 0.138         | 10.30        | 8.53         | 15.3           | 66.0           | 68.3          | 80.7           | 215           | -76.8        | -92.9        |
| <b>China Region</b> | <b>5,076.3</b> | <b>2,358.8</b> | <b>-53.5</b> | <b>13.333</b> | <b>9.55</b>  | <b>7.61</b>  | <b>1,571.5</b> | <b>4,248.4</b> | <b>10,757</b> | <b>8,495.7</b> | <b>23,501</b> | <b>-63.0</b> | <b>-93.3</b> |
| China               | 4,970.5        | 2,317.0        | -53.4        | 13.016        | 9.55         | 7.61         | 1,543.7        | 4,159.8        | 10,602        | 8,338.2        | 23,100        | -62.9        | -93.3        |
| Hong Kong           | 82.7           | 30.5           | -63.1        | 0.255         | 9.55         | 7.61         | 20.3           | 69.2           | 54.7          | 56.8           | 181           | -70.6        | -88.7        |
| Korea, DPR          | 13.3           | 7.3            | -45.2        | 0.038         | 9.55         | 7.61         | 4.9            | 11.2           | 81.8          | 54.4           | 147           | -56.4        | -96.7        |
| Mongolia            | 9.9            | 4.0            | -59.6        | 0.025         | 9.55         | 7.61         | 2.7            | 8.3            | 18.3          | 46.4           | 73            | -67.8        | -96.4        |
| <b>Cuba</b>         | <b>15.8</b>    | <b>9.0</b>     | <b>-42.9</b> | <b>0.106</b>  | <b>11.64</b> | <b>12.24</b> | <b>9.6</b>     | <b>16.1</b>    | <b>37.5</b>   | <b>30.9</b>    | <b>84</b>     | <b>-40.0</b> | <b>-88.6</b> |
| <b>Europe</b>       | <b>2,287.7</b> | <b>948.7</b>   | <b>-58.5</b> | <b>5.946</b>  | <b>10.01</b> | <b>8.42</b>  | <b>699.9</b>   | <b>2,005.4</b> | <b>1,772</b>  | <b>2,858</b>   | <b>6,635</b>  | <b>-65.1</b> | <b>-89.5</b> |
| Albania             | 4.4            | 2.1            | -52.8        | 0.011         | 10.01        | 8.42         | 1.5            | 3.9            | 14.3          | 4.8            | 23            | -60.3        | -93.3        |
| Austria             | 47.9           | 20.6           | -57.0        | 0.119         | 10.01        | 8.42         | 15.2           | 42.0           | 20.3          | 53.3           | 116           | -63.8        | -86.9        |
| Belarus             | 37.5           | 12.8           | -66.0        | 0.085         | 10.01        | 8.42         | 9.4            | 32.9           | 50.2          | 56.3           | 139           | -71.4        | -93.3        |
| Belgium             | 73.3           | 30.2           | -58.9        | 0.182         | 10.01        | 8.42         | 22.3           | 64.3           | 26.1          | 76.9           | 167           | -65.4        | -86.7        |
| Bosnia-Herzeg.      | 9.0            | 3.7            | -59.1        | 0.022         | 10.01        | 8.42         | 2.7            | 7.9            | 29.1          | 28.5           | 65            | -65.6        | -95.9        |
| Bulgaria            | 22.4           | 10.0           | -55.1        | 0.074         | 10.01        | 8.42         | 7.4            | 19.6           | 38.2          | 36.8           | 95            | -62.2        | -92.2        |
| Croatia             | 14.8           | 5.9            | -59.9        | 0.041         | 10.01        | 8.42         | 4.4            | 13.0           | 21.5          | 16.3           | 51            | -66.3        | -91.4        |
| Cyprus              | 4.2            | 1.9            | -54.9        | 0.014         | 10.01        | 8.42         | 1.4            | 3.7            | 3.6           | 6.3            | 14            | -62.1        | -89.7        |
| Czech Rep.          | 43.9           | 18.0           | -59.1        | 0.116         | 10.01        | 8.42         | 13.3           | 38.5           | 32.0          | 77.8           | 148           | -65.6        | -91.1        |
| Denmark             | 26.1           | 9.8            | -62.3        | 0.056         | 10.01        | 8.42         | 7.3            | 22.9           | 11.7          | 22.9           | 57            | -68.2        | -87.4        |
| Estonia             | 6.0            | 2.1            | -64.6        | 0.016         | 10.01        | 8.42         | 1.6            | 5.3            | 2.8           | 13.6           | 22            | -70.2        | -92.8        |
| Finland             | 42.6           | 22.0           | -48.3        | 0.143         | 10.01        | 8.42         | 16.2           | 37.3           | 6.0           | 32.0           | 75            | -56.5        | -78.4        |
| France              | 248.6          | 111.3          | -55.2        | 0.733         | 10.01        | 8.42         | 82.1           | 217.9          | 115.0         | 231.7          | 565           | -62.3        | -85.5        |
| Germany             | 361.0          | 154.4          | -57.2        | 0.906         | 10.01        | 8.42         | 113.9          | 316.5          | 223.0         | 517.4          | 1,057         | -64.0        | -89.2        |
| Gibraltar           | 6.0            | 1.6            | -73.1        | 0.020         | 10.01        | 8.42         | 1.2            | 5.2            | 0.2           | 0.5            | 6             | -77.3        | -80.2        |
| Greece              | 32.5           | 13.2           | -59.4        | 0.085         | 10.01        | 8.42         | 9.7            | 28.5           | 42.0          | 48.3           | 119           | -65.8        | -91.8        |
| Hungary             | 31.7           | 12.6           | -60.4        | 0.093         | 10.01        | 8.42         | 9.3            | 27.8           | 37.8          | 37.5           | 103           | -66.7        | -91.0        |
| Ireland             | 18.9           | 8.1            | -57.1        | 0.053         | 10.01        | 8.42         | 6.0            | 16.5           | 9.8           | 26.9           | 53            | -63.9        | -88.8        |
| Italy               | 215.7          | 83.9           | -61.1        | 0.545         | 10.01        | 8.42         | 61.9           | 189.1          | 188.7         | 244.1          | 622           | -67.3        | -90.1        |
| Kosovo              | 3.0            | 1.4            | -53.6        | 0.011         | 10.01        | 8.42         | 1.0            | 2.6            | 1.7           | 7.2            | 12            | -61.0        | -91.1        |
| Latvia              | 8.1            | 3.3            | -59.9        | 0.021         | 10.01        | 8.42         | 2.4            | 7.1            | 10.0          | 7.1            | 24            | -66.2        | -90.1        |
| Lithuania           | 12.6           | 4.5            | -64.0        | 0.036         | 10.01        | 8.42         | 3.3            | 11.0           | 14.0          | 11.7           | 37            | -69.7        | -90.9        |
| Luxembourg          | 6.5            | 2.5            | -61.6        | 0.016         | 10.01        | 8.42         | 1.8            | 5.7            | 1.7           | 7.2            | 15            | -67.7        | -87.4        |
| Macedonia           | 3.8            | 1.9            | -49.7        | 0.013         | 10.01        | 8.42         | 1.4            | 3.4            | 11.0          | 7.6            | 22            | -57.6        | -93.5        |
| Malta               | 5.6            | 1.8            | -68.0        | 0.016         | 10.01        | 8.42         | 1.3            | 4.9            | 1.1           | 0.9            | 7             | -73.0        | -81.0        |
| Moldova             | 6.0            | 2.3            | -61.4        | 0.016         | 10.01        | 8.42         | 1.7            | 5.3            | 5.9           | 7.8            | 19            | -67.5        | -91.0        |
| Montenegro          | 1.6            | 0.8            | -49.7        | 0.005         | 10.01        | 8.42         | 0.6            | 1.4            | 3.9           | 3.7            | 9             | -57.7        | -93.5        |
| Netherlands         | 104.5          | 40.9           | -60.9        | 0.249         | 10.01        | 8.42         | 30.2           | 91.6           | 43.8          | 115.2          | 251           | -67.1        | -88.0        |
| Norway              | 47.3           | 20.3           | -57.0        | 0.069         | 10.01        | 8.42         | 15.0           | 41.4           | 7.7           | 35.3           | 84            | -63.8        | -82.2        |
| Poland              | 126.7          | 48.0           | -62.1        | 0.346         | 10.01        | 8.42         | 35.4           | 111.0          | 131.4         | 233.9          | 476           | -68.1        | -92.6        |
| Portugal            | 30.2           | 13.6           | -54.9        | 0.082         | 10.01        | 8.42         | 10.0           | 26.4           | 15.6          | 35.7           | 78            | -62.0        | -87.1        |
| Romania             | 48.4           | 18.8           | -61.2        | 0.116         | 10.01        | 8.42         | 13.8           | 42.4           | 141.8         | 66.8           | 251           | -67.4        | -94.5        |
| Serbia              | 18.8           | 8.8            | -53.3        | 0.061         | 10.01        | 8.42         | 6.5            | 16.5           | 37.6          | 60.1           | 114           | -60.7        | -94.3        |
| Slovakia            | 20.0           | 8.2            | -58.8        | 0.051         | 10.01        | 8.42         | 6.1            | 17.5           | 16.6          | 26.5           | 61            | -65.4        | -90.0        |
| Slovenia            | 8.3            | 3.9            | -53.0        | 0.025         | 10.01        | 8.42         | 2.9            | 7.3            | 5.2           | 11.3           | 24            | -60.4        | -87.9        |
| Spain               | 166.0          | 68.8           | -58.6        | 0.424         | 10.01        | 8.42         | 50.7           | 145.5          | 88.8          | 190.9          | 425           | -65.1        | -88.1        |
| Sweden              | 55.4           | 29.9           | -46.1        | 0.158         | 10.01        | 8.42         | 22.0           | 48.6           | 11.6          | 33.0           | 93            | -54.7        | -76.3        |
| Switzerland         | 32.1           | 15.0           | -53.2        | 0.075         | 10.01        | 8.42         | 11.1           | 28.1           | 13.9          | 29.0           | 71            | -60.6        | -84.4        |
| Ukraine             | 104.2          | 42.1           | -59.6        | 0.277         | 10.01        | 8.42         | 31.1           | 91.3           | 183.2         | 166.9          | 441           | -66.0        | -93.0        |
| United King.        | 232.4          | 87.8           | -62.2        | 0.567         | 10.01        | 8.42         | 64.8           | 203.7          | 153.3         | 268.5          | 626           | -68.2        | -89.6        |
| <b>Haiti Region</b> | <b>19.1</b>    | <b>7.8</b>     | <b>-59.2</b> | <b>0.056</b>  | <b>10.90</b> | <b>8.54</b>  | <b>5.8</b>     | <b>18.3</b>    | <b>36.2</b>   | <b>30.7</b>    | <b>85</b>     | <b>-68.0</b> | <b>-93.1</b> |
| Dominican Rep       | 14.0           | 6.5            | -53.9        | 0.044         | 10.90        | 8.54         | 4.8            | 13.4           | 20.3          | 27.1           | 61            | -63.9        | -92.1        |
| Haiti               | 5.1            | 1.3            | -73.8        | 0.012         | 10.90        | 8.54         | 1.0            | 4.9            | 15.9          | 3.6            | 24            | -79.5        | -95.9        |
| <b>Iceland</b>      | <b>5.6</b>     | <b>3.2</b>     | <b>-42.6</b> | <b>0.0028</b> | <b>7.51</b>  | <b>6.98</b>  | <b>1.9</b>     | <b>3.7</b>     | <b>0.4</b>    | <b>2.9</b>     | <b>7</b>      | <b>-47.5</b> | <b>-72.2</b> |
| <b>India Region</b> | <b>2,010.5</b> | <b>982.4</b>   | <b>-51.1</b> | <b>6.868</b>  | <b>9.88</b>  | <b>8.15</b>  | <b>701.0</b>   | <b>1,739.6</b> | <b>9,472</b>  | <b>3,756.5</b> | <b>14,968</b> | <b>-59.7</b> | <b>-95.3</b> |
| Bangladesh          | 82.7           | 35.8           | -56.7        | 0.294         | 9.88         | 8.15         | 25.6           | 71.5           | 523.1         | 130.5          | 725           | -64.3        | -96.5        |
| India               | 1,870.8        | 926.7          | -50.5        | 6.422         | 9.88         | 8.15         | 661.2          | 1,618.7        | 8,755.        | 3,571.0        | 13,944        | -59.2        | -95.3        |



|                       |                |              |              |              |              |              |              |                |               |                |               |              |              |
|-----------------------|----------------|--------------|--------------|--------------|--------------|--------------|--------------|----------------|---------------|----------------|---------------|--------------|--------------|
| Nepal                 | 28.5           | 8.0          | -71.9        | 0.069        | 9.88         | 8.15         | 5.7          | 24.7           | 99.9          | 19.4           | 144           | -76.9        | -96.0        |
| Sri Lanka             | 28.6           | 11.9         | -58.2        | 0.083        | 9.88         | 8.15         | 8.5          | 24.7           | 94.0          | 35.6           | 154           | -65.6        | -94.5        |
| <b>Israel</b>         | <b>26.1</b>    | <b>13.1</b>  | <b>-49.6</b> | <b>0.143</b> | <b>11.21</b> | <b>12.13</b> | <b>14.0</b>  | <b>25.6</b>    | <b>15.7</b>   | <b>50.3</b>    | <b>92</b>     | <b>-45.5</b> | <b>-84.8</b> |
| <b>Jamaica</b>        | <b>5.5</b>     | <b>2.6</b>   | <b>-53.0</b> | <b>0.023</b> | <b>11.38</b> | <b>9.60</b>  | <b>2.2</b>   | <b>5.5</b>     | <b>3.4</b>    | <b>7.4</b>     | <b>16</b>     | <b>-60.3</b> | <b>-86.6</b> |
| <b>Japan</b>          | <b>355.4</b>   | <b>174.5</b> | <b>-50.9</b> | <b>1.151</b> | <b>10.48</b> | <b>8.89</b>  | <b>135.9</b> | <b>326.3</b>   | <b>261.5</b>  | <b>678.1</b>   | <b>1,266</b>  | <b>-58.3</b> | <b>-89.3</b> |
| <b>Mauritius</b>      | <b>5.2</b>     | <b>2.0</b>   | <b>-61.4</b> | <b>0.023</b> | <b>10.64</b> | <b>12.40</b> | <b>2.2</b>   | <b>4.8</b>     | <b>3.7</b>    | <b>5.5</b>     | <b>14</b>     | <b>-55.0</b> | <b>-84.6</b> |
| <b>Mideast</b>        | <b>1,520.1</b> | <b>708.1</b> | <b>-53.4</b> | <b>4.665</b> | <b>11.39</b> | <b>8.06</b>  | <b>500.1</b> | <b>1,517.3</b> | <b>858.4</b>  | <b>2,900.1</b> | <b>5,276</b>  | <b>-67.0</b> | <b>-90.5</b> |
| Armenia               | 4.8            | 1.5          | -68.1        | 0.008        | 11.39        | 8.06         | 1.1          | 4.8            | 10.1          | 5.0            | 20            | -77.4        | -94.6        |
| Azerbaijan            | 19.1           | 6.5          | -66.0        | 0.047        | 11.39        | 8.06         | 4.6          | 19.1           | 37.8          | 30.6           | 87            | -76.0        | -94.8        |
| Bahrain               | 17.6           | 9.3          | -47.1        | 0.054        | 11.39        | 8.06         | 6.6          | 17.6           | 2.1           | 41.9           | 62            | -62.6        | -89.3        |
| Iran                  | 444.0          | 184.9        | -58.4        | 1.279        | 11.39        | 8.06         | 130.6        | 443.2          | 171.2         | 828.9          | 1,443         | -70.5        | -91.0        |
| Iraq                  | 62.1           | 24.0         | -61.3        | 0.190        | 11.39        | 8.06         | 17.0         | 61.9           | 90.6          | 233.4          | 386           | -72.6        | -95.6        |
| Jordan                | 15.8           | 7.1          | -54.9        | 0.046        | 11.39        | 8.06         | 5.0          | 15.7           | 11.3          | 33.5           | 60            | -68.1        | -91.7        |
| Kuwait                | 57.4           | 24.0         | -58.1        | 0.148        | 11.39        | 8.06         | 17.0         | 57.3           | 12.6          | 116.9          | 187           | -70.3        | -90.9        |
| Lebanon               | 13.2           | 6.5          | -50.9        | 0.042        | 11.39        | 8.06         | 4.6          | 13.2           | 9.0           | 32.4           | 55            | -65.2        | -91.6        |
| Oman                  | 59.9           | 25.5         | -57.4        | 0.168        | 11.39        | 8.06         | 18.0         | 59.8           | 8.3           | 109.6          | 178           | -69.8        | -89.8        |
| Qatar                 | 78.8           | 30.9         | -60.8        | 0.182        | 11.39        | 8.06         | 21.8         | 78.7           | 3.6           | 125.8          | 208           | -72.3        | -89.5        |
| Saudi Arabia          | 349.0          | 185.2        | -46.9        | 1.241        | 11.39        | 8.06         | 130.8        | 348.4          | 124.7         | 725.8          | 1,199         | -62.5        | -89.1        |
| Syria                 | 14.4           | 6.4          | -55.2        | 0.043        | 11.39        | 8.06         | 4.5          | 14.3           | 47.5          | 34.4           | 96            | -68.3        | -95.3        |
| Turkey                | 173.7          | 80.6         | -53.6        | 0.528        | 11.39        | 8.06         | 56.9         | 173.3          | 229.7         | 306.1          | 709           | -67.2        | -92.0        |
| UAE                   | 205.6          | 113.7        | -44.7        | 0.677        | 11.39        | 8.06         | 80.3         | 205.2          | 11.2          | 262.9          | 479           | -60.9        | -83.2        |
| Yemen                 | 4.8            | 1.8          | -61.9        | 0.014        | 11.39        | 8.06         | 1.3          | 4.8            | 88.8          | 12.9           | 106           | -73.0        | -98.8        |
| <b>New Zealand</b>    | <b>32.4</b>    | <b>17.0</b>  | <b>-47.6</b> | <b>0.107</b> | <b>8.11</b>  | <b>8.79</b>  | <b>13.1</b>  | <b>23.0</b>    | <b>5.2</b>    | <b>35.7</b>    | <b>64</b>     | <b>-43.2</b> | <b>-79.5</b> |
| <b>Philippines</b>    | <b>93.9</b>    | <b>41.8</b>  | <b>-55.5</b> | <b>0.393</b> | <b>10.19</b> | <b>10.02</b> | <b>36.7</b>  | <b>83.8</b>    | <b>677.3</b>  | <b>194.3</b>   | <b>955</b>    | <b>-56.2</b> | <b>-96.2</b> |
| <b>Russia Region</b>  | <b>787.8</b>   | <b>254.7</b> | <b>-67.7</b> | <b>1.194</b> | <b>10.18</b> | <b>6.99</b>  | <b>156.0</b> | <b>702.4</b>   | <b>601.8</b>  | <b>1,248.3</b> | <b>2,552</b>  | <b>-77.8</b> | <b>-93.9</b> |
| Georgia               | 8.6            | 3.6          | -57.9        | 0.011        | 10.18        | 6.99         | 2.2          | 7.7            | 31.1          | 11.4           | 50            | -71.1        | -95.6        |
| Russia                | 779.2          | 251.0        | -67.8        | 1.182        | 10.18        | 6.99         | 153.7        | 694.7          | 570.6         | 1,236.8        | 2,502         | -77.9        | -93.9        |
| <b>South America</b>  | <b>1,090.8</b> | <b>467.9</b> | <b>-57.1</b> | <b>3.502</b> | <b>8.44</b>  | <b>9.22</b>  | <b>378.0</b> | <b>806.4</b>   | <b>749.8</b>  | <b>1,161.3</b> | <b>2,718</b>  | <b>-53.1</b> | <b>-86.1</b> |
| Argentina             | 144.4          | 51.0         | -64.7        | 0.310        | 8.44         | 9.22         | 41.2         | 106.8          | 98.3          | 198.1          | 403           | -61.4        | -89.8        |
| Bolivia               | 18.3           | 5.4          | -70.7        | 0.039        | 8.44         | 9.22         | 4.3          | 13.5           | 22.7          | 24.3           | 61            | -67.9        | -92.8        |
| Brazil                | 591.3          | 271.9        | -54.0        | 2.098        | 8.44         | 9.22         | 219.6        | 437.1          | 352.7         | 494.7          | 1,285         | -49.8        | -82.9        |
| Chile                 | 67.5           | 35.2         | -47.9        | 0.216        | 8.44         | 9.22         | 28.4         | 49.9           | 38.6          | 97.1           | 186           | -43.0        | -84.7        |
| Colombia              | 70.5           | 28.2         | -60.0        | 0.234        | 8.44         | 9.22         | 22.8         | 52.1           | 72.8          | 86.0           | 211           | -56.3        | -89.2        |
| Curacao               | 5.2            | 1.5          | -72.2        | 0.013        | 8.44         | 9.22         | 1.2          | 3.9            | 0.1           | 5.9            | 10            | -69.6        | -88.1        |
| Ecuador               | 28.0           | 10.4         | -62.9        | 0.080        | 8.44         | 9.22         | 8.4          | 20.7           | 16.1          | 40.4           | 77            | -59.4        | -89.1        |
| Paraguay              | 12.9           | 5.9          | -54.5        | 0.023        | 8.44         | 9.22         | 4.7          | 9.5            | 12.4          | 8.4            | 30            | -50.3        | -84.4        |
| Peru                  | 47.4           | 19.0         | -59.9        | 0.153        | 8.44         | 9.22         | 15.4         | 35.1           | 77.0          | 55.9           | 168           | -56.1        | -90.8        |
| Suriname              | 1.2            | 0.5          | -58.7        | 0.004        | 8.44         | 9.22         | 0.4          | 0.9            | 1.6           | 2.0            | 4             | -54.8        | -91.1        |
| Trinidad/Tob.         | 15.4           | 5.0          | -67.8        | 0.038        | 8.44         | 9.22         | 4.0          | 11.4           | 2.6           | 32.5           | 46            | -64.8        | -91.4        |
| Uruguay               | 10.0           | 5.2          | -47.8        | 0.031        | 8.44         | 9.22         | 4.2          | 7.4            | 5.2           | 6.5            | 19            | -43.0        | -78.0        |
| Venezuela             | 78.8           | 28.9         | -63.2        | 0.261        | 8.44         | 9.22         | 23.4         | 58.2           | 49.8          | 109.3          | 217           | -59.8        | -89.2        |
| <b>Southeast Asia</b> | <b>1,300.7</b> | <b>591.7</b> | <b>-54.5</b> | <b>6.825</b> | <b>10.39</b> | <b>11.76</b> | <b>609.4</b> | <b>1,183.3</b> | <b>1,936</b>  | <b>2,046.6</b> | <b>5,166</b>  | <b>-48.5</b> | <b>-88.2</b> |
| Brunei                | 5.2            | 1.6          | -70.3        | 0.020        | 10.39        | 11.76        | 1.6          | 4.8            | 0.5           | 9.0            | 14            | -66.4        | -88.9        |
| Cambodia              | 17.3           | 6.9          | -59.8        | 0.059        | 10.39        | 11.76        | 7.1          | 15.7           | 40.4          | 21.3           | 77            | -54.5        | -90.8        |
| Indonesia             | 423.9          | 193.9        | -54.2        | 1.862        | 10.39        | 11.76        | 199.7        | 385.6          | 1,038         | 806.9          | 2,231         | -48.2        | -91.0        |
| Lao PDR               | 7.6            | 2.9          | -62.1        | 0.003        | 10.39        | 11.76        | 2.9          | 6.9            | 31.6          | 8.8            | 47            | -57.1        | -93.8        |
| Malaysia              | 169.0          | 82.6         | -51.1        | 1.057        | 10.39        | 11.76        | 85.1         | 153.7          | 95.6          | 320.9          | 570           | -44.6        | -85.1        |
| Myanmar               | 44.7           | 15.8         | -64.7        | 0.113        | 10.39        | 11.76        | 16.3         | 40.7           | 197.5         | 62.3           | 300           | -60.0        | -94.6        |
| Singapore             | 216.6          | 72.5         | -66.5        | 1.493        | 10.39        | 11.76        | 74.7         | 197.0          | 33.2          | 68.9           | 299           | -62.1        | -75.0        |
| Thailand              | 257.5          | 118.4        | -54.0        | 1.239        | 10.39        | 11.76        | 122.0        | 234.3          | 289.6         | 354.8          | 879           | -47.9        | -86.1        |
| Vietnam               | 159.1          | 97.0         | -39.0        | 0.981        | 10.39        | 11.76        | 99.9         | 144.7          | 209.1         | 393.8          | 748           | -31.0        | -86.6        |
| <b>South Korea</b>    | <b>304.9</b>   | <b>151.3</b> | <b>-50.4</b> | <b>1.764</b> | <b>10.53</b> | <b>12.57</b> | <b>166.6</b> | <b>281.2</b>   | <b>104.4</b>  | <b>526.9</b>   | <b>913</b>    | <b>-40.8</b> | <b>-81.7</b> |
| <b>Taiwan</b>         | <b>165.3</b>   | <b>90.7</b>  | <b>-45.1</b> | <b>0.986</b> | <b>10.60</b> | <b>11.80</b> | <b>93.8</b>  | <b>153.5</b>   | <b>85.9</b>   | <b>357.0</b>   | <b>596</b>    | <b>-38.9</b> | <b>-84.3</b> |
| <b>United States</b>  | <b>2,397.8</b> | <b>979.0</b> | <b>-59.2</b> | <b>6.712</b> | <b>10.42</b> | <b>8.66</b>  | <b>742.4</b> | <b>2,188.6</b> | <b>829.7</b>  | <b>3,381.7</b> | <b>6,400</b>  | <b>-66.1</b> | <b>-88.4</b> |
| <b>All regions</b>    | <b>20,359</b>  | <b>8,881</b> | <b>-56.4</b> | <b>61.5</b>  | <b>9.98</b>  | <b>8.54</b>  | <b>6,642</b> | <b>17,805</b>  | <b>33,601</b> | <b>31,757</b>  | <b>83,163</b> | <b>-62.7</b> | <b>-92.0</b> |

<sup>1</sup>From Table S4.

<sup>2</sup>The total capital cost includes the capital cost of new WWS electricity and heat generators; new electricity, heat, cold, and hydrogen storage equipment; hydrogen electrolyzers and compressors; and long-distance (HVDC) transmission lines. Capital costs are an average between 2020 and 2050.

<sup>3</sup>This is the BAU electricity-sector cost of energy per unit energy. It is assumed to equal the BAU all-energy cost of energy per unit energy and is an average between 2020 and 2050.

- <sup>4</sup>The WWS cost per unit energy is for all energy, which is almost all electricity (plus a small amount of direct heat). It is an average between 2020 and 2050.
- <sup>5</sup>The annual private cost of WWS or BAU energy equals the cost per unit energy from Column (f) or (g), respectively, multiplied by the energy consumed per year, which equals the end-use load from Column (b) or (a), respectively, multiplied by 8,760 hours per year.
- <sup>6</sup>The 2050 annual BAU health cost equals the number of total air pollution mortalities per year in 2050 from Table S21, Column (a), multiplied by 90% (the estimated percentage of total air pollution mortalities that are due to energy) and by a statistical cost of life calculated for each country, calculated as in Jacobson et al. (2019), and a multiplier of 1.15 for morbidity and another multiplier of 1.1 for non-health impacts (Jacobson et al., 2019).
- <sup>7</sup>The 2050 annual BAU climate cost equals the 2050 CO<sub>2</sub>e emissions from Table S21, Column (b), multiplied by the mean social cost of carbon in 2050 from Table S21, Column (f) (in 2020 USD), which is updated from values in Jacobson et al. (2019), which were in 2013 USD.

**Table S21.** Regional (a) estimated air pollution mortalities per year in 2050-2052 due to anthropogenic sources (90% of which are energy); (b) carbon-equivalent emissions (CO<sub>2</sub>e) in the BAU case; (c) cost per tonne-CO<sub>2</sub>e of eliminating CO<sub>2</sub>e with WWS; (d) BAU energy cost per tonne-CO<sub>2</sub>e emitted; (e) BAU health cost per tonne-CO<sub>2</sub>e emitted; (f) BAU climate cost per tonne-CO<sub>2</sub>e emitted; (g) BAU total social cost per tonne-CO<sub>2</sub>e emitted; (h) BAU health cost per unit all-BAU-energy produced; and (i) BAU climate cost per unit-all-BAU-energy produced.

| Region or country      | (a) <sup>1</sup><br>2050<br>BAU air<br>pollution<br>mortal-<br>ities<br>(Deaths/y) | (b) <sup>2</sup><br>2050<br>BAU<br>CO <sub>2</sub> e<br>(Mton-<br>ne/y) | (c) <sup>3</sup><br>2050<br>WWS<br>(\$/<br>tonne-<br>CO <sub>2</sub> e-<br>elim-<br>inated) | (d) <sup>4</sup><br>2050<br>BAU<br>energy<br>cost (\$/<br>tonne-<br>CO <sub>2</sub> e-<br>emitted) | (e) <sup>4</sup><br>2050<br>BAU<br>health<br>cost (\$/<br>tonne-<br>CO <sub>2</sub> e-<br>emitted) | (f) <sup>4</sup><br>2050<br>BAU<br>climate<br>cost (\$/<br>tonne-<br>CO <sub>2</sub> e-<br>emitted) | (g) <sup>4</sup><br>2050<br>BAU<br>social<br>cost =<br>d+e+f<br>(\$/<br>tonne-<br>CO <sub>2</sub> e-<br>emitted) | (h) <sup>5</sup><br>2050<br>BAU<br>health<br>cost<br>(¢/kWh) | (i) <sup>5</sup><br>2050<br>BAU<br>climate<br>cost<br>(¢/kWh) |
|------------------------|------------------------------------------------------------------------------------|-------------------------------------------------------------------------|---------------------------------------------------------------------------------------------|----------------------------------------------------------------------------------------------------|----------------------------------------------------------------------------------------------------|-----------------------------------------------------------------------------------------------------|------------------------------------------------------------------------------------------------------------------|--------------------------------------------------------------|---------------------------------------------------------------|
| <b>Africa</b>          | <b>1,173,737</b>                                                                   | <b>3,192</b>                                                            | <b>112.5</b>                                                                                | <b>383</b>                                                                                         | <b>1,247</b>                                                                                       | <b>558</b>                                                                                          | <b>2,189</b>                                                                                                     | <b>32.9</b>                                                  | <b>14.7</b>                                                   |
| Algeria                | 10,788                                                                             | 409                                                                     | 77.7                                                                                        | 308                                                                                                | 183                                                                                                | 558                                                                                                 | 1,049                                                                                                            | 6.0                                                          | 18.3                                                          |
| Angola                 | 19,997                                                                             | 59                                                                      | 100.5                                                                                       | 371                                                                                                | 1,606                                                                                              | 558                                                                                                 | 2,535                                                                                                            | 43.7                                                         | 15.2                                                          |
| Benin                  | 17,080                                                                             | 18                                                                      | 115.1                                                                                       | 528                                                                                                | 1,822                                                                                              | 558                                                                                                 | 2,908                                                                                                            | 34.9                                                         | 10.7                                                          |
| Botswana               | 940                                                                                | 16                                                                      | 99.4                                                                                        | 301                                                                                                | 424                                                                                                | 558                                                                                                 | 1,283                                                                                                            | 14.2                                                         | 18.7                                                          |
| Cameroon               | 25,940                                                                             | 23                                                                      | 141.3                                                                                       | 610                                                                                                | 3,007                                                                                              | 558                                                                                                 | 4,175                                                                                                            | 49.8                                                         | 9.2                                                           |
| Congo                  | 4,535                                                                              | 13                                                                      | 75.6                                                                                        | 308                                                                                                | 1,482                                                                                              | 559                                                                                                 | 2,349                                                                                                            | 48.6                                                         | 18.3                                                          |
| Congo, DR              | 93,264                                                                             | 7                                                                       | 927.4                                                                                       | 4,678                                                                                              | 11,391                                                                                             | 556                                                                                                 | 16,626                                                                                                           | 24.6                                                         | 1.2                                                           |
| Côte d'Ivoire          | 33,702                                                                             | 31                                                                      | 125.4                                                                                       | 478                                                                                                | 3,157                                                                                              | 558                                                                                                 | 4,193                                                                                                            | 66.7                                                         | 11.8                                                          |
| Egypt                  | 63,218                                                                             | 579                                                                     | 110.7                                                                                       | 285                                                                                                | 644                                                                                                | 558                                                                                                 | 1,488                                                                                                            | 22.8                                                         | 19.8                                                          |
| Equator. Guinea        | 919                                                                                | 8                                                                       | 388.8                                                                                       | 736                                                                                                | 1,140                                                                                              | 559                                                                                                 | 2,435                                                                                                            | 15.6                                                         | 7.7                                                           |
| Eritrea                | 6,912                                                                              | 2                                                                       | 131.5                                                                                       | 569                                                                                                | 6,410                                                                                              | 560                                                                                                 | 7,539                                                                                                            | 113.7                                                        | 9.9                                                           |
| Ethiopia               | 152,676                                                                            | 41                                                                      | 321.9                                                                                       | 1,643                                                                                              | 5,883                                                                                              | 558                                                                                                 | 8,085                                                                                                            | 36.1                                                         | 3.4                                                           |
| Gabon                  | 1,054                                                                              | 8                                                                       | 676.2                                                                                       | 1,325                                                                                              | 1,080                                                                                              | 558                                                                                                 | 2,963                                                                                                            | 8.2                                                          | 4.2                                                           |
| Ghana                  | 25,489                                                                             | 38                                                                      | 165.4                                                                                       | 480                                                                                                | 2,185                                                                                              | 558                                                                                                 | 3,223                                                                                                            | 46.0                                                         | 11.8                                                          |
| Kenya                  | 17,759                                                                             | 45                                                                      | 175.4                                                                                       | 730                                                                                                | 1,039                                                                                              | 558                                                                                                 | 2,328                                                                                                            | 14.4                                                         | 7.7                                                           |
| Libya                  | 2,943                                                                              | 118                                                                     | 87.0                                                                                        | 235                                                                                                | 169                                                                                                | 558                                                                                                 | 963                                                                                                              | 7.3                                                          | 24.0                                                          |
| Morocco                | 10,340                                                                             | 168                                                                     | 85.2                                                                                        | 235                                                                                                | 341                                                                                                | 559                                                                                                 | 1,135                                                                                                            | 14.6                                                         | 23.9                                                          |
| Mozambique             | 24,785                                                                             | 21                                                                      | 187.1                                                                                       | 535                                                                                                | 1,730                                                                                              | 559                                                                                                 | 2,823                                                                                                            | 32.6                                                         | 10.5                                                          |
| Namibia                | 961                                                                                | 10                                                                      | 145.3                                                                                       | 451                                                                                                | 624                                                                                                | 559                                                                                                 | 1,634                                                                                                            | 14.0                                                         | 12.5                                                          |
| Niger                  | 52,061                                                                             | 5                                                                       | 222.5                                                                                       | 1,036                                                                                              | 11,795                                                                                             | 558                                                                                                 | 13,389                                                                                                           | 114.9                                                        | 5.4                                                           |
| Nigeria                | 417,387                                                                            | 227                                                                     | 239.7                                                                                       | 1,144                                                                                              | 8,676                                                                                              | 559                                                                                                 | 10,379                                                                                                           | 76.6                                                         | 4.9                                                           |
| Senegal                | 12,993                                                                             | 22                                                                      | 88.9                                                                                        | 274                                                                                                | 1,286                                                                                              | 559                                                                                                 | 2,119                                                                                                            | 47.5                                                         | 20.6                                                          |
| South Africa           | 18,075                                                                             | 1,122                                                                   | 68.8                                                                                        | 185                                                                                                | 105                                                                                                | 558                                                                                                 | 848                                                                                                              | 5.8                                                          | 30.5                                                          |
| South Sudan            | 19,243                                                                             | 3                                                                       | 102.6                                                                                       | 439                                                                                                | 12,393                                                                                             | 559                                                                                                 | 13,391                                                                                                           | 284.9                                                        | 12.9                                                          |
| Sudan                  | 66,066                                                                             | 48                                                                      | 173.6                                                                                       | 585                                                                                                | 4,447                                                                                              | 558                                                                                                 | 5,590                                                                                                            | 76.7                                                         | 9.6                                                           |
| Tanzania               | 31,178                                                                             | 30                                                                      | 282.7                                                                                       | 1,115                                                                                              | 2,434                                                                                              | 559                                                                                                 | 4,108                                                                                                            | 22.0                                                         | 5.1                                                           |
| Togo                   | 12,450                                                                             | 6                                                                       | 138.3                                                                                       | 616                                                                                                | 2,803                                                                                              | 558                                                                                                 | 3,977                                                                                                            | 45.9                                                         | 9.2                                                           |
| Tunisia                | 4,209                                                                              | 73                                                                      | 109.3                                                                                       | 365                                                                                                | 350                                                                                                | 558                                                                                                 | 1,273                                                                                                            | 9.7                                                          | 15.5                                                          |
| Zambia                 | 15,983                                                                             | 17                                                                      | 444.3                                                                                       | 1,137                                                                                              | 2,897                                                                                              | 559                                                                                                 | 4,593                                                                                                            | 25.7                                                         | 5.0                                                           |
| Zimbabwe               | 10,790                                                                             | 25                                                                      | 190.9                                                                                       | 771                                                                                                | 758                                                                                                | 559                                                                                                 | 2,087                                                                                                            | 9.9                                                          | 7.3                                                           |
| <b>Australia</b>       | <b>3,034</b>                                                                       | <b>716</b>                                                              | <b>93.0</b>                                                                                 | <b>263</b>                                                                                         | <b>48</b>                                                                                          | <b>558</b>                                                                                          | <b>869</b>                                                                                                       | <b>1.9</b>                                                   | <b>21.8</b>                                                   |
| <b>Canada</b>          | <b>3,764</b>                                                                       | <b>928</b>                                                              | <b>103.5</b>                                                                                | <b>335</b>                                                                                         | <b>46</b>                                                                                          | <b>558</b>                                                                                          | <b>939</b>                                                                                                       | <b>1.1</b>                                                   | <b>13.4</b>                                                   |
| <b>Central America</b> | <b>45,608</b>                                                                      | <b>1,055</b>                                                            | <b>147.4</b>                                                                                | <b>329</b>                                                                                         | <b>307</b>                                                                                         | <b>558</b>                                                                                          | <b>1,194</b>                                                                                                     | <b>9.8</b>                                                   | <b>17.8</b>                                                   |
| Costa Rica             | 1,008                                                                              | 16                                                                      | 243.5                                                                                       | 496                                                                                                | 416                                                                                                | 559                                                                                                 | 1,470                                                                                                            | 8.8                                                          | 11.8                                                          |
| El Salvador            | 1,558                                                                              | 13                                                                      | 188.1                                                                                       | 398                                                                                                | 581                                                                                                | 558                                                                                                 | 1,537                                                                                                            | 15.3                                                         | 14.7                                                          |
| Guatemala              | 7,217                                                                              | 38                                                                      | 155.9                                                                                       | 492                                                                                                | 848                                                                                                | 558                                                                                                 | 1,898                                                                                                            | 18.1                                                         | 11.9                                                          |
| Honduras               | 3,162                                                                              | 18                                                                      | 163.7                                                                                       | 407                                                                                                | 581                                                                                                | 558                                                                                                 | 1,546                                                                                                            | 15.0                                                         | 14.4                                                          |
| Mexico                 | 29,973                                                                             | 939                                                                     | 141.0                                                                                       | 306                                                                                                | 269                                                                                                | 558                                                                                                 | 1,133                                                                                                            | 9.2                                                          | 19.1                                                          |
| Nicaragua              | 1,908                                                                              | 10                                                                      | 156.9                                                                                       | 416                                                                                                | 792                                                                                                | 558                                                                                                 | 1,766                                                                                                            | 20.0                                                         | 14.1                                                          |
| Panama                 | 782                                                                                | 21                                                                      | 302.8                                                                                       | 822                                                                                                | 300                                                                                                | 558                                                                                                 | 1,680                                                                                                            | 3.8                                                          | 7.1                                                           |
| <b>Central Asia</b>    | <b>235,560</b>                                                                     | <b>1,253</b>                                                            | <b>99.5</b>                                                                                 | <b>321</b>                                                                                         | <b>807</b>                                                                                         | <b>558</b>                                                                                          | <b>1,687</b>                                                                                                     | <b>25.9</b>                                                  | <b>17.9</b>                                                   |
| Kazakhstan             | 7,774                                                                              | 422                                                                     | 58.8                                                                                        | 186                                                                                                | 217                                                                                                | 558                                                                                                 | 961                                                                                                              | 12.0                                                         | 30.9                                                          |
| Kyrgyz Republic        | 3,796                                                                              | 18                                                                      | 141.8                                                                                       | 363                                                                                                | 883                                                                                                | 558                                                                                                 | 1,805                                                                                                            | 25.0                                                         | 15.8                                                          |
| Pakistan               | 204,993                                                                            | 517                                                                     | 141.1                                                                                       | 407                                                                                                | 1,540                                                                                              | 558                                                                                                 | 2,506                                                                                                            | 39.0                                                         | 14.1                                                          |

|                     |                  |               |              |            |              |            |              |             |             |
|---------------------|------------------|---------------|--------------|------------|--------------|------------|--------------|-------------|-------------|
| Tajikistan          | 5,315            | 14            | 190.5        | 384        | 1,446        | 559        | 2,389        | 38.8        | 15.0        |
| Turkmenistan        | 2,073            | 138           | 47.4         | 262        | 147          | 558        | 967          | 5.8         | 22.0        |
| Uzbekistan          | 11,609           | 145           | 105.9        | 456        | 472          | 558        | 1,487        | 10.7        | 12.6        |
| <b>China Region</b> | <b>1,134,535</b> | <b>15,212</b> | <b>103.3</b> | <b>279</b> | <b>707</b>   | <b>558</b> | <b>1,545</b> | <b>24.2</b> | <b>19.1</b> |
| China               | 1,090,244        | 14,930        | 103.4        | 279        | 710          | 558        | 1,547        | 24.4        | 19.2        |
| Hong Kong           | 3,982            | 102           | 199.8        | 680        | 538          | 558        | 1,776        | 7.6         | 7.8         |
| Korea, DPR          | 37,703           | 97            | 49.9         | 115        | 839          | 559        | 1,512        | 70.0        | 46.6        |
| Mongolia            | 2,606            | 83            | 32.0         | 99         | 221          | 559        | 879          | 21.2        | 53.7        |
| <b>Cuba</b>         | <b>4,851</b>     | <b>55</b>     | <b>174.7</b> | <b>291</b> | <b>679</b>   | <b>559</b> | <b>1,528</b> | <b>27.2</b> | <b>22.3</b> |
| <b>Europe</b>       | <b>179,603</b>   | <b>5,119</b>  | <b>136.7</b> | <b>392</b> | <b>346</b>   | <b>558</b> | <b>1,296</b> | <b>8.8</b>  | <b>14.3</b> |
| Albania             | 1,766            | 9             | 178.8        | 450        | 1,659        | 558        | 2,667        | 36.9        | 12.4        |
| Austria             | 1,741            | 95            | 159.3        | 440        | 213          | 558        | 1,211        | 4.9         | 12.7        |
| Belarus             | 5,001            | 101           | 93.2         | 326        | 497          | 558        | 1,381        | 15.3        | 17.1        |
| Belgium             | 2,294            | 138           | 161.7        | 467        | 189          | 559        | 1,215        | 4.1         | 12.0        |
| Bosnia-Herzeg.      | 3,661            | 51            | 53.2         | 155        | 571          | 559        | 1,284        | 36.9        | 36.1        |
| Bulgaria            | 3,772            | 66            | 112.4        | 298        | 579          | 558        | 1,435        | 19.5        | 18.8        |
| Croatia             | 1,966            | 29            | 150.5        | 446        | 741          | 559        | 1,745        | 16.6        | 12.5        |
| Cyprus              | 280              | 11            | 124.0        | 327        | 318          | 558        | 1,203        | 9.7         | 17.1        |
| Czech Rep.          | 3,217            | 139           | 95.1         | 276        | 229          | 558        | 1,064        | 8.3         | 20.2        |
| Denmark             | 1,003            | 41            | 177.0        | 557        | 284          | 558        | 1,400        | 5.1         | 10.0        |
| Estonia             | 298              | 24            | 64.3         | 216        | 116          | 559        | 891          | 5.4         | 25.9        |
| Finland             | 544              | 57            | 283.8        | 652        | 106          | 558        | 1,315        | 1.6         | 8.6         |
| France              | 10,527           | 415           | 197.9        | 525        | 277          | 558        | 1,360        | 5.3         | 10.6        |
| Germany             | 19,077           | 926           | 122.9        | 342        | 241          | 558        | 1,141        | 7.0         | 16.4        |
| Gibraltar           | 20               | 0.92          | 1,292        | 5,700      | 268          | 558        | 6,526        | 0.5         | 1.0         |
| Greece              | 4,606            | 86            | 112.6        | 330        | 486          | 558        | 1,374        | 14.7        | 17.0        |
| Hungary             | 4,162            | 67            | 138.2        | 415        | 564          | 559        | 1,538        | 13.6        | 13.5        |
| Ireland             | 782              | 48            | 123.8        | 343        | 202          | 558        | 1,104        | 5.9         | 16.3        |
| Italy               | 18,054           | 437           | 141.5        | 432        | 432          | 558        | 1,423        | 10.0        | 12.9        |
| Kosovo              | 276              | 13            | 80.1         | 205        | 133          | 558        | 896          | 6.5         | 27.2        |
| Latvia              | 878              | 13            | 188.4        | 558        | 787          | 558        | 1,902        | 14.1        | 10.0        |
| Lithuania           | 1,346            | 21            | 159.0        | 525        | 669          | 559        | 1,753        | 12.7        | 10.6        |
| Luxembourg          | 103              | 13            | 143.3        | 444        | 133          | 559        | 1,135        | 3.0         | 12.6        |
| Macedonia           | 1,486            | 14            | 105.0        | 248        | 810          | 558        | 1,615        | 32.7        | 22.5        |
| Malta               | 104              | 2             | 825.5        | 3,062      | 722          | 560        | 4,344        | 2.4         | 1.8         |
| Moldova             | 1,384            | 14            | 121.8        | 375        | 418          | 558        | 1,352        | 11.2        | 14.9        |
| Montenegro          | 481              | 7             | 88.7         | 210        | 589          | 558        | 1,357        | 28.1        | 26.6        |
| Netherlands         | 3,352            | 206           | 146.3        | 444        | 212          | 558        | 1,215        | 4.8         | 12.6        |
| Norway              | 567              | 63            | 237.0        | 655        | 121          | 558        | 1,334        | 1.9         | 8.5         |
| Poland              | 14,360           | 419           | 84.6         | 265        | 314          | 558        | 1,137        | 11.8        | 21.1        |
| Portugal            | 1,656            | 64            | 157.1        | 414        | 245          | 558        | 1,217        | 5.9         | 13.5        |
| Romania             | 13,080           | 120           | 115.6        | 354        | 1,185        | 558        | 2,097        | 33.5        | 15.8        |
| Serbia              | 4,208            | 108           | 60.3         | 154        | 350          | 558        | 1,062        | 22.8        | 36.4        |
| Slovakia            | 1,732            | 47            | 128.0        | 369        | 349          | 558        | 1,277        | 9.5         | 15.1        |
| Slovenia            | 533              | 20            | 141.9        | 359        | 258          | 558        | 1,175        | 7.2         | 15.6        |
| Spain               | 8,585            | 342           | 148.4        | 426        | 260          | 558        | 1,244        | 6.1         | 13.1        |
| Sweden              | 979              | 59            | 373.3        | 823        | 196          | 559        | 1,578        | 2.4         | 6.8         |
| Switzerland         | 1,087            | 52            | 213.0        | 541        | 267          | 558        | 1,366        | 4.9         | 10.3        |
| Ukraine             | 26,812           | 299           | 103.9        | 305        | 613          | 558        | 1,477        | 20.1        | 18.3        |
| United Kingdom      | 13,823           | 481           | 134.7        | 423        | 319          | 558        | 1,300        | 7.5         | 13.2        |
| <b>Haiti Region</b> | <b>13,695</b>    | <b>55</b>     | <b>106.3</b> | <b>333</b> | <b>659</b>   | <b>558</b> | <b>1,550</b> | <b>21.6</b> | <b>18.3</b> |
| Dominican Rep.      | 3,217            | 49            | 99.5         | 275        | 419          | 558        | 1,252        | 16.6        | 22.1        |
| Haiti               | 10,478           | 6             | 158.0        | 770        | 2,496        | 558        | 3,824        | 35.4        | 7.9         |
| <b>Iceland</b>      | <b>36</b>        | <b>5</b>      | <b>376.7</b> | <b>717</b> | <b>80</b>    | <b>559</b> | <b>1,356</b> | <b>0.8</b>  | <b>5.8</b>  |
| <b>India Region</b> | <b>1,658,265</b> | <b>6,728</b>  | <b>104.2</b> | <b>259</b> | <b>1,408</b> | <b>558</b> | <b>2,225</b> | <b>53.8</b> | <b>21.3</b> |
| Bangladesh          | 161,682          | 234           | 109.4        | 306        | 2,238        | 558        | 3,103        | 72.2        | 18.0        |
| India               | 1,444,634        | 6,396         | 103.4        | 253        | 1,369        | 558        | 2,180        | 53.4        | 21.8        |
| Nepal               | 38,313           | 35            | 164.5        | 711        | 2,879        | 558        | 4,148        | 40.0        | 7.8         |
| Sri Lanka           | 13,636           | 64            | 133.6        | 388        | 1,476        | 558        | 2,423        | 37.6        | 14.2        |
| <b>Israel</b>       | <b>1,544</b>     | <b>90</b>     | <b>155.0</b> | <b>284</b> | <b>175</b>   | <b>558</b> | <b>1,017</b> | <b>6.9</b>  | <b>22.0</b> |
| <b>Jamaica</b>      | <b>698</b>       | <b>13</b>     | <b>165.0</b> | <b>416</b> | <b>258</b>   | <b>559</b> | <b>1,232</b> | <b>7.1</b>  | <b>15.3</b> |
| <b>Japan</b>        | <b>27,181</b>    | <b>1,215</b>  | <b>111.9</b> | <b>269</b> | <b>215</b>   | <b>558</b> | <b>1,042</b> | <b>8.4</b>  | <b>21.8</b> |

|                       |                  |               |               |            |              |            |              |             |             |
|-----------------------|------------------|---------------|---------------|------------|--------------|------------|--------------|-------------|-------------|
| <b>Mauritius</b>      | <b>418</b>       | <b>10</b>     | <b>219.9</b>  | <b>489</b> | <b>377</b>   | <b>559</b> | <b>1,424</b> | <b>8.2</b>  | <b>12.2</b> |
| <b>Mideast</b>        | <b>118,866</b>   | <b>5,195</b>  | <b>96.3</b>   | <b>292</b> | <b>165</b>   | <b>558</b> | <b>1,016</b> | <b>6.4</b>  | <b>21.8</b> |
| Armenia               | 1,429            | 9             | 119.7         | 530        | 1,117        | 559        | 2,206        | 24.0        | 12.0        |
| Azerbaijan            | 3,755            | 55            | 83.8          | 348        | 689          | 558        | 1,596        | 22.5        | 18.3        |
| Bahrain               | 172              | 75            | 87.8          | 235        | 28           | 558        | 821          | 1.3         | 27.1        |
| Iran                  | 21,479           | 1,485         | 87.9          | 298        | 115          | 558        | 972          | 4.4         | 21.3        |
| Iraq                  | 12,495           | 418           | 40.6          | 148        | 217          | 558        | 923          | 16.7        | 42.9        |
| Jordan                | 1,836            | 60            | 83.8          | 263        | 188          | 558        | 1,009        | 8.2         | 24.2        |
| Kuwait                | 888              | 209           | 81.1          | 274        | 60           | 558        | 892          | 2.5         | 23.3        |
| Lebanon               | 1,289            | 58            | 79.0          | 227        | 156          | 558        | 941          | 7.8         | 28.0        |
| Oman                  | 747              | 196           | 91.9          | 305        | 43           | 558        | 905          | 1.6         | 20.9        |
| Qatar                 | 203              | 225           | 96.9          | 349        | 16           | 558        | 924          | 0.5         | 18.2        |
| Saudi Arabia          | 9,771            | 1,300         | 100.6         | 268        | 96           | 558        | 922          | 4.1         | 23.7        |
| Syria                 | 9,310            | 62            | 73.6          | 233        | 770          | 558        | 1,561        | 37.7        | 27.4        |
| Turkey                | 28,516           | 548           | 103.8         | 316        | 419          | 558        | 1,293        | 15.1        | 20.1        |
| UAE                   | 787              | 471           | 170.5         | 436        | 24           | 558        | 1,018        | 0.6         | 14.6        |
| Yemen                 | 26,189           | 23            | 55.8          | 207        | 3,854        | 559        | 4,620        | 212.0       | 30.7        |
| <b>New Zealand</b>    | <b>444</b>       | <b>64</b>     | <b>204.7</b>  | <b>361</b> | <b>81</b>    | <b>559</b> | <b>1,000</b> | <b>1.8</b>  | <b>12.6</b> |
| <b>Philippines</b>    | <b>126,965</b>   | <b>348</b>    | <b>105.4</b>  | <b>241</b> | <b>1,946</b> | <b>558</b> | <b>2,746</b> | <b>82.4</b> | <b>23.6</b> |
| <b>Russia Region</b>  | <b>59,101</b>    | <b>2,236</b>  | <b>69.8</b>   | <b>314</b> | <b>269</b>   | <b>558</b> | <b>1,142</b> | <b>8.7</b>  | <b>18.1</b> |
| Georgia               | 4,111            | 21            | 108.3         | 375        | 1,519        | 558        | 2,452        | 41.3        | 15.2        |
| Russia                | 54,990           | 2,215         | 69.4          | 314        | 258          | 558        | 1,130        | 8.4         | 18.1        |
| <b>South America</b>  | <b>110,082</b>   | <b>2,080</b>  | <b>181.7</b>  | <b>388</b> | <b>360</b>   | <b>558</b> | <b>1,306</b> | <b>7.8</b>  | <b>12.2</b> |
| Argentina             | 12,153           | 355           | 116.1         | 301        | 277          | 558        | 1,136        | 7.8         | 15.7        |
| Bolivia               | 5,510            | 44            | 99.5          | 310        | 521          | 558        | 1,390        | 14.2        | 15.2        |
| Brazil                | 49,639           | 886           | 247.9         | 493        | 398          | 558        | 1,450        | 6.8         | 9.6         |
| Chile                 | 4,119            | 174           | 163.3         | 287        | 222          | 558        | 1,067        | 6.5         | 16.4        |
| Colombia              | 11,703           | 154           | 147.9         | 338        | 473          | 558        | 1,369        | 11.8        | 13.9        |
| Curacao               | 9                | 11            | 111.4         | 367        | 7            | 558        | 932          | 0.2         | 12.8        |
| Ecuador               | 2,873            | 72            | 116.0         | 286        | 222          | 558        | 1,066        | 6.5         | 16.5        |
| Paraguay              | 2,511            | 15            | 313.7         | 632        | 822          | 558        | 2,012        | 11.0        | 7.5         |
| Peru                  | 13,130           | 100           | 153.6         | 350        | 768          | 558        | 1,677        | 18.5        | 13.5        |
| Suriname              | 225              | 4             | 109.3         | 242        | 425          | 557        | 1,224        | 14.8        | 19.4        |
| Trinidad/Tobago       | 271              | 58            | 68.6          | 195        | 44           | 558        | 798          | 1.9         | 24.2        |
| Uruguay               | 675              | 12            | 359.2         | 630        | 448          | 558        | 1,636        | 6.0         | 7.5         |
| Venezuela             | 7,264            | 196           | 119.4         | 297        | 254          | 558        | 1,110        | 7.2         | 15.9        |
| <b>Southeast Asia</b> | <b>316,266</b>   | <b>3,666</b>  | <b>166.2</b>  | <b>323</b> | <b>528</b>   | <b>558</b> | <b>1,409</b> | <b>17.0</b> | <b>18.0</b> |
| Brunei                | 36               | 16            | 98.6          | 293        | 33           | 558        | 884          | 1.2         | 19.7        |
| Cambodia              | 12,111           | 38            | 187.6         | 412        | 1,060        | 558        | 2,030        | 26.7        | 14.1        |
| Indonesia             | 155,525          | 1,445         | 138.2         | 267        | 718          | 558        | 1,543        | 28.0        | 21.7        |
| Lao PDR               | 6,920            | 16            | 188.1         | 438        | 2,018        | 558        | 3,015        | 47.8        | 13.2        |
| Malaysia              | 9,353            | 575           | 148.1         | 267        | 166          | 558        | 992          | 6.5         | 21.7        |
| Myanmar               | 50,469           | 112           | 145.9         | 365        | 1,769        | 558        | 2,692        | 50.4        | 15.9        |
| Singapore             | 2,107            | 123           | 605.8         | 1,598      | 269          | 559        | 2,426        | 1.8         | 3.6         |
| Thailand              | 35,606           | 635           | 192.0         | 369        | 456          | 558        | 1,383        | 12.8        | 15.7        |
| Vietnam               | 44,139           | 705           | 141.7         | 205        | 297          | 558        | 1,060        | 15.0        | 28.3        |
| <b>South Korea</b>    | <b>8,980</b>     | <b>944</b>    | <b>176.5</b>  | <b>298</b> | <b>111</b>   | <b>558</b> | <b>967</b>   | <b>3.9</b>  | <b>19.7</b> |
| <b>Taiwan</b>         | <b>6,649</b>     | <b>639</b>    | <b>146.6</b>  | <b>240</b> | <b>134</b>   | <b>558</b> | <b>933</b>   | <b>5.9</b>  | <b>24.6</b> |
| <b>United States</b>  | <b>62,694</b>    | <b>6,057</b>  | <b>122.6</b>  | <b>361</b> | <b>137</b>   | <b>558</b> | <b>1,057</b> | <b>4.0</b>  | <b>16.1</b> |
| <b>All regions</b>    | <b>5,292,576</b> | <b>56,873</b> | <b>116.79</b> | <b>313</b> | <b>591</b>   | <b>558</b> | <b>1,462</b> | <b>18.8</b> | <b>17.8</b> |

<sup>1</sup>2050 country BAU mortalities due to air pollution are extrapolated from 2016 values from WHO (2017) using the method described in Jacobson et al. (2019).

<sup>2</sup>CO<sub>2</sub>e=CO<sub>2</sub>-equivalent emissions. This accounts for the emissions of CO<sub>2</sub> plus the emissions of other greenhouse gases multiplied by their global warming potentials. The emissions from these 145 countries represent 99.7% of all world anthropogenic CO<sub>2</sub>e emissions.

<sup>3</sup>Calculated as the WWS private energy and total social cost from Table S20, Column (g) divided by the CO<sub>2</sub>e emissions from Column (b) of the present table.

<sup>4</sup>Columns (d)-(g) are calculated as the BAU private energy, health, climate, and total social costs from Table S20, Columns (h)-(k), respectively, each divided by the CO<sub>2</sub>e emissions from Column (b) of the present table.

<sup>5</sup>Columns (h)-(i) are calculated as the BAU health and climate costs from Table S20, Columns (i)-(j), respectively, each divided by the BAU end-use load from Table S20, Column (a) and by 8,760 hours per year.

**Table S22.** Footprint and spacing areas per MW of nameplate capacity and installed power densities for WWS electricity or heat generation technologies.

| WWS technology           | Footprint<br>(m <sup>2</sup> /MW) | Spacing<br>(km <sup>2</sup> /MW) | Installed<br>power<br>density<br>(MW/km <sup>2</sup> ) |
|--------------------------|-----------------------------------|----------------------------------|--------------------------------------------------------|
| Onshore wind             | 3.22                              | 0.0505                           | 19.8                                                   |
| Offshore wind            | 3.22                              | 0.139                            | 7.2                                                    |
| Wave device              | 700                               | 0.033                            | 30.3                                                   |
| Geothermal plant         | 3,290                             | 0                                | 304                                                    |
| Hydropower plant         | 502,380                           | 0                                | 2.0                                                    |
| Tidal turbine            | 290                               | 0.004                            | 250                                                    |
| Residential roof PV      | 5,230                             | 0                                | 191.2                                                  |
| Commercial/govt. roof PV | 5,230                             | 0                                | 191.2                                                  |
| Solar PV plant           | 12,220                            | 0                                | 81.8                                                   |
| Utility CSP plant        | 29,350                            | 0                                | 34.1                                                   |
| Solar thermal for heat   | 1,430                             | 0                                | 700                                                    |

From Jacobson et al. (2019). Spacing areas for onshore and offshore wind are based on data from Enevoldsen and Jacobson (2021). The installed power density is the inverse of the spacing except, if spacing is zero, it is the inverse of the footprint.

**Table S23.** Footprint areas for *new* utility PV farms, CSP plants, solar thermal plants for heat, geothermal plants for electricity and heat, and hydropower plants and spacing areas for new onshore wind turbines, for each country within each grid region and for the grid region as a whole.

| Region or country      | Region or country land area (km <sup>2</sup> ) | Footprint area (km <sup>2</sup> ) | Spacing area (km <sup>2</sup> ) | Footprint area as percentage of the region land area (%) | Spacing area as a percentage of the region land area (%) |
|------------------------|------------------------------------------------|-----------------------------------|---------------------------------|----------------------------------------------------------|----------------------------------------------------------|
| <b>Africa</b>          | <b>23,016,180</b>                              | <b>7,456</b>                      | <b>24,414</b>                   | <b>0.03</b>                                              | <b>0.11</b>                                              |
| Algeria                | 2,381,740                                      | 797                               | 1,692                           | 0.03                                                     | 0.07                                                     |
| Angola                 | 1,246,700                                      | 41                                | 996                             | 0.00                                                     | 0.08                                                     |
| Benin                  | 112,760                                        | 50                                | 292                             | 0.04                                                     | 0.26                                                     |
| Botswana               | 566,730                                        | 37                                | 127                             | 0.01                                                     | 0.02                                                     |
| Cameroon               | 472,710                                        | 67                                | 636                             | 0.01                                                     | 0.13                                                     |
| Congo                  | 341,500                                        | 14                                | 229                             | 0.00                                                     | 0.07                                                     |
| Congo, DR              | 2,267,050                                      | 148                               | 1,305                           | 0.01                                                     | 0.06                                                     |
| Côte d'Ivoire          | 318,000                                        | 49                                | 755                             | 0.02                                                     | 0.24                                                     |
| Egypt                  | 995,450                                        | 844                               | 3,086                           | 0.08                                                     | 0.31                                                     |
| Equator. Guinea        | 28,050                                         | 139                               | 68                              | 0.50                                                     | 0.24                                                     |
| Eritrea                | 101,000                                        | 3                                 | 16                              | 0.00                                                     | 0.02                                                     |
| Ethiopia               | 1,000,000                                      | 303                               | 979                             | 0.03                                                     | 0.10                                                     |
| Gabon                  | 257,670                                        | 109                               | 654                             | 0.04                                                     | 0.25                                                     |
| Ghana                  | 227,540                                        | 121                               | 600                             | 0.05                                                     | 0.26                                                     |
| Kenya                  | 569,140                                        | 87                                | 860                             | 0.02                                                     | 0.15                                                     |
| Libya                  | 1,759,540                                      | 180                               | 650                             | 0.01                                                     | 0.04                                                     |
| Morocco                | 446,300                                        | 195                               | 650                             | 0.04                                                     | 0.15                                                     |
| Mozambique             | 786,380                                        | 38                                | 402                             | 0.00                                                     | 0.05                                                     |
| Namibia                | 823,290                                        | 20                                | 146                             | 0.00                                                     | 0.02                                                     |
| Niger                  | 1,266,700                                      | 39                                | 106                             | 0.00                                                     | 0.01                                                     |
| Nigeria                | 910,770                                        | 2,034                             | 2,277                           | 0.22                                                     | 0.25                                                     |
| Senegal                | 192,530                                        | 27                                | 160                             | 0.01                                                     | 0.08                                                     |
| South Africa           | 1,213,090                                      | 1,345                             | 4,355                           | 0.11                                                     | 0.36                                                     |
| South Sudan            | 619,745                                        | 8                                 | 17                              | 0.00                                                     | 0.00                                                     |
| Sudan                  | 1,886,000                                      | 123                               | 485                             | 0.01                                                     | 0.03                                                     |
| Tanzania               | 885,800                                        | 130                               | 862                             | 0.01                                                     | 0.10                                                     |
| Togo                   | 54,390                                         | 21                                | 143                             | 0.04                                                     | 0.26                                                     |
| Tunisia                | 155,360                                        | 217                               | 357                             | 0.14                                                     | 0.23                                                     |
| Zambia                 | 743,398                                        | 152                               | 1,030                           | 0.02                                                     | 0.14                                                     |
| Zimbabwe               | 386,847                                        | 116                               | 479                             | 0.03                                                     | 0.12                                                     |
| <b>Australia</b>       | <b>7,682,300</b>                               | <b>3,164</b>                      | <b>3,578</b>                    | <b>0.04</b>                                              | <b>0.05</b>                                              |
| <b>Canada</b>          | <b>9,093,510</b>                               | <b>502</b>                        | <b>8,082</b>                    | <b>0.01</b>                                              | <b>0.09</b>                                              |
| <b>Central America</b> | <b>2,429,460</b>                               | <b>3,385</b>                      | <b>21,144</b>                   | <b>0.14</b>                                              | <b>0.87</b>                                              |
| Costa Rica             | 51,060                                         | 44                                | 400                             | 0.09                                                     | 0.78                                                     |
| El Salvador            | 20,720                                         | 30                                | 290                             | 0.14                                                     | 1.40                                                     |
| Guatemala              | 107,160                                        | 81                                | 846                             | 0.08                                                     | 0.79                                                     |
| Honduras               | 111,890                                        | 63                                | 709                             | 0.06                                                     | 0.63                                                     |
| Mexico                 | 1,943,950                                      | 3,017                             | 17,061                          | 0.16                                                     | 0.88                                                     |
| Nicaragua              | 120,340                                        | 32                                | 350                             | 0.03                                                     | 0.29                                                     |
| Panama                 | 74,340                                         | 117                               | 1,488                           | 0.16                                                     | 2.00                                                     |
| <b>Central Asia</b>    | <b>4,697,670</b>                               | <b>3,147</b>                      | <b>9,667</b>                    | <b>0.07</b>                                              | <b>0.21</b>                                              |
| Kazakhstan             | 2,699,700                                      | 441                               | 2,539                           | 0.02                                                     | 0.09                                                     |
| Kyrgyz Republic        | 191,800                                        | 35                                | 198                             | 0.02                                                     | 0.10                                                     |
| Pakistan               | 770,880                                        | 2,206                             | 4,573                           | 0.29                                                     | 0.59                                                     |
| Tajikistan             | 139,960                                        | 13                                | 74                              | 0.01                                                     | 0.05                                                     |
| Turkmenistan           | 469,930                                        | 143                               | 723                             | 0.03                                                     | 0.15                                                     |
| Uzbekistan             | 425,400                                        | 309                               | 1,559                           | 0.07                                                     | 0.37                                                     |
| <b>China Region</b>    | <b>11,063,254</b>                              | <b>54,388</b>                     | <b>91,978</b>                   | <b>0.49</b>                                              | <b>0.83</b>                                              |
| China                  | 9,388,211                                      | 53,762                            | 91,108                          | 0.57                                                     | 0.97                                                     |
| Hong Kong              | 1,073                                          | 435                               | 7                               | 2.0/38.50*                                               | 0.66                                                     |
| Korea, DPR             | 120,410                                        | 96                                | 513                             | 0.08                                                     | 0.43                                                     |
| Mongolia               | 1,553,560                                      | 97                                | 350                             | 0.01                                                     | 0.02                                                     |

|                     |                  |               |               |             |             |
|---------------------|------------------|---------------|---------------|-------------|-------------|
| <b>Cuba</b>         | <b>106,440</b>   | <b>247</b>    | <b>889</b>    | <b>0.23</b> | <b>0.83</b> |
| <b>Europe</b>       | <b>5,671,860</b> | <b>12,786</b> | <b>49,967</b> | <b>0.23</b> | <b>0.88</b> |
| Albania             | 27,400           | 13            | 87            | 0.05        | 0.32        |
| Austria             | 82,409           | 311           | 1,356         | 0.38        | 1.64        |
| Belarus             | 202,910          | 411           | 867           | 0.20        | 0.43        |
| Belgium             | 30,280           | 1,286         | 397           | 4.25        | 1.31        |
| Bosnia-Herzeg.      | 51,000           | 41            | 150           | 0.08        | 0.29        |
| Bulgaria            | 108,560          | 80            | 621           | 0.07        | 0.57        |
| Croatia             | 55,960           | 161           | 130           | 0.29        | 0.23        |
| Cyprus              | 9,240            | 24            | 26            | 0.26        | 0.28        |
| Czech Rep.          | 77,230           | 508           | 1,125         | 0.66        | 1.46        |
| Denmark             | 42,430           | 144           | 572           | 0.34        | 1.35        |
| Estonia             | 42,390           | 34            | 152           | 0.08        | 0.36        |
| Finland             | 303,890          | 323           | 2,102         | 0.11        | 0.69        |
| France              | 547,561          | 1,253         | 5,431         | 0.23        | 0.99        |
| Germany             | 348,540          | 1,615         | 8,908         | 0.46        | 2.56        |
| Gibraltar           | 7                | 2             | 0.077         | 2.0/24.48*  | 1.10        |
| Greece              | 128,900          | 74            | 910           | 0.06        | 0.71        |
| Hungary             | 90,530           | 460           | 405           | 0.51        | 0.45        |
| Ireland             | 68,890           | 113           | 444           | 0.16        | 0.64        |
| Italy               | 294,140          | 717           | 5,841         | 0.24        | 1.99        |
| Kosovo              | 10,887           | 14            | 70            | 0.13        | 0.64        |
| Latvia              | 62,180           | 27            | 249           | 0.04        | 0.40        |
| Lithuania           | 62,674           | 59            | 367           | 0.09        | 0.59        |
| Luxembourg          | 2,590            | 150           | 27            | 5.81        | 1.04        |
| Macedonia           | 25,220           | 41            | 75            | 0.16        | 0.30        |
| Malta               | 320              | 44            | 7             | 2.0/11.65*  | 2.21        |
| Moldova             | 32,860           | 59            | 185           | 0.18        | 0.56        |
| Montenegro          | 13,450           | 5             | 36            | 0.04        | 0.27        |
| Netherlands         | 33,720           | 1,112         | 675           | 3.30        | 2.00        |
| Norway              | 365,268          | 76            | 276           | 0.02        | 0.08        |
| Poland              | 306,220          | 414           | 3,127         | 0.14        | 1.02        |
| Portugal            | 91,590           | 101           | 679           | 0.11        | 0.74        |
| Romania             | 230,020          | 142           | 1,232         | 0.06        | 0.54        |
| Serbia              | 87,460           | 222           | 248           | 0.25        | 0.28        |
| Slovakia            | 48,088           | 142           | 601           | 0.30        | 1.25        |
| Slovenia            | 20,140           | 31            | 301           | 0.15        | 1.50        |
| Spain               | 498,800          | 575           | 4,200         | 0.12        | 0.84        |
| Sweden              | 407,340          | 333           | 1,762         | 0.08        | 0.43        |
| Switzerland         | 39,516           | 112           | 833           | 0.28        | 2.11        |
| Ukraine             | 579,320          | 389           | 2,861         | 0.07        | 0.49        |
| United Kingdom      | 241,930          | 1,167         | 2,633         | 0.48        | 1.09        |
| <b>Haiti Region</b> | <b>75,880</b>    | <b>233</b>    | <b>249</b>    | <b>0.31</b> | <b>0.33</b> |
| Dominican Rep.      | 48,320           | 174           | 202           | 0.36        | 0.42        |
| Haiti               | 27,560           | 59            | 47            | 0.22        | 0.17        |
| <b>Iceland</b>      | <b>100,250</b>   | <b>0</b>      | <b>78</b>     | <b>0.00</b> | <b>0.08</b> |
| <b>India Region</b> | <b>3,309,420</b> | <b>28,729</b> | <b>30,921</b> | <b>0.87</b> | <b>0.93</b> |
| Bangladesh          | 130,170          | 2,168         | 270           | 1.67        | 0.21        |
| India               | 2,973,190        | 25,861        | 29,849        | 0.87        | 1.00        |
| Nepal               | 143,350          | 527           | 288           | 0.37        | 0.20        |
| Sri Lanka           | 62,710           | 173           | 514           | 0.28        | 0.82        |
| <b>Israel</b>       | <b>21,640</b>    | <b>756</b>    | <b>167</b>    | <b>3.49</b> | <b>0.77</b> |
| <b>Jamaica</b>      | <b>10,830</b>    | <b>47</b>     | <b>14</b>     | <b>0.43</b> | <b>0.13</b> |
| <b>Japan</b>        | <b>364,560</b>   | <b>4,902</b>  | <b>325</b>    | <b>1.34</b> | <b>0.09</b> |
| <b>Mauritius</b>    | <b>2,040</b>     | <b>39</b>     | <b>8</b>      | <b>1.92</b> | <b>0.37</b> |
| <b>Mideast</b>      | <b>6,327,218</b> | <b>21,440</b> | <b>35,218</b> | <b>0.34</b> | <b>0.56</b> |
| Armenia             | 28,470           | 20            | 116           | 0.07        | 0.41        |
| Azerbaijan          | 82,658           | 156           | 460           | 0.19        | 0.56        |
| Bahrain             | 760              | 462           | 11            | 2.0/58.74*  | 1.39        |
| Iran                | 1,628,550        | 3,804         | 12,161        | 0.23        | 0.75        |
| Iraq                | 434,320          | 638           | 1,989         | 0.15        | 0.46        |
| Jordan              | 88,780           | 159           | 446           | 0.18        | 0.50        |



|                       |                    |                |                |             |             |
|-----------------------|--------------------|----------------|----------------|-------------|-------------|
| Kuwait                | 17,820             | 1,252          | 67             | 7.03        | 0.38        |
| Lebanon               | 10,230             | 215            | 46             | 2.10        | 0.45        |
| Oman                  | 309,500            | 667            | 1,172          | 0.22        | 0.38        |
| Qatar                 | 11,610             | 1,634          | 44             | 2.0/12.07*  | 0.38        |
| Saudi Arabia          | 2,149,690          | 5,269          | 9,440          | 0.25        | 0.44        |
| Syria                 | 183,630            | 74             | 426            | 0.04        | 0.23        |
| Turkey                | 769,630            | 1,392          | 6,723          | 0.18        | 0.87        |
| UAE                   | 83,600             | 5,662          | 2,021          | 6.77        | 2.42        |
| Yemen                 | 527,970            | 37             | 95             | 0.01        | 0.02        |
| <b>New Zealand</b>    | <b>263,310</b>     | <b>218</b>     | <b>1,045</b>   | <b>0.08</b> | <b>0.40</b> |
| <b>Philippines</b>    | <b>298,170</b>     | <b>1,633</b>   | <b>1,186</b>   | <b>0.55</b> | <b>0.40</b> |
| <b>Russia Region</b>  | <b>16,446,360</b>  | <b>1,750</b>   | <b>24,543</b>  | <b>0.01</b> | <b>0.15</b> |
| Georgia               | 69,490             | 12             | 199            | 0.02        | 0.29        |
| Russia                | 16,376,870         | 1,738          | 24,344         | 0.01        | 0.15        |
| <b>South America</b>  | <b>17,175,466</b>  | <b>4,533</b>   | <b>57,010</b>  | <b>0.03</b> | <b>0.33</b> |
| Argentina             | 2,736,690          | 428            | 3,225          | 0.02        | 0.12        |
| Bolivia               | 1,083,300          | 74             | 470            | 0.01        | 0.04        |
| Brazil                | 8,358,140          | 2,453          | 37,116         | 0.03        | 0.44        |
| Chile                 | 743,532            | 358            | 1,513          | 0.05        | 0.20        |
| Colombia              | 1,109,500          | 279            | 4,243          | 0.03        | 0.38        |
| Curacao               | 444                | 53             | 7              | 2.0/10.0*   | 1.47        |
| Ecuador               | 248,360            | 120            | 1,550          | 0.05        | 0.62        |
| Paraguay              | 397,300            | 28             | 214            | 0.01        | 0.05        |
| Peru                  | 1,280,000          | 276            | 2,898          | 0.02        | 0.23        |
| Suriname              | 156,000            | 5              | 51             | 0.00        | 0.03        |
| Trinidad/Tobago       | 5,130              | 128            | 14             | 2.50        | 0.27        |
| Uruguay               | 175,020            | 40             | 333            | 0.02        | 0.19        |
| Venezuela             | 882,050            | 292            | 5,377          | 0.03        | 0.61        |
| <b>Southeast Asia</b> | <b>4,027,647</b>   | <b>22,030</b>  | <b>2,633</b>   | <b>0.55</b> | <b>0.07</b> |
| Brunei                | 5,270              | 68             | 3              | 1.30        | 0.05        |
| Cambodia              | 176,520            | 192            | 79             | 0.11        | 0.04        |
| Indonesia             | 1,811,570          | 5,917          | 1,975          | 0.33        | 0.11        |
| Lao PDR               | 230,800            | 0              | 0              | 0.00        | 0.00        |
| Malaysia              | 328,550            | 4,146          | 143            | 1.26        | 0.04        |
| Myanmar               | 653,290            | 352            | 291            | 0.05        | 0.04        |
| Singapore             | 687                | 619            | 1              | 2.0/88.16*  | 0.14        |
| Thailand              | 510,890            | 6,607          | 146            | 1.29        | 0.03        |
| Vietnam               | 310,070            | 4,127          | -4             | 1.33        | 0.00        |
| <b>South Korea</b>    | <b>97,350</b>      | <b>4,477</b>   | <b>31</b>      | <b>4.60</b> | <b>0.03</b> |
| <b>Taiwan</b>         | <b>36,193</b>      | <b>1,532</b>   | <b>152</b>     | <b>4.23</b> | <b>0.42</b> |
| <b>United States</b>  | <b>9,147,420</b>   | <b>28,335</b>  | <b>76,900</b>  | <b>0.31</b> | <b>0.84</b> |
| <b>All regions</b>    | <b>121,464,428</b> | <b>205,729</b> | <b>440,199</b> | <b>0.17</b> | <b>0.36</b> |

\*First number is percent land taken up by onshore utility PV; second number is percent equivalent land for offshore utility PV. Applies to Bahrain, Curacao, Gibraltar, Hong Kong, Malta, Qatar, and Singapore. If countries are unable to use so much offshore area for floating PV, other options are more rooftop PV, more offshore wind, or transmission interconnection with nearby countries.

Footprint areas are the physical land areas, water surface areas, or sea floor surface areas removed from use for any other purpose by an energy technology. Rooftop PV is not included in the footprint calculation because it does not take up new land. Conventional hydro new footprint is zero because no new dams are proposed as part of these roadmaps. Spacing areas are areas between wind turbines needed to avoid interference of the wake of one turbine with the next. Such spacing area can be used for multiple purposes, including farmland, rangeland, open space, or utility PV. Offshore wind, wave, and tidal are not included because they don't take up new land.

Table S22 gives the installed power densities applied in this table. Areas are given both as an absolute area and as a percentage of the region land area, which excludes inland or coastal water bodies. For comparison, the total area and land area of Earth are 510.1 and 144.6 million km<sup>2</sup>, respectively.

**Table S24.** Estimated mean number of long-term, full-time construction and operation jobs per MW nameplate capacity of different electric power sources and storage types in the United States. A full-time job is a job that requires 2,080 hours per year of work. The job numbers include direct, indirect, and induced jobs. These job numbers are scaled to different countries as described in the caption of Table S25.

| Electric power generator               | Construction<br>Jobs/MW or<br>Jobs/km | Operation<br>Jobs/MW or<br>Jobs/km |
|----------------------------------------|---------------------------------------|------------------------------------|
| Onshore wind electricity               | 0.24                                  | 0.37                               |
| Offshore wind electricity              | 0.31                                  | 0.63                               |
| Wave electricity                       | 0.15                                  | 0.57                               |
| Geothermal electricity                 | 0.71                                  | 0.46                               |
| Hydropower electricity                 | 0.14                                  | 0.30                               |
| Tidal electricity                      | 0.16                                  | 0.61                               |
| Residential rooftop PV                 | 0.88                                  | 0.32                               |
| Commercial/government rooftop PV       | 0.65                                  | 0.16                               |
| Utility PV electricity                 | 0.24                                  | 0.85                               |
| CSP electricity                        | 0.31                                  | 0.86                               |
| Solar thermal for heat                 | 0.71                                  | 0.85                               |
| Geothermal heat                        | 0.14                                  | 0.46                               |
| Pumped hydro storage (PHS)             | 0.77                                  | 0.3                                |
| CSP storage (CSP-PCM)                  | 0.62                                  | 0.3                                |
| Battery storage                        | 0.092                                 | 0.2                                |
| Chilled-water storage (CW-STES)        | 0.15                                  | 0.3                                |
| Ice storage (ICE)                      | 0.15                                  | 0.3                                |
| Hot water storage (HW-STES)            | 0.15                                  | 0.3                                |
| Underground heat storage (UTES)        | 0.15                                  | 0.3                                |
| Producing heat pumps for district heat | 0.15                                  | 0.3                                |
| Producing and storing hydrogen         | 0.32                                  | 0.3                                |
| AC transmission (jobs/km)              | 0.073                                 | 0.062                              |
| AC distribution (jobs/km)              | 0.033                                 | 0.028                              |
| HVDC transmission (jobs/km)            | 0.094                                 | 0.080                              |

Taken from Jacobson et al. (2019), except “producing heat pumps for district heat” values are estimated here and HVDC transmission job numbers were slightly updated. Values for solar thermal for heat and geothermal heat were taken from values for utility PV and geothermal electricity, respectively. Values for transmission were derived in Jacobson et al. (2017). Jobs for battery construction and operation were estimated low to account for economies of scale and automation of battery manufacturing. Please see Note S9 for more details.

**Table S25. Changes in the Numbers of Long-Term, Full-Time Jobs**

Estimated long-term, full-time jobs created and lost due to transitioning from BAU energy to WWS across all energy sectors in each country. The job creation accounts for new direct, indirect, and induced jobs in the electricity, heat, cold, and hydrogen generation, storage, and transmission (including HVDC transmission) industries. It also accounts for the building of heat pumps to supply district heating and cooling. However it does not account for changes in jobs in the production of electric appliances, vehicles, and machines or in increasing building energy efficiency. Construction jobs are for new WWS devices only. Operation jobs are for new and existing devices. The losses are due to eliminating jobs for mining, transporting, processing, and using fossil fuels, biofuels, and uranium. Fossil-fuel jobs due to non-energy uses of petroleum, such as lubricants, asphalt, petrochemical feedstock, and petroleum coke, are retained. For transportation sectors, the jobs lost are those due to transporting fossil fuels (e.g., through truck, train, barge, ship, or pipeline); the jobs not lost are those for transporting other goods. The table does not account for jobs lost in the manufacture of combustion appliances, including automobiles, ships, or industrial machines.

| Region or country      | (a)<br>Construction<br>jobs produced | (b)<br>Operation jobs<br>produced | (c)<br>Total jobs<br>produced<br>=a+b | (d)<br>Total jobs<br>lost | (e)<br>Net change in<br>jobs<br>=c-d |
|------------------------|--------------------------------------|-----------------------------------|---------------------------------------|---------------------------|--------------------------------------|
| <b>Africa</b>          | <b>1,898,635</b>                     | <b>1,691,945</b>                  | <b>3,590,580</b>                      | <b>4,545,041</b>          | <b>-954,461</b>                      |
| Algeria                | 159,765                              | 135,891                           | 295,656                               | 411,482                   | -115,826                             |
| Angola                 | 29,161                               | 28,443                            | 57,604                                | 249,355                   | -191,751                             |
| Benin                  | 19,443                               | 17,606                            | 37,049                                | 36,585                    | 464                                  |
| Botswana               | 8,401                                | 7,497                             | 15,898                                | 9,320                     | 6,578                                |
| Cameroon               | 23,175                               | 22,252                            | 45,427                                | 83,159                    | -37,732                              |
| Congo                  | 8,338                                | 7,972                             | 16,310                                | 65,555                    | -49,245                              |
| Congo, DR              | 54,316                               | 52,888                            | 107,204                               | 284,465                   | -177,261                             |
| Côte d'Ivoire          | 25,457                               | 24,216                            | 49,672                                | 71,857                    | -22,185                              |
| Egypt                  | 271,433                              | 228,399                           | 499,833                               | 333,282                   | 166,551                              |
| Equator. Guinea        | 22,050                               | 21,927                            | 43,977                                | 35,419                    | 8,558                                |
| Eritrea                | 1,792                                | 1,503                             | 3,296                                 | 7,991                     | -4,695                               |
| Ethiopia               | 81,883                               | 73,517                            | 155,400                               | 334,804                   | -179,404                             |
| Gabon                  | 34,258                               | 34,454                            | 68,712                                | 51,514                    | 17,198                               |
| Ghana                  | 45,616                               | 38,413                            | 84,029                                | 79,853                    | 4,176                                |
| Kenya                  | 42,339                               | 39,252                            | 81,591                                | 160,636                   | -79,045                              |
| Libya                  | 57,010                               | 47,296                            | 104,306                               | 189,406                   | -85,100                              |
| Morocco                | 70,952                               | 59,858                            | 130,810                               | 42,320                    | 88,490                               |
| Mozambique             | 21,527                               | 19,716                            | 41,243                                | 103,467                   | -62,224                              |
| Namibia                | 8,252                                | 7,240                             | 15,492                                | 26,889                    | -11,397                              |
| Niger                  | 11,472                               | 10,110                            | 21,582                                | 33,811                    | -12,229                              |
| Nigeria                | 345,505                              | 295,643                           | 641,148                               | 1,117,775                 | -476,627                             |
| Senegal                | 12,925                               | 11,113                            | 24,038                                | 23,010                    | 1,028                                |
| South Africa           | 312,147                              | 299,835                           | 611,983                               | 239,448                   | 372,535                              |
| South Sudan            | 2,417                                | 2,086                             | 4,503                                 | 26,622                    | -22,119                              |
| Sudan                  | 47,152                               | 38,716                            | 85,867                                | 130,461                   | -44,594                              |
| Tanzania               | 56,015                               | 48,474                            | 104,489                               | 155,345                   | -50,856                              |
| Togo                   | 9,114                                | 8,426                             | 17,540                                | 30,216                    | -12,676                              |
| Tunisia                | 44,366                               | 39,851                            | 84,216                                | 37,477                    | 46,739                               |
| Zambia                 | 42,392                               | 40,473                            | 82,865                                | 87,949                    | -5,084                               |
| Zimbabwe               | 29,961                               | 28,877                            | 58,839                                | 85,568                    | -26,729                              |
| <b>Australia</b>       | <b>294,709</b>                       | <b>370,042</b>                    | <b>664,751</b>                        | <b>364,616</b>            | <b>300,135</b>                       |
| <b>Canada</b>          | <b>192,875</b>                       | <b>234,612</b>                    | <b>427,488</b>                        | <b>702,683</b>            | <b>-275,195</b>                      |
| <b>Central America</b> | <b>629,663</b>                       | <b>812,400</b>                    | <b>1,442,063</b>                      | <b>559,964</b>            | <b>882,099</b>                       |
| Costa Rica             | 14,631                               | 18,821                            | 33,451                                | 11,159                    | 22,292                               |
| El Salvador            | 10,273                               | 13,958                            | 24,230                                | 8,184                     | 16,046                               |
| Guatemala              | 25,606                               | 31,525                            | 57,131                                | 50,988                    | 6,143                                |
| Honduras               | 18,944                               | 25,439                            | 44,383                                | 19,143                    | 25,240                               |
| Mexico                 | 519,612                              | 669,444                           | 1,189,056                             | 444,220                   | 744,836                              |
| Nicaragua              | 9,646                                | 12,300                            | 21,946                                | 11,855                    | 10,091                               |
| Panama                 | 30,952                               | 40,913                            | 71,865                                | 14,415                    | 57,450                               |
| <b>Central Asia</b>    | <b>627,606</b>                       | <b>646,285</b>                    | <b>1,273,891</b>                      | <b>885,570</b>            | <b>388,321</b>                       |
| Kazakhstan             | 102,521                              | 100,618                           | 203,140                               | 216,438                   | -13,298                              |

|                     |                  |                  |                   |                  |                  |
|---------------------|------------------|------------------|-------------------|------------------|------------------|
| Kyrgyz Republic     | 11,248           | 11,824           | 23,071            | 6,716            | 16,355           |
| Pakistan            | 404,109          | 423,855          | 827,965           | 411,954          | 416,011          |
| Tajikistan          | 7,747            | 8,711            | 16,458            | 6,978            | 9,480            |
| Turkmenistan        | 30,489           | 30,151           | 60,640            | 121,282          | -60,642          |
| Uzbekistan          | 71,492           | 71,125           | 142,617           | 122,202          | 20,415           |
| <b>China Region</b> | <b>5,277,627</b> | <b>6,922,939</b> | <b>12,200,567</b> | <b>3,007,406</b> | <b>9,193,161</b> |
| China               | 5,173,358        | 6,734,920        | 11,908,279        | 2,920,028        | 8,988,251        |
| Hong Kong           | 65,859           | 142,857          | 208,716           | 38,140           | 170,576          |
| Korea, DPR          | 24,092           | 29,148           | 53,240            | 27,390           | 25,850           |
| Mongolia            | 14,318           | 16,014           | 30,332            | 21,848           | 8,484            |
| <b>Cuba</b>         | <b>53,709</b>    | <b>61,549</b>    | <b>115,258</b>    | <b>20,726</b>    | <b>94,532</b>    |
| <b>Europe</b>       | <b>2,317,061</b> | <b>3,000,816</b> | <b>5,317,877</b>  | <b>2,282,091</b> | <b>3,035,786</b> |
| Albania             | 5,659            | 5,727            | 11,386            | 6,438            | 4,948            |
| Austria             | 53,094           | 63,361           | 116,455           | 45,682           | 70,773           |
| Belarus             | 39,080           | 49,120           | 88,199            | 30,240           | 57,959           |
| Belgium             | 81,793           | 135,077          | 216,870           | 50,866           | 166,004          |
| Bosnia-Herzeg.      | 11,124           | 10,647           | 21,771            | 13,999           | 7,772            |
| Bulgaria            | 28,625           | 32,387           | 61,012            | 25,502           | 35,510           |
| Croatia             | 20,084           | 21,747           | 41,831            | 18,074           | 23,757           |
| Cyprus              | 5,956            | 6,632            | 12,588            | 2,986            | 9,602            |
| Czech Rep.          | 53,171           | 66,063           | 119,233           | 45,493           | 73,740           |
| Denmark             | 24,286           | 38,795           | 63,081            | 35,572           | 27,509           |
| Estonia             | 6,423            | 8,628            | 15,051            | 11,195           | 3,856            |
| Finland             | 49,435           | 71,289           | 120,724           | 49,149           | 71,575           |
| France              | 264,003          | 300,268          | 564,271           | 205,090          | 359,181          |
| Germany             | 347,190          | 489,432          | 836,622           | 284,874          | 551,748          |
| Gibraltar           | 4,864            | 9,242            | 14,106            | 3,330            | 10,776           |
| Greece              | 36,082           | 43,398           | 79,480            | 32,296           | 47,184           |
| Hungary             | 46,876           | 55,222           | 102,097           | 31,254           | 70,843           |
| Ireland             | 21,516           | 29,085           | 50,601            | 18,569           | 32,032           |
| Italy               | 194,288          | 240,063          | 434,351           | 159,664          | 274,687          |
| Kosovo              | 4,106            | 3,819            | 7,925             | 4,670            | 3,255            |
| Latvia              | 8,655            | 9,625            | 18,280            | 13,501           | 4,779            |
| Lithuania           | 14,774           | 16,567           | 31,341            | 14,432           | 16,909           |
| Luxembourg          | 8,166            | 12,575           | 20,741            | 4,312            | 16,429           |
| Macedonia           | 7,612            | 7,491            | 15,103            | 4,087            | 11,016           |
| Malta               | 5,583            | 9,470            | 15,053            | 3,301            | 11,752           |
| Moldova             | 9,676            | 11,041           | 20,717            | 8,015            | 12,702           |
| Montenegro          | 2,365            | 2,381            | 4,745             | 2,525            | 2,220            |
| Netherlands         | 92,766           | 156,186          | 248,951           | 103,044          | 145,907          |
| Norway              | 29,099           | 42,509           | 71,608            | 215,796          | -144,188         |
| Poland              | 137,633          | 137,729          | 275,362           | 107,651          | 167,711          |
| Portugal            | 34,377           | 40,577           | 74,954            | 34,248           | 40,706           |
| Romania             | 46,219           | 51,407           | 97,626            | 60,925           | 36,701           |
| Serbia              | 31,064           | 31,391           | 62,455            | 22,114           | 40,341           |
| Slovakia            | 23,476           | 25,940           | 49,416            | 17,269           | 32,147           |
| Slovenia            | 10,764           | 11,429           | 22,193            | 9,161            | 13,032           |
| Spain               | 161,346          | 207,535          | 368,881           | 129,201          | 239,680          |
| Sweden              | 59,394           | 90,209           | 149,603           | 68,455           | 81,148           |
| Switzerland         | 33,438           | 38,398           | 71,836            | 28,505           | 43,331           |
| Ukraine             | 114,893          | 129,152          | 244,045           | 106,762          | 137,283          |
| United Kingdom      | 188,108          | 289,205          | 477,313           | 253,844          | 223,469          |
| <b>Haiti Region</b> | <b>40,725</b>    | <b>44,515</b>    | <b>85,241</b>     | <b>39,348</b>    | <b>45,893</b>    |
| Dominican Rep.      | 29,664           | 32,055           | 61,719            | 15,918           | 45,801           |
| Haiti               | 11,061           | 12,460           | 23,522            | 23,430           | 92               |
| <b>Iceland</b>      | <b>2,002</b>     | <b>5,850</b>     | <b>7,852</b>      | <b>4,635</b>     | <b>3,217</b>     |
| <b>India Region</b> | <b>3,335,303</b> | <b>3,966,804</b> | <b>7,302,107</b>  | <b>2,611,937</b> | <b>4,690,170</b> |
| Bangladesh          | 184,794          | 263,839          | 448,634           | 178,224          | 270,410          |
| India               | 3,056,842        | 3,587,266        | 6,644,107         | 2,305,949        | 4,338,158        |
| Nepal               | 50,238           | 70,633           | 120,871           | 81,596           | 39,275           |
| Sri Lanka           | 43,429           | 45,066           | 88,495            | 46,168           | 42,327           |
| <b>Israel</b>       | <b>85,281</b>    | <b>117,882</b>   | <b>203,163</b>    | <b>33,687</b>    | <b>169,476</b>   |

|                       |                   |                   |                   |                   |                   |
|-----------------------|-------------------|-------------------|-------------------|-------------------|-------------------|
| <b>Jamaica</b>        | <b>15,967</b>     | <b>12,130</b>     | <b>28,096</b>     | <b>5,617</b>      | <b>22,479</b>     |
| <b>Japan</b>          | <b>556,469</b>    | <b>630,995</b>    | <b>1,187,464</b>  | <b>260,005</b>    | <b>927,459</b>    |
| <b>Mauritius</b>      | <b>36,700</b>     | <b>18,804</b>     | <b>55,504</b>     | <b>5,543</b>      | <b>49,961</b>     |
| <b>Mideast</b>        | <b>2,086,999</b>  | <b>2,628,244</b>  | <b>4,715,243</b>  | <b>3,692,453</b>  | <b>1,022,790</b>  |
| Armenia               | 4,927             | 5,399             | 10,326            | 4,053             | 6,273             |
| Azerbaijan            | 24,127            | 24,698            | 48,825            | 85,860            | -37,035           |
| Bahrain               | 27,582            | 44,303            | 71,885            | 52,125            | 19,760            |
| Iran                  | 554,158           | 637,998           | 1,192,156         | 845,831           | 346,325           |
| Iraq                  | 95,149            | 100,248           | 195,396           | 426,300           | -230,904          |
| Jordan                | 27,078            | 31,732            | 58,810            | 16,145            | 42,665            |
| Kuwait                | 69,274            | 111,529           | 180,803           | 253,173           | -72,370           |
| Lebanon               | 22,723            | 33,932            | 56,655            | 13,161            | 43,494            |
| Oman                  | 74,597            | 97,366            | 171,963           | 157,681           | 14,282            |
| Qatar                 | 82,038            | 132,224           | 214,263           | 293,984           | -79,721           |
| Saudi Arabia          | 511,188           | 609,933           | 1,121,121         | 988,951           | 132,170           |
| Syria                 | 22,964            | 24,907            | 47,870            | 24,569            | 23,301            |
| Turkey                | 257,168           | 294,863           | 552,031           | 125,714           | 426,317           |
| UAE                   | 304,686           | 469,263           | 773,949           | 394,325           | 379,624           |
| Yemen                 | 9,341             | 9,849             | 19,190            | 10,581            | 8,609             |
| <b>New Zealand</b>    | <b>51,022</b>     | <b>64,623</b>     | <b>115,645</b>    | <b>39,965</b>     | <b>75,680</b>     |
| <b>Philippines</b>    | <b>228,355</b>    | <b>277,126</b>    | <b>505,481</b>    | <b>137,336</b>    | <b>368,145</b>    |
| <b>Russia Region</b>  | <b>409,432</b>    | <b>542,203</b>    | <b>951,635</b>    | <b>1,254,245</b>  | <b>-302,610</b>   |
| Georgia               | 5,956             | 7,415             | 13,370            | 7,855             | 5,515             |
| Russia                | 403,476           | 534,788           | 938,264           | 1,246,390         | -308,126          |
| <b>South America</b>  | <b>1,051,806</b>  | <b>1,175,991</b>  | <b>2,227,797</b>  | <b>1,965,734</b>  | <b>262,063</b>    |
| Argentina             | 93,134            | 94,131            | 187,265           | 197,295           | -10,030           |
| Bolivia               | 15,142            | 15,809            | 30,952            | 54,397            | -23,445           |
| Brazil                | 596,379           | 672,291           | 1,268,670         | 925,761           | 342,909           |
| Chile                 | 65,821            | 69,778            | 135,599           | 91,126            | 44,473            |
| Colombia              | 76,396            | 85,352            | 161,748           | 185,593           | -23,845           |
| Curacao               | 5,062             | 8,841             | 13,903            | 4,261             | 9,642             |
| Ecuador               | 28,807            | 33,169            | 61,976            | 76,516            | -14,540           |
| Paraguay              | 9,286             | 9,992             | 19,278            | 36,392            | -17,114           |
| Peru                  | 52,774            | 59,477            | 112,251           | 82,691            | 29,560            |
| Suriname              | 1,617             | 1,712             | 3,329             | 500               | 2,829             |
| Trinidad/Tobago       | 13,591            | 18,385            | 31,977            | 67,072            | -35,095           |
| Uruguay               | 11,338            | 12,732            | 24,070            | 17,292            | 6,778             |
| Venezuela             | 82,459            | 94,321            | 176,780           | 226,838           | -50,058           |
| <b>Southeast Asia</b> | <b>2,687,913</b>  | <b>2,413,052</b>  | <b>5,100,965</b>  | <b>1,987,573</b>  | <b>3,113,392</b>  |
| Brunei                | 8,137             | 7,255             | 15,392            | 33,511            | -18,119           |
| Cambodia              | 38,362            | 32,655            | 71,017            | 44,553            | 26,464            |
| Indonesia             | 840,304           | 692,706           | 1,533,010         | 761,441           | 771,569           |
| Lao PDR               | 4,841             | 5,032             | 9,873             | 29,551            | -19,678           |
| Malaysia              | 401,835           | 381,186           | 783,021           | 293,793           | 489,228           |
| Myanmar               | 69,155            | 59,102            | 128,257           | 131,930           | -3,673            |
| Singapore             | 261,074           | 129,808           | 390,882           | 97,357            | 293,525           |
| Thailand              | 574,682           | 600,938           | 1,175,620         | 365,181           | 810,439           |
| Vietnam               | 489,523           | 504,369           | 993,893           | 230,256           | 763,637           |
| <b>South Korea</b>    | <b>713,075</b>    | <b>673,222</b>    | <b>1,386,297</b>  | <b>195,903</b>    | <b>1,190,394</b>  |
| <b>Taiwan</b>         | <b>372,860</b>    | <b>446,729</b>    | <b>819,588</b>    | <b>109,361</b>    | <b>710,227</b>    |
| <b>United States</b>  | <b>2,406,342</b>  | <b>3,424,730</b>  | <b>5,831,072</b>  | <b>2,478,720</b>  | <b>3,352,352</b>  |
| <b>All regions</b>    | <b>25,372,136</b> | <b>30,183,488</b> | <b>55,555,625</b> | <b>27,190,159</b> | <b>28,365,466</b> |

Jobs for electricity generation technologies are the number of long-term, full-time jobs per MW in each country multiplied by the 2050 final nameplate capacities (Table S9) minus the 2020 nameplate capacities (Table S8) for each device for construction jobs and the 2050 nameplate capacities alone for operation jobs. The jobs per MW for each device in each country is calculated with the methodology in Jacobson et al. (2017) to scale U.S. jobs from Table S24 by year and country. For storage, the number of jobs per MW from Table S24 is multiplied by the maximum discharge rate of the storage technology for each region (Table S13). The transmission/distribution jobs are calculated as in the spreadsheet (Jacobson and Delucchi, 2021).

**Table S26.** R values from scatterplot of hourly (during the year) GATOR-GCMOM-modeled (a) heat load versus wind energy output and (b) wind energy output versus solar energy output. The plots for each value are shown in Figure S2, last row, for each region

| Region          | (a)<br>Heat load<br>vs. wind<br>power<br>output | (b)<br>Wind<br>vs. solar<br>power<br>output |
|-----------------|-------------------------------------------------|---------------------------------------------|
| Africa          | 0.35                                            | (0.33)                                      |
| Australia       | <b>0.63</b>                                     | (0.20)                                      |
| Canada          | <b>0.82</b>                                     | (0.22)                                      |
| Central America | <b>0.81</b>                                     | (0.19)                                      |
| Central Asia    | <i>0.58</i>                                     | (0.33)                                      |
| China           | <b>0.73</b>                                     | (0.18)                                      |
| Cuba            | (0.15)                                          | (0.19)                                      |
| Europe          | <b>0.81</b>                                     | (0.38)                                      |
| Haiti           | 0.08                                            | (0.17)                                      |
| Iceland         | <i>0.50</i>                                     | --                                          |
| India           | <i>0.45</i>                                     | (0.17)                                      |
| Israel          | 0.15                                            | (0.28)                                      |
| Jamaica         | 0.24                                            | (0.19)                                      |
| Japan           | <b>0.61</b>                                     | (0.22)                                      |
| Mauritius       | 0.04                                            | (0.16)                                      |
| Mideast         | <i>0.44</i>                                     | (0.33)                                      |
| New Zealand     | 0.28                                            | (0.15)                                      |
| Philippines     | (0.05)                                          | (0.14)                                      |
| Russia          | <b>0.76</b>                                     | (0.36)                                      |
| South America   | <b>0.71</b>                                     | (0.01)                                      |
| Southeast Asia  | <b>0.73</b>                                     | (0.00)                                      |
| South Korea     | <i>0.51</i>                                     | (0.10)                                      |
| Taiwan          | <b>0.71</b>                                     | (0.16)                                      |
| United States   | <b>0.73</b>                                     | (0.23)                                      |

Correlations are very strong for R=0.8-1; strong for R=0.6-0.79; moderate for R=0.4-0.59; weak for 0.2-0.39; and very weak for 0-0.19 (Evans, 1996). Very strong and strong R values are in bold; moderate values are in italics, and the rest are plain. Parentheses indicate negative correlations. All other correlations are positive. – means no solar installed for the Iceland roadmap.

## Supporting Figures

**Figure S1.** Main generation, transmission, storage, and use components of a 100% WWS system to provide energy for all purposes.

| WWS Generation                                                                                                                                                 | WWS Storage                                                                                                                                                                            | WWS Equipment                                                                                                                                                                                                                                                                                                                                     |
|----------------------------------------------------------------------------------------------------------------------------------------------------------------|----------------------------------------------------------------------------------------------------------------------------------------------------------------------------------------|---------------------------------------------------------------------------------------------------------------------------------------------------------------------------------------------------------------------------------------------------------------------------------------------------------------------------------------------------|
| <b>WWS electricity generation</b><br>Onshore/offshore wind<br>Rooftop/utility photovoltaics<br>Concentrated solar power<br>Geothermal<br>Hydro<br>Tidal & wave | <b>Electricity storage</b><br>Batteries<br>CSP storage<br>Pumped hydropower storage<br>Hydropower reservoirs<br>Flywheels<br>Compressed air<br>Gravitational storage                   | <b>Building and district air+water heating</b><br>Electric heat pumps<br><b>Building and district cooling</b><br>Electric heat pumps<br><b>Industrial heat</b><br>Arc/induction/resistance furnaces<br>Dielectric heaters<br>Electron beam heaters<br>Heat pumps/CSP steam<br><b>Hydrogen generation/compression</b><br>Electrolyzers/compressors |
| <b>WWS heat generation</b><br>Solar thermal/CSP steam<br>Geothermal heat                                                                                       | <b>District heat storage</b><br>Water tanks<br>Boreholes/water pits/aquifers                                                                                                           | <b>Transportation vehicles</b><br>Battery-electric<br>Hydrogen fuel cell                                                                                                                                                                                                                                                                          |
| <b>WWS Grid</b><br><b>Transmission/distribution (T&amp;D)</b><br>AC/HVAC/HVDC lines<br>Distribution lines<br>Grid management<br>Software<br>Demand response    | <b>District cold storage</b><br>Water tanks/ice<br>Aquifers<br><b>Building heat storage</b><br>Water tank storage<br>Thermal mass<br><b>Hydrogen storage</b><br>Hydrogen storage tanks | <b>Some appliances/machines</b><br>Induction cooktops<br>Electric leafblowers/lawnmowers<br>Heat pump dryers<br><b>Efficiency/reduce energy use</b><br>Insulate/weatherize buildings<br>LED lights/efficient appliances<br>Telecommute/improve public transit                                                                                     |

**Figure S2.** 2050-2052 hourly time series showing the matching of all-energy demand with supply and storage for the regions defined in Table S1. First row: modeled time-dependent total WWS power generation versus load plus losses plus changes in storage plus shedding for the full three-year simulation period. Second row: same as first row, but for a window of 100 days during the simulation. Third row: a breakdown of WWS power generation by source during the window. Fourth row: a breakdown of inflexible load; flexible electric, heat, and cold load; flexible hydrogen load; losses in and out of storage; transmission and distribution losses; changes in storage; and shedding. Fifth row: A breakdown of solar PV+CSP electricity production, onshore plus offshore wind electricity production, building total cold load, and building total heat load (as used in LOADMATCH), summed over each region for 10 days; Sixth row: correlation plots of building heat load versus wind power output and wind power output versus solar power output, obtained from all hourly data during the simulation. No wind versus solar plot is shown for Iceland because no solar is installed in Iceland for this study. Correlations are very strong for  $R=0.8-1$  ( $R^2=0.64-1$ ); strong for  $R=0.6-0.8$  ( $R^2=0.36-0.64$ ); moderate for  $R=0.4-0.6$  ( $R^2=0.16-0.36$ ); weak for  $0.2-0.4$  ( $R^2=0.04-0.16$ ); and very weak for  $0-0.2$  ( $R^2=0-0.04$ ) (Evans, 1996). The model was run at 30-s resolution. Results are shown hourly, so units are energy output (TWh) per hour increment, thus also in units of power (TW) averaged over the hour. No load loss occurred during any 30-s interval. Raw GATOR-GCMOM results for solar, wind, heat load, and cold load were provided and fed into LOADMATCH at 30-s time increments. LOADMATCH modified the magnitudes, but not time series, of GATOR-GCMOM results, as described in the main text.



# AFRICA

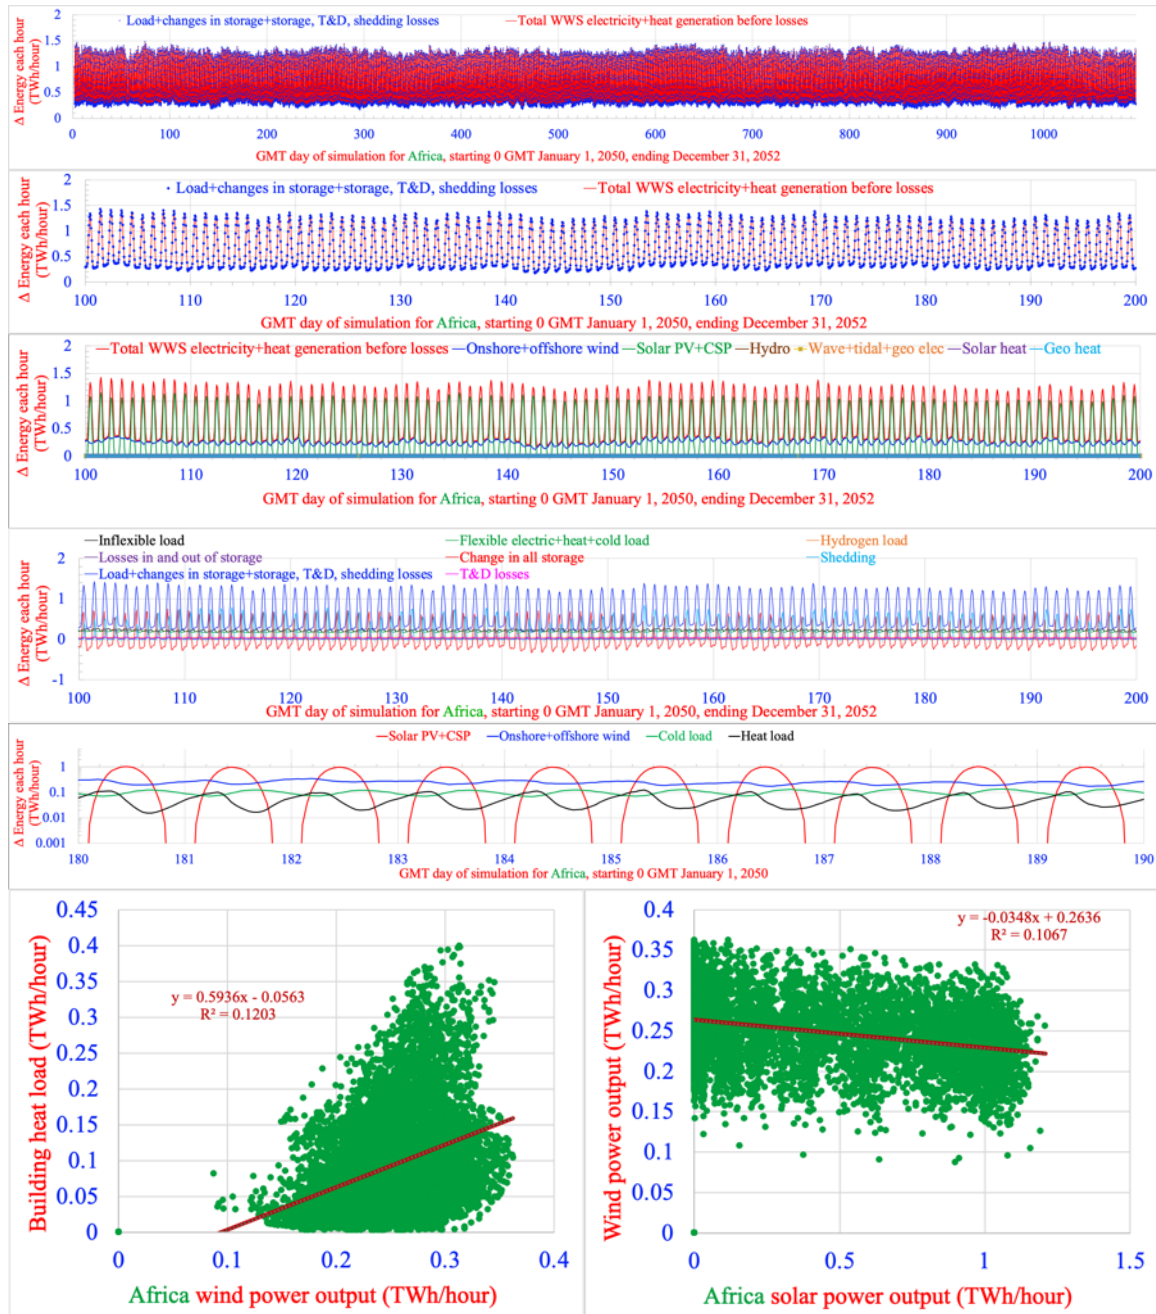

# AUSTRALIA

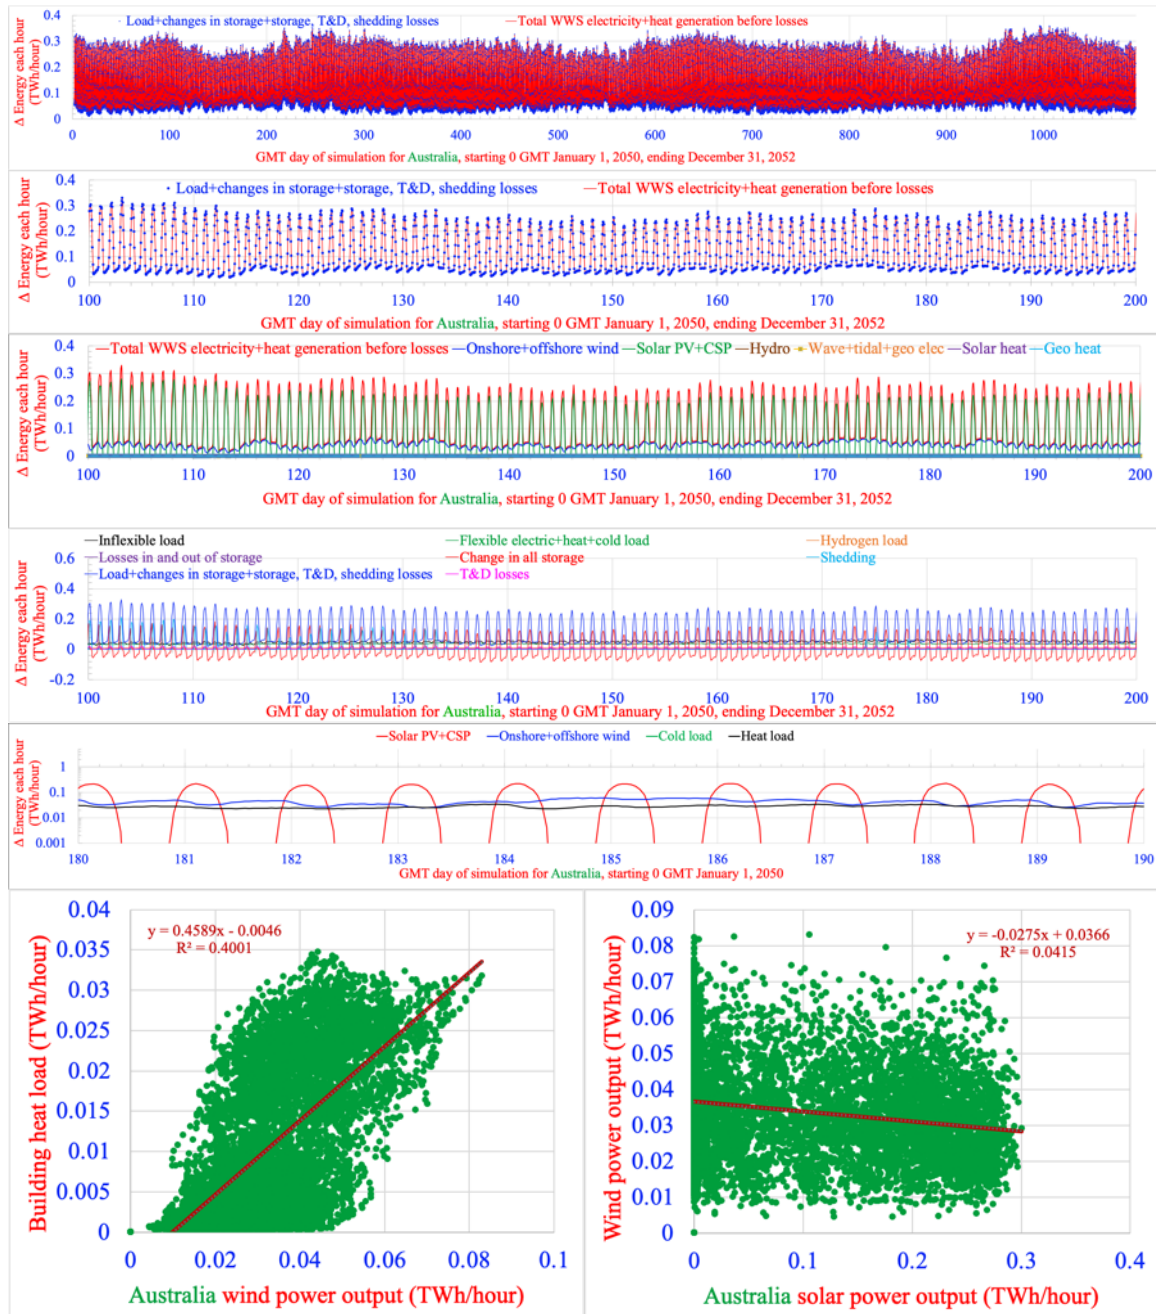

## CANADA

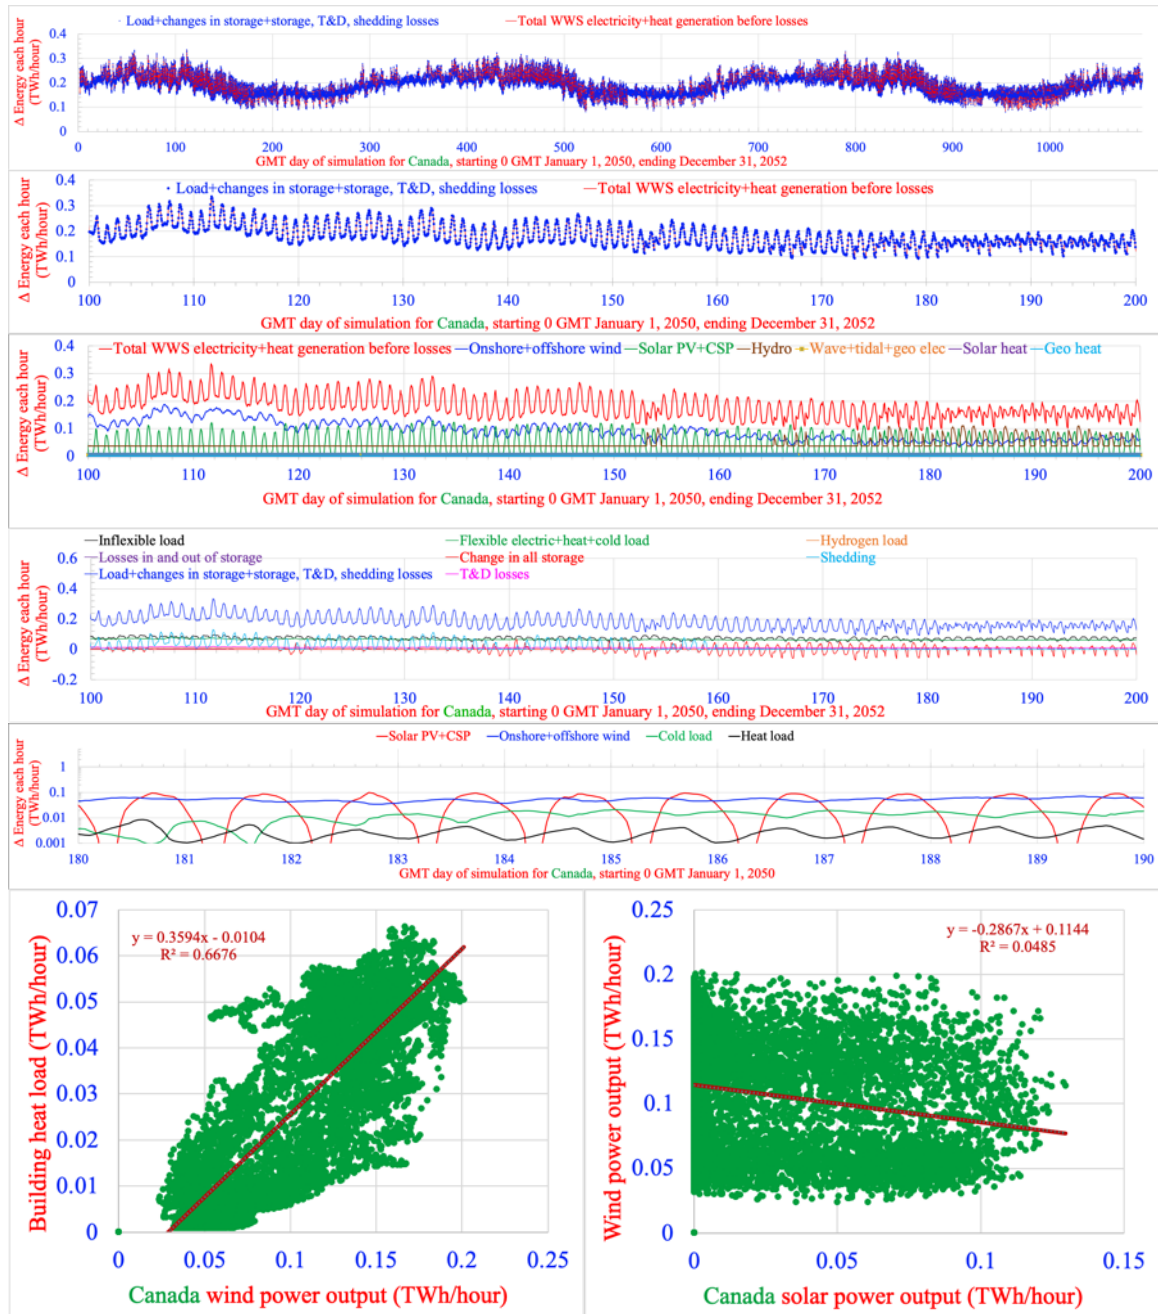



## CENTRAL AMERICA

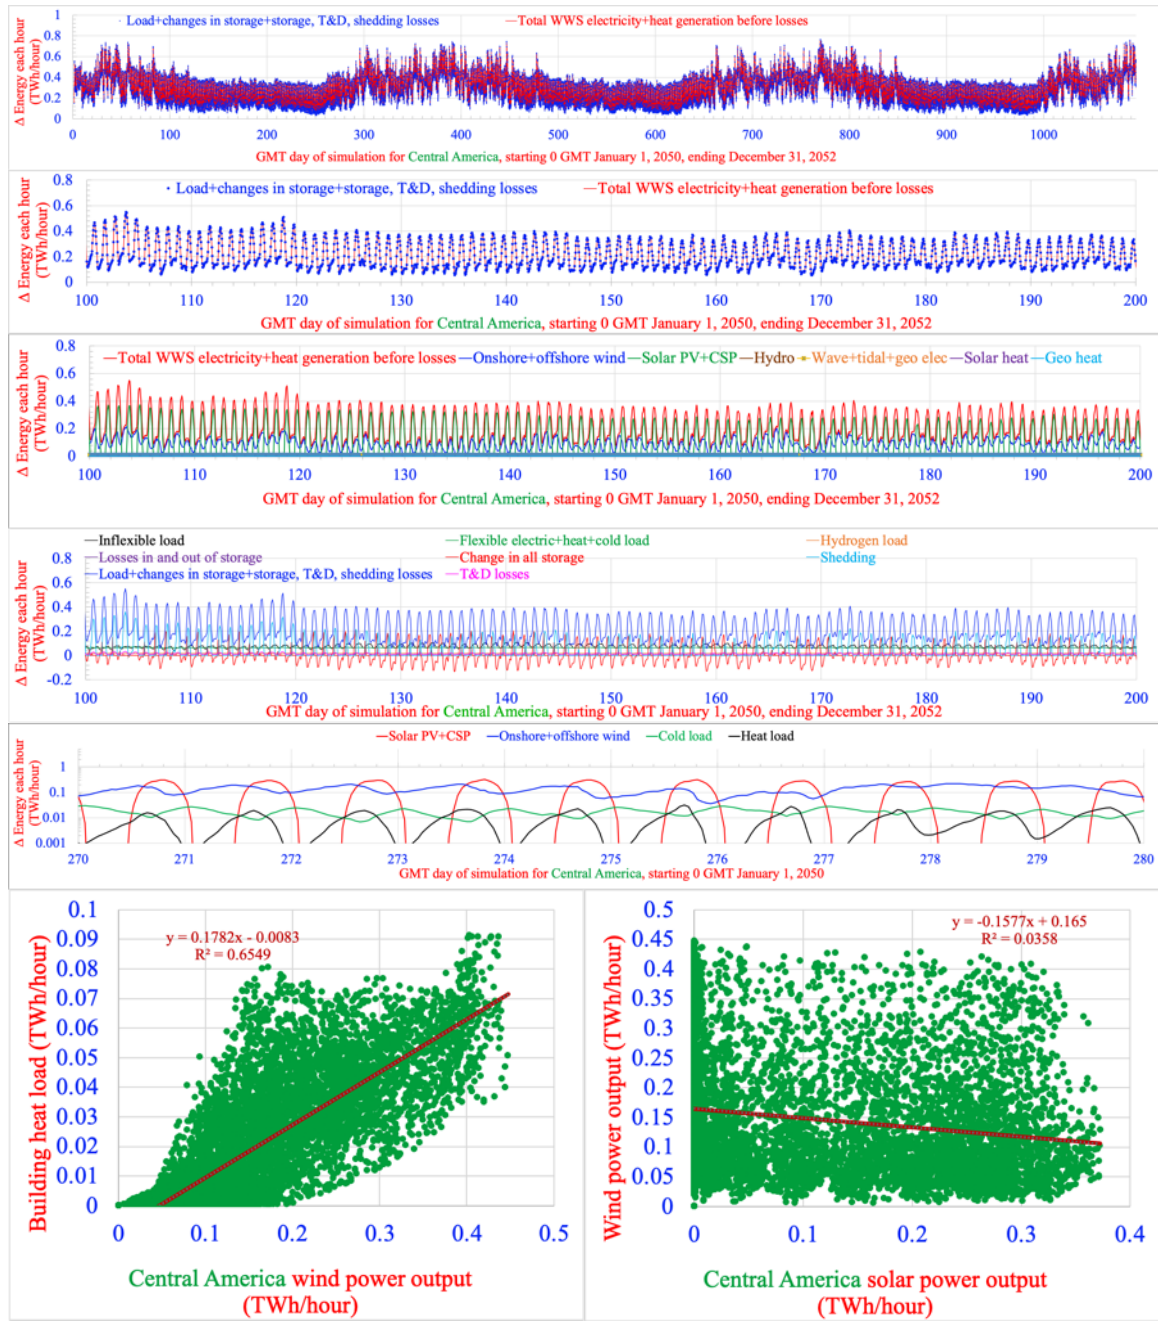

## CENTRAL ASIA

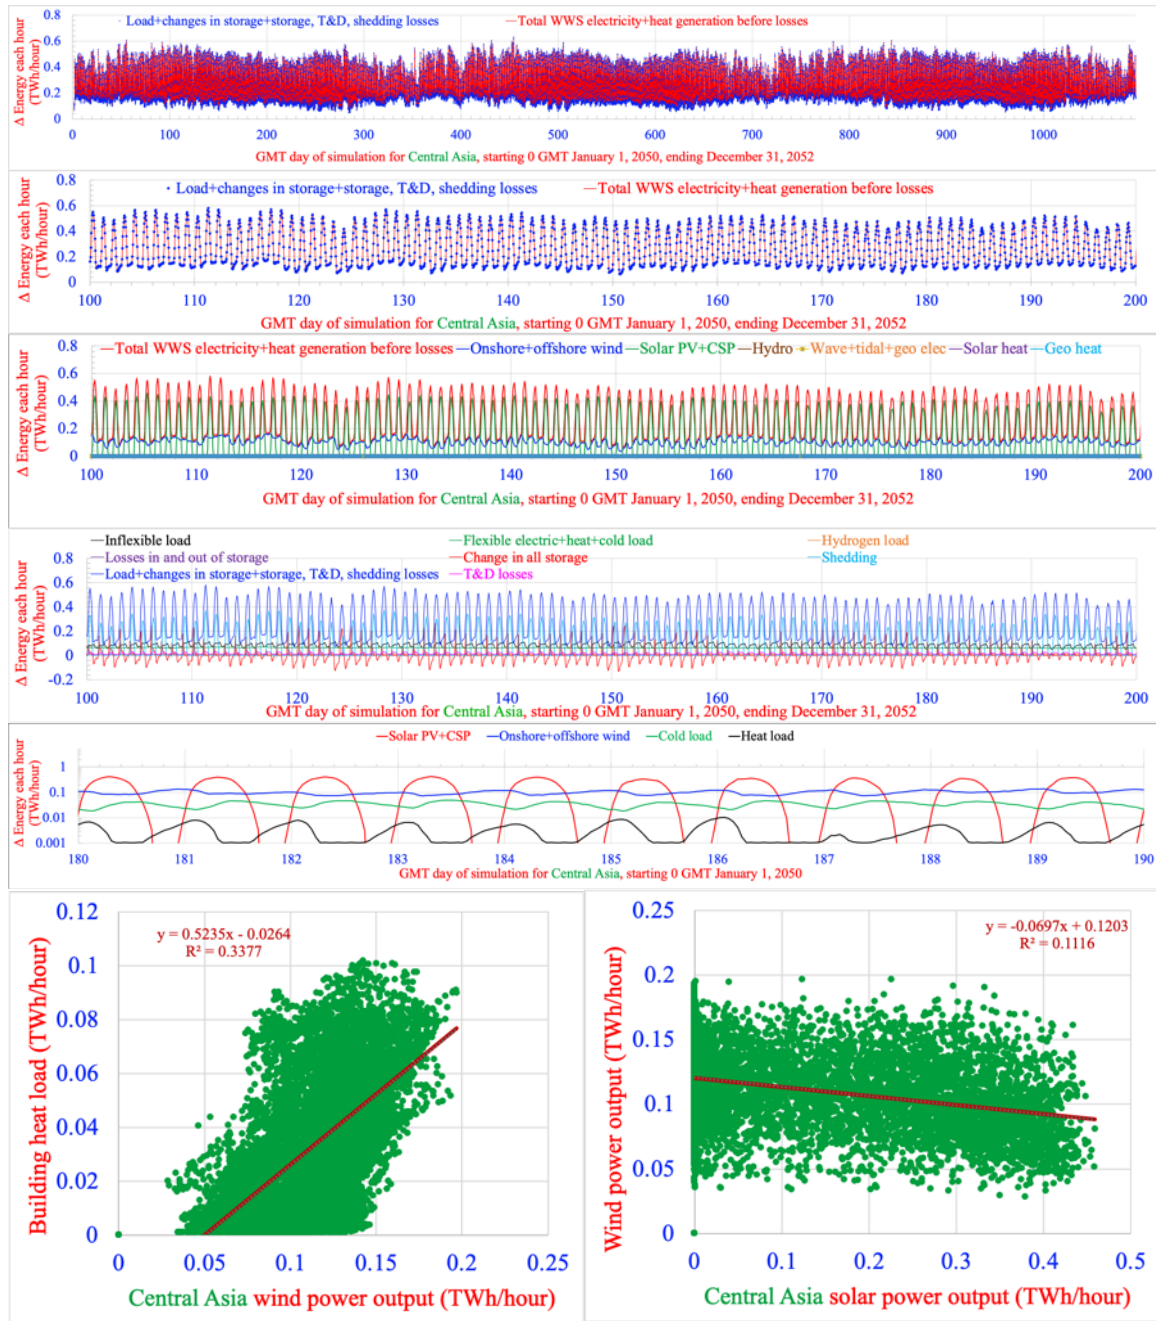

## CHINA REGION

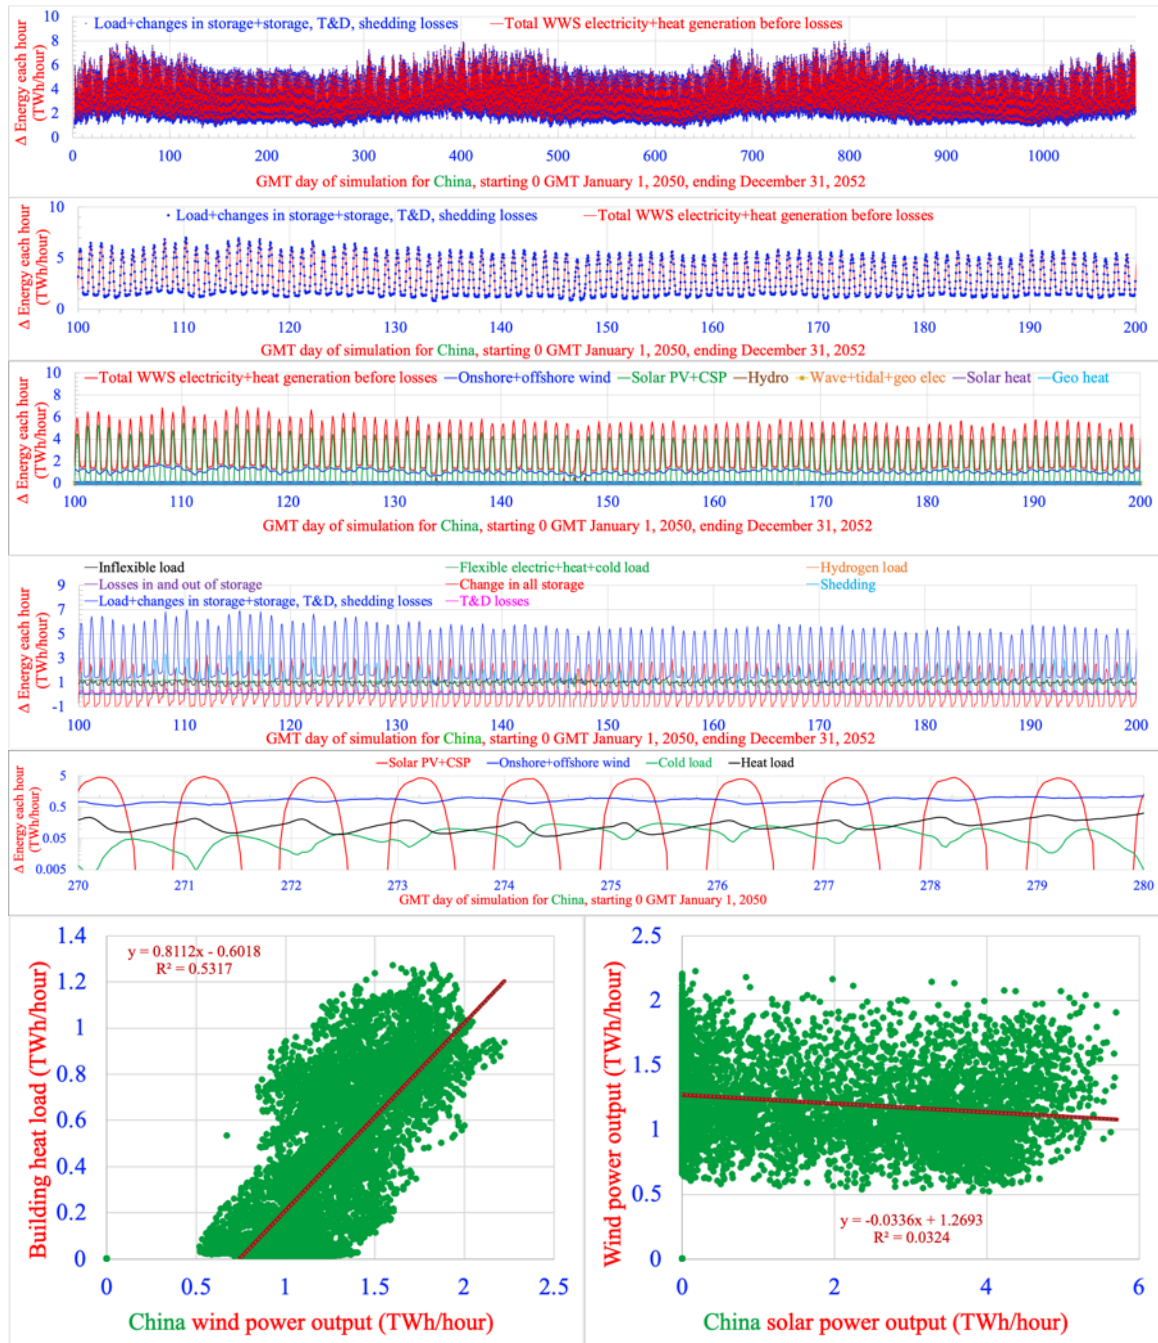



# CUBA

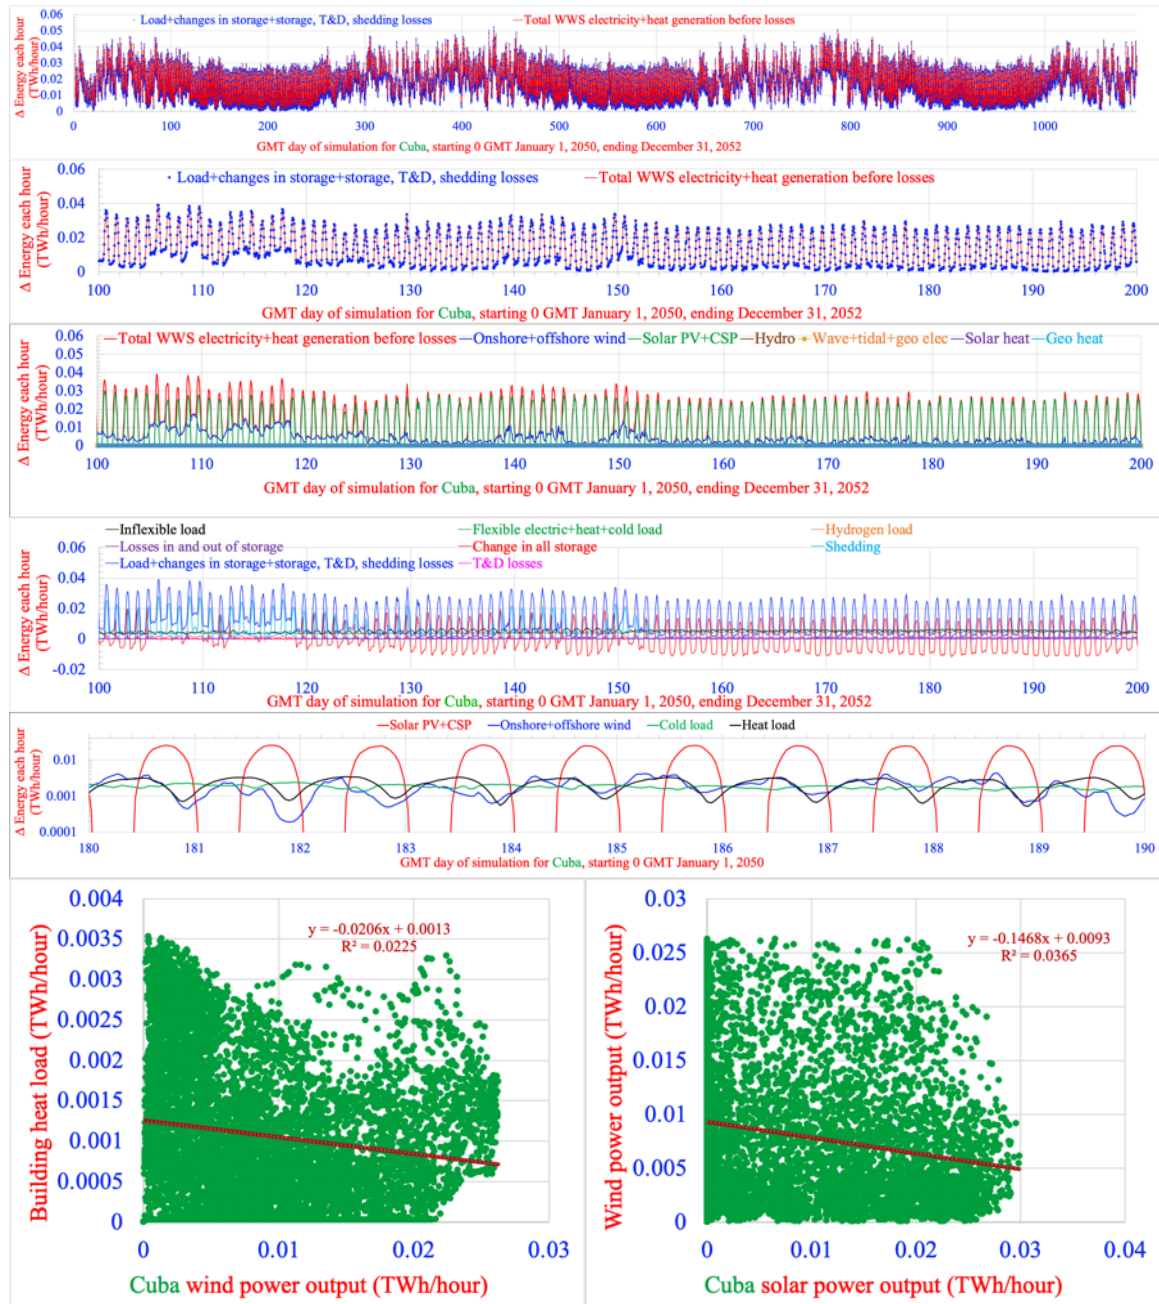

## EUROPE

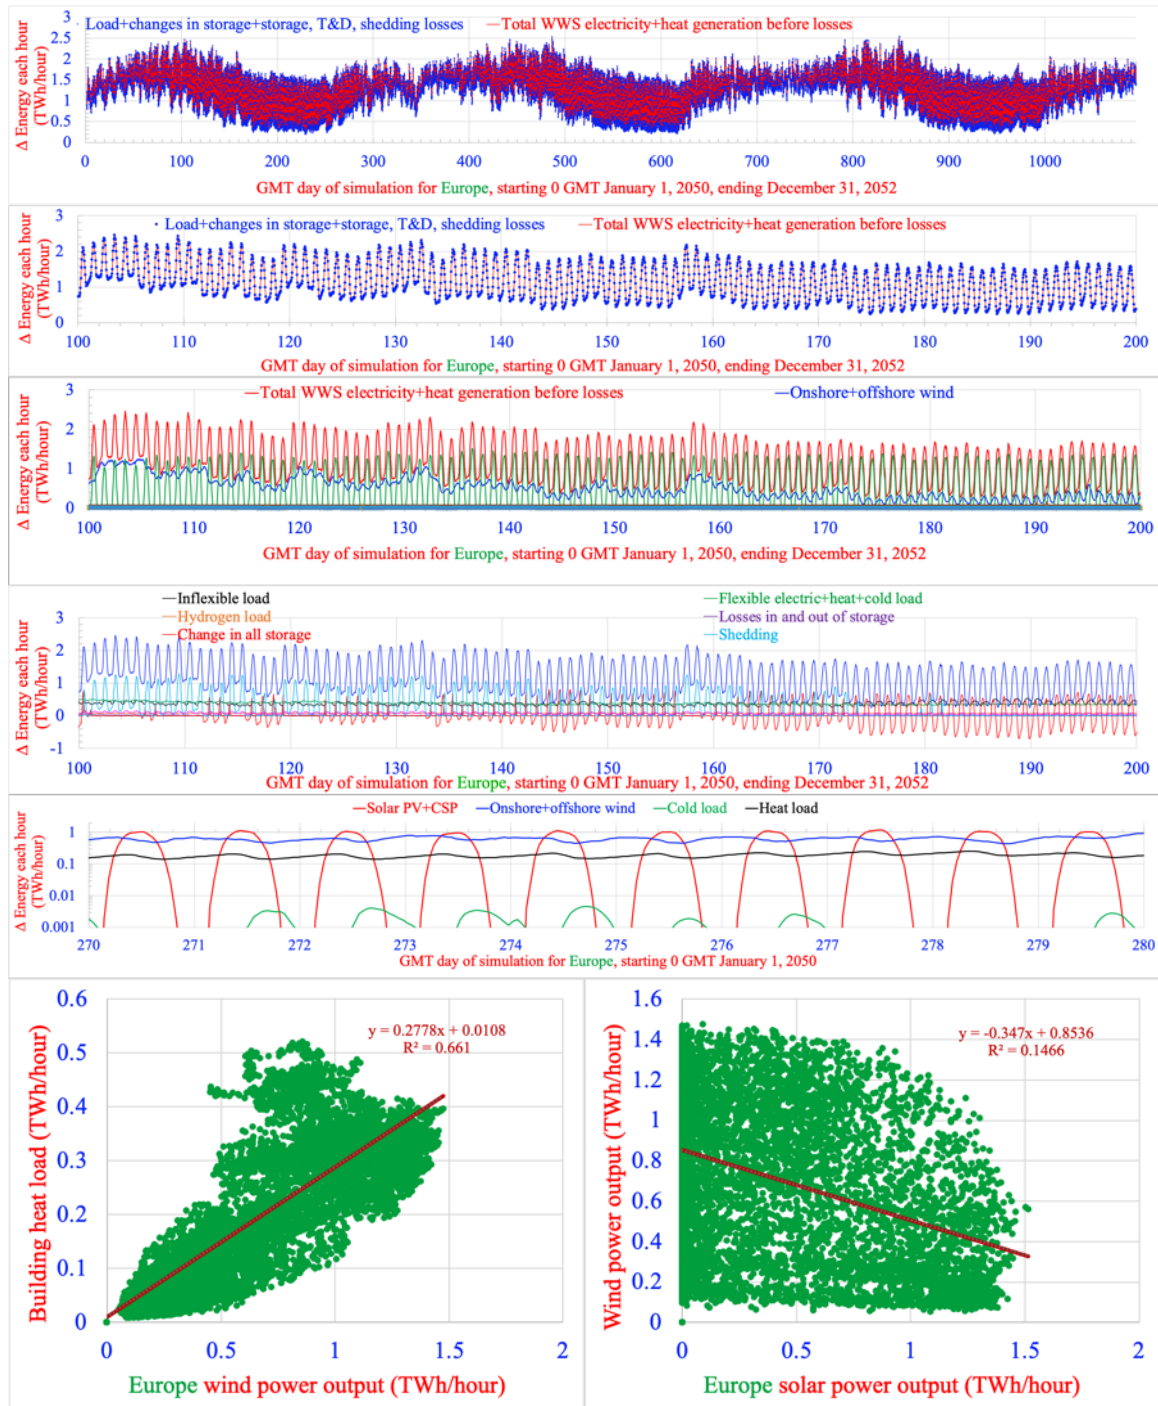



## HAITI REGION

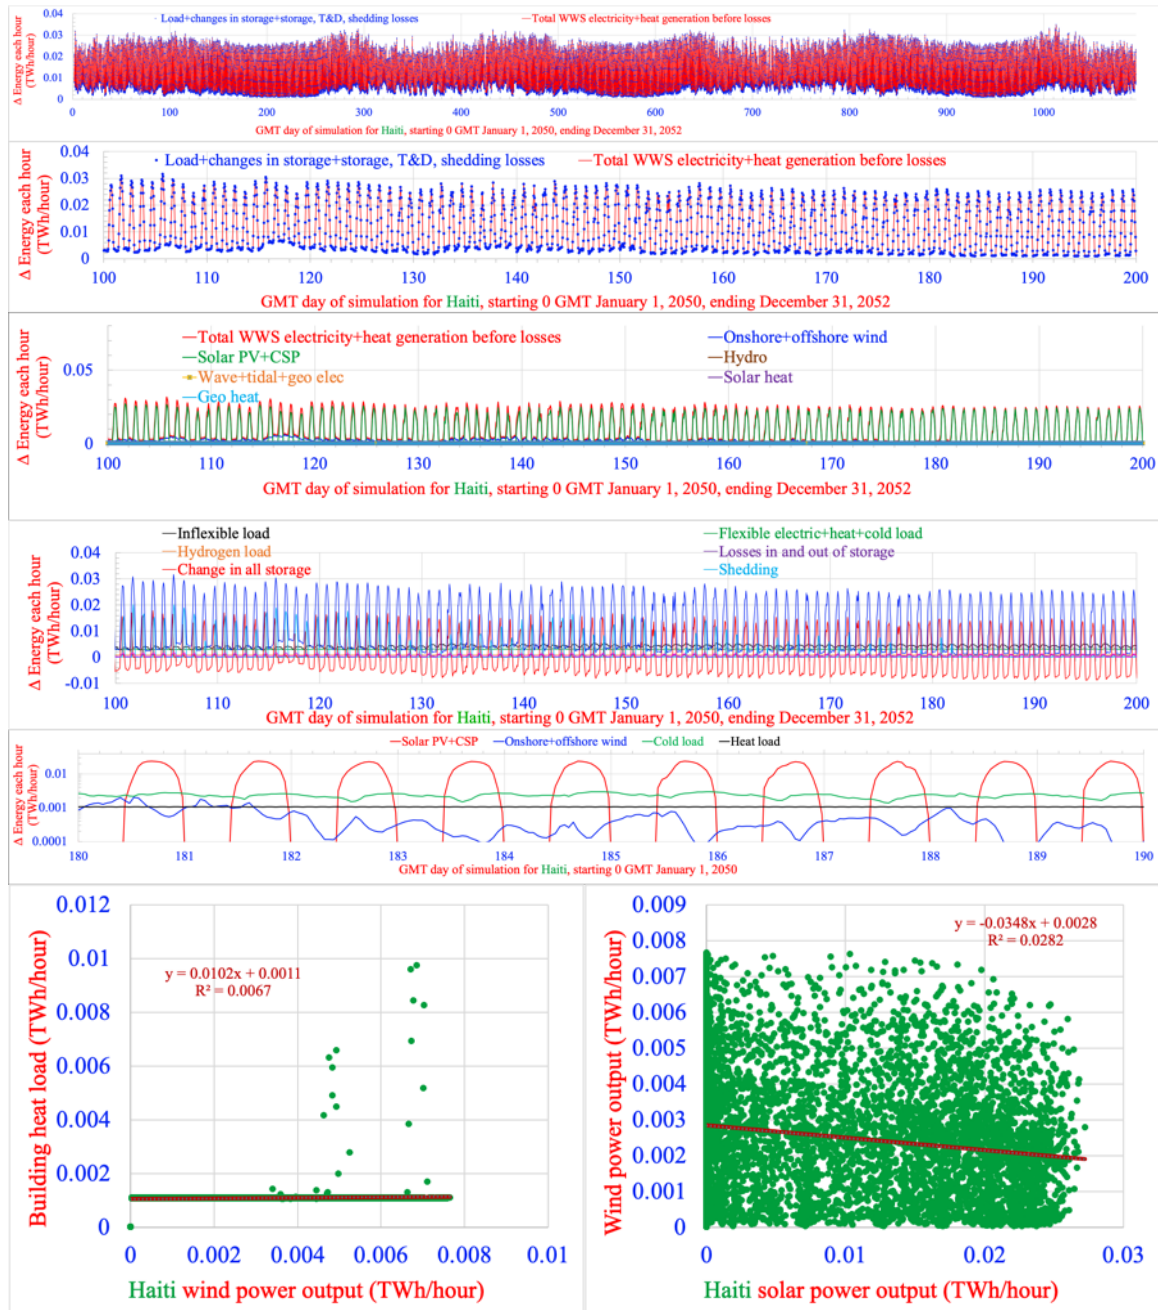

# ICELAND

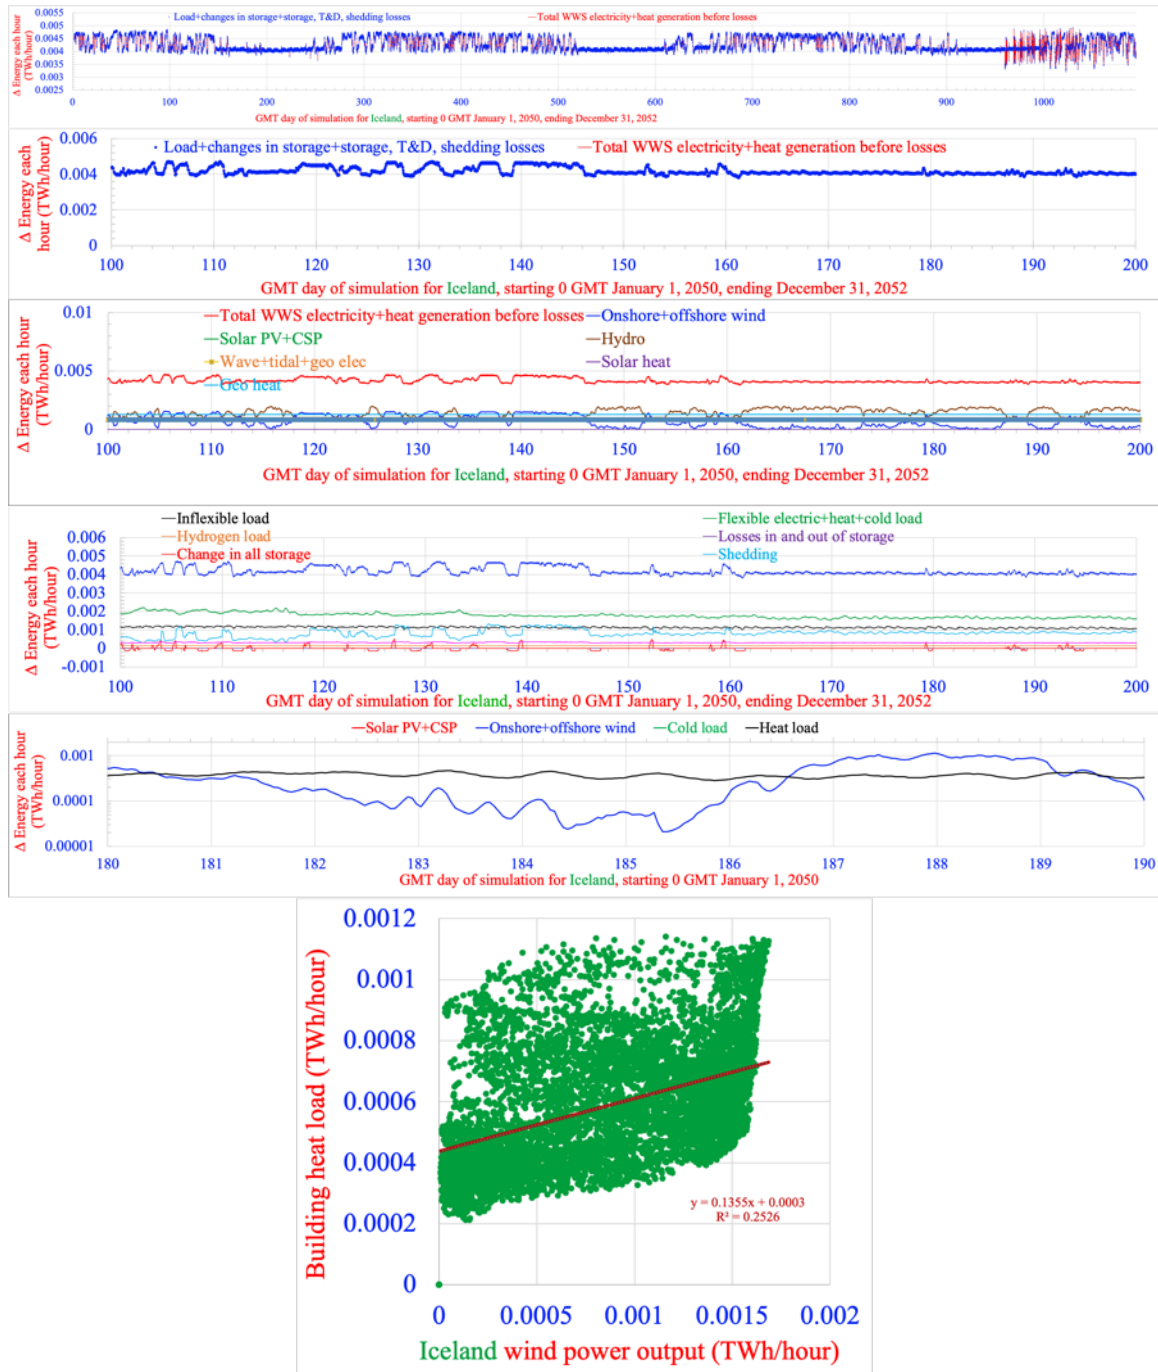

## INDIA REGION

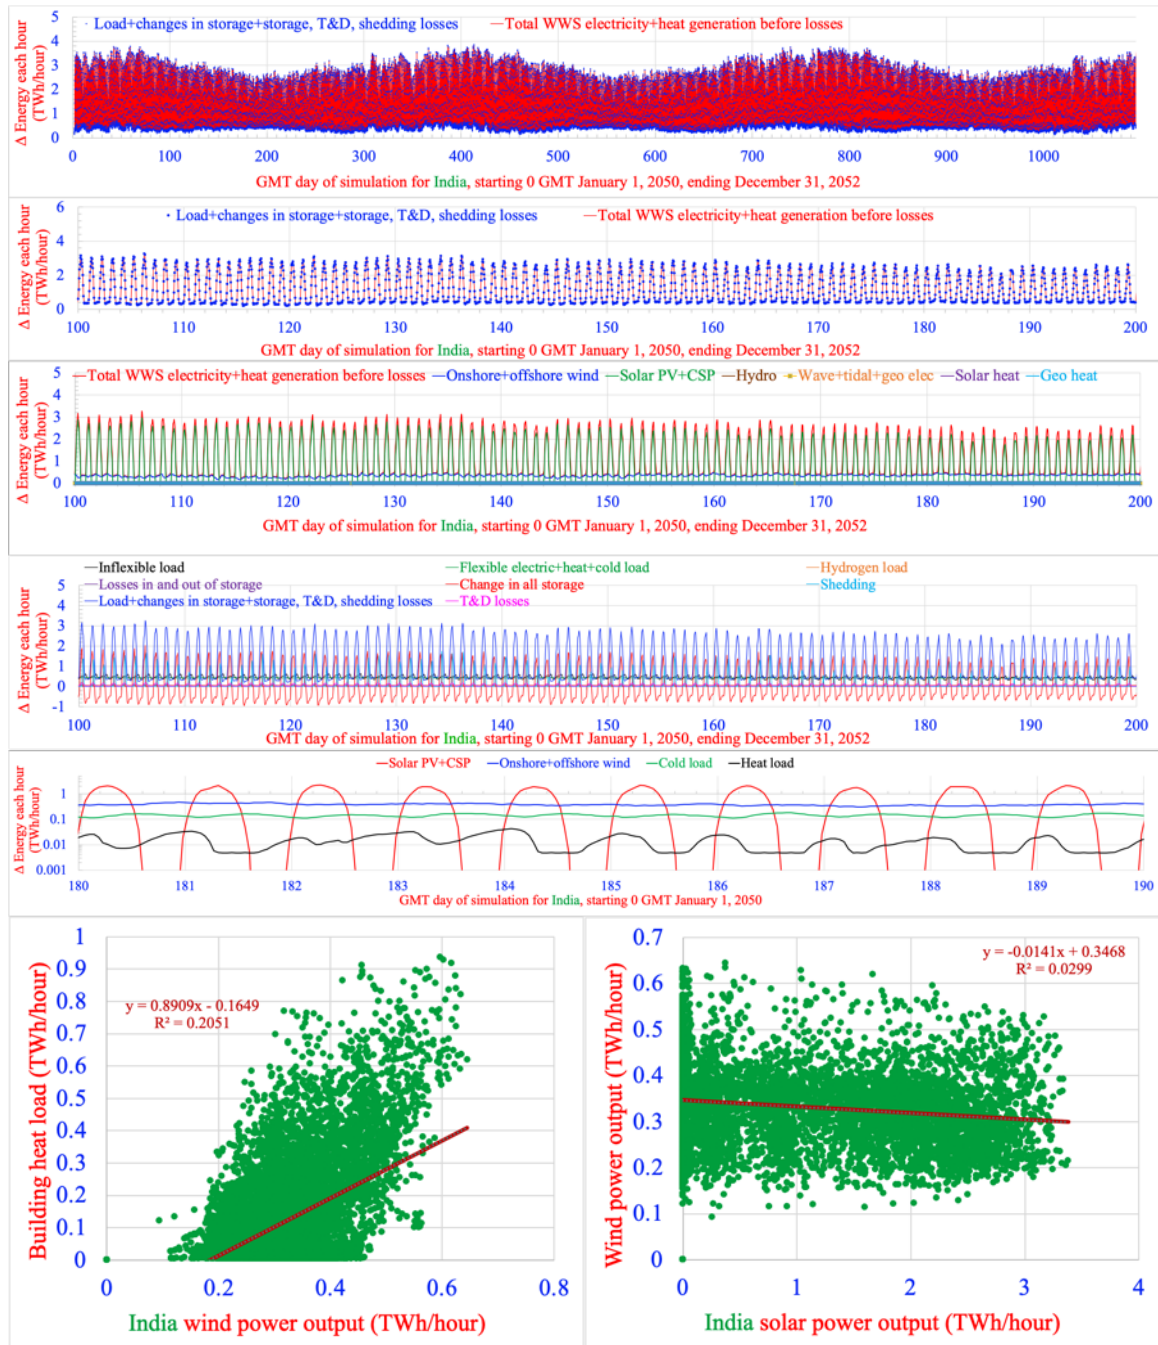

# ISRAEL

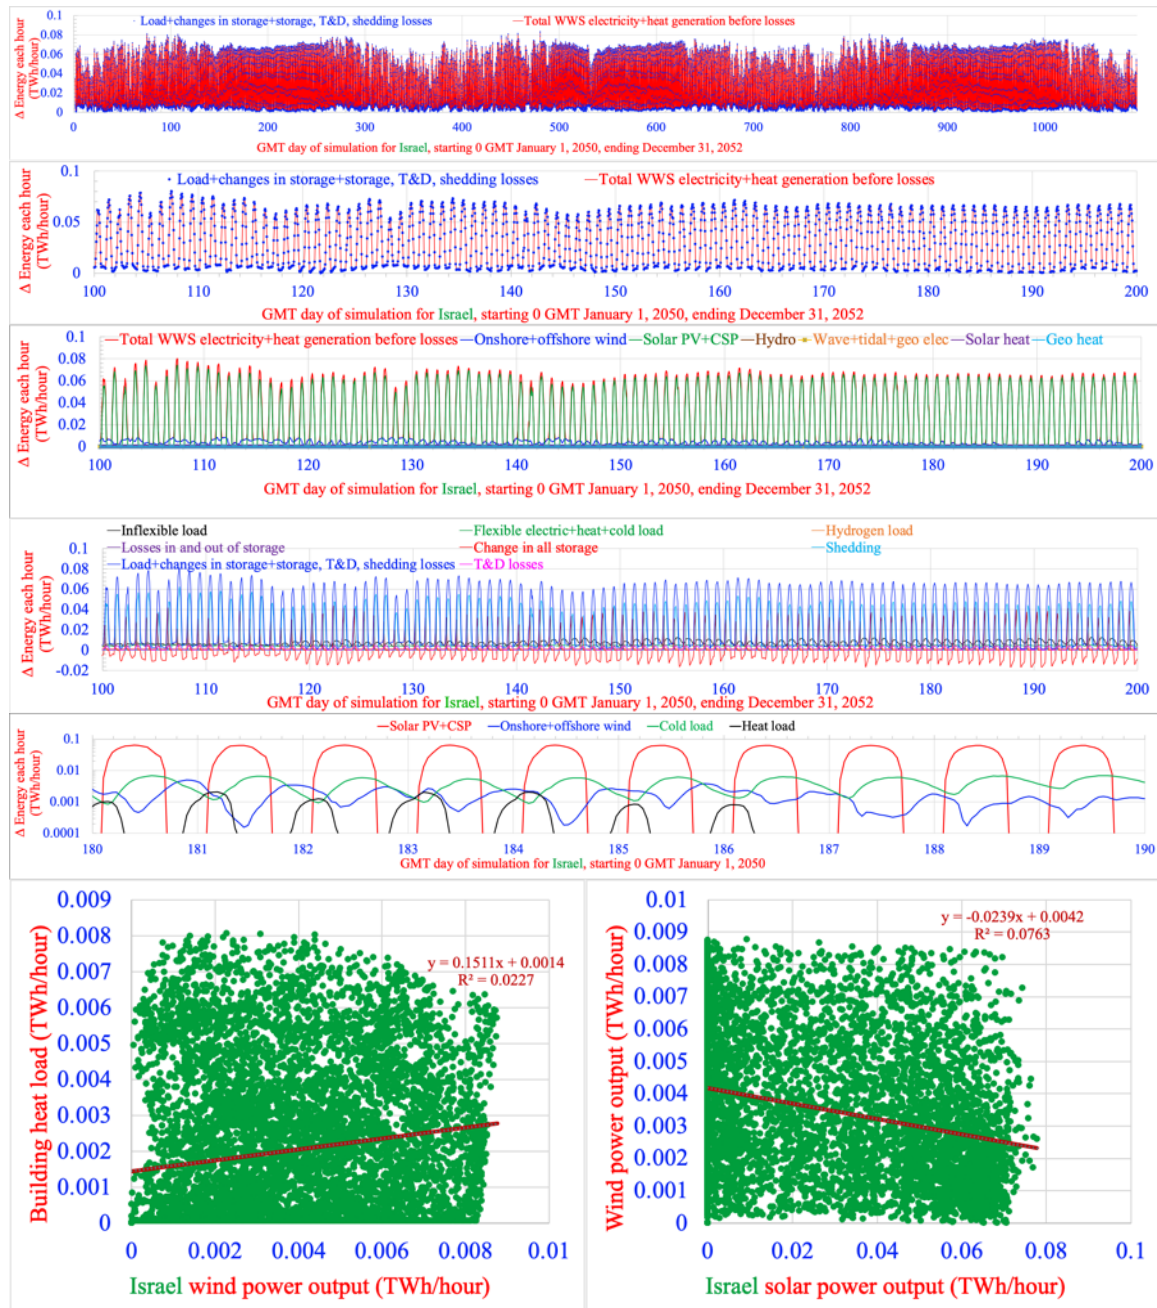



# JAMAICA

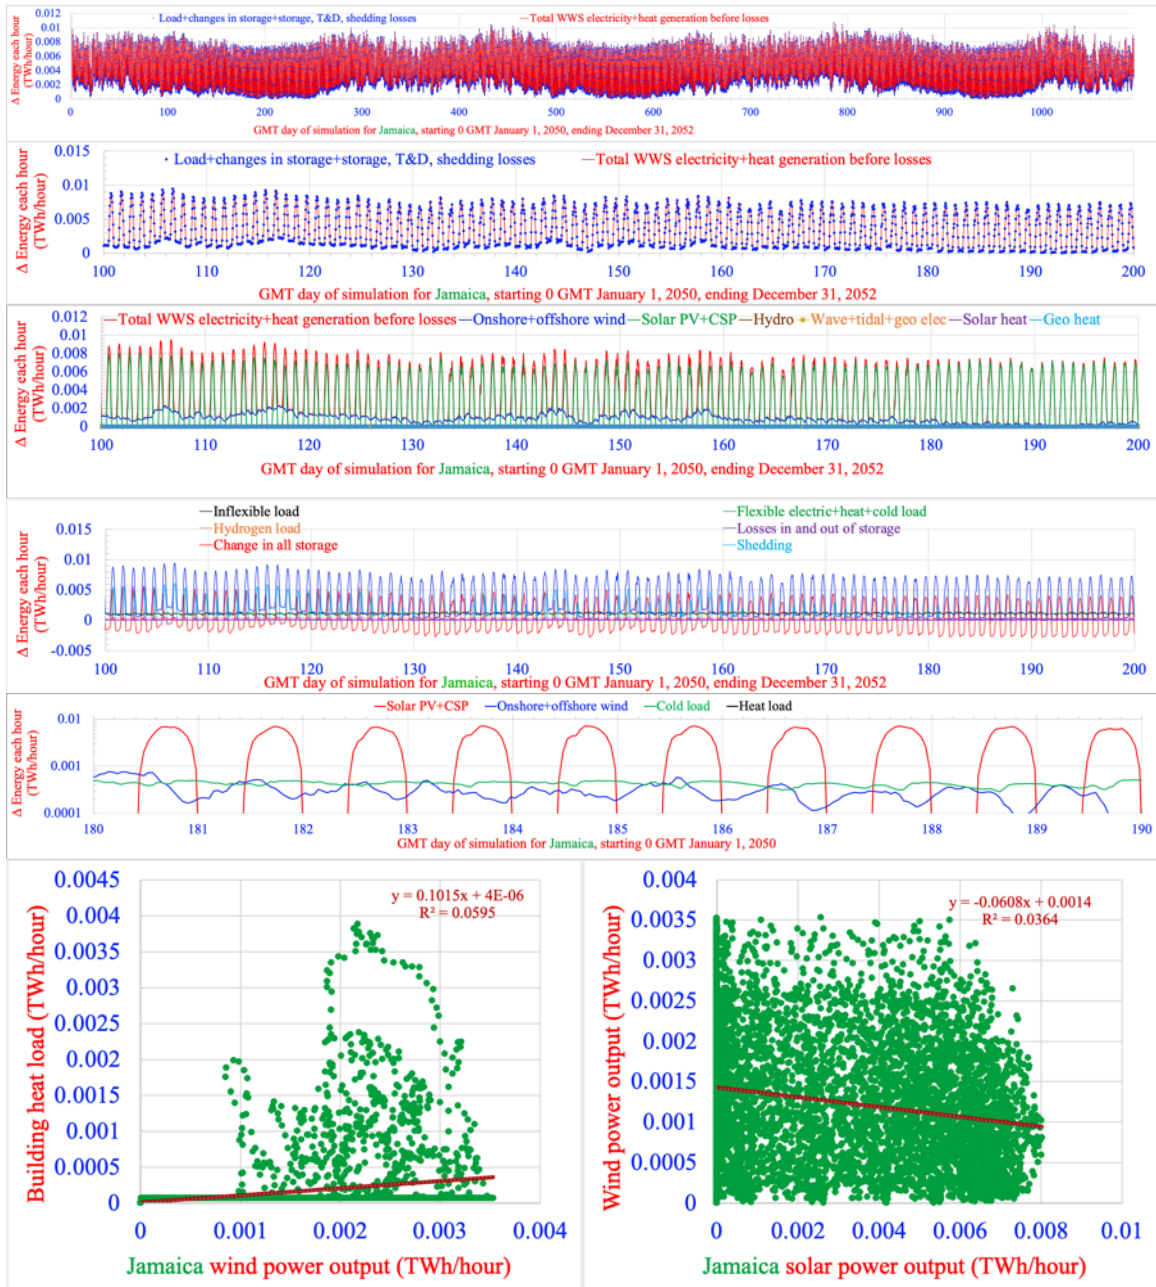

# JAPAN

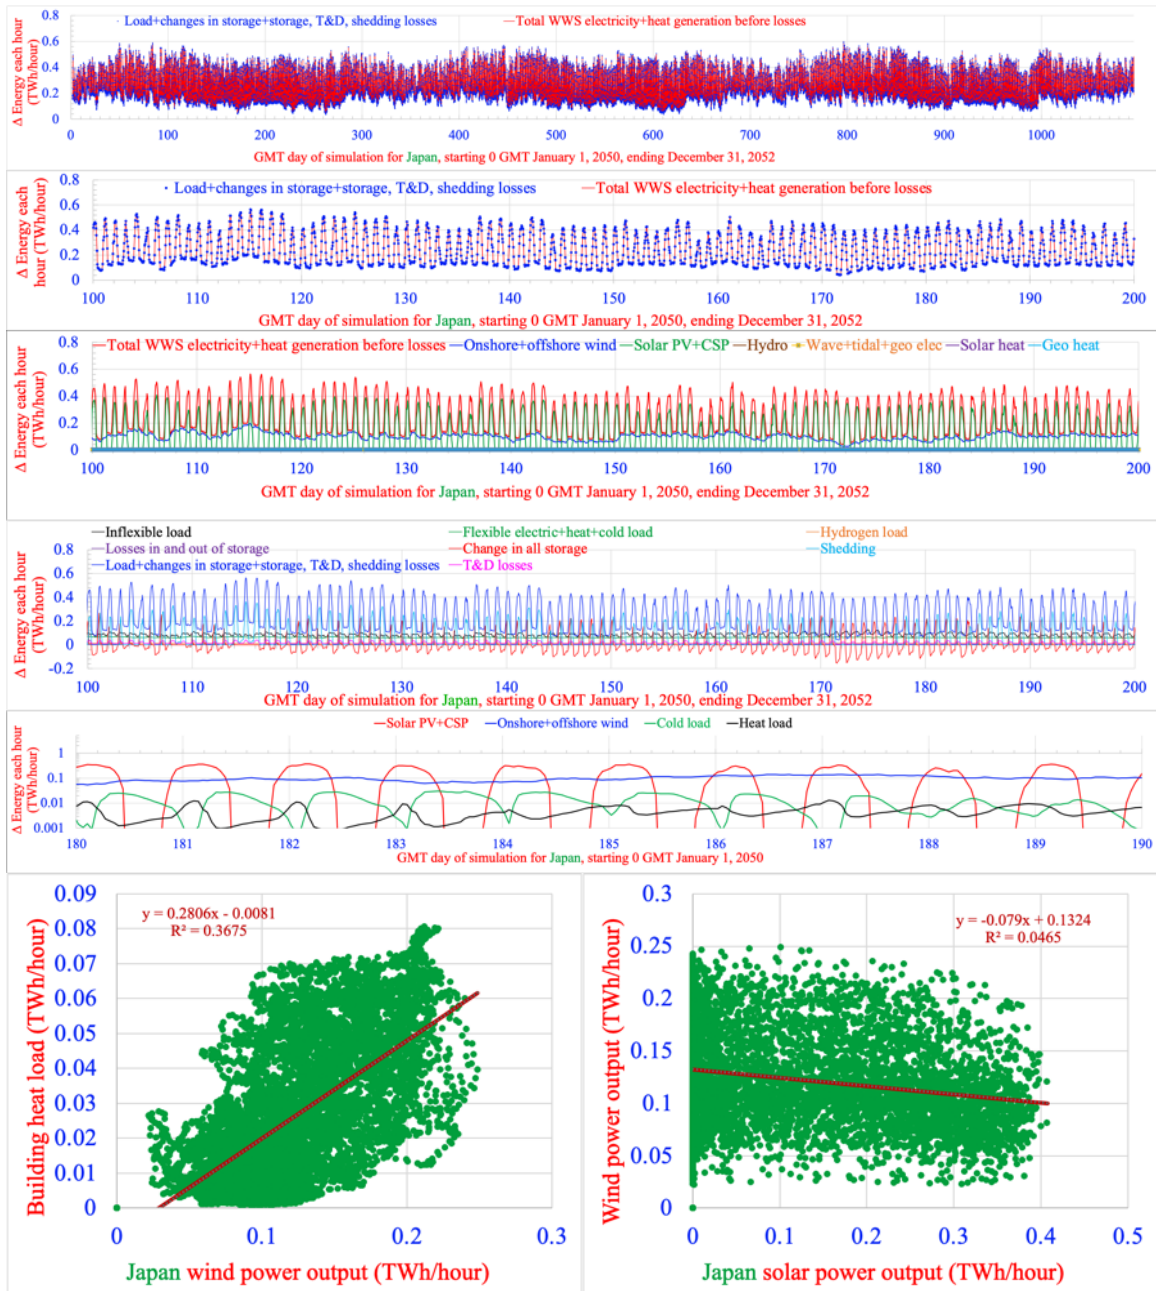

# MAURITIUS

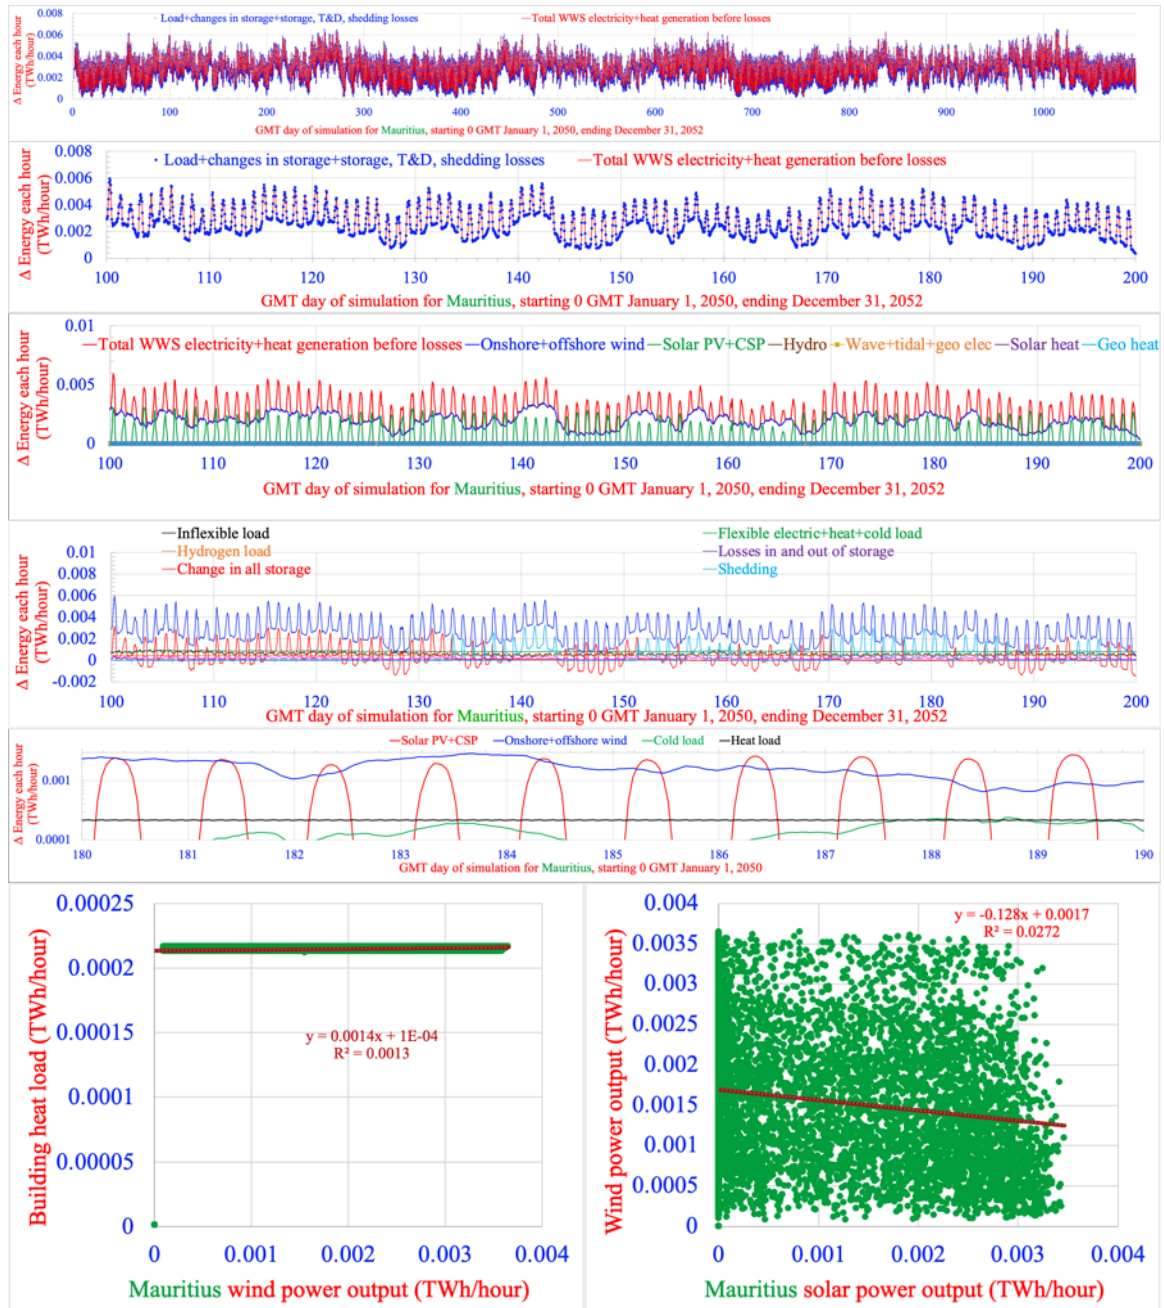



# MIDEAST

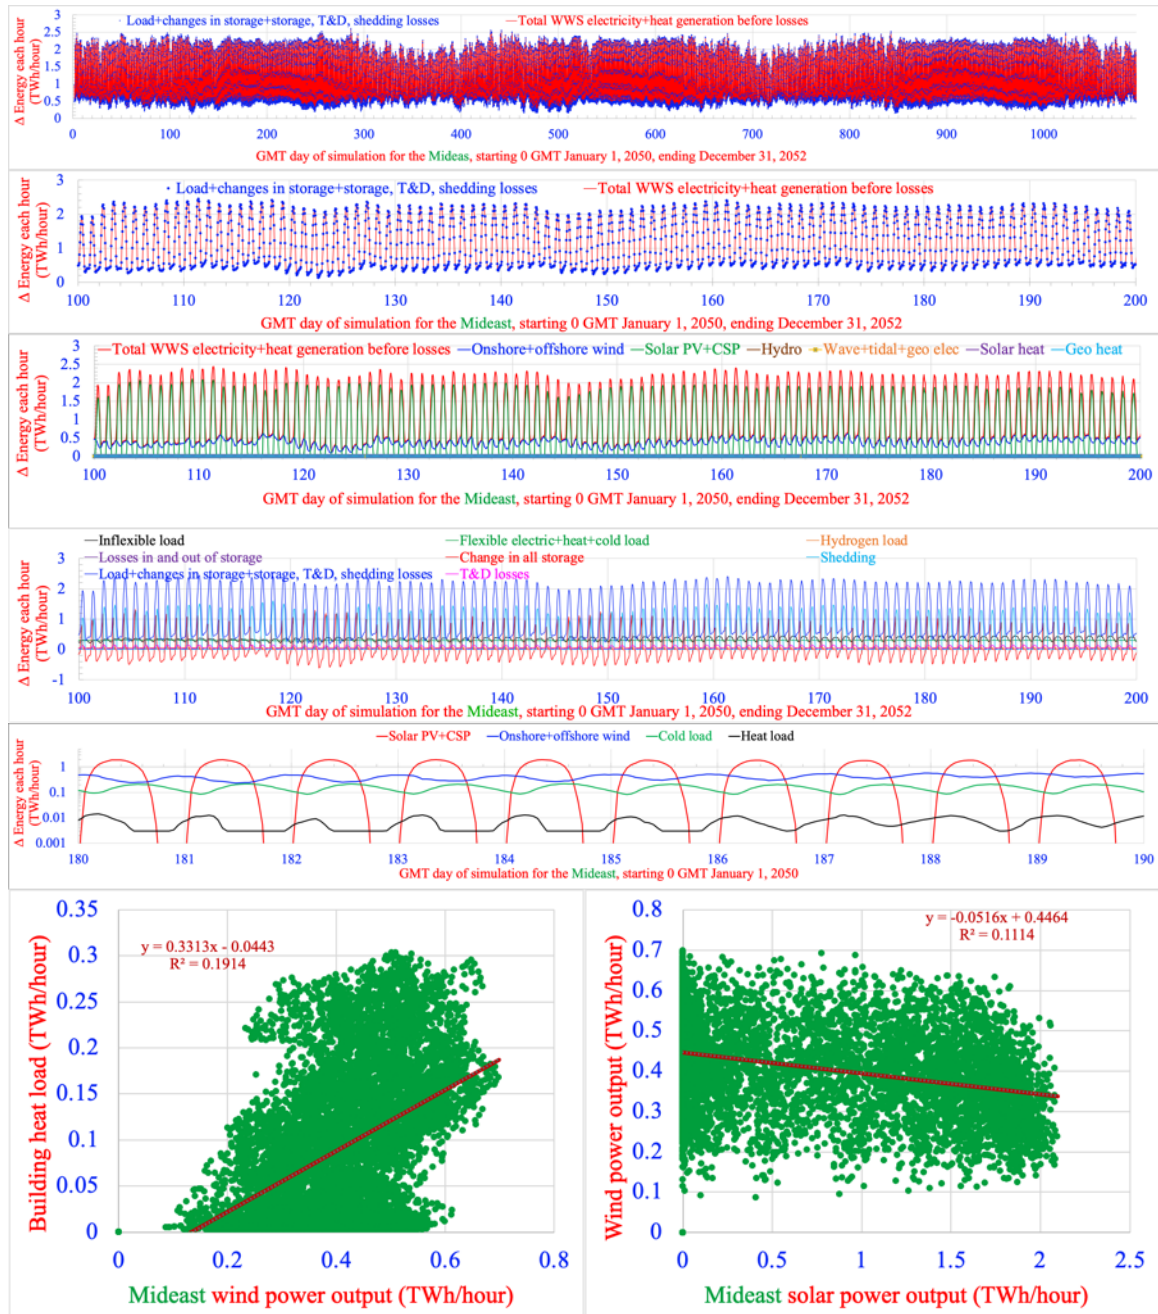



## NEW ZEALAND

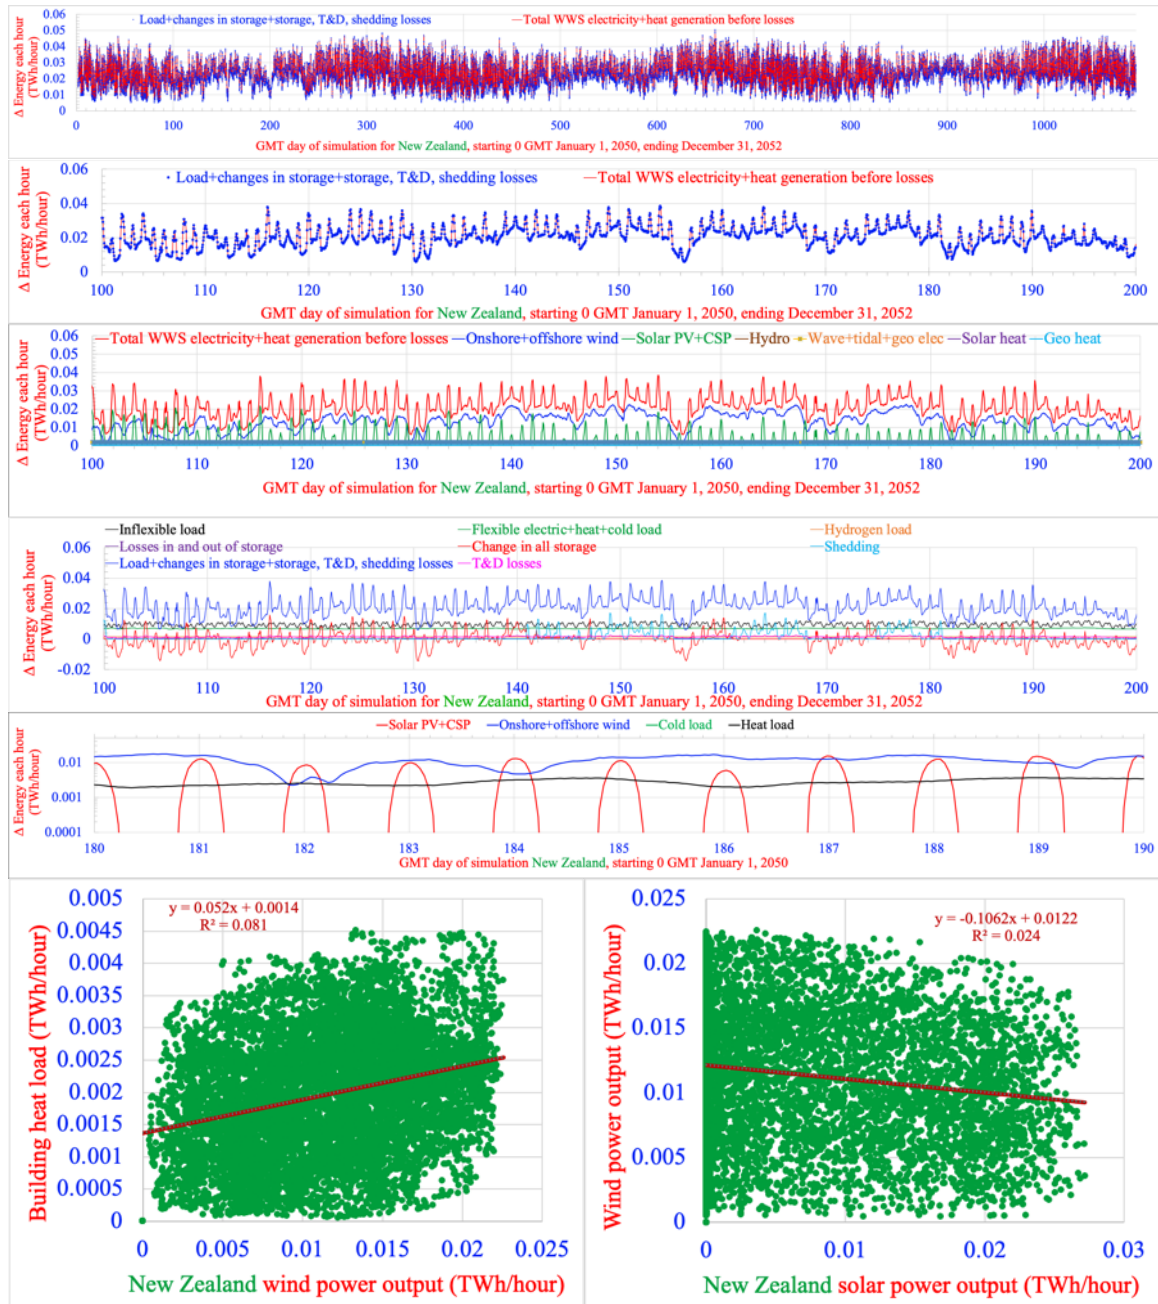

# PHILIPPINES

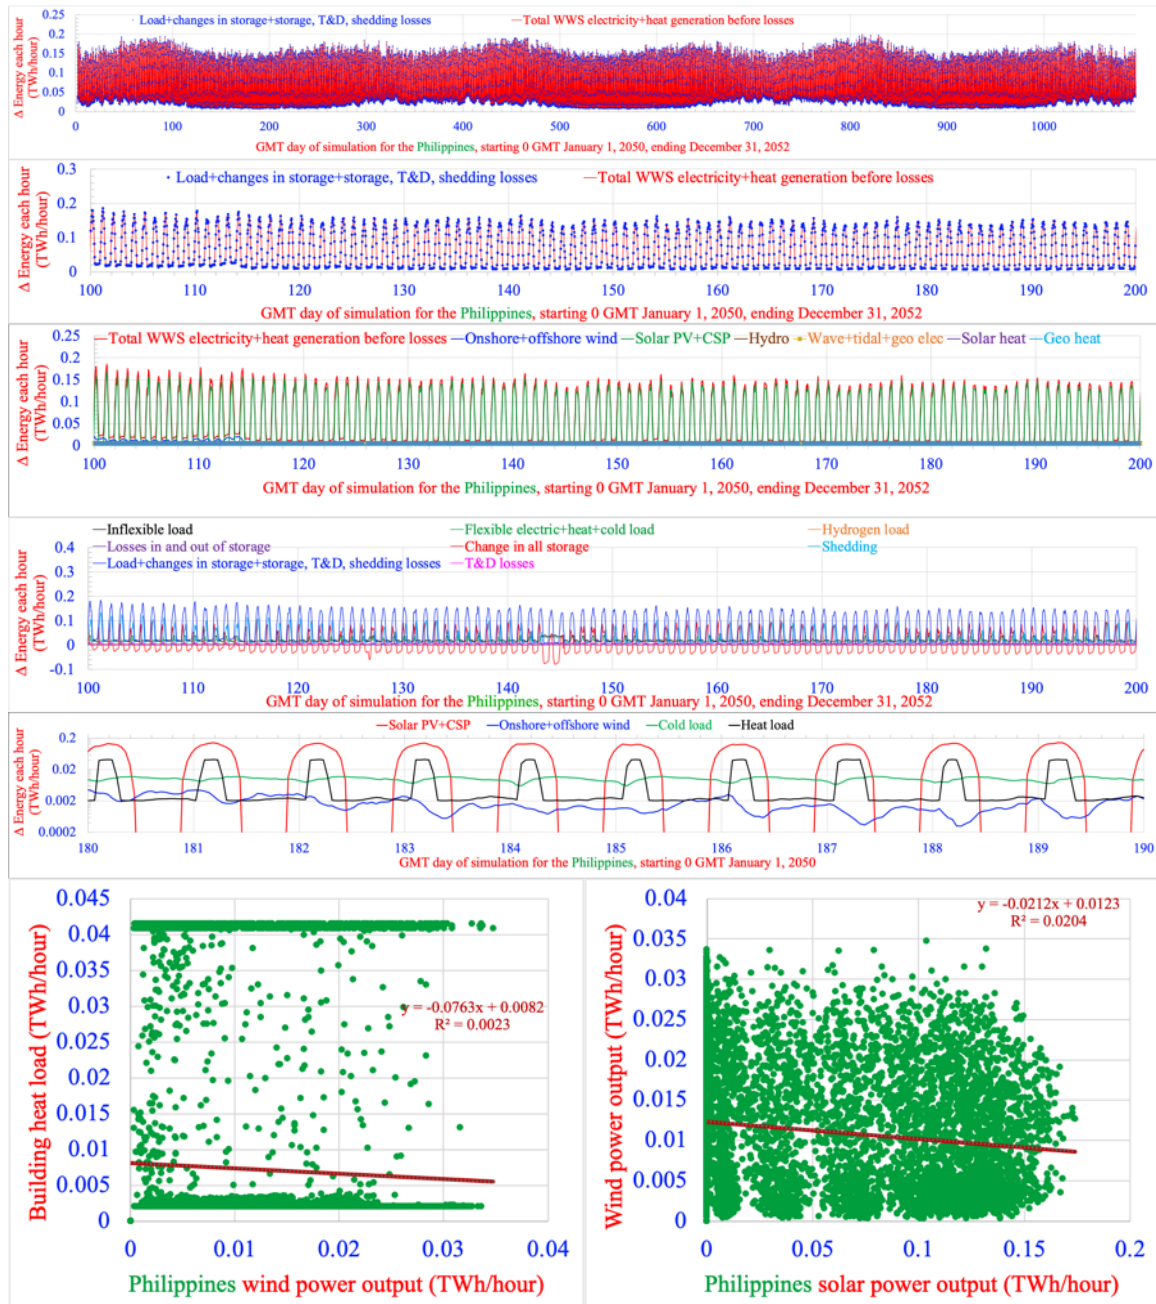

## RUSSIA REGION

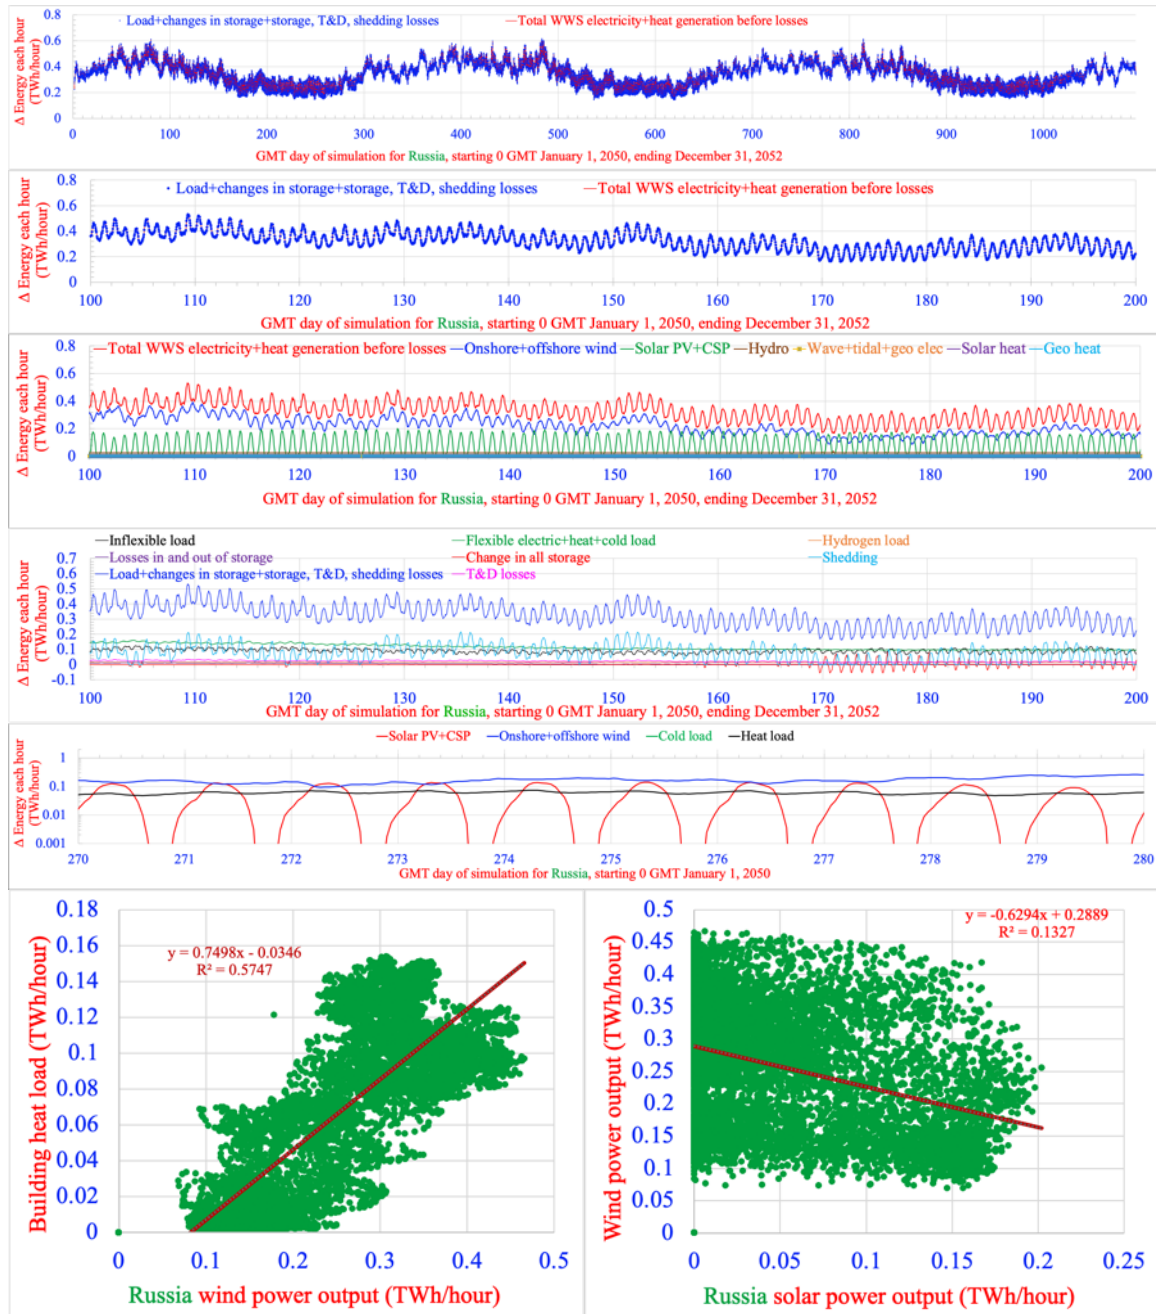

## SOUTH AMERICA

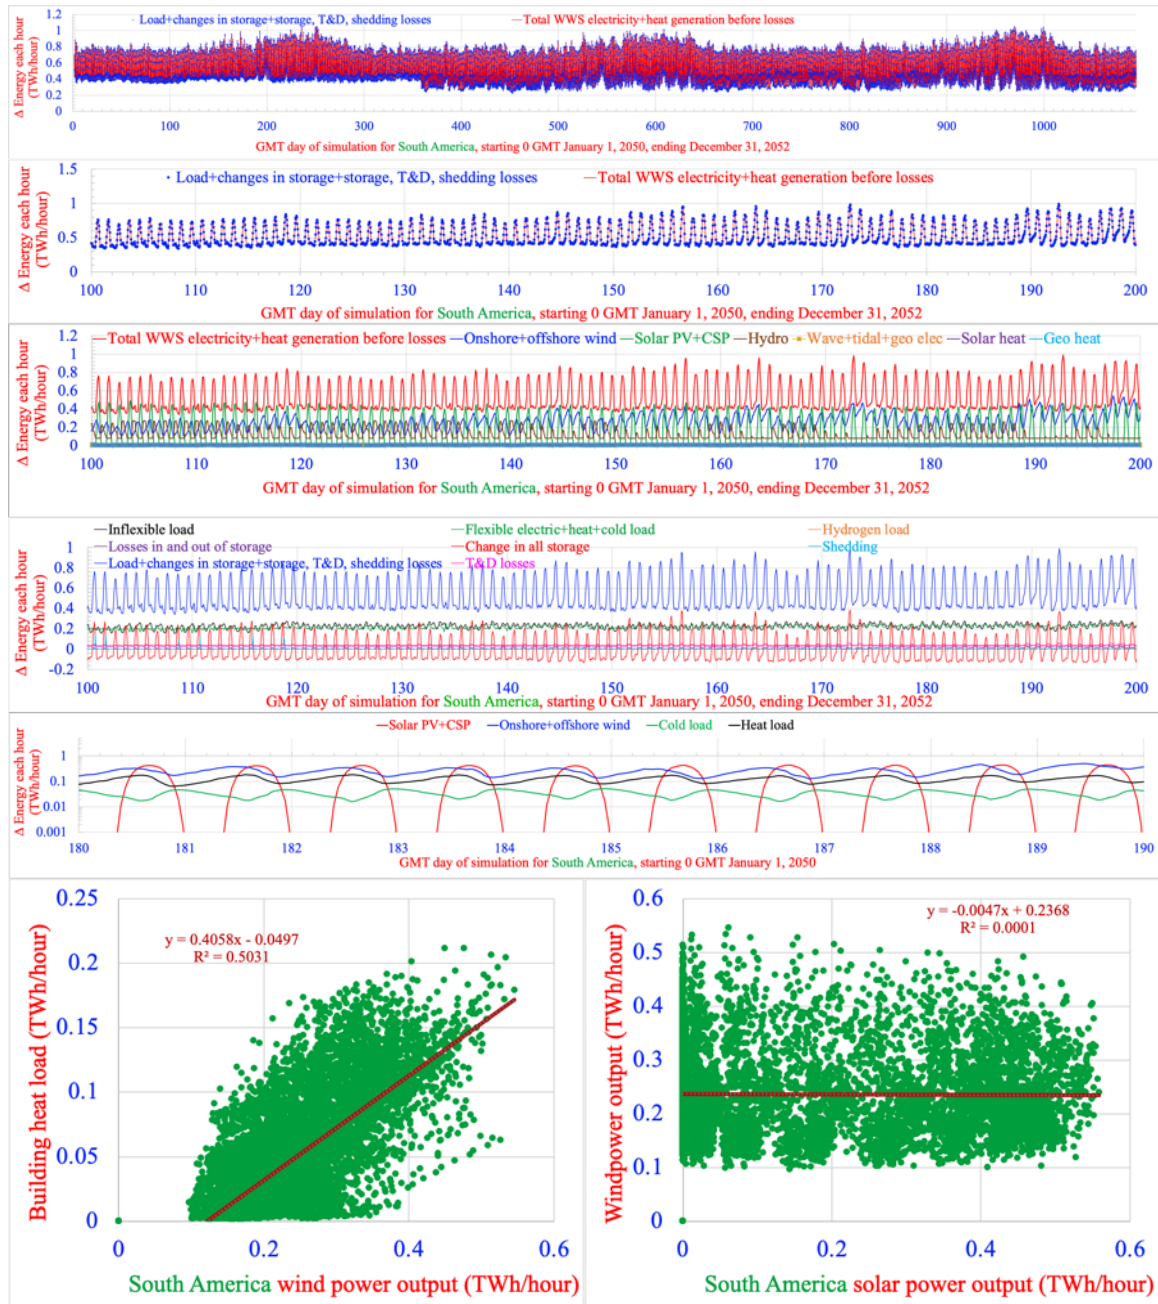



## SOUTHEAST ASIA

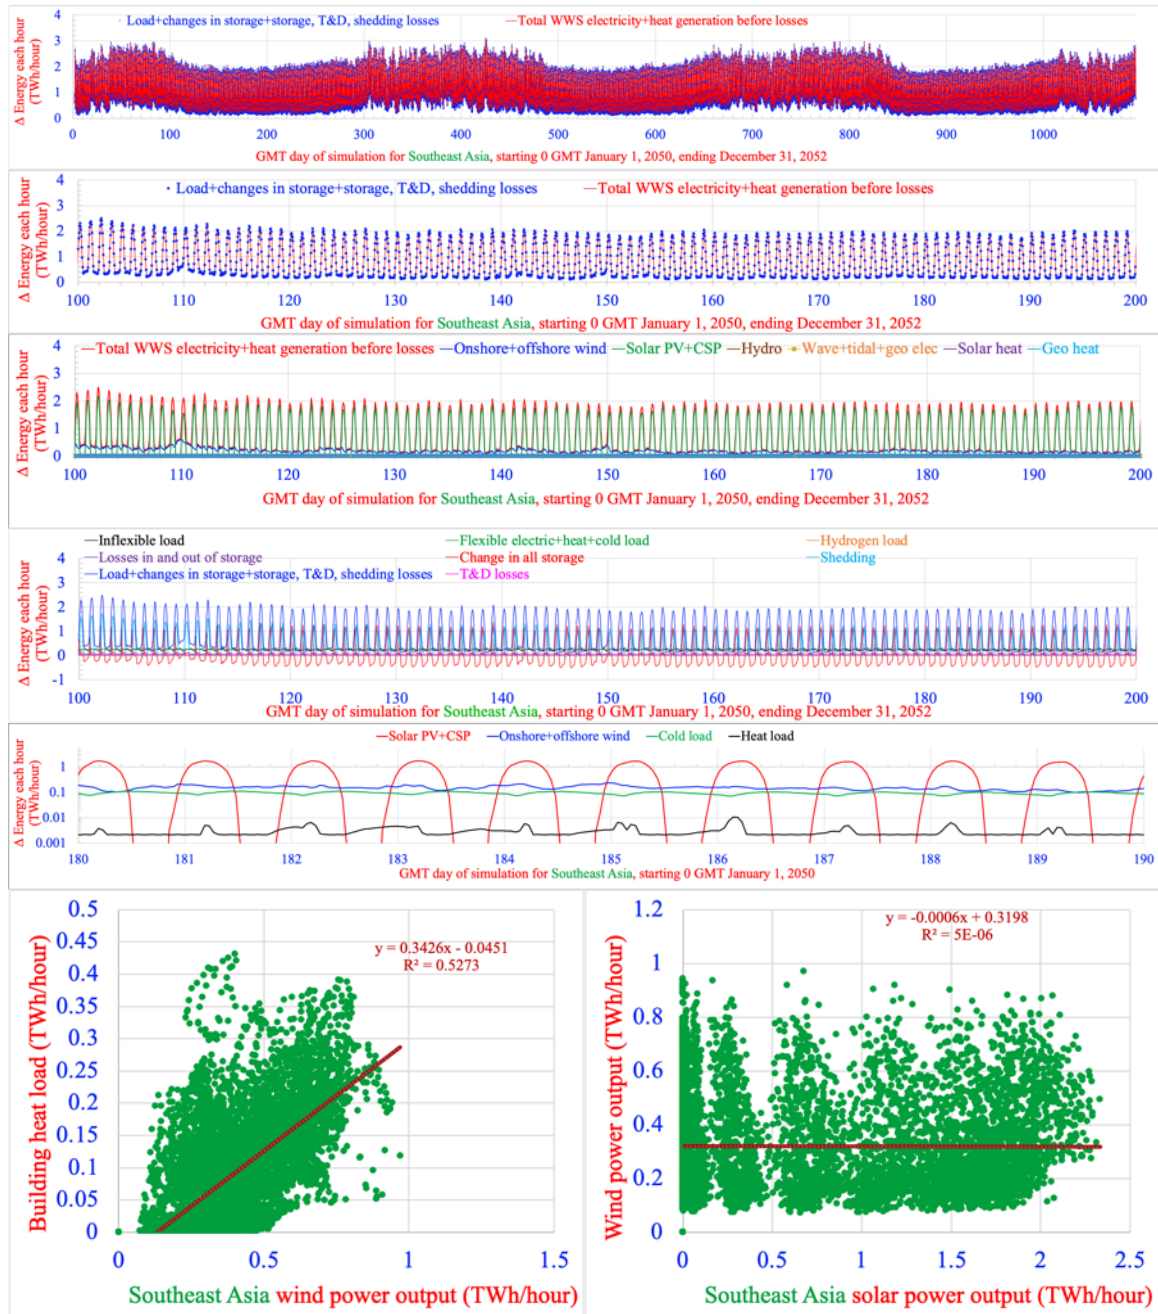

## SOUTH KOREA

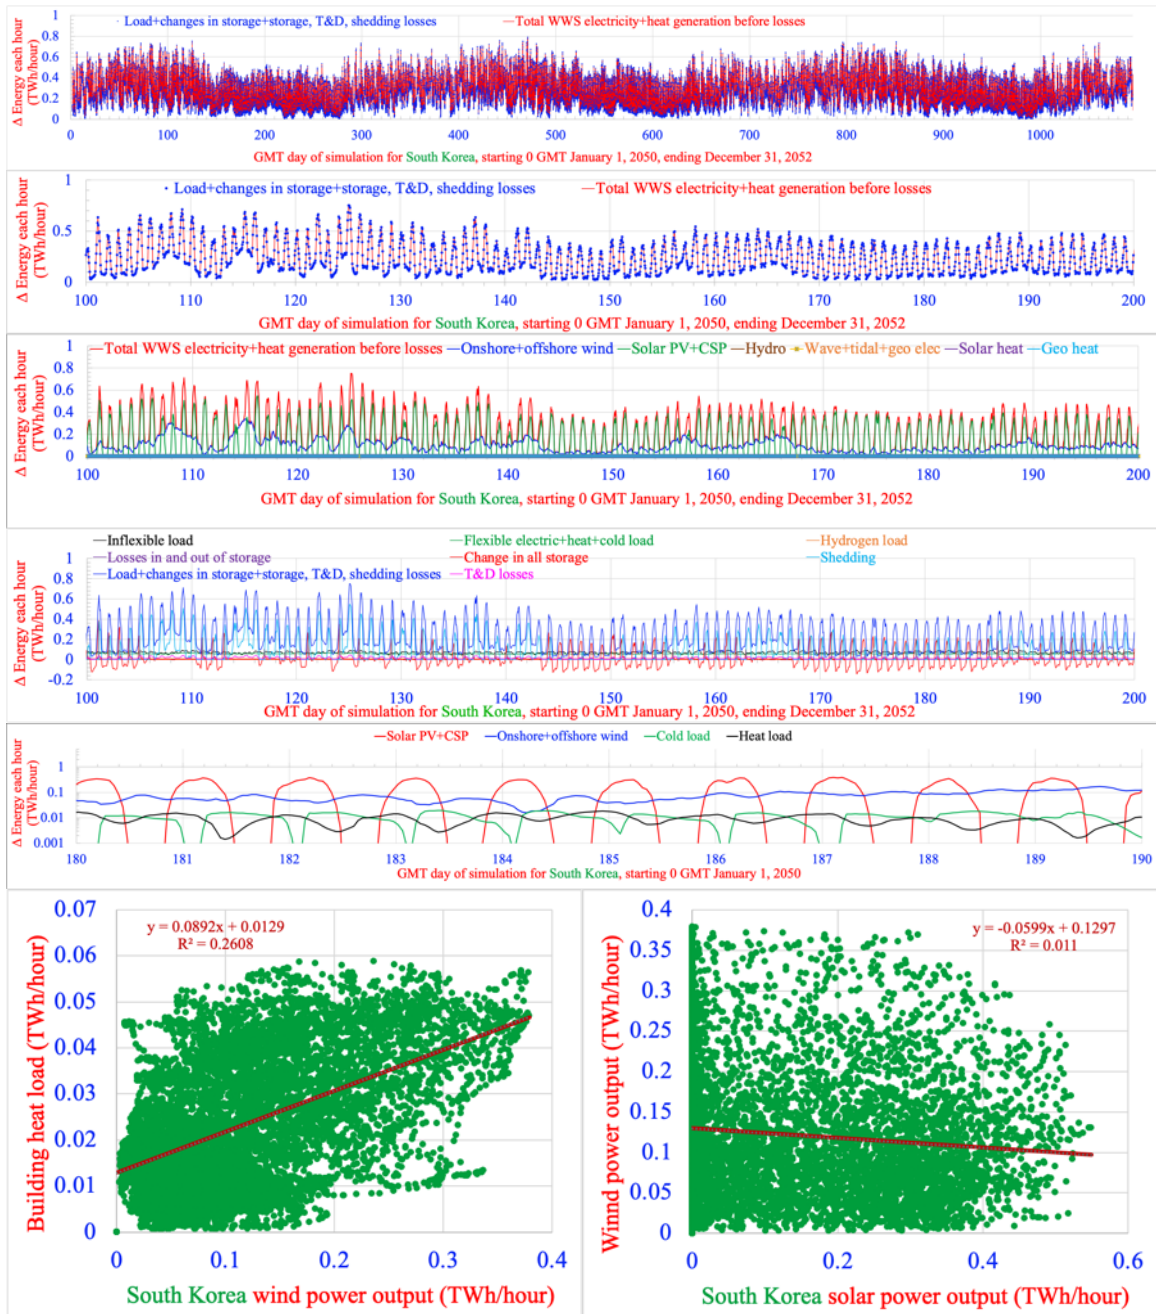

# TAIWAN

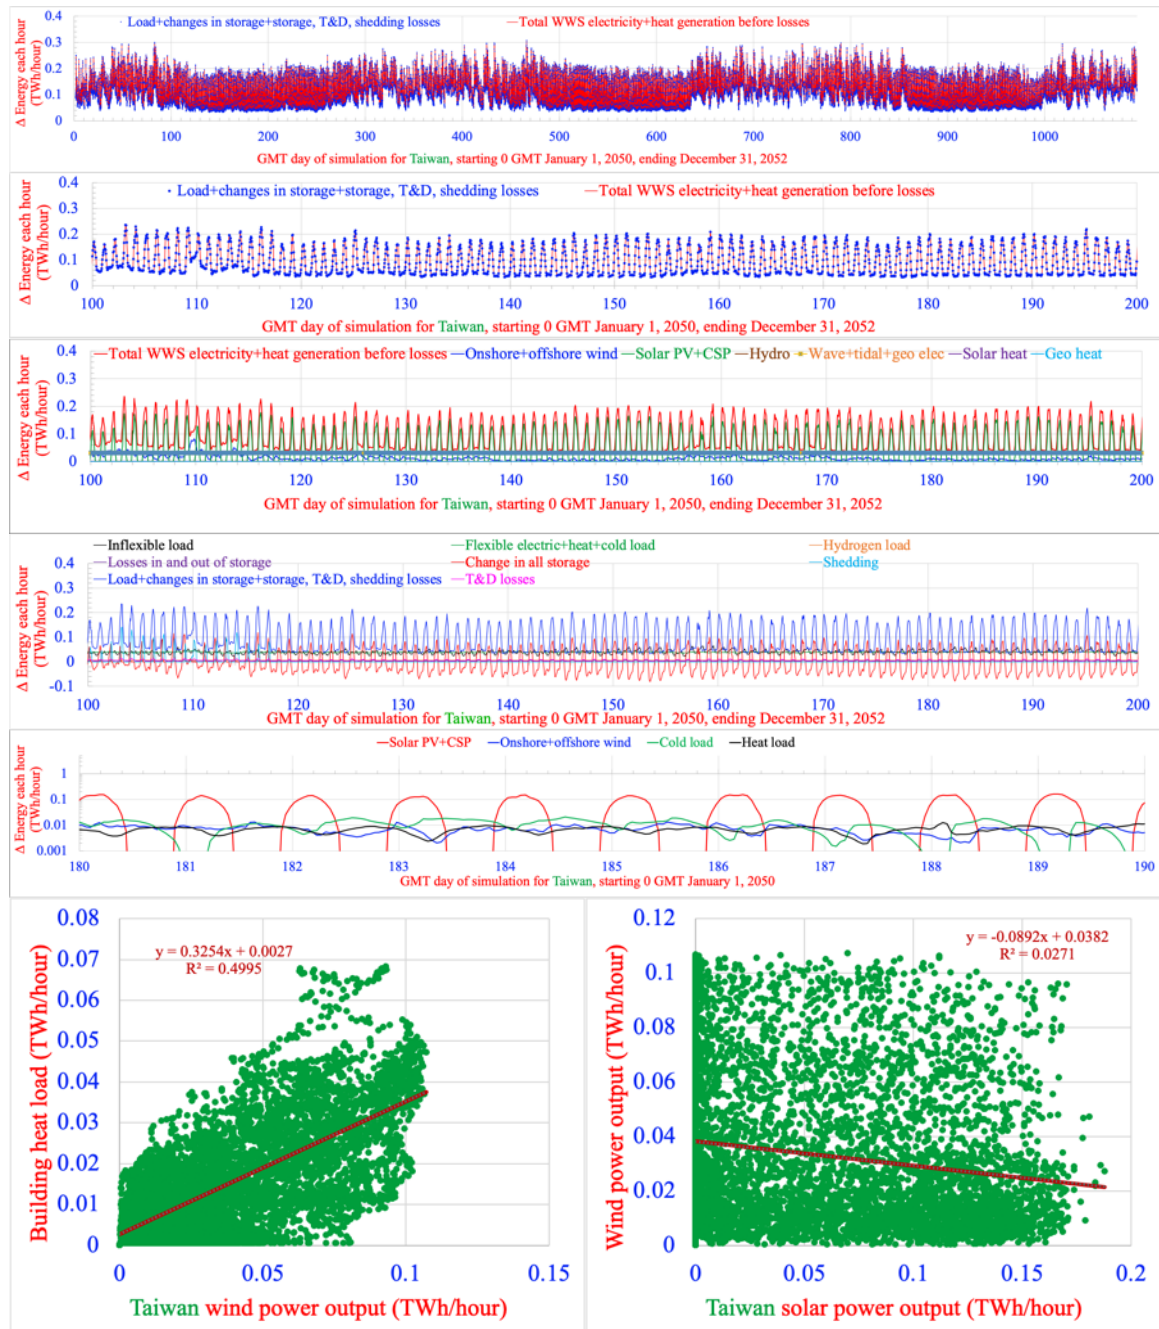



## UNITED STATES

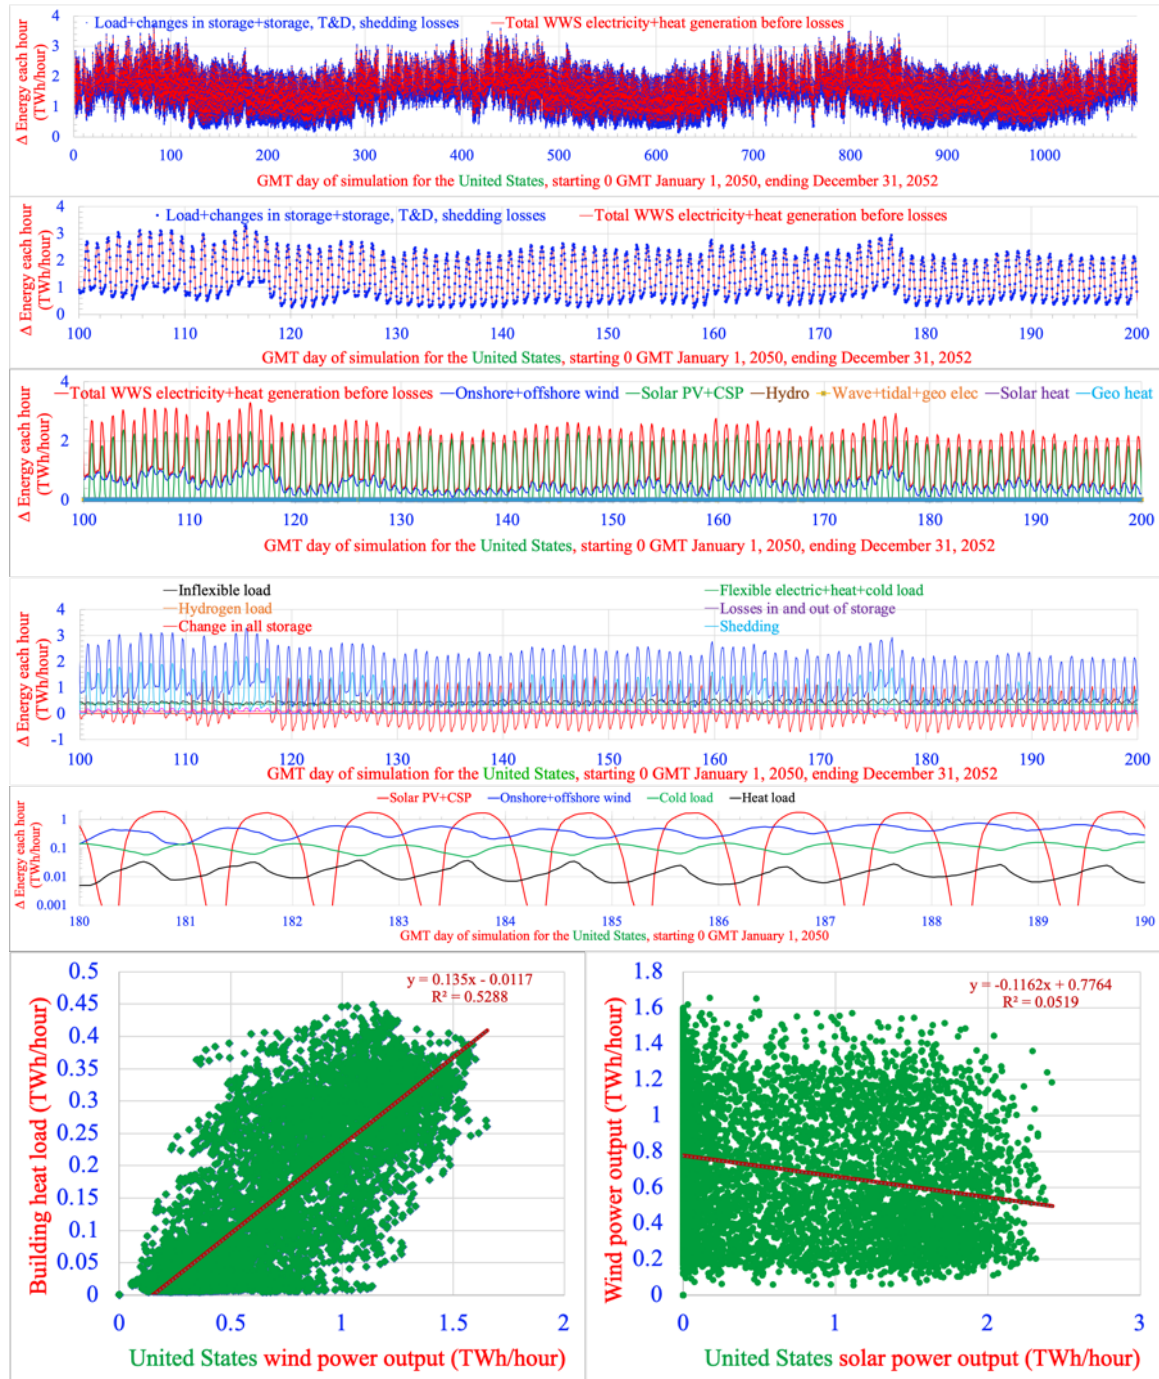



**Figure S3.** Sensitivity of the levelized cost and some of its components to the fraction of all building hot and cold air and water supply from district heating and cooling in selected countries. The components included are the cost of batteries, thermal storage, and/or total electricity generation. Thermal storage costs include the costs of UTES, HW-STES, CW-STES, ICE storage, and heat pumps to provide heat and cold for thermal energy storage (Table S19). The only component of total electricity generation that is changing is the quantity of offshore wind. The low fraction district heating and cooling is the baseline value for each country. The countries chosen are among those with the highest LCOEs with 100% WWS at the baseline fraction of district heating and cooling in Table 4.

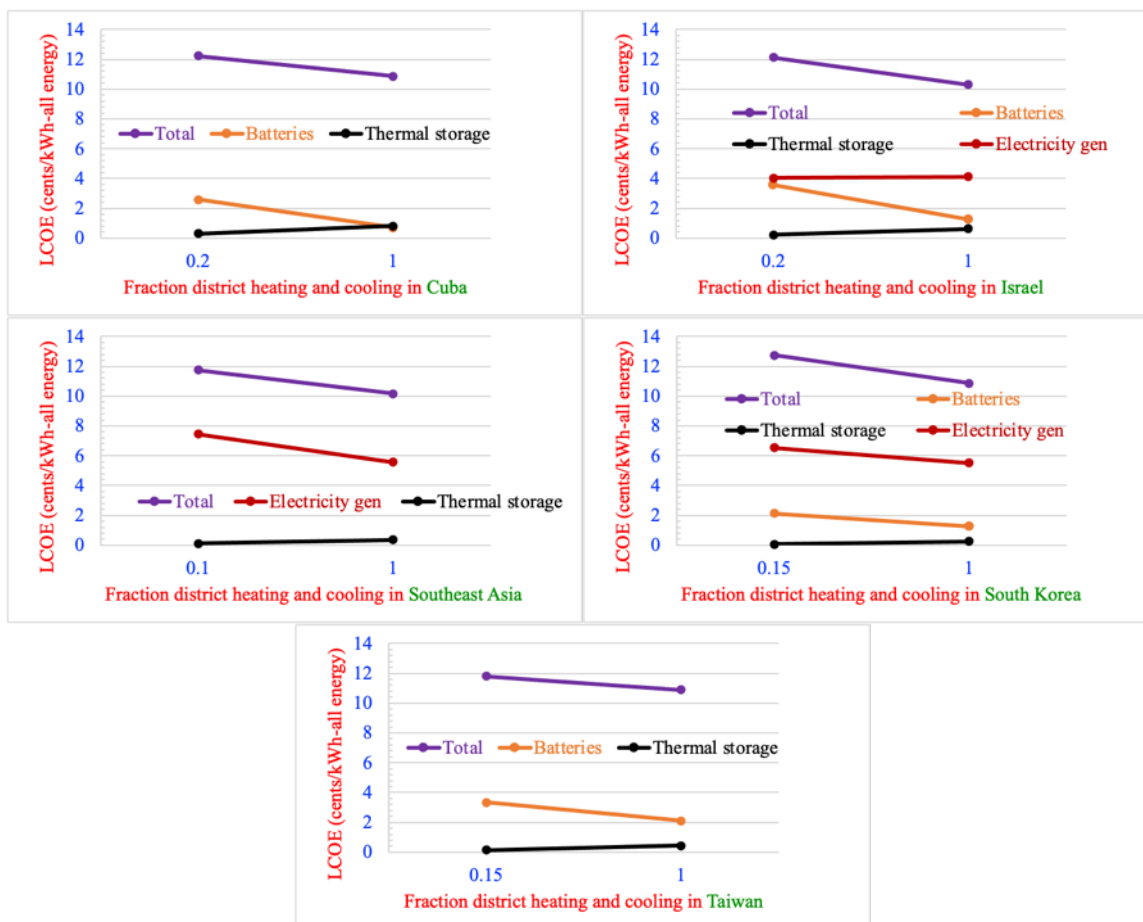

## Supporting References

- EIA (Energy Information Administration). U.S. International Energy Outlook 2016. DOE/EIA-0484, 2016, [http://www.eia.gov/forecasts/ieo/pdf/0484\(2016\).pdf](http://www.eia.gov/forecasts/ieo/pdf/0484(2016).pdf) (accessed Oct. 6, 2021).
- EIA (Energy Information Administration). Monthly round-trip efficiency by storage technology (Jan 2018-Dec 2019). 2021a. <https://www.eia.gov/todayinenergy/detail.php?id=46756>.
- EIA (Energy Information Administration). U.S. product supplied of finished motor gasoline. 2021b. <https://www.eia.gov/dnav/pet/hist/LeafHandler.ashx?n=PET&s=MGFUPUS2&f=M>.
- Enevoldsen P, Jacobson MZ. (2021), Data investigation of installed and output power densities of onshore and offshore wind turbines worldwide. *Energy for Sustainable Development* 2021;60:40-51.
- ENTSO-E (European Network of Transmission System Operators for Electricity) (2016). European load data, <https://www.entsoe.eu/db-query/country-packages/production-consumption-exchange-package>.
- Evans JD. Straightforward statistics for the behavioral sciences. 1996. Pacific Grove, CA: Brooks/Cole Publishing.
- FERC (Federal Regulatory Energy Commission). Pumped storage projects. 2021. <https://www.ferc.gov/industries-data/hydropower/licensing/pumped-storage-projects>.
- Geotab. To what degree does temperate impact EV range. 2020. <https://www.geotab.com/blog/ev-range/>.
- IEA (International Energy Agency), Data and Statistics for 2018, OECD Publishing, Paris. 2021. Retrieved October 5, 2021, from <https://www.iea.org/data-and-statistics>
- IHA (International Hydropower Association), 2021 hydropower status report, 2021, <https://www.hydropower.org/publications/2021-hydropower-status-report> (accessed Oct. 9, 2021).
- IRENA, Renewable capacity statistics 2021, 2021 [https://www.irena.org/-/media/Files/IRENA/Agency/Publication/2021/Apr/IRENA\\_RE\\_Capacity\\_Statistics\\_2021.pdf](https://www.irena.org/-/media/Files/IRENA/Agency/Publication/2021/Apr/IRENA_RE_Capacity_Statistics_2021.pdf) (accessed Oct. 9, 2021).
- Irvine, M., and M. Rinaldo, Tesla's battery day and the energy transition, 2020, <https://www.dnv.com/feature/tesla-battery-day-energy-transition.html> (accessed November 4, 2021).
- Jacobson MZ. GATOR-GCMOM: A global through urban scale air pollution and weather forecast model: 1. Model design and treatment of subgrid soil, vegetation, roads, rooftops, water, sea ice, and snow. *J Geophys Res: Atmospheres* 2001;106:5385-5401.
- Jacobson MZ, Kaufmann YJ, Rudich Y. Examining feedbacks of aerosols to urban climate with a model that treats 3-D clouds with aerosol inclusions. *J Geophys Res: Atmospheres* 2007;112:D24205.
- Jacobson MZ, Archer CL. Saturation wind power potential and its implications for wind energy. *Proc Natl Acad Sci* 2012;109:15,679-15,684.
- Jacobson MZ, Delucchi MA, Cameron MA, Frew BA. A low-cost solution to the grid reliability problem with 100% penetration of intermittent wind, water, and solar for all purposes. *Proc Nat Acad Sci* 2015;112:15,060-15,065.

- Jacobson MZ, Delucchi MA, Bauer ZAF, Goodman SC, Chapman WE, Cameron MA, Bozonnat C, Chobadi L, Clonts HA, Enevoldsen P, Erwin JR, Fobi SN, Goldstrom OK, Hennessy EM, Liu J, Lo J, Meyer CB, Morris SB, Moy KR, O'Neill PL, Petkov I, Redfern S, Schucker R, Sontag MA, Wang J, Weiner E, Yachanin AS. 100% clean and renewable wind, water, and sunlight (WWS) all-sector energy roadmaps for 139 countries of the world. *Joule* 2017;1:108-121.
- Jacobson MZ, Jadhav V. World estimates of PV optimal tilt angles and ratios of sunlight incident upon tilted and tracked PV panels relative to horizontal panels. *Solar Energy* 2018;169:55-66.
- Jacobson MZ, Delucchi MA, Cameron MA, Mathiesen BV. Matching demand with supply at low cost among 139 countries within 20 world regions with 100 percent intermittent wind, water, and sunlight (WWS) for all purposes. *Renewable Energy* 2018;123:236-248.
- Jacobson MZ, Delucchi MA, Cameron MA, Coughlin SJ, Hay C, Manogaran IP, Shu Y, von Krauland A-K. Impacts of Green New Deal energy plans on grid stability, costs, jobs, health, and climate in 143 countries. *One Earth* 2019;1:449-463.
- Jacobson MZ. 100% Clean, Renewable Energy and Storage for Everything. Cambridge University Press, New York. 2020. 427 pp.
- Jacobson, M.Z. (2021a). On the correlation between building heat demand and wind energy supply and how it helps to avoid blackouts. *Smart Energy* 1, 100009.
- Jacobson, M.Z. (2021b). The cost of grid stability with 100% clean, renewable energy for all purposes when countries are isolated versus interconnected. *Renewable Energy* 179, 1065-1075.
- Jacobson, M.Z., Delucchi M.A. (2021). Spreadsheets for 145-country, 24-world region WWS study, <http://web.stanford.edu/group/efmh/jacobson/Articles/I/145Country/145-Spreadsheet.xlsx>
- Katalenich S. Analyzing the feasibility of transitioning United States Army vehicles, contingency bases, and permanent bases toward 100% clean, renewable energy. Ph.D. Dissertation, Stanford University. 2020. 828 pp.
- Lazard. Lazard's levelized cost of energy analysis – Version 15.0. 2021, <https://www.lazard.com/media/451881/lazards-levelized-cost-of-energy-version-150-vf.pdf> (accessed October 29, 2021).
- Lund, J.W., and A.N. Toth, Direct utilization of geothermal energy 2020 worldwide review, Proc. World Geothermal Congress 2020, <https://www.geothermal-energy.org/pdf/IGAstandard/WGC/2020/01018.pdf> (accessed Oct. 9, 2021).
- Mancini T. Advantages of using molten salt. Sandia National Laboratories. 2006. [http://www.webcitation.org/60AE7heEZ?url=http://www.sandia.gov/Renewable\\_Energy/solarthermal/NSTTF/salt.htm](http://www.webcitation.org/60AE7heEZ?url=http://www.sandia.gov/Renewable_Energy/solarthermal/NSTTF/salt.htm).
- Neocarbon Energy (2016). Future energy system, <http://neocarbonenergy.fi/internetofenergy/> (accessed October 9, 2021).
- NREL (National Renewable Energy Laboratory). Jobs and Economic Development Impact Models (JEDI). 2019. Retrieved August 11, 2021, from, <https://www.nrel.gov/analysis/jedi>.
- Rahi OP, Kumar A. Economic analysis for refurbishment and uprating of hydropower plants. *Renewable Energy* 2016;86:1197-1204.

- Sonnen. Take a look inside ecoLinux. 2021. <https://sonnenusa.com/en/sonnen-ecolinx/#specifications>.
- Tesla. Powerpack. 2021. <https://www.tesla.com/powerpack>
- U.S. DOE (U.S. Department of Energy). Fuel economy in cold weather. 2021. <https://www.fueleconomy.gov/feg/coldweather.shtml>.
- Weiss, W., and M. Spork-Dur, Solar heat worldwide, 2020, <https://www.iea-shc.org/Data/Sites/1/publications/Solar-Heat-Worldwide-2020.pdf> (accessed Oct. 9, 2021).
- World Health Organization (WHO). Global health observatory data. 2017. Retrieved August 10, 2021, from, [https://www.who.int/gho/phe/outdoor air pollution/en](https://www.who.int/gho/phe/outdoor_air_pollution/en).
